# Supplementary material for: Cell-Free DNA Modification Dynamics in Abiraterone Acetate-Treated Prostate Cancer Patients
Source: Oxford University Press journal article supplement (doi:10.1158/1078-0432.ccr-18-0101), 2018-04-03
Supplement: 10780432ccr180101-sup-195306_2_supp_4641498_p5xh38.xlsx [file 10780432ccr180101-sup-195306_2_supp_4641498_p5xh38.xlsx]

## Sheet: Sheet1
Supplementary Table 2. Clinical information of all samples.
IndividualID	Cortico	Keto	Chemo1	Nchemo1	Chemo2	Nchemo2	Chemo3	Nchemo3	Chemo4	Nchemo4	NchemoTotal	PSA_Responder	PSA3m	PSA6m	PSA12m	StillAA	Death
BC203	TRUE	FALSE	IND195 histone deacetylase inhibitor	2	OGX427	3	Docetaxel	9	NA	0	14	FALSE	158	220	366.5	TRUE	FALSE
BC204	TRUE	FALSE	Docetaxel	9	mitoxantrone	1	NA	0	NA	0	10	TRUE	57.9	59	49.7	FALSE	FALSE
BC206	FALSE	TRUE	Docetaxel	3	NA	0	NA	0	NA	0	3	TRUE	27	38	NA	FALSE	FALSE
BC207	FALSE	TRUE	NA	0	NA	0	NA	0	NA	0	0	FALSE	263	NA	NA	FALSE	FALSE
BC208	FALSE	TRUE	Docetaxel	10	mitoxantrone	2	cis/etop	6	NA	0	18	TRUE	5.13	NA	NA	FALSE	FALSE
BC209	TRUE	FALSE	NA	0	NA	0	NA	0	NA	0	0	FALSE	110	NA	NA	FALSE	FALSE
BC210	FALSE	FALSE	Docetaxel	4	mitoxantrone	2	radium	3	NA	0	9	FALSE	14	NA	NA	FALSE	FALSE
BC211	FALSE	FALSE	Docetaxel/reolysin	7	NA	0	NA	0	NA	0	7	FALSE	220	NA	NA	FALSE	FALSE
BC212	FALSE	FALSE	IND205 PX866 (PI3K)	2	Docetaxel	9	NA	0	NA	0	11	TRUE	28.67	NA	NA	FALSE	FALSE
BC213	TRUE	FALSE	Docetaxel	5	NA	0	NA	0	NA	0	5	TRUE	19	27.7	NA	FALSE	FALSE
BC214	FALSE	TRUE	MDV3100	0	Docetaxel	10	NA	0	NA	0	10	FALSE	78	NA	0	FALSE	FALSE
BC215	TRUE	FALSE	Docetaxel/reolysin	6	OGX427+abiraterone	1	NA	0	NA	0	7	FALSE	128.9	NA	NA	FALSE	FALSE
BC216	TRUE	FALSE	Docetaxel	9	radium 223	5	NA	0	NA	0	14	TRUE	26.51	28.67	NA	FALSE	FALSE
BC217	TRUE	FALSE	OGX427	10	Docetaxel/Reolysin	7	custirsen cabazitaxel	8	NA	0	25	FALSE	226.6	NA	NA	TRUE	FALSE
BC218	FALSE	FALSE	Docetaxel	10	Docetaxel re-challenge in mCRPC setting	5	NA	0	NA	0	15	FALSE	99	NA	NA	TRUE	FALSE
BC219	FALSE	FALSE	pazopanib	51	EPI506	6	durvalumab	6	NA	0	63	TRUE	160	160	NA	TRUE	TRUE
PMH100	FALSE	FALSE	NA	0	NA	0	NA	0	NA	0	0	FALSE	36.42	53.05	58.66	FALSE	FALSE
PMH101	FALSE	FALSE	Docetaxel	10	NA	0	NA	0	NA	0	10	FALSE	57.66	70.19	94.12	FALSE	TRUE
PMH102	TRUE	FALSE	NA	0	NA	0	NA	0	NA	0	0	TRUE	6	3.14	2.13	TRUE	FALSE
PMH103	TRUE	FALSE	Docetaxel/Pantoprazole	3	Cabazitaxel	2	Mitoxantrone	3	Mitoxantrone	3	11	TRUE	9.95	4.23		FALSE	FALSE
PMH104	FALSE	FALSE	Docetaxel	9	NA	0	NA	0	NA	0	9	FALSE	140.53	182.27	235.72	FALSE	TRUE
PMH106	FALSE	FALSE	Docetaxel	8	NA	0	NA	0	NA	0	8	FALSE	240.55	154.36	212.78	FALSE	FALSE
PMH107	TRUE	TRUE	carboplatin/paclitaxel	6	Docetaxel	2	NA	0	NA	0	8	FALSE	47.47	67.75	114.12	FALSE	TRUE
PMH109	FALSE	FALSE	Docetaxel	6	Docetaxel	6	Docetaxel	3	Docetaxel	3	18	TRUE	50.32	3.66	10.68	FALSE	FALSE
PMH111	FALSE	FALSE	Docetaxel	12	NA	0	NA	0	NA	0	12	FALSE	12.16	9.78	11.89	FALSE	FALSE
PMH112	FALSE	FALSE	NA	0	NA	0	NA	0	NA	0	0	TRUE	18.58	2.9	0.31	TRUE	FALSE
PMH113	FALSE	FALSE	Docetaxel	4	NA	0	NA	0	NA	0	4	FALSE	31.94	47.94	200.59	FALSE	FALSE
PMH114	FALSE	FALSE	Doectaxel/Pantoprazole	6	Docetaxel then Doce/Carbo	6	NA	0	NA	0	12	TRUE	40.22	32.34	23.17	FALSE	FALSE
PMH115	FALSE	FALSE	Docetaxel	10	NA	0	NA	0	NA	0	10	FALSE	20.23	23.19	77.4	TRUE	TRUE
PMH117	FALSE	FALSE	Docetaxel	3	Cabazitaxel	2	NA	0	NA	0	5	TRUE	25.73	18.19	16.74	FALSE	FALSE
PMH118	FALSE	FALSE	Docetaxel/Pantoprazole	5	NA	0	NA	0	NA	0	5	TRUE	143.21	90.58	88.96	TRUE	FALSE
PMH119	FALSE	TRUE	Docetaxel/Pantoprazole	10	NA	0	NA	0	NA	0	10	FALSE	31.58	35.52	49.58	FALSE	FALSE
PMH120	TRUE	FALSE	Docetaxel	4	NA	0	NA	0	NA	0	4	FALSE	36.8	54.29	63.21	FALSE	TRUE
