# Supplementary material for: Cell-Free DNA Modification Dynamics in Abiraterone Acetate-Treated Prostate Cancer Patients
Source: Oxford University Press journal article supplement (doi:10.1158/1078-0432.ccr-18-0101), 2018-04-03
Supplement: 10780432ccr180101-sup-195306_2_supp_4641499_p87j12.xlsx [file 10780432ccr180101-sup-195306_2_supp_4641499_p87j12.xlsx]

## Sheet: Sheet1
Supplementary Table 3. List of significant AA-DMPs at FDR q < 0.2.
IlmnID	Chr	Coordinate (hg19)	P-value	FDR Q-value	Gene	CpG island	Intercept	Responder	Responder p < 0.05	Visit TimePoint	Responder:VisitTimePoint	Interaction p < 0.05	Associated clinical outcome for genes with q < 0.05	Associated cancer type for genes with q < 0.05	Reference
cg15900387	1	150738905	4.4e-08	<0.05	CTSS		0.63	0.083	*	0.00015	-0.00041	*	Increased tumor angiogenesis and invasiveness	Multiple, including PCa	PMID: 19487544; PMID: 26597527
cg11610350	3	64253705	6.4e-08	<0.05		Island	0.315	-0.0064		0.00042	-0.00083	*
cg16051361	12	72149658	1.3e-07	<0.05	RAB21	Shore	0.333	-0.061	*	2.1e-05	-8.3e-05		Increased cancer cell migration, adhesion to collagen and bone	Multiple, including PCa	PMID: 23176488; PMID: 22120710; PMID: 16754960
cg02121529	13	40746549	1.7e-07	<0.05		Island	0.145	0.068	*	0.00028	-0.00082	*
ch.10.7244193R	10	7204187	3.9e-07	<0.05			0.087	-0.0069		-7.1e-05	0.00029	*
cg11547104	4	7593493	3.9e-07	<0.05	SORCS2	Island	0.855	0.031	*	0.00011	-0.0002	*
cg16771771	6	169243410	7.9e-07	<0.05		Shore	0.744	0.0061		0.00023	-0.00073	*
cg20782117	7	95865631	9.5e-07	<0.05	SLC25A13		0.414	0.06	*	-3.1e-05	-7.4e-06
cg25617519	2	23668469	1.4e-06	<0.05	KLHL29		0.868	-0.025	*	1.2e-05	-0.00019
cg25610515	1	23495577	1.4e-06	<0.05	LUZP1		0.301	0.1	*	0.00032	-0.00089	*
cg14899522	10	6472750	1.9e-06	<0.05	PRKCQ		0.926	0.019	*	0.00012	-0.00034	*	Induced tumorigenesis	Breast cancer	PMID: 27663795; PMID: 24891615
cg20744163	10	80999841	2.3e-06	<0.05	ZMIZ1	Shelf	0.752	-0.014		0.00041	-0.0011	*	Increased AR sensitivity and activity	PCa	PMID: 21949845
cg01815536	1	115576076	2.4e-06	<0.05	TSHB		0.88	-0.02	*	-8.6e-05	0.00027	*	Increased PCa risk	PCa	PMID: 23118893; PMID: 16042724
cg08730348	16	31214307	2.9e-06	<0.05	PYCARD	Shore	0.147	0.027	*	-5.8e-05	-6.3e-05		Reduced tumor apoptosis, incresed aggressiveness	Multiple, including PCa	PMID: 16425203; PMID: 24709797
cg00041599	5	176240038	2.9e-06	<0.05	UNC5A	Shore	0.4	-0.073	*	-0.00032	0.00068	*	Reduced tumor suppression	Multiple	PMID: 20372800; PMID: 24737586
cg25461186	12	122518089	3e-06	<0.05	MLXIP	Shore	0.671	-0.043	*	-0.00026	0.00057	*	Reduced tumorigenesis	Multiple	PMID: 25640402
cg08112737	4	57178051	3.2e-06	<0.05	KIAA1211	Shelf	0.87	-0.025	*	1.9e-05	-4.2e-06
cg08889336	7	47294278	3.5e-06	<0.05		Island	0.09	-0.013	*	6.8e-05	-5.8e-05
cg09185884	17	73056145	3.6e-06	<0.05	KCTD2		0.363	-0.041	*	-0.00036	0.00089	*
cg07056285	5	122433740	3.8e-06	<0.05	PRDM6	Shore	0.36	-0.014		-0.00041	0.00094	*
cg03313364	17	40440904	3.9e-06	<0.05	STAT5A	Island	0.112	0.037	*	9.1e-05	-0.00036	*	Increased sensitivity to AR	PCa	PMID: 23660011; PMID: 23026195; PMID: 19914392
cg09927651	17	1090869	4.1e-06	<0.05	ABR		0.789	-0.011		-0.00014	0.00039	*
cg10984178	1	946099	4.1e-06	<0.05		Shelf	0.856	0.00095		0.00013	-0.00029	*
cg12725706	15	93257525	4.3e-06	<0.05		Shore	0.192	-0.041	*	-5.6e-05	0.00024	*
cg23331010	3	98512690	5e-06	<0.05	ST3GAL6		0.905	0.024	*	3e-05	-0.00013	*
cg08972357	5	75009014	5.1e-06	<0.05	C5orf37	Shelf	0.837	0.026	*	0.0001	-0.00031	*
cg04028224	17	72733172	5.4e-06	<0.05	RAB37	Island	0.167	-0.038	*	-0.00012	0.00042	*	Disrupted metastasis and tumor angiogenesis suppression	Lung cancer, ESCC	PMID: 28151721
cg00531453	7	123673926	5.6e-06	<0.05	TMEM229A	Shore	0.551	-0.02		-0.00054	0.00079	*
cg09577144	17	76573499	6.1e-06	<0.05	DNAH17		0.685	-0.0035		0.00023	-0.0005	*
cg11474701	11	121193898	6.3e-06	<0.05			0.248	0.038	*	-8.5e-05	0.00025
cg01382502	16	22252504	6.8e-06	<0.2	EEF2K		0.112	0.03	*	0.00015	-0.00042	*
cg19752094	11	76381800	7.1e-06	<0.2	LRRC32	Island	0.282	-0.054	*	-2.2e-05	0.00029	*
cg00762397	1	203454010	7.1e-06	<0.2	PRELP	Shore	0.805	-0.0042		0.00017	-0.00039	*
cg22681190	1	21862932	7.5e-06	<0.2	ALPL		0.785	-0.043	*	-0.00014	0.00047	*
cg08927145	16	86321899	7.6e-06	<0.2		Shore	0.17	0.047	*	-0.00015	0.00034
cg25414370	22	50483351	7.7e-06	<0.2	TTLL8	Island	0.107	0.03	*	0.00011	-0.0003	*
cg06742469	16	11327370	8.7e-06	<0.2		Shore	0.127	0.021	*	9.9e-05	-0.00041	*
cg04460567	1	24193498	9.7e-06	<0.2	FUCA1	Shore	0.846	0.00037		-0.00022	0.00035	*
cg01899624	5	81082946	1e-05	<0.2			0.731	0.036	*	-9.9e-05	4.9e-05
cg17866692	12	110228049	1e-05	<0.2	TRPV4		0.673	-0.0077		0.00016	-0.00036	*
cg26838787	12	132842005	1.1e-05	<0.2	GALNT9	Shore	0.877	-0.033	*	-6e-05	0.00018
cg20743933	1	33647933	1.1e-05	<0.2	TRIM62	Shore	0.128	-0.0084		-0.0001	0.00058	*
cg00301159	3	157260788	1.2e-05	<0.2	C3orf55	Island	0.249	0.039	*	0.00016	-0.00055	*
cg14786790	4	89766654	1.2e-05	<0.2	FAM13A		0.498	0.05	*	5.1e-05	9.3e-05
cg05877550	16	85369038	1.2e-05	<0.2			0.607	-0.1	*	-0.00011	0.00092	*
cg24642825	15	89248793	1.2e-05	<0.2			0.274	-0.047	*	6.1e-05	8.8e-05
cg26907842	9	37036052	1.2e-05	<0.2		Island	0.193	0.041	*	0.0001	-0.0003	*
cg02389323	16	88786976	1.3e-05	<0.2	FAM38A	Shore	0.862	0.021	*	6.2e-05	-8.9e-05
cg01552504	16	50188903	1.3e-05	<0.2	PAPD5		0.809	-0.03	*	-0.00017	0.00036	*
cg20797699	17	61776851	1.4e-05	<0.2	LIMD2	Shore	0.192	-0.031	*	-0.00014	0.00025	*
cg11124130	2	119067579	1.4e-05	<0.2			0.159	0.045	*	-1.1e-05	-0.00029	*
cg11401159	5	6759129	1.4e-05	<0.2		Shelf	0.822	0.035	*	5.5e-05	-0.00025	*
cg02039987	2	157291262	1.5e-05	<0.2	GPD2	Shore	0.458	-0.016		-0.00034	0.00067	*
cg18031221	5	87441287	1.5e-05	<0.2		Shelf	0.285	0.038	*	-0.00024	0.00019
cg16322565	3	119526221	1.5e-05	<0.2	NR1I2	Shelf	0.636	-0.017	*	0.00018	-0.00032	*
cg16858211	7	36765349	1.6e-05	<0.2	AOAH		0.444	-0.016		-0.00039	0.00076	*
cg01902758	11	8816428	1.6e-05	<0.2	ST5		0.345	0.036	*	-4.1e-05	9.9e-05
cg26993105	7	152457606	1.7e-05	<0.2	ACTR3B	Shore	0.348	-0.038	*	0.00012	-0.00044	*
cg14274989	2	119606302	1.7e-05	<0.2	EN1	Island	0.229	0.04	*	-6.3e-05	0.00018
cg02463253	17	27369851	1.7e-05	<0.2	PIPOX		0.178	0.043	*	7.7e-05	-0.00027	*
cg26672104	14	52327433	1.8e-05	<0.2	GNG2		0.182	-0.03	*	-0.00021	0.00039	*
cg10283737	1	112533749	1.8e-05	<0.2		Island	0.079	0.019	*	-4.4e-06	-6.6e-05
cg26334518	17	19807272	1.8e-05	<0.2			0.915	-0.0027		-0.00016	0.00024	*
cg01288184	18	20811408	1.9e-05	<0.2	CABLES1		0.08	0.037	*	0.00011	-0.00033	*
cg13904199	9	86594091	1.9e-05	<0.2	HNRNPK	Shore	0.138	-0.01		-4.8e-05	0.00044	*
cg25050859	14	24907497	2e-05	<0.2	KHNYN	Shelf	0.754	-0.019		-0.0002	0.00058	*
cg00005297	4	3465367	2.1e-05	<0.2	DOK7	Island	0.199	0.054	*	0.00038	-0.00088	*
cg20239391	20	45030732	2.1e-05	<0.2	ELMO2	Shelf	0.752	-0.035	*	0.00011	-7.5e-05
cg27337194	6	32036911	2.1e-05	<0.2	TNXB		0.9	-0.023	*	1.6e-05	1e-05
cg16497661	14	103986332	2.3e-05	<0.2	CKB	Shore	0.921	-0.04	*	-4.7e-05	0.00031	*
cg26577252	15	99212332	2.3e-05	<0.2	IGF1R		0.168	0.034	*	-8.6e-05	6.6e-05
cg14180030	9	123475675	2.3e-05	<0.2	MEGF9	Shore	0.155	0.034	*	0.00026	-0.00059	*
cg10110474	17	31150194	2.3e-05	<0.2	MYO1D	Shore	0.177	0.057	*	-2.6e-05	-0.00021
cg01014224	13	44379186	2.3e-05	<0.2			0.862	-0.032	*	2.7e-05	0.0001
cg18009359	8	112636625	2.3e-05	<0.2			0.739	0.028	*	0.0003	-0.00042	*
cg07051960	19	42499619	2.4e-05	<0.2	ATP1A3	Shore	0.787	-0.0055		0.00023	-0.00041	*
cg19866594	8	73848457	2.4e-05	<0.2	KCNB2		0.741	0.046	*	0.00021	-0.00037	*
cg26038315	12	34464817	2.4e-05	<0.2			0.817	-0.0018		0.00014	-0.0005	*
cg27287305	4	100576985	2.4e-05	<0.2		Shelf	0.793	-0.0077		-0.00024	0.00049	*
cg00402172	16	68118754	2.4e-05	<0.2	NFATC3	Island	0.236	0.04	*	-0.00011	-0.00024	*
cg05870820	4	154142712	2.4e-05	<0.2	TRIM2	Shore	0.846	0.028	*	0.00012	-0.00032	*
cg17186163	10	45474317	2.5e-05	<0.2	C10orf10		0.271	0.024	*	-0.00017	0.00023
cg26476755	11	66743796	2.5e-05	<0.2	C11orf86		0.833	-0.039	*	-0.0001	0.00022	*
cg09025501	16	88717472	2.5e-05	<0.2	CYBA	Island	0.324	0.062	*	0.00044	-0.00088	*
cg07050616	10	102996197	2.5e-05	<0.2	FLJ41350	Island	0.117	-0.0089		-0.0001	0.00039	*
cg23392162	10	48417321	2.5e-05	<0.2	GDF2	Shelf	0.89	-0.0065		6.7e-05	-0.0002	*
cg09369221	12	52406784	2.6e-05	<0.2	GRASP	Shore	0.906	0.0097	*	8.8e-05	-0.00029	*
cg00948524	17	29297757	2.6e-05	<0.2	RNF135	Shore	0.105	0.029	*	0.00026	-0.00063	*
cg07309764	7	79763914	2.7e-05	<0.2	GNAI1	Island	0.101	0.00039		0.00019	-0.0003	*
cg00535514	19	44205563	2.7e-05	<0.2		Shore	0.165	0.0035		0.00049	-0.00054	*
cg13572592	12	46776425	2.7e-05	<0.2		Shore	0.811	0.012		-0.00028	0.0003	*
cg16926445	1	3064439	2.7e-05	<0.2	PRDM16		0.807	0.0015		0.00015	-0.00045	*
cg10677246	6	17281483	2.7e-05	<0.2	RBM24	Island	0.149	-0.0068		-9e-05	0.00038	*
cg18433784	21	48025155	2.7e-05	<0.2	S100B		0.15	0.015	*	-0.0001	0.00013
cg15466952	1	65889855	2.8e-05	<0.2	LEPR	Shelf	0.381	0.064	*	3.3e-05	-0.00028
cg07729059	15	96884100	2.8e-05	<0.2		Island	0.305	-0.0034		0.0001	-0.00056	*
cg14207589	1	225865327	2.8e-05	<0.2		Island	0.283	0.023	*	-0.0001	0.00033	*
cg03499808	11	73020459	2.9e-05	<0.2	ARHGEF17	Island	0.554	-0.16	*	-9.9e-06	0.00099	*
cg09940476	16	89224261	3e-05	<0.2	C16orf81	Shore	0.624	0.036	*	6.8e-05	-0.00013
cg08863440	2	171680337	3e-05	<0.2	GAD1	Island	0.253	0.021		0.00066	-0.00087	*
cg01927162	4	154428455	3e-05	<0.2	KIAA0922		0.72	0.037	*	0.00024	-0.00049	*
cg23290456	19	1859341	3e-05	<0.2	KLF16	Shore	0.359	0.022	*	0.00013	-0.00034	*
cg11938738	6	134999799	3e-05	<0.2			0.833	0.011		-0.00013	0.00027	*
cg20620326	6	28715664	3e-05	<0.2			0.459	-0.0019		-0.00044	0.001	*
cg26608693	1	14027581	3e-05	<0.2	PRDM2	Shore	0.303	-0.028		0.00055	-0.00061	*
cg00876273	10	94452311	3.1e-05	<0.2	HHEX	Island	0.13	0.015		-0.00018	0.00031	*
cg03432085	11	126521914	3.1e-05	<0.2	KIRREL3		0.805	0.034	*	-1.3e-05	-0.00021	*
cg16497413	12	109992779	3.1e-05	<0.2	MMAB		0.833	-0.018	*	-0.00019	0.00039	*
cg27370229	16	89226999	3.2e-05	<0.2	C16orf81	Shore	0.54	0.043	*	-6.7e-05	0.00028
cg00016360	7	21582131	3.2e-05	<0.2	DNAH11	Shore	0.904	-0.0039		-0.00018	0.00037	*
cg00108617	7	57324417	3.2e-05	<0.2		Island	0.825	0.037	*	4.6e-05	-0.00021	*
cg18583697	8	35576222	3.3e-05	<0.2	UNC5D		0.652	0.019		0.00037	-0.00072	*
cg18597421	21	27540728	3.4e-05	<0.2	APP	Shore	0.725	-0.0069		0.00013	-0.00034	*
cg01023203	3	181429233	3.4e-05	<0.2	SOX2OT	Shore	0.223	-0.015		0.00029	-0.00059	*
cg01482958	1	85357136	3.6e-05	<0.2	LPAR3	Shore	0.888	-0.019	*	-8.4e-05	0.00036	*
cg25703361	15	69076089	3.7e-05	<0.2	ANP32A		0.118	-0.0087		-0.00011	0.00045	*
cg20559816	18	76985797	3.7e-05	<0.2	ATP9B	Island	0.877	0.0076	*	-7.1e-05	7.9e-05
cg12927641	6	109611667	3.7e-05	<0.2		Island	0.914	0.016		0.00015	-0.00033	*
cg08604505	8	128932775	3.7e-05	<0.2	PVT1		0.89	-0.025	*	-2e-06	0.00028	*
cg16553297	4	123632037	3.8e-05	<0.2			0.646	0.051	*	-0.00012	-0.00011
cg26160460	1	198828209	4.1e-05	<0.2	MIR181B1		0.771	0.026	*	0.00033	-0.00051	*
cg03524147	10	119138665	4.1e-05	<0.2		Shelf	0.434	0.0044		-0.00045	0.0008	*
cg13417862	17	855238	4.1e-05	<0.2	NXN		0.049	0.022	*	4.5e-05	-9e-05
cg05552035	8	37699239	4.2e-05	<0.2	GPR124	Island	0.284	0.091	*	0.00023	-0.0007	*
cg25582488	14	69095171	4.2e-05	<0.2		Island	0.612	0.051	*	0.00045	-0.001	*
cg02030542	16	70722454	4.2e-05	<0.2	VAC14	Shelf	0.534	0.019	*	-0.00015	0.00032	*
cg04215968	2	220253068	4.3e-05	<0.2	DNPEP	Shore	0.318	0.011		-0.00021	0.00031	*
cg08306084	6	33248546	4.3e-05	<0.2	WDR46	Shelf	0.73	-0.032	*	-0.00018	0.00041	*
cg24641773	20	1374086	4.4e-05	<0.2	FKBP1A	Shore	0.277	-0.0076		0.00027	-0.00052	*
cg02128417	5	34672436	4.4e-05	<0.2	RAI14		0.843	0.017	*	6.9e-05	-0.00028	*
cg09501687	5	150169781	4.6e-05	<0.2	C5orf62		0.155	0.048	*	7.3e-05	-0.00028	*
cg01544903	16	56697229	4.7e-05	<0.2		Island	0.063	0.027	*	0.00029	-0.00062	*
cg11046602	17	47695458	4.7e-05	<0.2	SPOP		0.588	0.019		-0.00023	0.00037	*
cg25929046	22	23409066	4.8e-05	<0.2	RTDR1	Shelf	0.735	-0.036	*	-8.7e-05	0.00025	*
cg06615840	3	187416991	4.9e-05	<0.2	RTP2	Shore	0.74	0.0072		0.00036	-0.00069	*
cg12486493	15	99417267	5e-05	<0.2	IGF1R		0.405	0.032	*	8.6e-06	-0.00014
cg04473405	12	52762005	5e-05	<0.2	KRT85	Shore	0.765	-0.012		0.00018	-0.00028	*
cg13572309	12	16758267	5e-05	<0.2	LMO3		0.262	0.044	*	0.00031	-0.001	*
cg23618440	6	48036605	5.1e-05	<0.2	C6orf138	Shore	0.287	-0.058	*	0.00019	-6.1e-05
cg27407423	10	5851600	5.1e-05	<0.2	GDI2	Shelf	0.68	-0.031	*	-7.4e-05	-0.00014
cg01171212	2	177036436	5.1e-05	<0.2	HOXD3	Island	0.407	-0.0032		5.9e-05	-0.00025	*
cg05722931	5	169008622	5.1e-05	<0.2		Shore	0.708	-0.044	*	-0.00022	0.00043	*
cg14706455	3	124776038	5.2e-05	<0.2	HEG1	Shore	0.778	-0.004		0.00018	-0.00044	*
cg16283362	7	156795914	5.2e-05	<0.2		Island	0.258	0.05	*	-0.0001	-0.00017
cg13975523	13	43148684	5.2e-05	<0.2	TNFSF11	Island	0.078	0.023	*	-1e-05	-0.0002	*
cg00544436	6	34203564	5.3e-05	<0.2	HMGA1	Island	0.173	0.027	*	0.00024	-0.00048	*
cg00005040	6	127439206	5.3e-05	<0.2	RSPO3	Shore	0.193	-0.036	*	0.0001	4.3e-05
cg27073431	2	47404636	5.4e-05	<0.2	CALM2	Shore	0.646	-0.027	*	0.00013	-0.00041	*
cg24675770	2	33622300	5.4e-05	<0.2	LTBP1		0.898	-0.0043		-7.3e-05	0.00022	*
cg15675123	5	12623177	5.5e-05	<0.2			0.833	0.0012		-0.00014	0.00031	*
cg25815298	6	155703360	5.6e-05	<0.2			0.792	0.04	*	0.00023	-0.00042	*
cg12989217	12	26379648	5.6e-05	<0.2	SSPN		0.128	-0.042	*	-8.7e-05	0.00031	*
cg27640763	12	91503109	5.7e-05	<0.2	LUM		0.207	-0.045	*	-0.00022	0.00057	*
cg09871008	6	32798179	5.7e-05	<0.2	TAP2		0.924	0.00075		6.2e-05	-0.00021	*
cg16888658	2	25142117	5.8e-05	<0.2	ADCY3	Shore	0.529	-0.023		0.00019	-0.00078	*
cg24129222	2	74643251	5.8e-05	<0.2	C2orf81	Island	0.617	0.096	*	0.00045	-0.00078	*
cg07617283	7	127913660	5.8e-05	<0.2		Shore	0.527	0.073	*	0.0003	-0.0005	*
cg17178175	2	178109973	5.9e-05	<0.2	NFE2L2		0.484	0.042	*	-0.00022	0.00027
cg04452362	13	114061812	6e-05	<0.2			0.562	-0.034	*	-1.7e-05	-0.0002
cg27653901	12	124832755	6e-05	<0.2	NCOR2	Shore	0.912	-0.024	*	-3.7e-05	0.00017	*
cg13606889	11	121335457	6e-05	<0.2	SORL1		0.205	0.012		-0.00019	0.00036	*
cg22766145	8	65492528	6.1e-05	<0.2	BHLHE22	Shore	0.129	0.044	*	9.8e-05	-0.0004	*
cg23727813	12	6803244	6.1e-05	<0.2	C12orf53		0.768	-0.038	*	-0.00025	0.00045	*
cg03751944	19	1081936	6.1e-05	<0.2	HMHA1	Island	0.742	-0.011		-0.00019	0.00052	*
cg19999212	3	131096964	6.1e-05	<0.2		Shelf	0.691	0.035	*	-0.00015	0.00023
cg07108206	2	232791814	6.1e-05	<0.2	NPPC	Island	0.155	-0.074	*	-0.00021	0.00035
cg18737081	10	80999807	6.1e-05	<0.2	ZMIZ1	Shelf	0.717	-0.0063		0.00024	-0.00063	*
cg15863827	10	79363895	6.2e-05	<0.2	KCNMA1		0.498	-0.011		0.00025	-0.00042	*
cg10170269	20	62256006	6.3e-05	<0.2	GMEB2	Shore	0.75	0.034	*	-4.2e-05	-3.4e-07
cg02015582	6	32918479	6.3e-05	<0.2	HLA-DMA		0.826	-0.024	*	2.1e-05	0.00025	*
cg02147681	17	17603837	6.3e-05	<0.2	RAI1	Island	0.333	0.041	*	0.00019	-0.0011	*
cg03607680	1	48450020	6.5e-05	<0.2		Island	0.149	0.057	*	0.00051	-0.00098	*
cg16689594	11	1226924	6.7e-05	<0.2		Shore	0.771	0.035	*	0.00021	-0.00047	*
cg20253872	1	110166571	6.8e-05	<0.2	AMPD2	Shelf	0.297	0.025	*	-1e-06	0.00021
cg07801448	4	40356774	6.8e-05	<0.2	CHRNA9		0.789	-0.018	*	0.00011	-0.00015
cg26176717	17	45364717	6.8e-05	<0.2	ITGB3		0.819	-0.0083		0.0002	-0.00027	*
cg20255231	8	1999014	6.8e-05	<0.2	MYOM2		0.91	-0.011	*	3.7e-05	-0.00013
cg06879394	6	13274151	6.8e-05	<0.2	PHACTR1		0.134	0.022	*	0.00014	-0.00061	*
cg08132837	14	60975811	6.9e-05	<0.2	SIX6	Island	0.18	-0.024	*	5.2e-06	-4.3e-05
cg05316785	7	54605863	7.1e-05	<0.2		Shelf	0.585	0.053	*	6.8e-05	-0.00015
cg07341290	16	55224133	7.1e-05	<0.2			0.154	0.063	*	0.00013	-0.00019
cg06998119	5	51813680	7.3e-05	<0.2			0.874	0.015	*	0.00016	-0.00022	*
cg14109388	4	25940163	7.4e-05	<0.2			0.804	0.0047		0.00011	-0.00037	*
cg19409187	6	123109903	7.5e-05	<0.2	SMPDL3A	Shore	0.43	-0.027	*	-0.00041	0.00062	*
cg02586212	1	192544902	7.6e-05	<0.2	RGS1		0.424	0.17	*	1.1e-05	0.00014
cg26999505	19	10691861	7.8e-05	<0.2	AP1M2	Island	0.154	-0.018		0.00017	-0.00032	*
cg26334166	20	61950840	7.8e-05	<0.2	COL20A1	Shore	0.747	-0.015		0.00015	-0.00036	*
cg01660934	16	68269041	7.8e-05	<0.2	ESRP2	Island	0.937	-0.017	*	6e-06	9.2e-05
cg17479840	17	9863061	7.8e-05	<0.2	GAS7		0.328	0.0082		-0.00011	0.00036	*
cg26155556	1	240776162	7.8e-05	<0.2	GREM2		0.704	0.028	*	-0.00024	0.00042	*
cg26979504	10	94451518	7.8e-05	<0.2	HHEX	Island	0.159	0.023	*	2.7e-06	0.00039	*
cg25162927	12	45736875	7.9e-05	<0.2	ANO6		0.856	0.029	*	-3.7e-05	-0.00015
cg12925747	4	185905209	7.9e-05	<0.2			0.113	-0.019	*	4.8e-07	2.1e-05
cg11758932	11	109964976	7.9e-05	<0.2	ZC3H12C	Shore	0.072	0.0096	*	-2.5e-05	0.00016	*
cg01861664	19	13006190	8e-05	<0.2	GCDH	Shelf	0.61	0.0044		-0.00019	0.00025	*
cg05046377	11	4927915	8e-05	<0.2	OR51A7		0.636	0.031	*	0.00032	-0.00059	*
cg20296493	8	124219725	8.1e-05	<0.2	FAM83A	Island	0.578	0.067	*	-3.1e-05	8e-05
cg06840246	1	15283326	8.1e-05	<0.2	KIAA1026		0.794	0.0071		-0.00024	0.00039	*
cg21803113	4	144480338	8.1e-05	<0.2	LOC441046	Shore	0.277	-0.086	*	-0.00014	0.00066	*
cg19567735	7	57713841	8.1e-05	<0.2			0.731	0.036	*	7.8e-05	-0.00021
cg22981628	17	27332559	8.1e-05	<0.2	SEZ6	Island	0.284	-0.029	*	-4.4e-07	4.2e-05
cg22341471	12	123451323	8.2e-05	<0.2	ABCB9	Shore	0.558	-0.025	*	4e-05	-0.00015
cg24814293	11	59318534	8.2e-05	<0.2			0.178	-0.007		-0.00011	0.00026	*
cg25579204	13	112885950	8.2e-05	<0.2			0.805	0.038	*	-6e-06	-0.00031	*
cg03424345	12	130411272	8.3e-05	<0.2			0.643	0.026	*	0.00012	-0.00052	*
cg11789421	10	103543213	8.3e-05	<0.2	NPM3	Island	0.182	-0.03	*	-0.00038	0.00064	*
cg19606731	13	41496012	8.3e-05	<0.2	SUGT1L1	Island	0.172	-0.017	*	-0.00023	0.00037	*
cg25522181	2	96933283	8.4e-05	<0.2	CIAO1	Shore	0.793	-0.016	*	5.7e-05	-0.00019
cg12791877	10	464452	8.4e-05	<0.2	DIP2C	Shore	0.826	-0.0013		-0.0003	0.00048	*
cg25598086	14	65006720	8.4e-05	<0.2	HSPA2	Shore	0.136	-0.041	*	-0.00024	0.00055	*
cg07588439	2	198571554	8.5e-05	<0.2	MARS2	Shore	0.8	-0.013		0.00018	-0.00041	*
cg12555907	18	74845422	8.6e-05	<0.2	MBP	Island	0.72	-0.06	*	-1.3e-05	0.00021
cg02466588	17	47563766	8.6e-05	<0.2			0.16	-0.032	*	-9.3e-05	0.00081	*
cg18482690	5	4511582	8.8e-05	<0.2			0.718	0.047	*	0.0002	-0.00052	*
cg02864240	12	45582569	8.8e-05	<0.2	PLEKHA9		0.659	0.027	*	-6.6e-06	9e-06
cg07081725	4	70626329	8.8e-05	<0.2	SULT1B1		0.224	-0.029	*	-0.00034	0.00071	*
cg04038019	20	61508588	8.9e-05	<0.2		Island	0.816	-0.036	*	8.1e-05	-0.00012
cg14457782	17	40937362	8.9e-05	<0.2	WNK4	Island	0.114	0.022	*	-0.0001	0.00033	*
cg08923054	8	41654455	9e-05	<0.2	ANK1	Shore	0.801	0.035	*	-4.1e-05	-0.00022	*
cg01290710	19	40889978	9e-05	<0.2	HIPK4	Island	0.762	0.032	*	-7e-05	0.00018
cg06830450	12	58121004	9e-05	<0.2	LOC100130776	Island	0.908	-0.031	*	-0.00017	0.00039	*
cg14447152	9	140153393	9.1e-05	<0.2	COBRA1	Shelf	0.685	-0.00066		-8.3e-05	0.00019	*
cg14937036	3	139109058	9.1e-05	<0.2	COPB2	Shore	0.058	0.006		0.00013	-0.00021	*
cg06343212	7	84815881	9.1e-05	<0.2		Island	0.112	0.01	*	9.9e-05	-0.00031	*
cg16084872	21	42879074	9.1e-05	<0.2	TMPRSS2	Island	0.312	-0.006		0.00033	-0.00077	*
cg11303839	7	75405967	9.2e-05	<0.2	CCL26		0.255	-0.035	*	-0.00022	0.00065	*
cg04070847	3	112693867	9.2e-05	<0.2	CD200R1		0.306	-0.049	*	-0.00026	0.00061	*
cg01765111	1	37784244	9.2e-05	<0.2		Island	0.282	0.1	*	0.00041	-0.0009	*
cg10804974	5	140603270	9.2e-05	<0.2	PCDHB14	Shore	0.749	-0.057	*	-0.00018	0.00014
cg16690845	10	134404914	9.4e-05	<0.2	INPP5A		0.682	0.0069		-0.00012	0.00058	*
cg15768443	6	30652347	9.4e-05	<0.2	KIAA1949	Shelf	0.343	0.0065		-0.00019	0.00024	*
cg14689490	7	158210489	9.4e-05	<0.2	PTPRN2		0.558	0.016	*	2.6e-05	9.1e-05
cg21643649	19	7688301	9.4e-05	<0.2	XAB2	Shore	0.723	-0.0099		-0.00024	0.00048	*
cg05418395	2	58689455	9.5e-05	<0.2			0.77	0.039	*	6.6e-05	-3.1e-06
cg08213098	1	35395837	9.5e-05	<0.2		Island	0.14	-0.024	*	-7.7e-05	9.9e-05
cg06604206	5	167912465	9.5e-05	<0.2	RARS	Shore	0.906	-0.019	*	-6.3e-05	0.00018	*
cg13518031	3	189506825	9.5e-05	<0.2	TP63		0.88	0.0077		0.00021	-0.00034	*
cg00464520	10	118903060	9.6e-05	<0.2		Shelf	0.886	-0.04	*	-2.6e-05	0.00022	*
cg20664247	1	2345475	9.6e-05	<0.2	PEX10	Shore	0.76	-0.046	*	-0.00026	0.00038	*
cg26972554	5	126409454	9.7e-05	<0.2	FLJ44606	Shore	0.587	-0.0081		0.00022	-0.00048	*
cg15833657	7	139207971	9.8e-05	<0.2	CLEC2L	Shore	0.209	0.051	*	-8.5e-05	0.00061	*
cg08446111	16	48279428	9.8e-05	<0.2	LONP2	Shore	0.728	-0.024	*	-0.00018	0.00039	*
cg10505761	2	73339389	9.8e-05	<0.2	RAB11FIP5	Island	0.167	0.031	*	0.00017	-0.00052	*
cg06118116	2	228336171	9.9e-05	<0.2	AGFG1	Shore	0.826	-0.026	*	-2.7e-05	-8.4e-05
cg00498163	2	242821619	9.9e-05	<0.2		Shore	0.74	-0.0083		-0.00018	0.00054	*
cg02633924	17	75315563	0.0001	<0.2	SEPT9		0.118	0.041	*	0.00012	-0.0003	*
cg00472445	6	101329307	0.0001	<0.2	ASCC3	Island	0.442	-0.0071		-0.00043	0.00062	*
cg09334514	1	236686671	0.0001	<0.2	LGALS8	Shore	0.535	0.08	*	0.00026	-0.00034
cg17340391	3	128151578	0.0001	<0.2		Shore	0.341	-0.066	*	-0.00036	0.00091	*
cg08920773	3	38207524	0.0001	<0.2	OXSR1	Island	0.386	-0.029	*	-0.00032	0.00062	*
cg21821315	12	54959611	0.0001	<0.2	PDE1B		0.861	-0.021	*	-6.2e-05	0.0002	*
cg01016851	1	145039741	0.0001	<0.2	PDE4DIP	Island	0.136	0.0032		7.3e-05	-0.00018	*
cg26959358	8	93107604	0.0001	<0.2	RUNX1T1		0.328	-0.05	*	8.2e-07	9.8e-05
cg19827346	6	152702387	0.0001	<0.2	SYNE1		0.821	-0.003		-9.3e-05	0.00038	*
cg25124300	2	31607761	0.0001	<0.2	XDH		0.479	0.035	*	-0.00014	0.00031
cg12811552	5	172410833	0.00011	<0.2	ATP6V0E1	Island	0.072	-0.013	*	2.3e-05	-2e-05
cg13558328	12	56109603	0.00011	<0.2	BLOC1S1	Shore	0.376	-0.06	*	2.7e-05	0.00033
cg23397909	7	921092	0.00011	<0.2	C7orf20	Shelf	0.944	-0.011	*	-3.3e-05	0.00019	*
cg12373084	9	12775700	0.00011	<0.2	C9orf150	Island	0.165	-0.037	*	-0.00016	6.7e-05
cg10809485	8	53456003	0.00011	<0.2	FAM150A		0.233	0.06	*	0.00019	-0.00025
cg24622007	12	132687376	0.00011	<0.2	GALNT9	Shore	0.774	0.038	*	0.00027	-0.0005	*
cg16682926	20	57411775	0.00011	<0.2	GNASAS	Shelf	0.841	-0.028	*	2.1e-05	-6.5e-05
cg05889266	1	59361647	0.00011	<0.2			0.584	0.019		-0.0003	0.00049	*
cg09502015	5	87441873	0.00011	<0.2			0.108	0.014		-0.00023	0.00024	*
cg23974194	14	57284319	0.00011	<0.2	OTX2OS1	Island	0.295	-0.03	*	-0.0002	0.00057	*
cg15065169	1	3241867	0.00011	<0.2	PRDM16	Shore	0.88	-0.0029		6.5e-05	-0.00022	*
cg23658354	12	15698695	0.00011	<0.2	PTPRO		0.653	0.069	*	4e-05	-0.00043	*
cg14120359	9	2018164	0.00011	<0.2	SMARCA2	Shore	0.126	-0.0079		-0.0002	0.00052	*
cg04057858	8	10383763	0.00011	<0.2	T-SP1		0.619	0.0016		0.00018	-0.00049	*
cg20870885	2	122043074	0.00011	<0.2	TFCP2L1	Island	0.354	-0.057	*	-0.00045	0.001	*
cg04214520	3	195615359	0.00011	<0.2	TNK2	Shore	0.85	-0.0013		-0.00036	0.00045	*
cg17901382	17	73514798	0.00011	<0.2	TSEN54	Shore	0.751	-0.051	*	-0.00031	0.00026
cg21010646	1	156548201	0.00011	<0.2	TTC24		0.693	0.011	*	-9.7e-05	0.00012
cg21552653	19	57079146	0.00011	<0.2	ZNF470	Island	0.289	-0.015		6.7e-05	-0.00024	*
cg14451276	7	36764019	0.00012	<0.2	AOAH		0.123	0.035	*	0.00024	-0.0005	*
cg11100795	5	77583915	0.00012	<0.2	AP3B1		0.51	0.026		-0.00013	0.00042	*
cg24513014	1	7210826	0.00012	<0.2	CAMTA1		0.743	-0.066	*	-0.00036	0.0008	*
cg27167221	1	7103111	0.00012	<0.2	CAMTA1		0.474	-0.032	*	-0.00046	0.00087	*
cg00133403	16	57212731	0.00012	<0.2	FAM192A		0.928	-0.018	*	-1.5e-05	6.8e-05
cg04287289	16	89883240	0.00012	<0.2	FANCA	Island	0.162	-0.027	*	-0.00016	0.0005	*
cg08070327	7	27184059	0.00012	<0.2	HOXA5	Island	0.917	-0.016		-0.00021	0.00044	*
cg03513643	8	145536188	0.00012	<0.2	HSF1		0.914	-0.004		7.2e-05	-0.00013	*
cg23656110	21	45232531	0.00012	<0.2	LOC284837		0.14	0.019	*	-0.00013	0.00016
cg24871540	19	50708705	0.00012	<0.2	MYH14	Island	0.377	-0.08	*	-0.00011	0.00025
cg01407447	13	77090294	0.00012	<0.2			0.863	-0.022	*	-6e-05	7.6e-05
cg01556275	1	59245597	0.00012	<0.2		Shore	0.791	-0.00041		-0.00012	0.00029	*
cg04640076	16	89151047	0.00012	<0.2		Shelf	0.684	-0.081	*	-0.00029	0.00069	*
cg06094588	3	42724640	0.00012	<0.2		Shelf	0.752	-0.024	*	-0.00023	0.00043	*
cg09034695	17	4272875	0.00012	<0.2		Shelf	0.892	-0.023	*	-0.0002	0.00024	*
cg11202887	13	112076016	0.00012	<0.2			0.57	0.059	*	0.00038	-0.00056	*
cg11664417	5	71883710	0.00012	<0.2			0.635	0.05	*	-0.00018	0.00047
cg11809162	1	2241792	0.00012	<0.2		Shelf	0.794	-0.036	*	-1.9e-05	4.5e-05
cg13038847	22	28073997	0.00012	<0.2		Island	0.823	-0.02	*	-0.0002	0.00047	*
cg22793897	2	134513565	0.00012	<0.2			0.711	-0.00028		-0.0002	0.00059	*
cg24520871	10	73074265	0.00012	<0.2			0.067	0.0096	*	-2.3e-05	2e-05
cg05380885	1	183274661	0.00012	<0.2	NMNAT2		0.796	0.034	*	5.3e-05	-0.00034	*
cg14248981	6	31937066	0.00012	<0.2	SKIV2L	Shelf	0.855	0.0083		0.00022	-0.00053	*
cg08124923	13	36789908	0.00012	<0.2	SOHLH2	Shore	0.833	0.03	*	6.5e-05	-0.00029	*
cg15127832	4	184930913	0.00012	<0.2	STOX2		0.849	0.031	*	7.7e-05	-0.00027	*
cg03257294	1	222763046	0.00012	<0.2	TAF1A	Island	0.12	-0.021	*	4.9e-06	9.1e-05
cg17175136	7	98608857	0.00012	<0.2	TRRAP	Shore	0.931	0.018	*	-6.6e-06	-5.2e-05
cg06348423	20	43753652	0.00012	<0.2	WFDC12		0.893	0.0049		9e-05	-0.00044	*
cg26509211	10	60273661	0.00013	<0.2	BICC1	Shore	0.267	-0.029	*	-9.9e-05	0.00027	*
cg25006249	20	259898	0.00013	<0.2	C20orf96	Island	0.329	0.16	*	0.00049	-0.00082	*
cg02550950	2	197122104	0.00013	<0.2	HECW2		0.402	0.14	*	0.00025	-0.00061
cg03033688	16	22824489	0.00013	<0.2	HS3ST2	Shore	0.225	0.071	*	0.00031	-0.00049	*
cg00640376	6	33173927	0.00013	<0.2	HSD17B8	Shore	0.836	0.01		-8.9e-05	0.0002	*
cg01132020	16	85968919	0.00013	<0.2			0.903	0.018	*	5.2e-06	-8.6e-05
cg03455736	22	49882497	0.00013	<0.2		Shore	0.779	0.037	*	5.2e-05	-0.00016
cg07876340	5	143150957	0.00013	<0.2			0.839	-0.025	*	-9.7e-05	0.00028	*
cg09364122	1	942198	0.00013	<0.2			0.85	0.0055		-9.4e-05	0.00022	*
cg17402294	10	93058376	0.00013	<0.2			0.307	-0.07	*	2.9e-06	0.00036	*
cg25683575	2	233327189	0.00013	<0.2		Shelf	0.86	-0.026	*	1.6e-05	8.3e-05
cg07706114	8	27516827	0.00013	<0.2	SCARA3		0.746	0.022	*	-5.7e-05	3.7e-05
cg16033633	13	100624855	0.00013	<0.2	ZIC5	Shore	0.176	0.027	*	0.00025	-0.00052	*
cg23574427	4	122746245	0.00014	<0.2	BBS7	Shore	0.376	0.026		-0.00059	0.0011	*
cg00042611	16	57760115	0.00014	<0.2	CCDC135	Island	0.908	-0.00088		4.6e-05	-8.5e-05	*
cg23683497	1	203192517	0.00014	<0.2	CHIT1		0.783	0.019	*	0.00032	-0.00052	*
cg00777315	13	95133339	0.00014	<0.2	DCT		0.691	-0.011		8e-05	-0.00033	*
cg08878323	7	96652464	0.00014	<0.2	DLX5	Shore	0.229	0.00065		-0.00016	0.00038	*
cg09247319	21	45683302	0.00014	<0.2	DNMT3L		0.892	-0.019	*	6.9e-05	-2.9e-05
cg06111374	12	14109584	0.00014	<0.2	GRIN2B		0.796	0.041	*	0.00017	-0.00043	*
cg12480390	11	126796374	0.00014	<0.2	KIRREL3		0.636	0.023	*	0.00026	-0.00053	*
cg03845962	3	65880266	0.00014	<0.2	MAGI1		0.721	0.047	*	-2.7e-05	-0.0003	*
cg06233135	6	42450495	0.00014	<0.2			0.906	0.01		0.00011	-0.00033	*
cg08461949	19	52104632	0.00014	<0.2		Island	0.526	-0.045	*	0.00012	-0.00028
cg08493899	6	13874120	0.00014	<0.2		Island	0.09	0.029	*	0.0002	-0.00028	*
cg16929427	6	1578078	0.00014	<0.2			0.957	-0.018	*	-4.8e-06	0.00011
cg23501005	3	195870009	0.00014	<0.2			0.782	0.036	*	3.8e-05	-0.00018
cg02899870	20	32263104	0.00014	<0.2	NECAB3	Shore	0.845	-0.011		0.00021	-0.00034	*
cg05969306	13	48612661	0.00014	<0.2	NUDT15	Shore	0.806	-0.026	*	0.00012	-0.00032	*
cg16553527	16	67313031	0.00014	<0.2	PLEKHG4	Island	0.182	-0.041	*	-0.00021	0.00063	*
cg07888347	17	4488345	0.00014	<0.2	SMTNL2	Island	0.487	-0.076	*	7.4e-05	-0.00017
cg13780718	20	44513768	0.00014	<0.2	ZSWIM1		0.269	0.034	*	-0.00017	0.00037	*
cg07826326	1	32222151	0.00015	<0.2	BAI2	Shore	0.815	0.02	*	-0.00013	0.00014
cg12459718	17	8129997	0.00015	<0.2	C17orf68	Shelf	0.419	0.048		0.00064	-0.0014	*
cg09685472	16	81527427	0.00015	<0.2	CMIP		0.404	0.047	*	2.8e-05	-0.00018
cg14013695	7	27184176	0.00015	<0.2	HOXA5	Island	0.8	-0.0083		-0.00018	0.00028	*
cg21035222	14	65006281	0.00015	<0.2	HSPA2	Shore	0.167	-0.05	*	-7.5e-05	0.00032	*
cg09260951	22	39096513	0.00015	<0.2	JOSD1	Island	0.334	-0.019	*	-0.00018	0.0004	*
cg27314336	14	104582743	0.00015	<0.2	MIR203	Shore	0.197	0.031	*	-7e-05	0.0002
cg25439883	6	26323563	0.00015	<0.2			0.824	-0.038	*	-9.8e-05	0.00041	*
cg25653641	6	28601312	0.00015	<0.2		Shore	0.528	0.036		-0.00033	0.00044	*
cg25721832	3	81913557	0.00015	<0.2			0.856	-0.028	*	-2.4e-06	0.00022	*
cg23421128	12	117797635	0.00015	<0.2	NOS1	Shore	0.166	0.05	*	-6.8e-05	6.5e-05
cg12845808	5	141338604	0.00015	<0.2	PCDH12		0.473	0.036	*	-5.5e-05	-6.6e-05
cg05093429	14	96129574	0.00015	<0.2	TCL6		0.72	-0.027	*	-0.00022	0.0005	*
cg22159528	19	44039727	0.00015	<0.2	ZNF575	Island	0.69	-0.049	*	3.7e-05	-0.0002
cg16038327	1	154322245	0.00016	<0.2	ATP8B2		0.92	-0.0093	*	-9.3e-05	0.00023	*
cg17774058	20	6748719	0.00016	<0.2	BMP2	Island	0.194	-0.0095		1.1e-05	-0.00018	*
cg15891422	17	43045386	0.00016	<0.2	C1QL1	Island	0.136	-0.032	*	8.5e-05	0.00018	*
cg17694593	8	86290432	0.00016	<0.2	CA1		0.594	0.035	*	0.00024	-0.00031	*
cg18440523	21	42690652	0.00016	<0.2	FAM3B	Shore	0.808	-0.02	*	7.5e-05	-2e-05
cg19779370	5	108084990	0.00016	<0.2	FER	Island	0.261	0.0097		-8.4e-05	0.00032	*
cg01833470	1	36270210	0.00016	<0.2		Shelf	0.137	0.042	*	-8.7e-05	-0.0002
cg03323462	17	35300677	0.00016	<0.2		Island	0.296	0.063	*	0.00036	-0.00098	*
cg07918933	6	72051803	0.00016	<0.2			0.465	0.049	*	2.6e-05	-3.9e-05
cg12659883	1	119543057	0.00016	<0.2		Island	0.251	0.019		-0.00022	0.0005	*
cg20103150	4	170236265	0.00016	<0.2			0.281	0.033	*	-0.00018	0.00023
cg19172170	11	20627781	0.00016	<0.2	SLC6A5		0.391	-0.018		-0.00056	0.00093	*
cg19041648	7	87105216	0.00017	<0.2	ABCB4	Island	0.2	-0.023	*	0.00016	-0.0002
cg02693127	4	148652654	0.00017	<0.2	ARHGAP10	Shore	0.165	-0.047	*	-2.7e-05	0.00016
cg17298516	1	94131533	0.00017	<0.2	BCAR3		0.724	0.013		0.00029	-0.00045	*
cg17889682	7	95402733	0.00017	<0.2	DYNC1I1	Shore	0.831	-0.076	*	-0.00031	0.00042	*
cg17944572	7	100888748	0.00017	<0.2	FIS1	Shore	0.559	-0.11	*	-0.00022	0.00053	*
cg02789485	12	75783428	0.00017	<0.2	GLIPR1L2	Shore	0.568	-0.096	*	-0.00035	0.00078	*
cg06137273	3	6905031	0.00017	<0.2	GRM7	Shore	0.113	0.04	*	2.1e-05	-1.7e-05
cg24663311	2	191224886	0.00017	<0.2	INPP1		0.362	-0.062	*	-0.00031	0.00026
cg14102811	6	31649026	0.00017	<0.2	LY6G5C	Shore	0.184	-0.036	*	-8.8e-05	0.00027	*
cg10512089	11	57408751	0.00017	<0.2	MIR130A		0.719	-0.045	*	-0.00018	0.00031	*
cg26750893	2	38043481	0.00017	<0.2			0.42	0.048	*	0.00014	-0.00025	*
cg26853415	17	26127438	0.00017	<0.2	NOS2		0.805	-0.041	*	-5.8e-05	0.00013
cg10113107	11	4118978	0.00017	<0.2	RRM1	Shelf	0.68	0.031	*	1.2e-05	-0.00011
cg13439315	4	7197511	0.00017	<0.2	SORCS2	Shelf	0.545	-0.08	*	-0.00027	0.00065	*
cg24451422	1	23751210	0.00017	<0.2	TCEA3	Island	0.443	-0.051	*	-0.00028	0.00024
cg18562578	3	55517853	0.00017	<0.2	WNT5A	Island	0.131	0.027	*	0.00046	-0.00064	*
cg01751800	4	77820391	0.00018	<0.2	ANKRD56	Shore	0.765	-0.037	*	-1.5e-05	8.7e-05
cg22706106	1	153607701	0.00018	<0.2	C1orf77	Shore	0.66	-0.016		0.0003	-0.00049	*
cg15027300	19	38877874	0.00018	<0.2	GGN	Island	0.517	-0.094	*	-0.00062	0.0014	*
cg08230483	10	88123453	0.00018	<0.2	GRID1	Island	0.068	-0.022	*	0.00012	-0.00013
cg03306010	15	53750302	0.00018	<0.2			0.863	0.0098		0.00015	-0.00038	*
cg07093570	1	70953380	0.00018	<0.2			0.849	0.014		7.5e-05	-0.00041	*
cg11651574	5	10161884	0.00018	<0.2			0.902	-0.03	*	-0.00013	0.00029	*
cg13050104	14	90856296	0.00018	<0.2			0.847	0.021	*	0.00014	-0.00034	*
cg17485988	7	52738966	0.00018	<0.2			0.86	0.015	*	-3.5e-05	0.00015
cg17745088	1	50798969	0.00018	<0.2		Island	0.165	-0.033	*	-9.9e-06	2.8e-07
cg21954370	15	45018720	0.00018	<0.2			0.199	0.023	*	-0.00013	0.00025
cg05439608	7	156761192	0.00018	<0.2	NOM1	Island	0.848	0.028	*	-2.4e-05	-5.2e-05
cg03093838	6	137815725	0.00018	<0.2	OLIG3	Shore	0.42	-0.0017		-0.00011	0.0004	*
cg04881125	1	186649253	0.00018	<0.2	PTGS2	Shore	0.185	-0.038	*	-6.3e-05	0.00011
cg02713068	6	64281743	0.00018	<0.2	PTP4A1	Shore	0.172	0.013		0.00017	-0.00052	*
cg08074162	2	98423431	0.00018	<0.2	TMEM131		0.33	-0.053	*	-0.00029	0.00043	*
cg25683489	13	24245022	0.00018	<0.2	TNFRSF19		0.851	0.015	*	-3.4e-05	9.5e-05
cg23268344	4	3265763	0.00019	<0.2	C4orf44		0.65	0.012		-0.00019	0.00046	*
cg05187826	10	61552626	0.00019	<0.2	CCDC6		0.868	0.0024		-0.00017	0.00027	*
cg04570551	13	113917124	0.00019	<0.2	CUL4A	Island	0.656	0.0091		-2.2e-05	0.00014	*
cg16553327	6	15663344	0.00019	<0.2	DTNBP1	Island	0.341	-0.0039		-0.00025	0.00058	*
cg07986378	12	11898284	0.00019	<0.2	ETV6		0.568	0.059	*	0.00019	-0.00032
cg00410422	1	110951074	0.00019	<0.2	HBXIP	Shore	0.546	-0.049	*	-0.00011	0.00045	*
cg04067139	11	58673167	0.00019	<0.2		Island	0.217	-0.05	*	1.3e-05	-3.7e-05
cg08178956	2	42345201	0.00019	<0.2			0.286	-0.0023		-0.00019	0.00063	*
cg08514530	10	44163270	0.00019	<0.2		Island	0.619	-0.019		-0.00063	0.0012	*
cg08819022	22	18531447	0.00019	<0.2		Island	0.699	0.029	*	6.7e-05	0.00018
cg11014109	11	78286207	0.00019	<0.2	NARS2	Shore	0.144	-0.042	*	4.4e-05	0.00025	*
cg09456493	3	160603506	0.00019	<0.2	PPM1L		0.838	-0.014	*	-0.00016	0.00038	*
cg21291873	15	78832830	0.00019	<0.2	PSMA4	Island	0.167	0.012	*	0.00015	-0.00033	*
cg02127246	17	8296690	0.00019	<0.2	RNF222	Shore	0.891	-0.023	*	-1.2e-05	0.00011
cg22950111	1	243651920	0.00019	<0.2	SDCCAG8	Shore	0.868	-0.0042		-0.00016	0.0003	*
cg21163960	11	35441777	0.00019	<0.2	SLC1A2	Island	0.13	0.04	*	8.5e-05	-0.00023	*
cg15577605	7	87849517	0.00019	<0.2	SRI	Island	0.091	-0.018	*	-0.00012	0.00025	*
cg10390473	4	164775263	0.0002	<0.2	MAR1		0.935	0.015	*	7.8e-05	-0.0002	*
cg15017496	11	73056771	0.0002	<0.2	ARHGEF17	Shelf	0.807	-0.012		3.5e-06	-0.00021	*
cg12961080	14	99736143	0.0002	<0.2	BCL11B	Island	0.203	0.01		-0.00022	0.0005	*
cg13954090	10	73533106	0.0002	<0.2	CDH23	Island	0.064	-0.006		-8.2e-05	0.00021	*
cg03274021	8	130952480	0.0002	<0.2	FAM49B	Island	0.182	-0.017	*	-5.9e-05	6e-05
cg01542423	8	126668119	0.0002	<0.2			0.817	0.012	*	-6.3e-05	9.3e-05
cg01566396	2	161126295	0.0002	<0.2		Shore	0.525	-0.1	*	-0.00025	0.00095	*
cg02480199	5	145725913	0.0002	<0.2		Shore	0.317	0.041	*	-6e-05	-3.7e-05
cg07469887	10	131262384	0.0002	<0.2		Shelf	0.889	0.012	*	0.00014	-0.00027	*
cg10354926	13	104905791	0.0002	<0.2			0.755	-0.049	*	4.9e-05	8.1e-05
cg12942438	3	96498948	0.0002	<0.2		Shelf	0.798	0.016	*	-3e-05	0.00012
cg15053253	4	84583851	0.0002	<0.2			0.839	0.0044		-0.00014	0.00044	*
cg16312968	6	6900945	0.0002	<0.2			0.38	-0.053	*	-0.00014	0.00068	*
cg24311643	1	159748210	0.0002	<0.2		Shelf	0.834	-0.019	*	4.6e-05	-3.1e-05
cg26124526	5	60618932	0.0002	<0.2			0.527	0.037	*	-5e-05	0.0003
ch.7.3273335R	7	154752264	0.0002	<0.2	PAXIP1		0.232	-0.026	*	-0.00022	0.0004	*
cg11751117	14	56663411	0.0002	<0.2	PELI2		0.553	0.064	*	-2.9e-05	-0.0002
cg17751776	17	27370117	0.0002	<0.2	PIPOX		0.224	0.035	*	-0.0001	3e-05
cg00916635	1	114414312	0.0002	<0.2	PTPN22		0.151	0.03	*	0.00015	-0.00056	*
cg03469607	1	114355571	0.0002	<0.2	RSBN1	Shore	0.565	-0.036	*	-3.9e-05	-0.00024
cg25598319	3	133748115	0.0002	<0.2	SLCO2A1	Island	0.239	-0.045	*	-0.0003	0.00044	*
cg10861599	1	173176523	0.0002	<0.2	TNFSF4		0.151	0.032	*	1.3e-05	-2.1e-05
cg16068812	21	44528396	0.0002	<0.2	U2AF1	Shore	0.206	-0.057	*	1.3e-05	5.5e-05
cg08357601	4	71554472	0.0002	<0.2	UTP3	Island	0.154	-0.019	*	0.00019	-0.00025
cg14617634	17	79400976	0.00021	<0.2	BAHCC1		0.776	0.021	*	-7.9e-05	0.00026
cg06688763	7	92238207	0.00021	<0.2	CDK6		0.724	-0.034		0.00023	-0.00059	*
cg09953239	14	76842626	0.00021	<0.2	ESRRB	Island	0.273	-0.066	*	-0.00033	0.0006	*
cg05001932	5	126409372	0.00021	<0.2	FLJ44606	Shore	0.383	-0.026	*	0.00019	-0.0004	*
cg09473315	17	76228233	0.00021	<0.2	LOC283999	Island	0.393	-0.034		0.00042	-0.00096	*
cg03278146	18	5197327	0.00021	<0.2	LOC642597	Island	0.045	0.026	*	0.00015	-0.00021	*
cg06902607	1	247511400	0.00021	<0.2			0.445	0.03	*	-0.00015	0.00012
cg08494738	16	4369512	0.00021	<0.2		Shelf	0.731	-0.0049		0.00013	-0.00047	*
cg16683015	8	143171268	0.00021	<0.2			0.866	-0.033	*	9.4e-05	-8.2e-05
cg12738718	6	32121204	0.00021	<0.2	PPT2	Shore	0.141	-0.026	*	0.00017	-0.00019
cg06599914	11	32915903	0.00021	<0.2	QSER1	Shore	0.142	0.038	*	0.00012	-0.00032	*
cg10413136	4	8207119	0.00021	<0.2	SH3TC1		0.65	-0.061	*	-0.00022	0.00052	*
cg20170028	11	70917283	0.00021	<0.2	SHANK2		0.107	0.041	*	0.0001	-3.8e-05
cg26860994	7	127292223	0.00021	<0.2	SND1	Island	0.074	-0.018	*	9.1e-05	5.7e-06
cg23035341	1	203829481	0.00021	<0.2	SNRPE	Shore	0.892	-0.011	*	3.2e-05	-0.00011
cg04528961	2	32289715	0.00021	<0.2	SPAST	Shore	0.255	-0.041	*	-0.00021	0.0005	*
cg00710366	2	54891600	0.00021	<0.2	SPTBN1		0.869	-0.0044		-0.00021	0.00032	*
cg07095945	15	85415281	0.00022	<0.2	ALPK3		0.887	0.011	*	0.00021	-0.00027	*
cg10892950	12	45626938	0.00022	<0.2	ANO6		0.583	0.038	*	-0.00014	0.00025
cg16026760	19	4791699	0.00022	<0.2	FEM1A	Island	0.118	0.0082		-4.7e-05	0.00017	*
cg19014335	12	50099568	0.00022	<0.2	FMNL3	Shore	0.25	0.0075		0.00014	-0.00065	*
cg16814060	8	140632686	0.00022	<0.2	KCNK9	Shore	0.871	0.028	*	0.00013	-0.00039	*
cg01777812	4	90117697	0.00022	<0.2			0.756	-0.0093		-6.8e-07	-0.0002	*
cg02793828	16	85196116	0.00022	<0.2		Shore	0.749	0.036	*	0.00024	-0.00054	*
cg02050181	1	52344849	0.00022	<0.2	NRD1	Island	0.19	-0.026	*	6.3e-05	4.6e-05
cg15539245	4	146100950	0.00022	<0.2	OTUD4	Island	0.139	-0.037	*	6e-06	0.00024	*
cg19135706	5	57878390	0.00022	<0.2	RAB3C	Shore	0.213	-0.032	*	-0.00023	0.00051	*
cg06930162	19	41056205	0.00022	<0.2	SPTBN4	Shore	0.826	0.016	*	0.00012	-0.00042	*
cg15939937	19	14676202	0.00022	<0.2	TECR	Island	0.846	0.0043		0.00013	-0.00047	*
cg06089512	4	147867158	0.00022	<0.2	TTC29	Island	0.104	-0.0042		-4.4e-05	0.00019	*
cg14607370	2	70415118	0.00023	<0.2	C2orf42	Shelf	0.839	-0.023	*	-8.5e-06	0.00033	*
cg16836678	11	76836460	0.00023	<0.2	CAPN5		0.406	0.019		-0.00018	0.00032	*
cg19508191	12	109124361	0.00023	<0.2	CORO1C	Island	0.192	-0.046	*	-0.00011	0.00039	*
cg27375135	10	397923	0.00023	<0.2	DIP2C	Shore	0.882	-0.013		0.00015	-0.00024	*
cg02998463	14	76874418	0.00023	<0.2	ESRRB		0.694	0.017		0.00028	-0.00056	*
cg02225720	17	3623472	0.00023	<0.2	ITGAE	Shelf	0.173	0.023	*	-5.9e-05	6.9e-06
cg01268590	12	54346975	0.00023	<0.2		Island	0.216	0.026	*	0.00034	-0.00073	*
cg11928937	4	134388095	0.00023	<0.2			0.651	0.019		0.00028	-0.00053	*
cg12692314	6	28642279	0.00023	<0.2			0.239	-0.045	*	-0.00012	0.00052	*
cg13575217	5	139081079	0.00023	<0.2		Island	0.12	0.032	*	7.2e-05	-0.00015
cg20569369	22	51173646	0.00023	<0.2		Shelf	0.821	-0.017	*	3.2e-05	-8.7e-05
cg01906055	2	97000811	0.00023	<0.2	NCAPH	Shore	0.879	-0.029	*	-7.3e-05	7.7e-05
cg01540911	7	129283500	0.00023	<0.2	NRF1		0.931	-0.022	*	-6.9e-05	0.00016	*
cg08956138	11	118175384	0.00024	<0.2	CD3E		0.091	0.02	*	2.3e-05	-2.3e-05
cg27412284	8	1462183	0.00024	<0.2	DLGAP2		0.882	-0.021	*	3.1e-05	0.00011
cg05145297	7	75264568	0.00024	<0.2	HIP1	Shelf	0.779	0.018	*	0.00013	-0.00041	*
cg16461134	11	133804886	0.00024	<0.2	IGSF9B	Shelf	0.725	0.033	*	0.00014	-0.00024	*
cg03938043	1	212207851	0.00024	<0.2	INTS7	Shore	0.758	-0.029	*	-0.00023	0.00042	*
cg20543183	6	31648146	0.00024	<0.2	LY6G5C	Shore	0.63	-0.029	*	-7.9e-05	4e-05
cg19142399	11	45906499	0.00024	<0.2	MAPK8IP1	Shore	0.427	0.077	*	6.2e-06	0.00016
cg02825373	20	55501101	0.00024	<0.2		Island	0.168	-0.033	*	-8.2e-05	0.00014
cg15627871	3	117321806	0.00024	<0.2			0.611	0.014		-0.00043	0.00051	*
cg19812605	11	117934751	0.00024	<0.2			0.816	0.011	*	0.00017	-0.00026	*
cg21249595	6	30848811	0.00024	<0.2		Shelf	0.792	0.014		-4.7e-05	0.00019
cg26994894	16	87102691	0.00024	<0.2			0.912	-0.027	*	-1.7e-05	-3.9e-05
cg17729667	20	25566382	0.00024	<0.2	NINL	Island	0.255	0.012		0.00023	-0.00069	*
cg09293718	8	87076603	0.00024	<0.2	PSKH2		0.682	0.057	*	0.00021	-0.00052	*
cg04555097	15	56535484	0.00024	<0.2	RFX7	Shore	0.124	-0.0098		-0.00012	0.00032	*
cg16932560	6	31589994	0.00024	<0.2	SNORA38	Shore	0.646	-0.031	*	6.4e-05	-5.7e-05
cg00410370	2	175200477	0.00024	<0.2	SP9	Island	0.217	-0.035	*	0.00024	-0.00011
cg10425624	14	89291511	0.00024	<0.2	TTC8	Shore	0.369	-0.04	*	9.4e-05	-0.00026
cg17215170	2	111874943	0.00025	<0.2	ACOXL	Shore	0.151	-0.027	*	-3e-05	0.00019	*
cg24690588	1	57285399	0.00025	<0.2	C1orf168		0.807	-0.039	*	-8.2e-05	0.00025	*
cg01565985	1	6225887	0.00025	<0.2	CHD5		0.707	-0.024	*	-0.00016	0.00048	*
cg07996992	1	85040343	0.00025	<0.2	CTBS	Island	0.35	-0.0041		-0.00017	0.00047	*
cg11244091	19	46368630	0.00025	<0.2	FOXA3	Shore	0.84	0.015	*	-2.9e-05	8.3e-05
cg10237765	17	9863081	0.00025	<0.2	GAS7		0.843	-0.0076		-0.00013	0.00034	*
cg10632894	6	32552453	0.00025	<0.2	HLA-DRB1	Shore	0.85	-0.029		-0.00018	0.00059	*
cg06916670	1	202829945	0.00025	<0.2	LOC148709	Shore	0.456	0.044	*	0.00028	-0.00069	*
cg01065806	5	174162907	0.00025	<0.2		Shore	0.111	-0.009		-0.00014	0.00046	*
cg09579989	12	110685438	0.00025	<0.2			0.858	-0.023	*	-5.6e-05	1.7e-05
cg16030119	17	46663394	0.00025	<0.2		Shelf	0.122	0.012		-5e-05	0.0003	*
cg19854704	10	133508755	0.00025	<0.2		Shore	0.723	0.041	*	0.00019	-0.0004	*
cg25604819	3	82857026	0.00025	<0.2		Island	0.893	0.0079	*	-2.6e-06	-1.6e-05
cg20839034	2	20646816	0.00025	<0.2	RHOB	Island	0.088	0.0076	*	-2e-05	4.2e-05
cg03878208	11	72483293	0.00025	<0.2	STARD10		0.795	0.0091	*	-8.5e-05	7.6e-05
cg21960265	6	32015635	0.00025	<0.2	TNXB		0.798	-0.011		0.00019	-0.00028	*
cg07362537	6	33240820	0.00025	<0.2	VPS52	Shore	0.378	-0.07	*	-0.00026	0.00044	*
cg08960448	16	4838658	0.00026	<0.2	SEPT12		0.962	-0.015	*	-9.5e-05	0.00014	*
cg11749264	6	109940408	0.00026	<0.2	AKD1		0.624	0.013		0.00034	-0.00055	*
cg26048101	20	50255874	0.00026	<0.2	ATP9A		0.327	-0.063	*	-0.00014	0.00035
cg06822340	7	147355839	0.00026	<0.2	CNTNAP2		0.804	0.035	*	1.4e-05	-0.00014
cg13026370	18	8367098	0.00026	<0.2	LOC100192426	Shore	0.285	0.045	*	0.00013	-0.00045	*
cg02117489	6	167284462	0.00026	<0.2		Island	0.874	-0.011		-0.00021	0.0004	*
cg04306992	1	4712355	0.00026	<0.2		Shore	0.556	0.036	*	-0.00026	0.00035	*
cg04371726	2	63285645	0.00026	<0.2		Shore	0.21	-0.025	*	-0.00022	0.00059	*
cg06164683	3	84919438	0.00026	<0.2			0.75	0.048	*	0.00025	-0.0004	*
cg13716585	14	22917809	0.00026	<0.2			0.098	0.033	*	0.00017	-0.00032	*
cg23906459	8	143530680	0.00026	<0.2		Island	0.352	-0.11	*	-0.0008	0.0018	*
cg24417135	13	24044219	0.00026	<0.2		Shelf	0.756	0.042	*	-0.00017	2.9e-05
cg25441141	6	113012601	0.00026	<0.2			0.516	-0.056	*	-0.00022	0.00065	*
cg22945872	2	230932797	0.00026	<0.2	SLC16A14	Island	0.166	-0.024	*	-2.6e-05	0.00011
cg17445157	5	156351266	0.00026	<0.2	TIMD4		0.826	0.028	*	0.00011	-0.00027	*
cg06065089	4	96011175	0.00027	<0.2	BMPR1B		0.909	0.0013		5.3e-05	-0.00023	*
cg25519930	12	2161640	0.00027	<0.2	CACNA1C	Shore	0.109	0.032	*	7.3e-05	-0.00038	*
cg02101833	2	10471388	0.00027	<0.2	HPCAL1		0.081	0.022	*	0.00015	-0.00026	*
cg00913148	10	99794106	0.00027	<0.2		Shelf	0.946	-0.025	*	-0.00011	0.00028	*
cg04254769	5	141674673	0.00027	<0.2			0.866	-0.047	*	-7.5e-05	-9.4e-05
cg12179219	22	27149381	0.00027	<0.2		Shelf	0.798	-0.0044		0.00011	-0.00031	*
cg12836280	5	50260240	0.00027	<0.2			0.174	-0.018	*	-0.00021	0.00045	*
cg16185386	13	29077350	0.00027	<0.2			0.725	0.012		9.6e-05	-0.00039	*
cg19876092	4	144208277	0.00027	<0.2			0.958	-0.012	*	1.8e-05	-2.1e-05
cg21704793	6	155312540	0.00027	<0.2		Shelf	0.646	0.012		0.0001	-0.00048	*
cg04249460	6	41040849	0.00027	<0.2	NFYA	Island	0.203	-0.044	*	-0.0001	0.00048	*
cg18836485	14	21271018	0.00027	<0.2	RNASE1		0.72	0.027	*	-0.00019	0.00029
cg10305337	17	71420076	0.00027	<0.2	SDK2		0.893	-0.015	*	-5.5e-05	0.00014	*
cg04955791	6	152959047	0.00027	<0.2	SYNE1	Shore	0.664	0.03	*	0.0003	-0.00069	*
cg16754857	6	159052400	0.00027	<0.2	TMEM181		0.887	0.0037		-0.00012	0.00021	*
cg16584172	13	100633446	0.00027	<0.2	ZIC2	Island	0.293	-0.023	*	-0.0001	0.00035	*
cg11023668	2	25095040	0.00028	<0.2	ADCY3		0.627	0.039		0.00029	-0.001	*
cg19450111	14	99728984	0.00028	<0.2	BCL11B		0.102	0.037	*	3.9e-05	-8.7e-05
cg21462681	7	108524200	0.00028	<0.2	C7orf66		0.836	0.029	*	0.00017	-0.00038	*
cg10045881	1	111770291	0.00028	<0.2	CHI3L2		0.435	0.038	*	-0.00018	0.00032
cg26911120	8	139739878	0.00028	<0.2	COL22A1		0.111	-0.01	*	-0.00015	0.00023	*
cg21805118	12	122712153	0.00028	<0.2	DIABLO	Shore	0.755	-0.025		0.00025	-0.00033
cg10423587	10	632914	0.00028	<0.2	DIP2C	Shore	0.742	0.0051		-0.00021	0.00028	*
cg06294803	3	184033282	0.00028	<0.2	EIF4G1	Shore	0.324	-0.029	*	-0.00011	1.4e-05
cg19245758	3	101497779	0.00028	<0.2	FAM55C	Shore	0.255	-0.017		0.00016	-0.00036	*
cg04153551	14	92363727	0.00028	<0.2	FBLN5		0.901	0.0037		-9e-05	0.00018	*
cg14330868	17	12631363	0.00028	<0.2	MYOCD		0.818	-0.019	*	-0.00017	0.00043	*
cg09451457	5	87440246	0.00028	<0.2		Shelf	0.333	-0.018	*	-0.00014	0.00051	*
cg10613706	17	19355650	0.00028	<0.2			0.662	0.01		7.1e-05	-0.00031	*
cg14778967	1	183436878	0.00028	<0.2		Shelf	0.868	-0.021	*	-0.00012	0.00028	*
cg16594468	8	102039579	0.00028	<0.2			0.676	0.041	*	6.2e-05	-0.00023	*
cg20665736	15	27110029	0.00028	<0.2		Shelf	0.089	-0.0066		-0.00012	0.00028	*
cg16725535	7	4146291	0.00028	<0.2	SDK1		0.824	-0.051	*	-0.00025	0.00053	*
cg25383605	6	155538047	0.00028	<0.2	TIAM2	Shore	0.614	0.035	*	0.00016	-0.00048	*
cg08980480	12	6151702	0.00028	<0.2	VWF		0.83	-0.012		0.00012	-0.00018	*
cg26201787	12	77157648	0.00028	<0.2	ZDHHC17	Island	0.09	-0.0013		-0.00012	0.00032	*
cg03995300	17	5019989	0.00028	<0.2	ZNF232	Shore	0.32	0.058	*	0.00042	-0.00065	*
cg10760452	19	14064588	0.00029	<0.2	DCAF15	Shore	0.829	-0.0031		-0.00011	0.00024	*
cg00360769	4	101110248	0.00029	<0.2	DDIT4L	Shore	0.272	0.042	*	0.00014	-0.00026	*
cg10071690	10	666063	0.00029	<0.2	DIP2C	Shelf	0.447	0.0073		0.00023	-0.00069	*
cg13848773	10	69835125	0.00029	<0.2	HERC4	Island	0.044	-0.00027		-7.7e-05	0.00013	*
cg05851442	7	27153212	0.00029	<0.2	HOXA3	Island	0.932	-0.014	*	2.5e-05	4.3e-05
cg06172871	16	72088244	0.00029	<0.2	HP		0.4	-0.0031		-0.00014	0.00047	*
cg07510828	5	66386055	0.00029	<0.2	MAST4		0.812	-0.0014		0.00013	-0.00035	*
cg08483912	10	132632041	0.00029	<0.2			0.882	0.013	*	0.00015	-0.00021	*
cg12580893	13	112985499	0.00029	<0.2		Island	0.573	0.056		0.00027	-0.0011	*
cg13345726	17	66708409	0.00029	<0.2			0.789	0.0078		0.00021	-0.00045	*
cg13522075	9	99481726	0.00029	<0.2		Shore	0.252	-0.013		-0.00022	0.00079	*
cg15160686	1	24562825	0.00029	<0.2			0.416	0.032	*	0.00017	-0.00042	*
cg14784253	7	30473983	0.00029	<0.2	NOD1		0.785	0.036	*	5.6e-05	-0.00022
cg19088218	1	20248753	0.00029	<0.2	PLA2G2E		0.5	0.059	*	-0.0001	-7e-05
cg00997054	3	32904291	0.00029	<0.2	TRIM71		0.825	0.023	*	0.00013	-0.00026	*
cg27577972	1	151513502	0.00029	<0.2	TUFT1	Shore	0.24	0.013		0.00039	-0.00059	*
cg13291694	6	136584563	0.0003	<0.2	BCLAF1		0.928	-0.0093	*	-1.3e-05	-0.00011
cg09507184	1	156696846	0.0003	<0.2	ISG20L2	Shore	0.657	0.0078		0.00013	-0.00056	*
cg01883051	6	67178610	0.0003	<0.2			0.801	-0.013		-0.00021	0.00039	*
cg05390368	1	205183101	0.0003	<0.2		Shelf	0.865	-0.027	*	2.3e-05	5.9e-05
cg10511890	11	47416487	0.0003	<0.2		Island	0.158	0.043	*	0.00044	-0.00088	*
cg12656611	12	117630719	0.0003	<0.2		Shelf	0.852	0.027	*	0.00014	-0.00049	*
cg19206078	19	524608	0.0003	<0.2		Shore	0.801	-0.062	*	-7.9e-05	0.00039	*
cg23259394	1	24634964	0.0003	<0.2			0.783	0.029	*	0.00016	-0.00031	*
cg02554564	12	5603131	0.0003	<0.2	NTF3	Shore	0.846	-0.048	*	-0.00013	0.0003	*
cg00116412	15	50474597	0.0003	<0.2	SLC27A2	Island	0.176	-0.027	*	-0.00011	0.00036	*
cg15992940	5	138609700	0.0003	<0.2	SNHG4	Island	0.253	0.025	*	-0.00014	0.00014
cg00150848	16	89924997	0.0003	<0.2	SPIRE2	Shelf	0.859	-0.009		-0.00017	0.00037	*
cg03389133	22	37608611	0.0003	<0.2	SSTR3		0.859	-0.02	*	-3.4e-05	-2.2e-05
cg13689066	1	12167071	0.0003	<0.2	TNFRSF8		0.463	0.045	*	0.00029	-0.00062	*
cg15085454	19	35225418	0.0003	<0.2	ZNF181	Shore	0.08	0.0017		7.6e-05	-0.00023	*
cg27576271	12	93096811	0.00031	<0.2	C12orf74		0.883	-0.00058		6.8e-05	-0.00025	*
cg00489394	11	63259326	0.00031	<0.2	HRASLS5	Shore	0.229	0.023	*	-6.9e-05	0.00012
cg01939535	5	55010789	0.00031	<0.2		Shelf	0.848	-0.024	*	-2.5e-05	5.4e-05
cg17754783	1	31627987	0.00031	<0.2		Shore	0.266	-0.046	*	5e-05	0.00011
cg24809299	20	23331479	0.00031	<0.2	NXT1	Island	0.122	-0.0088		-0.00012	0.00028	*
cg08288406	19	1523917	0.00031	<0.2	PLK5P	Island	0.229	-0.039	*	0.00039	-0.00021
cg09051663	8	52320944	0.00031	<0.2	PXDNL	Shore	0.745	0.047	*	0.00024	-0.00036	*
cg11851174	17	17712609	0.00031	<0.2	RAI1	Shore	0.776	-0.01		0.00016	-0.00039	*
cg09439920	3	99979117	0.00031	<0.2	TBC1D23	Shore	0.475	-0.055	*	0.00014	-5.2e-05
cg25982880	19	4916593	0.00031	<0.2	UHRF1	Island	0.159	0.037	*	0.00024	-0.00068	*
cg06476685	2	241459638	0.00032	<0.2	ANKMY1	Island	0.503	0.072	*	0.00041	-0.00064	*
cg05655647	12	51157023	0.00032	<0.2	ATF1	Shore	0.612	0.015		0.00034	-0.00098	*
cg05892673	17	43335632	0.00032	<0.2	C17orf46	Shelf	0.884	0.021	*	5.5e-05	-0.00022	*
cg20171429	7	89873821	0.00032	<0.2	C7orf63	Shore	0.371	0.073	*	-0.00015	-0.00015
cg15022609	17	46908359	0.00032	<0.2	CALCOCO2	Island	0.299	0.063	*	0.00034	-0.00096	*
cg11654011	19	43099795	0.00032	<0.2	CEACAM8		0.562	-0.034	*	0.00021	-0.00031
cg03146981	16	70719277	0.00032	<0.2	MTSS1L	Island	0.264	-0.018	*	2.3e-05	-4.5e-05
cg04014576	6	34112818	0.00032	<0.2		Island	0.242	0.023	*	0.00019	-0.00047	*
cg21215218	1	19011172	0.00032	<0.2	PAX7		0.594	-0.026		-0.00042	0.0007	*
cg24075332	6	151712594	0.00032	<0.2	ZBTB2	Island	0.439	-0.014		-0.00034	0.00059	*
cg04522821	19	54041329	0.00032	<0.2	ZNF331	Island	0.325	-0.0017		0.00027	-0.00061	*
cg06120215	19	40562149	0.00032	<0.2	ZNF780B	Island	0.131	-0.012	*	0.00014	-0.00013
cg16821385	11	46467232	0.00033	<0.2	AMBRA1		0.853	0.0079		-7.1e-05	0.00024	*
cg22825780	7	48076004	0.00033	<0.2	C7orf57	Shore	0.267	-0.028	*	0.00013	-0.00018
cg09742346	16	81527501	0.00033	<0.2	CMIP		0.617	0.0033		-0.00031	0.00052	*
cg18964706	6	30921630	0.00033	<0.2	DPCR1	Shore	0.895	-0.016	*	-7.6e-06	-9.3e-05
cg01535698	1	240255136	0.00033	<0.2	FMN2	Island	0.095	-0.037	*	6.6e-05	-1.2e-05
cg17462074	12	14133168	0.00033	<0.2	GRIN2B	Shore	0.113	0.037	*	-7.3e-05	-0.00015
cg07147958	8	116822442	0.00033	<0.2			0.844	0.01		0.00014	-0.00042	*
cg22352176	1	222987845	0.00033	<0.2		Shore	0.879	-0.042	*	5.3e-05	-0.00015
cg13019513	7	96339249	0.00033	<0.2	SHFM1	Island	0.11	0.0011		-9.2e-05	0.00028	*
cg22763680	17	33815432	0.00033	<0.2	SLFN12L	Shore	0.192	0.0045		0.00022	-0.00046	*
cg03743605	1	179050691	0.00033	<0.2	TOR3A	Shore	0.157	-0.015		-0.00014	0.00067	*
cg17549927	7	1748615	0.00034	<0.2	ELFN1		0.748	0.022	*	0.0002	-0.00049	*
cg10786098	12	117468289	0.00034	<0.2	FBXW8		0.849	0.0028		-0.00019	0.0004	*
cg07777008	11	27015808	0.00034	<0.2	FIBIN		0.368	0.05	*	3.3e-05	-0.00011
cg01030476	1	236686564	0.00034	<0.2	LGALS8	Shore	0.539	0.069	*	0.00013	-0.00029
cg01068332	8	82784211	0.00034	<0.2			0.788	0.0033		-0.00023	0.00041	*
cg22260415	17	4935130	0.00034	<0.2			0.061	-0.016	*	1.8e-05	-1.8e-06
cg24972087	18	77387841	0.00034	<0.2		Shore	0.84	0.0088		9.3e-05	-0.0004	*
cg26335971	12	52341795	0.00034	<0.2		Shelf	0.82	0.023	*	0.00015	-0.00039	*
cg11060907	12	116971025	0.00034	<0.2	NCRNA00173		0.106	0.0096		-3.1e-05	0.00038	*
cg00208153	13	58206058	0.00034	<0.2	PCDH17	Shore	0.133	0.042	*	0.00015	-0.00047	*
cg17010100	5	59188112	0.00034	<0.2	PDE4D	Shore	0.175	0.017		-0.00012	0.00022
cg27039606	19	36305049	0.00034	<0.2	PRODH2		0.835	0.025	*	0.00015	-0.00038	*
cg04196933	5	178195556	0.00035	<0.2	AACSL		0.933	0.013	*	-2.5e-05	1.3e-05
cg16926734	1	38152104	0.00035	<0.2	C1orf109	Shelf	0.878	-0.012	*	1.4e-05	-8.6e-05
cg15465878	1	45183988	0.00035	<0.2	C1orf228		0.939	-0.013	*	4.3e-05	-7.5e-06
cg20242752	1	179713091	0.00035	<0.2	FAM163A	Island	0.107	-0.026	*	1.8e-05	6.9e-05
cg06556397	1	42801023	0.00035	<0.2	FOXJ3	Island	0.121	-0.002		-8.2e-05	0.00019	*
cg07298772	2	176306492	0.00035	<0.2			0.782	-0.044	*	-0.00012	2.8e-05
cg10266547	11	2365953	0.00035	<0.2			0.886	0.0015		0.00011	-0.00023	*
cg22058990	6	166143043	0.00035	<0.2		Shelf	0.098	0.0098		-4.9e-05	0.00017	*
cg19910780	10	6622555	0.00035	<0.2	PRKCQ	Island	0.217	-0.043	*	-0.00015	0.00056	*
cg26932437	17	61904493	0.00035	<0.2	PSMC5	Shore	0.161	-0.014	*	-7.3e-05	0.00039	*
cg15468739	11	82735870	0.00035	<0.2	RAB30		0.824	0.03	*	2.6e-05	-8.3e-05
cg14918008	6	160669420	0.00035	<0.2	SLC22A2		0.708	0.021	*	-3.7e-05	-8.8e-06
cg24917065	8	23418389	0.00035	<0.2	SLC25A37		0.667	0.038	*	-0.00027	0.00029
cg10873330	4	7677873	0.00035	<0.2	SORCS2		0.656	0.038	*	0.00013	-0.00015
cg09502221	1	75198599	0.00035	<0.2	TYW3		0.025	0.00034		-7.5e-05	0.00012	*
cg24536691	6	33238768	0.00035	<0.2	VPS52	Shore	0.82	-0.022	*	5.8e-06	1.5e-05
cg05661282	19	58220370	0.00035	<0.2	ZNF154	Island	0.115	0.035	*	0.00013	-0.0006	*
cg16455972	17	18286412	0.00036	<0.2	EVPLL	Island	0.548	0.015		-0.00023	0.00041	*
cg07536910	2	176948105	0.00036	<0.2	EVX2	Island	0.235	-0.035	*	-0.00029	0.00085	*
cg18803655	12	12849748	0.00036	<0.2	GPR19	Shore	0.165	-0.042	*	-0.0001	0.00021
cg01911678	12	133302035	0.00036	<0.2		Shore	0.89	-0.0016		-9.7e-05	0.00022	*
cg14632490	1	46911983	0.00036	<0.2		Shore	0.873	-0.026	*	-6.7e-05	0.0002	*
cg27627215	8	11774497	0.00036	<0.2			0.777	-0.017		0.0003	-0.00059	*
cg24511404	1	212607111	0.00036	<0.2	NENF	Shore	0.806	-0.0095		7.1e-05	-0.00027	*
cg13549444	12	7060474	0.00036	<0.2	PTPN6		0.196	0.041	*	0.00019	-0.00025	*
cg26642510	19	6501778	0.00036	<0.2	TUBB4	Shore	0.458	-0.066	*	0.00013	-9.4e-05
cg18376497	4	143488622	0.00037	<0.2	INPP4B		0.318	0.024		-6e-05	0.00048	*
cg04063166	11	30034452	0.00037	<0.2	KCNA4	Shelf	0.642	-0.042	*	-8e-05	2.3e-05
cg03029734	6	101841158	0.00037	<0.2		Shore	0.322	0.059	*	1.1e-06	-0.00052	*
cg12976394	12	102226620	0.00037	<0.2		Shelf	0.961	-0.016	*	-0.00015	0.00028	*
cg16749243	10	109802441	0.00037	<0.2			0.547	0.043	*	0.0002	-0.00035	*
cg22375663	12	69725435	0.00037	<0.2			0.316	-0.069	*	9.3e-05	0.00032
cg25689079	10	47151300	0.00037	<0.2		Shore	0.153	-0.02	*	-5.2e-05	0.00012	*
cg20434529	1	248100345	0.00037	<0.2	OR2L13	Island	0.214	0.066		0.00072	-0.0012	*
cg27560864	11	118024339	0.00037	<0.2	SCN4B	Shore	0.304	0.0089		-0.00012	0.00032	*
cg15130459	5	40834228	0.00037	<0.2	SNORD72	Shore	0.471	-0.024	*	0.00011	-0.00023
cg14042635	17	40440916	0.00037	<0.2	STAT5A	Island	0.155	0.037	*	7.5e-05	-0.00035	*
cg03140889	8	70555135	0.00037	<0.2	SULF1		0.863	0.014	*	-0.00011	0.00013
cg01182873	7	141464291	0.00037	<0.2	TAS2R3		0.931	-0.014	*	1.2e-05	0.0001	*
cg01268541	4	113970660	0.00038	<0.2	ANK2		0.417	-0.082	*	-9.8e-05	0.00056	*
cg08354681	6	4773278	0.00038	<0.2	CDYL	Shore	0.631	0.0094		-4.5e-05	0.00032	*
cg25390476	20	32398948	0.00038	<0.2	CHMP4B	Shore	0.096	0.0035		-0.00012	0.00021	*
cg11267527	10	44881934	0.00038	<0.2	CXCL12	Island	0.415	-0.022		-0.00016	0.00062	*
cg11674381	3	19026539	0.00038	<0.2			0.877	0.026	*	-5.2e-05	-0.00011
cg10852662	6	28967324	0.00038	<0.2	ZNF311		0.812	0.02	*	-6.4e-05	4.7e-05
cg00507915	19	58178992	0.00038	<0.2	ZSCAN4	Shelf	0.897	-0.02	*	-0.00012	0.00031	*
cg17754782	17	72576122	0.00039	<0.2	CD300LD		0.255	-0.00021		0.00033	-0.00062	*
cg09192377	10	94834219	0.00039	<0.2	CYP26A1	Island	0.131	0.015	*	6.9e-05	-0.00018	*
cg08610361	12	77459885	0.00039	<0.2	E2F7	Island	0.085	0.017	*	-3.1e-05	-0.0001
cg05155704	6	54711276	0.00039	<0.2	FAM83B	Island	0.266	0.016		-0.00023	0.00032	*
cg10844844	6	39197502	0.00039	<0.2	KCNK5	Island	0.165	0.0033		0.00018	-0.00029	*
cg08759960	6	31649335	0.00039	<0.2	LY6G5C	Island	0.251	-0.033	*	7.9e-06	0.0002
cg13081331	7	1308600	0.00039	<0.2			0.739	-0.042	*	-7.2e-05	0.00029	*
cg14550910	10	54216510	0.00039	<0.2			0.495	0.029	*	-1.8e-05	1.9e-05
cg17958203	17	33734481	0.00039	<0.2		Shore	0.859	0.02	*	7.8e-05	-5.2e-05
cg23516634	3	5068177	0.00039	<0.2		Island	0.267	-0.054	*	-0.00022	0.0005	*
cg23931919	10	5656296	0.00039	<0.2			0.895	-0.017	*	-0.0001	0.00019	*
cg00243480	14	34269416	0.00039	<0.2	NPAS3	Island	0.329	0.041		0.00044	-0.0012	*
cg14280382	12	96094182	0.00039	<0.2	NTN4		0.77	0.015	*	-1.1e-05	-0.00031	*
cg09303161	2	192542598	0.00039	<0.2	OBFC2A	Island	0.178	0.003		-8.8e-05	0.00017	*
cg10932086	14	90041348	0.00039	<0.2	PRO1768		0.823	0.029	*	0.00019	-0.0003	*
cg04507187	16	19179258	0.00039	<0.2	SYT17	Island	0.087	-0.0072		0.00012	-0.00011
cg06976250	11	113258750	0.0004	<0.2	ANKK1	Island	0.198	-0.0069		0.00061	-0.00075	*
cg23358740	14	102198157	0.0004	<0.2	C14orf72		0.515	-0.078	*	-0.00026	0.00024
cg00235460	2	175867417	0.0004	<0.2	CHN1	Shelf	0.664	0.035	*	4.4e-05	-6.9e-05
cg21949625	5	171433892	0.0004	<0.2	FBXW11	Island	0.136	0.0017		-0.00011	0.00018	*
cg17082347	15	68118006	0.0004	<0.2	LBXCOR1	Island	0.114	0.039	*	0.00015	-0.00054	*
cg23866687	11	96026956	0.0004	<0.2	MAML2		0.139	0.04	*	0.0002	-0.00038	*
cg02683408	17	79487159	0.0004	<0.2		Shore	0.896	-0.015	*	1.4e-05	-0.00015
cg06572093	14	69095231	0.0004	<0.2		Island	0.345	0.088	*	0.00045	-0.0013	*
cg09725286	8	134419335	0.0004	<0.2			0.712	0.043	*	2e-05	-0.00039	*
cg09890980	1	209401512	0.0004	<0.2		Shelf	0.919	-0.023	*	0.0001	-0.0001
cg09829983	2	7017698	0.0004	<0.2	RSAD2		0.154	-0.031	*	-0.00015	0.00034	*
cg14001858	8	50847816	0.0004	<0.2	SNTG1		0.814	0.031	*	0.00011	-0.00034	*
cg20834178	4	6944071	0.0004	<0.2	TBC1D14		0.121	0.022	*	0.00012	-0.00027	*
cg12559208	19	54668230	0.0004	<0.2	TMC4	Island	0.092	0.043	*	0.00014	-0.00037	*
cg21530915	6	158958825	0.0004	<0.2	TMEM181	Shore	0.659	-0.084	*	1.2e-05	0.00038
cg27565899	1	110166664	0.00041	<0.2	AMPD2	Shelf	0.472	0.013		-6.8e-05	0.00032	*
cg07491676	15	76400783	0.00041	<0.2	C15orf27		0.756	0.023	*	0.0002	-0.00057	*
cg05852395	17	72589093	0.00041	<0.2	CD300LD		0.661	0.032	*	0.0001	-0.00033	*
cg00095259	18	59218797	0.00041	<0.2	CDH20	Shelf	0.516	-0.035	*	0.00011	-0.00028
cg13591408	12	104920290	0.00041	<0.2	CHST11		0.437	-0.0015		-0.00034	0.00069	*
cg13010299	20	34129465	0.00041	<0.2	ERGIC3	Shore	0.463	-0.046	*	-3e-05	4.6e-05
cg19846314	2	171680113	0.00041	<0.2	GAD1	Island	0.305	0.011		0.00036	-0.00057	*
cg06111461	10	778123	0.00041	<0.2			0.725	0.021	*	0.00011	-0.00038	*
cg08985063	4	4866800	0.00041	<0.2		Island	0.143	-0.0038		-4.5e-05	0.00031	*
cg19410609	2	31541350	0.00041	<0.2			0.31	0.046	*	-1.5e-05	-6.6e-05
cg05733703	4	39977200	0.00041	<0.2	PDS5A	Shore	0.771	-0.021	*	-3.8e-05	-5.9e-05
cg17006315	7	100959771	0.00041	<0.2	RABL5		0.839	-0.011		-0.00023	0.00042	*
cg04915566	21	36421472	0.00041	<0.2	RUNX1		0.046	0.016	*	0.0001	-0.00023	*
cg18982286	22	51136325	0.00041	<0.2	SHANK3	Shore	0.923	-0.018	*	-6e-05	0.00018	*
cg01627492	17	18916400	0.00041	<0.2	SLC5A10	Shore	0.832	0.0073		6.3e-05	-0.00036	*
cg05687370	4	113189960	0.00042	<0.2	AP1AR		0.875	0.00095		7.6e-05	-0.00021	*
cg12619509	16	2286601	0.00042	<0.2	DNASE1L2	Island	0.464	-0.031	*	-0.00028	0.00058	*
cg17165766	8	117767944	0.00042	<0.2	EIF3H	Island	0.199	-0.0016		0.00013	-0.00027	*
cg08393008	16	634271	0.00042	<0.2		Shore	0.76	-0.037	*	-0.00021	0.00033	*
cg11168112	3	42638459	0.00042	<0.2		Shelf	0.896	0.019	*	2.9e-05	-0.0002	*
cg16765531	7	84330779	0.00042	<0.2			0.697	0.0033		0.00032	-0.00055	*
cg19033073	11	64146776	0.00042	<0.2			0.902	0.0019		-8.4e-05	0.00028	*
cg23355992	20	48998616	0.00042	<0.2			0.153	0.022	*	-0.00011	5.9e-05
cg05368731	17	41323189	0.00042	<0.2	NBR1	Island	0.246	0.033	*	0.00016	-0.0005	*
cg16080876	8	24813866	0.00042	<0.2	NEFL	Island	0.142	-0.00051		-0.00016	0.00039	*
cg14652230	3	49466297	0.00042	<0.2	NICN1	Shore	0.2	-0.029	*	2.7e-05	9.4e-05
cg01731500	17	80192237	0.00042	<0.2	SLC16A3	Shelf	0.769	-0.024	*	3.2e-05	0.00011
cg03018634	3	36424308	0.00042	<0.2	STAC	Shelf	0.845	-0.0044		5e-05	-0.00024	*
cg19767857	10	29891224	0.00042	<0.2	SVIL		0.84	0.02	*	0.00012	-0.0003	*
cg11277143	2	10334372	0.00043	<0.2	C2orf48		0.874	-0.017	*	-0.00018	0.0003	*
cg02551007	7	201823	0.00043	<0.2	FAM20C		0.85	-0.012	*	2.6e-05	-6.8e-05
cg19720377	17	9732025	0.00043	<0.2	GLP2R		0.657	0.025	*	0.00011	-0.00015
cg21559386	20	43029652	0.00043	<0.2	HNF4A		0.776	-0.0051		0.00025	-0.00041	*
cg16812893	21	31813075	0.00043	<0.2	KRTAP15-1		0.721	0.029	*	0.00012	-0.00035	*
cg12242373	10	105978672	0.00043	<0.2	MIR609		0.097	0.03	*	0.00022	-0.00045	*
cg00469395	16	89315104	0.00043	<0.2		Island	0.839	-0.0016		-9.8e-05	0.0002	*
cg22911462	2	73162158	0.00043	<0.2			0.729	0.00046		0.00018	-0.00029	*
cg25087589	12	125694144	0.00043	<0.2			0.863	-0.0082		0.00013	-0.00033	*
cg27661846	12	120832521	0.00043	<0.2		Shelf	0.305	-0.02		0.00025	-0.00054	*
cg00379648	12	106979451	0.00043	<0.2	RFX4	Island	0.23	0.029	*	-0.00013	0.00031
cg09058554	1	9600721	0.00043	<0.2	SLC25A33	Shore	0.742	-0.054	*	-0.00013	0.00036	*
cg06373887	3	12574655	0.00043	<0.2	TSEN2		0.881	0.0086	*	-7.2e-05	9.2e-05
cg06158627	4	7768357	0.00044	<0.2	AFAP1		0.794	-0.011		-0.0004	0.00047	*
cg14178043	1	223921358	0.00044	<0.2	CAPN2		0.757	0.0061		0.00023	-0.00037	*
cg11126313	3	46284262	0.00044	<0.2	CCR3		0.946	-0.012	*	-5.4e-05	0.00019	*
cg19422369	7	2827064	0.00044	<0.2	GNA12		0.68	0.0013		-0.0001	0.00028	*
cg16679386	20	3732213	0.00044	<0.2	HSPA12B	Island	0.906	-0.0079		-0.00019	0.00037	*
cg03629107	8	101678439	0.00044	<0.2			0.743	0.042	*	0.00026	-0.00036	*
cg20440718	4	178228633	0.00044	<0.2		Shelf	0.908	-0.0015		4.1e-05	-0.00013	*
cg21760363	3	167835467	0.00044	<0.2			0.92	-0.022	*	-8.8e-05	0.00017	*
cg27535677	6	28601365	0.00044	<0.2		Shore	0.538	0.041		-0.00034	0.00053	*
cg07283833	6	84563444	0.00044	<0.2	RIPPLY2	Island	0.182	-0.035	*	8.7e-05	6.3e-05
cg14619259	5	141705539	0.00044	<0.2	SPRY4	Island	0.145	0.057	*	0.00036	-0.00064	*
cg09354037	6	32813531	0.00044	<0.2	TAP1	Shore	0.111	0.022	*	0.00011	-0.00017	*
cg06064525	11	970664	0.00045	<0.2	AP2A2		0.479	-0.0078		0.00068	-0.0011	*
cg07601672	11	27384696	0.00045	<0.2	CCDC34	Island	0.089	-0.007		-5.8e-05	0.00025	*
cg12468774	3	49236860	0.00045	<0.2	CCDC36	Island	0.824	-0.019		0.00017	-0.00043	*
cg24124145	4	139936112	0.00045	<0.2	CCRN4L	Shore	0.468	0.021	*	0.00015	-0.0004	*
cg10914115	6	31704828	0.00045	<0.2	CLIC1	Shelf	0.344	-0.0018		-0.00018	0.00037	*
cg23574281	2	47716	0.00045	<0.2	FAM110C	Shore	0.621	0.047	*	6.6e-05	-0.00017
cg10461004	4	13549496	0.00045	<0.2	LOC285548	Island	0.069	-0.02	*	-0.0002	0.0003	*
cg09354692	6	160122650	0.00045	<0.2			0.441	0.039	*	-0.00036	0.00024
cg10138623	10	113597444	0.00045	<0.2			0.909	-0.034	*	-0.00013	0.00029	*
cg14665965	5	134868054	0.00045	<0.2		Shelf	0.855	-0.028	*	-0.0002	0.00037	*
cg16714096	9	98981875	0.00045	<0.2		Island	0.053	0.021	*	9e-05	-0.00015	*
cg13465946	19	13208349	0.00045	<0.2	NFIX	Island	0.085	0.031	*	0.00011	-0.00028	*
cg24917775	19	46526675	0.00045	<0.2	PGLYRP1	Shore	0.412	0.00091		0.00019	-0.00039	*
cg04223420	5	134363877	0.00045	<0.2	PITX1	Island	0.521	0.013		0.00042	-0.001	*
cg17374958	3	158990856	0.00045	<0.2	SCHIP1		0.793	0.044	*	0.00012	-0.00072	*
cg17733616	17	73083887	0.00045	<0.2	SLC16A5	Island	0.031	0.007		7.5e-05	-0.00022	*
cg03940520	17	47925010	0.00045	<0.2	TAC4	Shelf	0.892	-0.0023		0.00012	-0.00019	*
cg11875119	22	31003147	0.00045	<0.2	TCN2		0.237	-0.058	*	-0.00036	0.00058	*
cg20707907	4	48257144	0.00045	<0.2	TEC		0.884	-0.019	*	-0.00018	0.00034	*
cg22548485	6	35466777	0.00045	<0.2	TULP1	Shore	0.635	0.0071		0.00015	-0.0005	*
cg22240520	7	158855297	0.00045	<0.2	VIPR2	Shore	0.739	0.0022		-8.5e-05	0.00019	*
cg18119192	8	11567691	0.00046	<0.2	GATA4	Shore	0.295	0.022		-0.00025	0.00029
cg17603502	17	14204056	0.00046	<0.2	HS3ST3B1	Shore	0.192	-0.022	*	-0.0002	0.00049	*
cg16905822	10	924646	0.00046	<0.2	LARP4B		0.798	-0.015	*	0.00013	-4.6e-05
cg20939723	2	171570700	0.00046	<0.2	LOC440925	Island	0.104	-0.0021		-4.1e-05	0.00021	*
cg03619352	5	179219098	0.00046	<0.2		Shelf	0.178	0.031	*	-4.6e-05	-1e-05
cg11825436	1	157961169	0.00046	<0.2		Shelf	0.846	-0.0032		0.00016	-0.00022	*
cg23058719	4	1779625	0.00046	<0.2			0.641	-0.002		0.00012	-0.0003	*
cg24264285	8	103740151	0.00046	<0.2			0.674	0.0098		8.6e-05	-0.00041	*
cg26267259	7	157407820	0.00046	<0.2	PTPRN2	Shore	0.876	0.02	*	6.9e-05	-0.00011
cg03092271	19	23945472	0.00046	<0.2	RPSAP58	Shore	0.532	0.036	*	-9.5e-05	8.2e-05
cg16789764	14	89066213	0.00046	<0.2	ZC3H14		0.757	0.037	*	-1.2e-05	-0.00018
cg20582941	3	35721166	0.00047	<0.2	ARPP-21		0.822	-0.0075		0.00013	-0.00023	*
cg00976619	3	156876725	0.00047	<0.2	CCNL1	Shore	0.74	-0.06	*	0.00011	0.00014
cg06086611	1	240657139	0.00047	<0.2	GREM2	Shore	0.785	0.035	*	0.00022	-0.00035	*
cg06835074	10	85985319	0.00047	<0.2	LRIT2		0.885	-0.033	*	-0.0002	0.00045	*
cg17787876	1	156467057	0.00047	<0.2	MEF2D	Shelf	0.627	0.027		-0.00024	0.00049	*
cg00322319	2	162094696	0.00047	<0.2		Island	0.138	-0.029	*	-0.0001	0.00029	*
cg10596412	6	45682477	0.00047	<0.2			0.398	-0.036	*	-0.00023	0.00053	*
cg12379383	15	96896940	0.00047	<0.2		Island	0.366	0.062	*	0.00029	-0.00046	*
cg18793195	7	93605827	0.00047	<0.2			0.886	-0.022	*	2.9e-05	1.2e-05
cg17996830	11	78616440	0.00047	<0.2	ODZ4	Shore	0.888	-0.063	*	-7.8e-05	0.00018
cg13046524	20	48728642	0.00047	<0.2	UBE2V1	Shore	0.633	-0.038	*	-2.7e-05	0.00035	*
cg06213598	17	67058208	0.00048	<0.2	ABCA9		0.881	0.013		0.00016	-0.00046	*
cg26585899	16	71914820	0.00048	<0.2	ATXN1L	Shelf	0.424	0.043	*	0.00012	-0.00013
cg20408276	2	38300586	0.00048	<0.2	CYP1B1	Shore	0.592	0.0045		0.00044	-0.00085	*
cg07748847	12	14124857	0.00048	<0.2	GRIN2B		0.88	-0.047	*	-0.00019	0.00029	*
cg11994984	2	198364525	0.00048	<0.2	HSPD1	Island	0.305	0.026	*	-6.1e-06	-5.7e-05
cg04743883	19	32252559	0.00048	<0.2			0.641	-0.061	*	4.3e-05	0.00033
cg05394800	13	50707050	0.00048	<0.2		Shore	0.447	-0.021		0.00013	-0.00052	*
cg07055302	2	55507730	0.00048	<0.2		Shore	0.854	-0.0045		0.00015	-0.00018	*
cg08928693	3	182400839	0.00048	<0.2		Island	0.142	-0.02	*	-0.0001	0.00014	*
cg15756227	4	185937405	0.00048	<0.2		Island	0.132	-0.0016		8.6e-05	-0.00035	*
cg16178091	5	37844401	0.00048	<0.2		Shelf	0.519	-0.061	*	-0.00058	0.00085	*
cg17387694	19	32833011	0.00048	<0.2		Shelf	0.83	0.021	*	5.9e-05	-0.00014	*
cg26550068	8	142613273	0.00048	<0.2			0.784	-0.041	*	6.9e-05	2.6e-06
cg27030744	6	44496130	0.00048	<0.2			0.865	0.0069		-5.8e-05	0.00013	*
cg16944092	12	57634555	0.00048	<0.2	NDUFA4L2	Island	0.326	0.021	*	-0.00014	0.00021
cg19909063	19	13113455	0.00048	<0.2	NFIX	Island	0.685	-0.019	*	0.00012	-0.0002
cg12376941	18	47901635	0.00048	<0.2	SKA1	Island	0.1	0.019	*	2.3e-05	-0.0002	*
cg16782719	12	129280334	0.00048	<0.2	SLC15A4	Island	0.78	0.0084		0.00011	-0.00051	*
cg20416648	5	93076750	0.00049	<0.2	FAM172A		0.799	-0.0028		-0.0002	0.00031	*
cg04833731	16	30124803	0.00049	<0.2	GDPD3		0.949	-0.014	*	-1.2e-06	7.8e-05
cg01171885	8	63949480	0.00049	<0.2	GGH	Shore	0.732	0.049	*	-7.1e-05	-0.00053	*
cg05210501	7	27219344	0.00049	<0.2	HOXA10	Island	0.282	-0.038	*	0.00022	-0.00028
cg14337027	17	46803802	0.00049	<0.2	HOXB13	Shore	0.439	-0.049	*	-0.00021	0.00083	*
cg03719908	14	105168128	0.00049	<0.2	INF2	Island	0.825	0.0093		-0.00017	0.00026	*
cg04120407	16	87769974	0.00049	<0.2	KLHDC4		0.906	-0.0044		0.0001	-0.00013	*
cg24156949	1	25874418	0.00049	<0.2	LDLRAP1	Shelf	0.738	-0.003		-0.00014	0.00031	*
cg09554856	11	33914646	0.00049	<0.2	LMO2		0.239	-0.0021		-4.8e-05	0.00039	*
cg06288821	8	56791882	0.00049	<0.2	LYN	Shore	0.114	-0.0045		0.00013	-0.0003	*
cg09242747	6	142007795	0.00049	<0.2			0.778	0.024	*	-3.3e-05	-7.9e-05
cg18180339	1	220448523	0.00049	<0.2		Shelf	0.739	-0.017	*	-3.9e-05	-1.1e-05
cg19042390	6	166261046	0.00049	<0.2			0.641	-0.022		-0.00046	0.00084	*
cg22728904	7	100433983	0.00049	<0.2		Shore	0.346	0.0098		0.00028	-0.00053	*
cg05937737	3	170303540	0.00049	<0.2	SLC7A14	Island	0.618	-0.0059		-0.00036	0.00071	*
cg02743674	11	2433468	0.00049	<0.2	TRPM5	Shore	0.677	-0.027	*	-2.1e-05	-9.5e-06
cg14273116	4	107897	0.00049	<0.2	ZNF718	Island	0.301	0.0088		7.4e-06	-0.00052	*
cg00042882	7	100796809	0.0005	<0.2	AP1S1	Shore	0.132	0.031	*	0.00017	-0.00039	*
cg05386606	7	72972279	0.0005	<0.2	BCL7B	Shore	0.309	-0.033	*	0.00025	-0.0003
cg15648389	12	54448769	0.0005	<0.2	HOXC4	Shore	0.434	0.013		-0.00034	0.00063	*
cg24710320	3	192958832	0.0005	<0.2	MGC2889	Island	0.171	-0.03	*	0.00015	-7.3e-05
cg00697672	16	89151343	0.0005	<0.2			0.788	-0.04	*	-8.8e-05	0.00024	*
cg02071294	5	162993374	0.0005	<0.2			0.116	0.0057		0.00011	-0.00031	*
cg02916809	4	1003208	0.0005	<0.2		Island	0.113	0.018	*	1.4e-05	-5.2e-05
cg06212297	16	48079666	0.0005	<0.2			0.577	0.04		7.6e-05	-0.00055	*
cg06623560	14	81902963	0.0005	<0.2		Island	0.113	-0.013		0.00011	-0.00016
cg09132178	16	78079569	0.0005	<0.2		Shore	0.868	0.0075		0.00024	-0.00047	*
cg02769705	1	202975059	0.0005	<0.2	TMEM183B	Shore	0.415	0.023		-0.00016	0.0004	*
cg06736434	19	20231820	0.0005	<0.2	ZNF90		0.854	0.029	*	0.00015	-0.00035	*
cg15935247	17	56606842	0.00051	<0.2	SEPT4	Shelf	0.626	0.03	*	0.00015	4.5e-05
cg22730967	1	203097454	0.00051	<0.2	ADORA1	Island	0.231	0.024	*	0.00026	-0.00047	*
cg21978618	19	49298898	0.00051	<0.2	BCAT2	Shore	0.188	-0.031	*	6.6e-06	0.00016
cg02053807	20	61147144	0.00051	<0.2	C20orf166	Shore	0.718	-0.03	*	-0.00013	0.0003	*
cg03355690	6	35265616	0.00051	<0.2	DEF6		0.133	-0.0021		0.0002	-0.00023	*
cg17498101	6	121758292	0.00051	<0.2	GJA1		0.234	-0.046	*	-0.00027	0.0003
cg00506343	12	54421033	0.00051	<0.2	HOXC4	Shelf	0.13	0.022	*	-5.9e-05	0.00021
cg26031613	14	104095156	0.00051	<0.2	KLC1	Island	0.147	0.072	*	9.3e-05	-0.00059	*
cg02749088	2	68672834	0.00051	<0.2			0.896	-0.0078		0.00012	-0.00014	*
cg07379508	2	171630114	0.00051	<0.2		Shelf	0.912	0.01	*	9.4e-05	-0.00023	*
cg13230208	1	27524410	0.00051	<0.2		Shelf	0.395	0.017		-0.0003	0.00065	*
cg17474224	1	87760209	0.00051	<0.2			0.885	-0.0072		0.00014	-0.00018	*
cg17960886	19	22800629	0.00051	<0.2		Shore	0.46	0.054	*	0.00026	-0.00034
cg23969884	7	44517174	0.00051	<0.2	NUDCD3		0.197	-0.042	*	-0.00019	0.00034	*
cg15153914	20	44563668	0.00051	<0.2	PCIF1	Island	0.237	0.03	*	8.7e-05	-1.1e-05
cg15028160	19	49622717	0.00051	<0.2	PPFIA3	Island	0.649	-0.055	*	0.00038	-0.00053
cg14583973	4	3374767	0.00051	<0.2	RGS12	Island	0.661	0.01		-0.00025	0.00062	*
cg20061654	22	45608492	0.00052	<0.2	C22orf9		0.739	0.038	*	-3.7e-05	0.0004	*
cg01363198	3	134878739	0.00052	<0.2	EPHB1		0.675	-0.047	*	-1.8e-05	0.00018
cg05321361	5	2750263	0.00052	<0.2	IRX2	Island	0.298	-0.018		-3.9e-05	0.00063	*
cg24480735	19	54219381	0.00052	<0.2	MIR521-2		0.776	0.028	*	-0.0001	8.1e-05
cg07128473	8	116891579	0.00052	<0.2			0.851	0.015	*	6.2e-05	-0.00027	*
cg09221159	10	90031426	0.00052	<0.2			0.549	-0.02		-0.00021	0.00056	*
cg13269342	6	10312977	0.00052	<0.2			0.773	0.034	*	1.6e-05	9.4e-05
cg09636661	16	69743901	0.00052	<0.2	NQO1		0.583	-0.035	*	-9.8e-05	0.00033	*
cg17733594	1	232603394	0.00052	<0.2	SIPA1L2		0.837	0.02	*	5.5e-05	-0.00025	*
cg22377040	6	30071412	0.00052	<0.2	TRIM31	Island	0.248	-0.035	*	-0.00014	0.00069	*
cg26483037	16	3448410	0.00052	<0.2	ZNF434	Shelf	0.874	0.019	*	0.00017	-0.00024	*
cg14192029	4	126058	0.00052	<0.2	ZNF718	Shore	0.687	0.044		-0.00046	0.00065	*
cg02331198	6	106988121	0.00053	<0.2	AIM1		0.33	-0.00042		-0.00022	0.00049	*
cg14409810	9	140172908	0.00053	<0.2	C9orf167	Island	0.508	-0.029		0.00036	-0.00042
cg02358862	16	30197211	0.00053	<0.2	CORO1A	Shore	0.256	0.023	*	-0.00014	-2.6e-05
cg01922700	1	197431704	0.00053	<0.2	CRB1		0.877	0.026	*	5.2e-05	-0.00024	*
cg04861230	1	159682497	0.00053	<0.2	CRP		0.882	-0.022	*	-9.9e-05	0.00011
cg22525701	15	45401952	0.00053	<0.2	DUOX2	Shore	0.788	0.0015		0.00014	-0.0003	*
cg16879608	12	13356921	0.00053	<0.2	EMP1		0.57	0.0084		0.00021	-0.00035	*
cg08173709	3	71103443	0.00053	<0.2	FOXP1		0.692	0.0078		0.0002	-0.0005	*
cg26534057	16	19301966	0.00053	<0.2	LOC728276		0.831	-0.028	*	4.9e-05	-0.00014
cg00051704	22	21353809	0.00053	<0.2		Shore	0.946	-0.011	*	3.3e-05	-6.7e-06
cg04888174	12	33139435	0.00053	<0.2			0.724	-0.015	*	-0.00016	0.00038	*
cg07627445	4	1029632	0.00053	<0.2		Island	0.878	-0.014	*	-0.00019	0.00035	*
cg10852698	6	46375852	0.00053	<0.2			0.857	-0.00073		7.5e-05	-0.00032	*
cg26996569	12	121829743	0.00053	<0.2			0.323	0.058	*	-0.00016	-9.4e-05
cg21939482	7	6388130	0.00054	<0.2	C7orf70	Shore	0.14	-0.0089	*	-5.5e-05	0.00024	*
cg26842596	19	15121297	0.00054	<0.2	CCDC105	Shore	0.482	0.063	*	5.3e-06	-9.7e-05
cg16197717	10	125650957	0.00054	<0.2	CPXM2	Island	0.192	-0.018		-2.1e-05	-0.00021
cg22836359	12	6933548	0.00054	<0.2	GPR162	Island	0.97	-0.012	*	4.8e-07	7.6e-05
cg05379634	19	1856726	0.00054	<0.2	KLF16	Island	0.127	0.02	*	0.00015	-0.00039	*
cg18322510	1	236686618	0.00054	<0.2	LGALS8	Shore	0.737	0.072	*	0.00028	-0.00038	*
cg22498676	1	226254585	0.00054	<0.2	LOC440926	Shelf	0.769	-0.037	*	-0.00019	0.00033	*
cg05856677	22	19739082	0.00054	<0.2		Shelf	0.822	-0.0091		3e-05	-0.00021	*
cg11518454	1	5286091	0.00054	<0.2			0.436	0.036		-0.00031	0.00056	*
cg26430027	9	137393288	0.00054	<0.2		Island	0.543	-0.012		-0.00035	0.00085	*
cg07189550	1	179851385	0.00054	<0.2	TOR1AIP1	Shore	0.143	0.0011		0.00018	-0.00029	*
cg18655522	14	69424756	0.00055	<0.2	ACTN1		0.602	0.034	*	3.3e-05	-7.1e-07
cg07891457	11	67442075	0.00055	<0.2	ALDH3B2		0.895	-0.022	*	-6.6e-06	9.1e-05
cg03986934	16	1248980	0.00055	<0.2	CACNA1H	Island	0.959	-0.014	*	-6.3e-05	0.00015	*
cg26485946	10	1094306	0.00055	<0.2	IDI1	Shore	0.18	-0.023	*	-0.00013	0.0002	*
cg09797463	10	90995297	0.00055	<0.2	LIPA		0.542	0.031	*	-3.6e-05	0.00014
cg11355029	19	6276660	0.00055	<0.2	MLLT1	Shelf	0.459	0.036	*	0.00012	-0.00041	*
cg02725013	4	5024327	0.00055	<0.2		Shelf	0.787	0.026	*	7.9e-05	-0.00036	*
cg08590257	6	159796425	0.00055	<0.2			0.847	0.014	*	-6.6e-05	0.0001
cg17046855	7	6749638	0.00055	<0.2		Shelf	0.734	0.025	*	5e-05	-5.1e-05
cg19385090	7	27292614	0.00055	<0.2		Shore	0.432	0.04	*	-0.00023	-7.5e-05
cg23145794	20	20433062	0.00055	<0.2	RALGAPA2	Shore	0.089	0.034	*	0.00018	-0.00036	*
cg12379463	4	146727004	0.00055	<0.2	ZNF827		0.764	0.014		0.00012	-0.00045	*
cg06547715	2	218990976	0.00056	<0.2	CXCR2		0.551	-0.061	*	-2.4e-05	-3.6e-05
cg08009275	17	79790191	0.00056	<0.2	FAM195B	Shore	0.178	0.022		0.00033	-0.00066	*
cg10872212	3	49209160	0.00056	<0.2	KLHDC8B	Island	0.178	-0.0047		-0.00013	0.00033	*
cg19358568	6	129614126	0.00056	<0.2	LAMA2		0.795	0.013	*	0.00013	-0.00022	*
cg11610702	7	39773227	0.00056	<0.2	LOC349114	Island	0.181	-0.032	*	8.1e-05	0.00011
cg08127108	2	8866448	0.00056	<0.2			0.918	-0.014	*	8.2e-06	5.7e-05
cg13908968	9	87188847	0.00056	<0.2			0.872	-0.019	*	8.4e-06	0.00013
cg22423750	5	2334419	0.00056	<0.2			0.598	0.047	*	6.4e-05	-0.00025
cg09825309	12	124990897	0.00056	<0.2	NCOR2		0.318	0.0042		0.00022	-0.00047	*
cg00901787	16	23606999	0.00056	<0.2	NDUFAB1	Shore	0.192	-0.028	*	-0.00016	0.00048	*
cg08542227	3	16926340	0.00056	<0.2	PLCL2	Island	0.057	-0.012	*	-9.2e-05	0.00023	*
cg01123035	21	48079700	0.00056	<0.2	PRMT2	Shore	0.817	0.012	*	0.00011	-0.00032	*
cg01742680	3	152879841	0.00056	<0.2	RAP2B	Island	0.468	0.013		-0.00014	0.00026	*
cg22575540	2	27505625	0.00056	<0.2	TRIM54		0.856	-0.0073		1.8e-05	-0.00025	*
cg20071491	12	52310432	0.00057	<0.2	ACVRL1	Shore	0.877	-0.00051		-0.00012	0.00024	*
cg12271487	6	109266451	0.00057	<0.2	ARMC2		0.51	0.048	*	1.2e-05	-0.00012
cg01616628	2	60761027	0.00057	<0.2	BCL11A		0.813	0.0052		0.00014	-0.00031	*
cg18219532	7	86781452	0.00057	<0.2	DMTF1	Shore	0.132	-0.013		-0.00016	0.00042	*
cg16213375	11	61584727	0.00057	<0.2	FADS1	Island	0.17	-0.032	*	-0.00014	0.00025	*
cg07106490	16	19895578	0.00057	<0.2	GPRC5B	Island	0.179	-0.029	*	-0.00025	0.00038	*
cg04746649	2	169401301	0.00057	<0.2	LASS6		0.898	-0.014	*	5.2e-05	-1.4e-05
cg21821231	11	1262890	0.00057	<0.2	MUC5B	Shore	0.754	0.024	*	1.7e-05	-0.00018	*
cg00095431	2	67775781	0.00057	<0.2			0.732	0.0019		-0.00022	0.00026	*
cg02835977	1	37782729	0.00057	<0.2		Shore	0.819	-0.018	*	0.00012	-0.00017
cg06999762	15	53093007	0.00057	<0.2		Shelf	0.457	0.055	*	-0.00012	5e-05
cg07458308	5	134827512	0.00057	<0.2		Island	0.168	0.027	*	0.00029	-0.00069	*
cg12299478	10	111935236	0.00057	<0.2			0.821	-0.014	*	2.5e-05	-7.3e-05
cg19127138	7	65196881	0.00057	<0.2			0.526	-0.067	*	-0.00014	0.0002
cg06992688	14	94491958	0.00057	<0.2	OTUB2	Shore	0.632	0.034	*	0.00026	-0.00071	*
cg11863058	11	72532613	0.00058	<0.2	ATG16L2	Island	0.9	-0.027	*	-3.2e-05	0.00027	*
cg13379983	2	198649727	0.00058	<0.2	BOLL	Shore	0.909	-0.018	*	2.2e-05	-0.00024
cg03662648	19	6481826	0.00058	<0.2	DENND1C		0.109	-0.021	*	7.7e-05	4.7e-05
cg13416129	9	140037808	0.00058	<0.2	GRIN1	Shelf	0.656	0.013		0.00031	-0.00062	*
cg21455600	7	66096806	0.00058	<0.2	KCTD7	Shelf	0.114	0.021	*	-9.9e-06	6.7e-06
cg07169660	17	41467212	0.00058	<0.2	LOC100130581		0.639	0.041	*	-6.1e-05	0.00015
cg03784611	3	196754501	0.00058	<0.2	MFI2	Shore	0.846	0.012	*	8.6e-05	-0.00021	*
cg07170300	12	59434386	0.00058	<0.2			0.183	0.0002		-0.00014	0.00034	*
cg08018143	4	162110754	0.00058	<0.2			0.714	-0.064	*	-2.9e-06	0.00034
cg09013220	17	45944385	0.00058	<0.2			0.821	0.015		-0.00012	0.00024	*
cg17878501	3	152215049	0.00058	<0.2			0.77	-0.013		0.00015	-0.00019	*
cg20438404	7	100770192	0.00058	<0.2	SERPINE1		0.193	-0.029	*	-0.00018	0.00044	*
cg12824106	5	55008239	0.00058	<0.2	SLC38A9	Island	0.1	-0.024	*	5.6e-05	6.7e-05
cg20136460	6	30128548	0.00058	<0.2	TRIM10		0.822	0.029	*	0.00013	-0.00021	*
cg04068601	20	2844713	0.00058	<0.2	VPS16		0.873	-0.023	*	-0.00012	-0.0001
cg21548749	6	32096524	0.00059	<0.2	ATF6B	Shore	0.367	0.03	*	0.00021	-0.00037	*
cg25469234	3	160822711	0.00059	<0.2	B3GALNT1	Island	0.225	-0.043	*	-0.0002	0.00055	*
cg23710492	11	46848442	0.00059	<0.2	CKAP5		0.218	-0.059	*	-0.00023	0.00034
cg05220090	19	1033606	0.00059	<0.2	CNN2	Island	0.807	0.0017		-0.00027	0.00034	*
cg18266783	1	156466729	0.00059	<0.2	MEF2D	Shelf	0.84	0.011		-0.00018	0.00032	*
cg08818297	5	44911232	0.00059	<0.2			0.786	-0.023	*	-0.0002	0.00039	*
cg09788416	12	39539408	0.00059	<0.2		Island	0.186	0.046	*	0.00031	-0.00088	*
cg11511795	4	10463749	0.00059	<0.2		Shore	0.398	0.064	*	0.00056	-0.00094	*
cg14776114	6	126069223	0.00059	<0.2		Island	0.176	-0.071	*	-0.00015	0.00054	*
cg19731065	14	97674065	0.00059	<0.2			0.732	0.034	*	0.00035	-0.00055	*
cg21687003	4	26806309	0.00059	<0.2			0.749	0.038	*	0.00014	-0.00045	*
cg06790860	16	69760301	0.00059	<0.2	NQO1	Island	0.093	-0.016	*	3.6e-06	7.6e-05
cg16766036	13	114800309	0.00059	<0.2	RASA3	Shelf	0.648	0.052	*	-1.3e-05	8.8e-05
cg25840433	6	167104903	0.00059	<0.2	RPS6KA2		0.436	0.022	*	-5.9e-05	7.3e-05
cg02131853	4	39034637	0.00059	<0.2	TMEM156		0.54	0.025	*	-0.00012	1.5e-05
cg07374808	18	34974004	0.0006	<0.2	BRUNOL4	Island	0.14	-0.026	*	-0.0002	0.00033	*
cg24311416	11	115138615	0.0006	<0.2	CADM1		0.814	-0.025	*	0.00012	-0.00025
cg14168316	9	127642782	0.0006	<0.2	GOLGA1		0.844	0.0012		9.3e-05	-0.0003	*
cg18606843	7	155348191	0.0006	<0.2			0.647	0.05	*	0.00026	-0.00096	*
cg08015496	1	160314061	0.0006	<0.2	NCSTN	Shore	0.674	-0.011		-0.00037	0.00066	*
cg11385003	21	45148332	0.0006	<0.2	PDXK	Shore	0.152	0.033	*	7.7e-06	-1.2e-05
cg13618045	19	12913155	0.0006	<0.2	PRDX2	Shore	0.174	0.033	*	-1.8e-05	-9.4e-05
cg26792295	3	16540091	0.0006	<0.2	RFTN1		0.622	-0.028		9.4e-05	-0.00033
cg11142556	17	80773629	0.0006	<0.2	TBCD	Shore	0.678	0.029	*	-0.00015	0.00016
cg00576086	5	1269066	0.0006	<0.2	TERT	Shore	0.72	0.014		-5.9e-05	0.00038	*
cg23815646	8	131961143	0.00061	<0.2	ADCY8		0.084	0.034	*	0.00016	-0.00034	*
cg19861427	19	18830612	0.00061	<0.2	CRTC1	Island	0.698	0.014		-5.8e-05	0.00028	*
cg23172480	6	117802786	0.00061	<0.2	DCBLD1	Shore	0.243	0.027	*	0.00026	-0.00066	*
cg14821257	15	50642820	0.00061	<0.2	GABPB1	Shelf	0.669	-0.039	*	-0.00026	0.00045	*
cg22196977	2	128263013	0.00061	<0.2	IWS1		0.683	0.025	*	7.2e-07	-0.00024	*
cg07002540	2	85281128	0.00061	<0.2	KCMF1		0.607	0.037	*	4.4e-05	0.00015
cg14691388	8	140711270	0.00061	<0.2	KCNK9	Shelf	0.897	-0.012	*	-0.00013	0.00026	*
cg27628090	18	2538512	0.00061	<0.2	METTL4		0.81	0.034	*	7.9e-05	-0.0002
cg19849728	4	111536767	0.00061	<0.2		Shelf	0.17	0.018		0.00021	-0.00049	*
cg20920549	13	112837467	0.00061	<0.2			0.644	-0.016		0.00014	-0.0003	*
cg22705959	2	208635887	0.00061	<0.2		Shore	0.224	0.036	*	8.7e-05	-0.00047	*
cg07140188	2	190627930	0.00061	<0.2	OSGEPL1		0.043	0.0006		-2.8e-05	0.0001	*
cg12589112	8	143333518	0.00061	<0.2	TSNARE1	Island	0.749	-0.017		0.00021	-0.00033	*
cg21785710	2	63662027	0.00062	<0.2	C2orf86		0.862	0.0095		0.0001	-0.0003	*
cg03016991	12	109124380	0.00062	<0.2	CORO1C	Island	0.121	-0.033	*	-0.00013	0.00036	*
cg11772527	13	94161642	0.00062	<0.2	GPC6		0.81	0.004		-0.00013	0.00034	*
cg16716514	6	29892952	0.00062	<0.2	HCG4P6	Shore	0.799	-0.0017		0.00017	-0.00027	*
cg01005303	1	11985115	0.00062	<0.2	KIAA2013	Shore	0.693	-0.021		0.00011	-0.00029
cg22759265	2	27998164	0.00062	<0.2	MRPL33	Shelf	0.797	-0.023	*	-0.00031	0.0005	*
cg13955758	9	122790026	0.00062	<0.2			0.522	0.026	*	-0.00013	0.0002
cg25244921	15	65342634	0.00062	<0.2	OSTBETA		0.635	-0.0058		-0.0002	0.00054	*
cg00325918	2	111498847	0.00063	<0.2	ACOXL		0.587	0.022	*	-0.0002	0.00023
cg14141741	7	947428	0.00063	<0.2	ADAP1	Island	0.771	-0.015		-0.00022	0.00051	*
cg03022680	3	194117679	0.00063	<0.2	GP5	Island	0.124	0.023	*	0.00015	-0.00054	*
cg11224946	1	3487867	0.00063	<0.2	MEGF6		0.699	-0.0075		0.0002	-0.00033	*
cg13985234	5	138582143	0.00063	<0.2			0.256	0.027	*	0.0001	-0.00028	*
cg00530414	16	18800193	0.00063	<0.2	RPS15A	Shore	0.595	-0.034	*	-0.00013	-6.4e-05
cg19375479	19	44952604	0.00063	<0.2	ZNF229	Island	0.21	-0.026	*	-2.2e-05	4.2e-05
cg26475742	7	150551373	0.00064	<0.2	ABP1	Shelf	0.715	0.014	*	0.00015	-0.00036	*
cg07773022	8	68256273	0.00064	<0.2	ARFGEF1	Island	0.155	0.011	*	0.00015	-0.00027	*
cg27098574	16	75285489	0.00064	<0.2	BCAR1	Island	0.32	-0.024		0.00011	-0.00038	*
cg24743237	2	242702932	0.00064	<0.2	D2HGDH		0.868	-0.026	*	-1.8e-05	7.6e-06
cg15882591	13	21608557	0.00064	<0.2	LATS2		0.713	-0.05	*	-0.0004	0.00069	*
cg04452534	5	56133370	0.00064	<0.2	MAP3K1		0.819	0.001		-0.00015	0.00037	*
cg02618300	12	54346859	0.00064	<0.2		Island	0.136	0.021	*	0.00022	-0.00044	*
cg26353287	5	42954090	0.00064	<0.2		Shore	0.849	0.002		0.00013	-0.00029	*
cg20288630	4	120550423	0.00064	<0.2	PDE5A	Shore	0.187	-0.03	*	-0.00018	0.00039	*
cg22614327	1	17750198	0.00064	<0.2	RCC2	Shelf	0.79	-0.042	*	-0.0002	0.00041	*
cg20054786	4	38799406	0.00064	<0.2	TLR1		0.823	0.022	*	3.5e-05	-2.6e-05
cg03800765	3	11313984	0.00065	<0.2	ATG7	Island	0.36	0.017		-0.00016	0.00025
cg20795701	6	32295229	0.00065	<0.2	C6orf10		0.39	0.0062		-0.00027	0.00051	*
cg08801446	2	36626126	0.00065	<0.2	CRIM1		0.833	0.011		0.00022	-0.0004	*
cg07352425	1	15573655	0.00065	<0.2	FHAD1	Island	0.094	0.013	*	-2.8e-05	-4.5e-05
cg13319772	11	77927254	0.00065	<0.2	GAB2		0.884	-0.0038		8.3e-05	-0.00017	*
cg10859930	10	48426124	0.00065	<0.2	GDF10	Shelf	0.897	-0.021	*	-0.00011	0.0003	*
cg22862450	1	40025411	0.00065	<0.2	LOC728448		0.546	0.07	*	0.00034	-0.00036
cg03897452	12	130707370	0.00065	<0.2			0.716	0.047	*	0.00021	-0.00056	*
cg06912918	2	69171302	0.00065	<0.2			0.364	-0.037	*	4.2e-05	0.00035	*
cg14384416	2	193393	0.00065	<0.2			0.782	-0.0072		4e-05	-0.0003	*
cg18509524	8	62052594	0.00065	<0.2		Shore	0.178	0.046	*	0.00016	-0.00048	*
cg24057701	13	112278928	0.00065	<0.2		Shelf	0.912	-0.018	*	-0.00013	0.00022	*
cg25163076	22	18531591	0.00065	<0.2		Shore	0.4	0.1	*	0.00013	-0.00035
cg15903666	1	3342691	0.00065	<0.2	PRDM16	Island	0.898	-0.0014		-9.9e-05	0.00029	*
cg24946795	12	52115674	0.00065	<0.2	SCN8A	Island	0.234	0.045	*	0.00024	-0.0008	*
cg20392616	7	135392013	0.00065	<0.2	SLC13A4		0.875	0.013		7.1e-05	-0.00024	*
cg06856735	17	77952247	0.00065	<0.2	TBC1D16	Island	0.82	0.021	*	-6.9e-05	6.3e-05
cg18060330	6	32376066	0.00066	<0.2	BTNL2		0.671	0.11	*	0.00044	-0.0005
cg25666995	7	37421924	0.00066	<0.2	ELMO1		0.858	0.027	*	0.00012	-0.00022	*
cg10531986	9	132652466	0.00066	<0.2	FNBP1	Island	0.762	-0.0043		0.00023	-0.00042	*
cg15166332	10	35929604	0.00066	<0.2	FZD8	Island	0.092	0.0028		7.4e-05	-0.00029	*
cg13901526	2	127414455	0.00066	<0.2	GYPC	Shore	0.092	-0.01		-0.00015	0.00028	*
cg13369099	7	3313269	0.00066	<0.2			0.768	-0.012		0.00014	-0.00018
cg14396619	7	98424185	0.00066	<0.2			0.737	-0.052	*	-0.00024	0.00055	*
cg19049754	10	81966990	0.00066	<0.2		Island	0.827	0.025	*	-5.2e-05	1.8e-05
cg26914865	19	13735016	0.00066	<0.2			0.381	-0.041		-0.00056	0.00096	*
cg01938023	5	138855699	0.00066	<0.2	TMEM173		0.368	0.034	*	0.00011	-0.00019
cg05516004	21	46496180	0.00067	<0.2	ADARB1	Shore	0.88	-0.0057		-7.2e-05	0.00027	*
cg18240400	10	46168597	0.00067	<0.2	ANUBL1	Island	0.408	0.032	*	0.0003	-0.00045	*
cg02115416	3	2940073	0.00067	<0.2	CNTN4		0.807	0.028	*	8.3e-05	-0.00013
cg01429859	1	16163775	0.00067	<0.2	FLJ37453	Island	0.235	0.056	*	6.2e-05	-0.00045	*
cg01226742	8	37699923	0.00067	<0.2	GPR124	Island	0.381	0.082	*	0.00016	-0.00049	*
cg08939418	7	23511443	0.00067	<0.2	IGF2BP3	Shore	0.16	0.037	*	2.9e-05	-0.00017
cg05469885	3	124103652	0.00067	<0.2	KALRN		0.805	0.0081		-0.00019	0.00037	*
cg20018106	4	21768009	0.00067	<0.2	KCNIP4		0.884	0.0069		0.00022	-0.00034	*
cg15819739	6	33362603	0.00067	<0.2	KIFC1	Shelf	0.745	0.022	*	0.00014	-0.00033	*
cg23815825	11	1929483	0.00067	<0.2			0.898	-0.02	*	-6e-05	4.9e-05
cg27534957	2	174265733	0.00067	<0.2			0.423	-0.1	*	-0.00054	0.0011	*
cg05387189	8	31498345	0.00067	<0.2	NRG1	Island	0.252	0.03	*	7e-05	-0.00013
cg00614959	4	720870	0.00067	<0.2	PCGF3	Shelf	0.938	0.00033		9.5e-05	-0.00028	*
cg04749631	6	83904091	0.00067	<0.2	PGM3	Shore	0.291	-0.027	*	-0.00018	0.00071	*
cg08842021	6	45481731	0.00067	<0.2	RUNX2		0.897	-0.013	*	6.3e-05	-0.00012
cg11737030	6	30071295	0.00067	<0.2	TRIM31	Island	0.091	-0.0038		-6.5e-05	0.00021	*
cg13352836	16	31228263	0.00067	<0.2	TRIM72	Island	0.145	-0.018		-7.5e-05	0.00053	*
cg08317891	17	79098403	0.00068	<0.2	AATK	Shore	0.834	0.0066		7.9e-05	-0.00036	*
cg08276645	2	241459502	0.00068	<0.2	ANKMY1	Shore	0.631	0.065	*	0.00014	-0.00038
cg10138494	2	14772562	0.00068	<0.2	FAM84A	Island	0.239	-0.05	*	-0.00017	0.00025
cg04297819	1	22260125	0.00068	<0.2	HSPG2		0.482	0.037	*	-5e-05	-0.00018
cg08830588	12	49939540	0.00068	<0.2	KCNH3	Shelf	0.684	0.0059		0.0002	-0.00033	*
cg07132326	6	150258058	0.00068	<0.2		Shore	0.267	-0.064	*	0.00015	0.00014
cg16292181	6	72254462	0.00068	<0.2			0.796	0.00069		0.00011	-0.00035	*
cg17263206	5	154071247	0.00068	<0.2		Shore	0.279	0.071	*	0.00025	-0.00031
cg21075678	7	137557164	0.00068	<0.2			0.818	0.028	*	0.00012	-0.00025	*
cg08830492	1	204899141	0.00068	<0.2	NFASC		0.823	-0.0059		-0.0002	0.00026	*
cg05064673	1	29562604	0.00068	<0.2	PTPRU	Shore	0.048	0.023	*	-4e-05	3.4e-05
cg06936803	4	186559938	0.00068	<0.2	SORBS2	Shore	0.44	-0.042	*	-0.00014	0.00071	*
cg14642045	12	109538736	0.00068	<0.2	UNG	Shelf	0.602	0.0026		5.2e-05	-0.0005	*
cg24370881	4	10112059	0.00068	<0.2	WDR1		0.81	0.024	*	0.00018	-0.0005	*
cg08745665	4	10460009	0.00068	<0.2	ZNF518B	Shore	0.802	0.034	*	0.0001	-0.00024	*
cg13293535	8	11597251	0.00069	<0.2	GATA4		0.76	-0.1	*	-0.00022	0.00072	*
cg27633530	7	50344294	0.00069	<0.2	IKZF1	Island	0.12	0.021	*	0.00028	-0.00048	*
cg05743713	11	66885240	0.00069	<0.2	KDM2A	Shore	0.126	0.034	*	4.1e-05	-0.00048	*
cg00466898	10	13089772	0.00069	<0.2			0.797	-0.047	*	-0.00014	0.00037	*
cg03060590	7	155348125	0.00069	<0.2			0.913	-0.00033		0.00011	-0.00042	*
cg16673768	2	219828170	0.00069	<0.2		Island	0.224	-0.031	*	0.00011	-0.00013
cg19407943	2	130031761	0.00069	<0.2			0.687	0.021	*	1.1e-05	-3.8e-05
cg25512537	17	76250053	0.00069	<0.2		Shore	0.273	0.0025		-0.00015	0.00058	*
cg09119797	1	35658164	0.00069	<0.2	SFPQ	Island	0.127	-0.0023		-0.00012	0.00033	*
cg12898019	17	74621049	0.00069	<0.2	ST6GALNAC1		0.437	-0.012		0.00019	-0.00062	*
cg07065759	2	198017462	0.0007	<0.2	ANKRD44		0.195	0.037	*	1.3e-06	3.2e-05
cg22356339	12	103352454	0.0007	<0.2	ASCL1	Island	0.167	-0.0093		-0.00027	0.00059	*
cg14068309	12	124105880	0.0007	<0.2	EIF2B1		0.835	0.0082		-7.7e-05	0.00027	*
cg06871529	13	32700732	0.0007	<0.2	FRY		0.82	0.03	*	5.1e-05	-0.0003	*
cg08468283	1	2270516	0.0007	<0.2	MORN1		0.87	0.011	*	0.00015	-0.00024	*
cg06965195	1	4390452	0.0007	<0.2			0.354	0.048	*	0.00033	-0.00074	*
cg10399099	16	51169072	0.0007	<0.2		Island	0.364	0.032		-1.2e-06	0.0005	*
cg01456691	6	11382556	0.0007	<0.2	NEDD9		0.17	0.029	*	0.00024	-0.0004	*
cg25772559	18	43913719	0.0007	<0.2	RNF165	Island	0.046	0.012	*	2.1e-05	-0.00012	*
cg09400123	16	29324046	0.0007	<0.2	RUNDC2C		0.847	0.026	*	1.6e-05	-5.3e-05
cg10379687	20	44175957	0.0007	<0.2	SPINLW1		0.818	0.0041		0.00015	-0.00038	*
cg06430387	10	60094511	0.0007	<0.2	UBE2D1	Shore	0.767	-0.029	*	0.00012	-0.00031
cg02396253	6	135271056	0.00071	<0.2	ALDH8A1		0.857	-0.021	*	-0.00012	9.9e-05
cg04558386	6	13815568	0.00071	<0.2	CCDC90A	Shore	0.652	0.035	*	-3.9e-05	0.00012
cg24120825	3	122102053	0.00071	<0.2	FAM162A	Shore	0.195	0.0011		8.7e-05	-0.00031	*
cg16925459	7	18548581	0.00071	<0.2	HDAC9		0.371	0.045	*	0.00016	-0.0006	*
cg03177042	6	166422671	0.00071	<0.2		Shore	0.286	0.026		-0.00022	0.00043	*
cg03444184	11	49456196	0.00071	<0.2		Island	0.86	0.0059		7e-05	-0.00028	*
cg21695089	17	79273418	0.00071	<0.2		Shelf	0.325	-0.0076		-0.00037	0.0006	*
cg02797195	21	43185674	0.00071	<0.2	RIPK4	Shore	0.771	-0.068	*	4.1e-05	0.00012
cg03480935	15	67417860	0.00071	<0.2	SMAD3		0.602	0.039	*	0.00013	-0.00039	*
cg17679453	3	55518121	0.00071	<0.2	WNT5A	Shore	0.157	0.034	*	0.00015	-0.0004	*
cg26931990	16	1661230	0.00072	<0.2	IFT140	Island	0.652	-0.053	*	-6e-05	0.00036
cg15684162	17	61712639	0.00072	<0.2	MAP3K3		0.873	0.0058		-5e-05	0.00019	*
cg04453471	10	30726531	0.00072	<0.2	MAP3K8	Shelf	0.45	-0.022		0.00019	-0.00039	*
cg00501542	1	202995246	0.00072	<0.2		Shore	0.837	0.03	*	-0.00016	4e-06
cg01545223	19	22801034	0.00072	<0.2		Island	0.648	0.035	*	-0.00026	0.00038	*
cg01695255	13	35350760	0.00072	<0.2			0.835	-0.0053		-0.00011	0.00039	*
cg03377980	7	1363035	0.00072	<0.2		Island	0.292	-0.056	*	-0.00014	0.0005	*
cg04680393	6	168686460	0.00072	<0.2		Island	0.753	0.012		-0.00017	0.00016
cg12978105	14	38092175	0.00072	<0.2		Island	0.319	0.095	*	0.00011	-8.6e-06
cg21158664	7	159870	0.00072	<0.2		Island	0.897	0.0038		0.0001	-0.00015	*
cg24601327	1	96526353	0.00072	<0.2			0.795	-0.0099		2.6e-05	-0.00022	*
cg06883544	14	77732283	0.00072	<0.2	NGB		0.852	-0.01		-0.00016	0.00028	*
cg09482050	16	67686832	0.00072	<0.2	RLTPR	Shore	0.757	0.0014		0.00039	-0.00084	*
cg25416372	19	10628014	0.00072	<0.2	S1PR5	Island	0.199	-0.028	*	-7.5e-05	3.4e-05
cg00514628	22	30819337	0.00072	<0.2	SEC14L2	Shore	0.11	-0.012	*	-0.00019	0.00033	*
cg27243685	21	43642366	0.00073	<0.2	ABCG1	Shelf	0.826	0.02	*	0.00011	-0.00033	*
cg25309343	19	51226207	0.00073	<0.2	CLEC11A	Shore	0.457	0.026	*	-0.00021	0.00025
cg21183461	15	45427297	0.00073	<0.2	DUOX1	Island	0.194	0.035	*	3e-05	-0.00016
cg23278235	12	133101168	0.00073	<0.2	FBRSL1	Shore	0.78	0.026	*	0.00016	-0.00028	*
cg24910352	8	11601603	0.00073	<0.2	GATA4		0.36	-0.053	*	-6.1e-05	0.00045	*
cg23165500	5	152949095	0.00073	<0.2	GRIA1		0.852	-0.011		9.3e-05	-0.00021	*
cg07655479	4	144480551	0.00073	<0.2	LOC441046	Island	0.128	-0.023	*	-7.3e-05	0.00017	*
cg26511585	22	43810812	0.00073	<0.2	MPPED1	Shelf	0.797	0.016		0.00014	-0.00042	*
cg04216235	5	172738061	0.00073	<0.2			0.775	-0.013		8.7e-05	-0.00014
cg16142914	8	143254530	0.00073	<0.2			0.693	0.0055		0.00025	-0.00052	*
cg19369022	19	51111388	0.00073	<0.2		Island	0.311	-0.058	*	-0.00016	9.8e-05
cg23561979	2	42329535	0.00073	<0.2		Island	0.236	0.041	*	-6.8e-05	-0.00012
cg09222892	1	25734099	0.00073	<0.2	RHCE		0.795	-0.024		-0.00028	0.00065	*
cg08643003	11	15997706	0.00073	<0.2	SOX6		0.876	0.00046		5.9e-05	-0.00024	*
cg12692919	8	143395441	0.00073	<0.2	TSNARE1	Shore	0.412	0.027	*	0.00015	-0.00027	*
cg17988320	7	30361459	0.00073	<0.2	ZNRF2		0.502	0.028		-0.00023	0.00042
cg19502671	13	114129004	0.00074	<0.2	DCUN1D2		0.547	0.031	*	-8.6e-05	0.00012
cg04137490	8	25176732	0.00074	<0.2	DOCK5		0.94	-0.013	*	4.7e-05	-5.2e-05
cg03624871	6	317607	0.00074	<0.2	DUSP22		0.81	-0.0056		0.0002	-0.00053	*
cg18176842	2	14776096	0.00074	<0.2	FAM84A	Shore	0.195	0.045	*	0.00013	-0.00035	*
cg07805911	7	818287	0.00074	<0.2	HEATR2	Shelf	0.873	-0.0085		-6e-05	0.00025	*
cg05049312	14	93406016	0.00074	<0.2	ITPK1		0.805	-0.03	*	7.3e-05	-0.0002
cg23626733	1	2345398	0.00074	<0.2	PEX10	Shore	0.678	-0.036	*	-0.0002	0.00058	*
cg22328837	6	45422120	0.00074	<0.2	RUNX2		0.544	0.031	*	-0.00031	0.00028
cg08826738	6	105585351	0.00075	<0.2	BVES	Island	0.204	0.019		0.00014	-0.00051	*
cg06591466	14	96505869	0.00075	<0.2	C14orf132	Island	0.115	-0.008		0.00014	-0.0002	*
cg12187567	8	95907389	0.00075	<0.2	CCNE2	Island	0.25	0.0012		-0.00019	0.00038	*
cg14370314	14	23834891	0.00075	<0.2	EFS	Island	0.177	0.037	*	0.0005	-0.00088	*
cg08183577	10	69609793	0.00075	<0.2		Shore	0.396	-0.066	*	-0.00022	0.00088	*
cg10567744	10	130829670	0.00075	<0.2			0.66	-0.035	*	-0.00013	-6.9e-05
cg12256688	12	131200855	0.00075	<0.2		Shore	0.353	-0.05	*	-0.0001	0.00046	*
cg15627136	13	112986635	0.00075	<0.2		Shore	0.725	0.036		0.00044	-0.00075	*
cg19167793	15	25842536	0.00075	<0.2		Shore	0.741	0.023		0.00035	-0.00062	*
cg19332650	22	31086763	0.00075	<0.2		Shelf	0.874	-0.009		-0.00014	0.00027	*
cg04897931	17	152089	0.00075	<0.2	RPH3AL	Shore	0.88	-0.024		-0.00014	0.0004	*
cg04204669	11	2193742	0.00075	<0.2	TH		0.627	-0.037	*	-6.8e-05	0.00025	*
cg12179635	1	175571970	0.00075	<0.2	TNR	Shelf	0.796	0.031	*	9.9e-05	-0.00023	*
cg25148733	12	49716596	0.00075	<0.2	TROAP	Shore	0.096	0.015	*	4e-05	-5.9e-05
cg00307662	16	29917305	0.00076	<0.2	ASPHD1		0.871	-0.017	*	-0.00018	0.00028	*
cg26803837	1	186344613	0.00076	<0.2	C1orf27	Island	0.095	-0.011		-0.0002	0.00038	*
cg13814761	6	3724522	0.00076	<0.2	C6orf145		0.936	-0.012	*	-0.00016	0.00024	*
cg20534702	7	4752170	0.00076	<0.2	FOXK1		0.851	-0.0037		0.00021	-0.00024	*
cg10753836	2	176989485	0.00076	<0.2	HOXD9	Island	0.395	-0.032		-0.00053	0.00084	*
cg04168474	16	1128865	0.00076	<0.2	LOC146336	Island	0.774	-0.035	*	-0.00032	0.00072	*
cg13870494	9	72658358	0.00076	<0.2	MAMDC2	Shore	0.774	0.0022		-0.00022	0.00032	*
cg03720390	6	28912126	0.00076	<0.2			0.258	0.024	*	0.00022	-0.00062	*
cg06822067	10	31108101	0.00076	<0.2			0.703	0.045	*	-0.00011	-0.00015
cg16717578	19	867030	0.00076	<0.2		Island	0.918	-0.023	*	-9.8e-05	0.00033	*
cg24611970	2	159790917	0.00076	<0.2			0.772	0.017		5.2e-06	-0.00051	*
cg26314722	1	234867300	0.00076	<0.2			0.248	0.033	*	-6.4e-05	4e-06
cg02923856	3	23989124	0.00076	<0.2	NR1D2	Shore	0.784	0.0031		-0.00016	0.00032	*
cg11065621	8	82606061	0.00076	<0.2	SLC10A5		0.292	-0.059	*	-0.00031	0.00074	*
cg17190930	7	100450160	0.00076	<0.2	SLC12A9	Island	0.188	0.0023		-9.9e-05	0.00033	*
cg00301998	20	62437492	0.00076	<0.2	ZBTB46	Shore	0.874	-0.021	*	1.6e-05	5.8e-05
cg12458039	7	210075	0.00077	<0.2	FAM20C	Shelf	0.834	0.035	*	0.00024	2.8e-05
cg20000940	14	52327486	0.00077	<0.2	GNG2		0.168	-0.035	*	-1.1e-05	6.9e-05
cg18164599	4	175443867	0.00077	<0.2	HPGD	Shore	0.104	0.024	*	8.7e-05	-0.00022	*
cg06586505	13	112611028	0.00077	<0.2		Island	0.87	0.024	*	8.1e-05	-0.00028	*
cg07116336	16	88337645	0.00077	<0.2			0.634	-0.0046		-0.00013	0.00047	*
cg14630993	9	7274452	0.00077	<0.2			0.739	-0.045	*	-0.00011	0.00031	*
cg01132407	4	645781	0.00077	<0.2	PDE6B	Shore	0.699	-0.13	*	-0.00012	0.00013
cg25819341	17	80826800	0.00077	<0.2	TBCD	Shore	0.893	-0.011	*	8.8e-05	-6.7e-05
cg18794473	8	77617694	0.00077	<0.2	ZFHX4		0.853	-0.034	*	-0.00011	0.00037	*
cg05270007	6	118881378	0.00078	<0.2	C6orf204		0.883	0.013	*	0.00011	-0.00031	*
cg15986634	11	65668760	0.00078	<0.2	FOSL1	Shore	0.93	-0.011	*	4.1e-05	-2.2e-05
cg04052570	14	88459528	0.00078	<0.2	GALC	Island	0.191	-0.023	*	-9.7e-05	0.00015
cg11644515	21	35827824	0.00078	<0.2	KCNE1	Shelf	0.903	-0.0082		4.7e-05	-0.00019	*
cg20776619	7	78415591	0.00078	<0.2	MAGI2		0.822	-0.0084		0.00017	-0.00044	*
cg12700853	17	12568624	0.00078	<0.2	MYOCD	Shore	0.367	-0.061	*	0.00037	-0.00034
cg00782200	2	145280523	0.00078	<0.2		Shore	0.567	-0.0083		0.00026	-0.00065	*
cg07009376	6	28793219	0.00078	<0.2			0.276	-0.083	*	-0.00019	0.0002
cg19279310	11	47413087	0.00078	<0.2		Shelf	0.282	0.02	*	-7.8e-05	0.00016
cg11692070	7	102790406	0.00078	<0.2	NAPEPLD	Shore	0.841	0.023	*	0.00013	-0.00028	*
cg23120335	2	148778288	0.00078	<0.2	ORC4L	Island	0.122	-0.0029		-0.00023	0.00034	*
cg06069407	13	114187548	0.00078	<0.2	TMCO3	Shore	0.846	0.015	*	9.5e-05	-0.00023	*
cg23393728	7	134519692	0.00079	<0.2	CALD1		0.813	0.0061		-0.00019	0.00029	*
cg18025831	3	53321215	0.00079	<0.2	DCP1A		0.676	-0.053	*	-6e-05	0.00011
cg01263942	10	695859	0.00079	<0.2	DIP2C		0.537	0.011		0.00052	-0.00077	*
cg07924653	4	16883525	0.00079	<0.2	LDB2		0.87	0.023	*	-1.4e-05	-1.9e-05
cg03143365	19	12777903	0.00079	<0.2	MAN2B1	Shore	0.103	-0.013	*	-0.00011	0.00031	*
cg00568910	1	43429380	0.00079	<0.2			0.469	-0.00045		-0.00018	0.00056	*
cg00660167	17	80200974	0.00079	<0.2		Shore	0.732	-0.036		2.3e-05	-0.00044
cg10081626	10	103326216	0.00079	<0.2		Shore	0.691	-0.061	*	-6.5e-05	0.00043	*
cg21399703	1	247681439	0.00079	<0.2		Island	0.725	0.086	*	-0.00011	-0.00043
cg20811607	6	109760831	0.00079	<0.2	PPIL6	Shore	0.844	0.026	*	0.0002	-0.00036	*
cg08106792	1	153509323	0.00079	<0.2	S100A6	Shore	0.358	0.029	*	0.00013	-4.6e-06
cg00811166	5	1288569	0.00079	<0.2	TERT	Shore	0.804	0.0048		-0.00019	0.00033	*
cg04884090	3	49894441	0.00079	<0.2	TRAIP	Shore	0.416	0.063	*	0.00011	-0.00021
cg26327732	5	125931120	0.0008	<0.2	ALDH7A1	Shore	0.107	-0.0071		-0.00011	0.00028	*
cg25876882	15	24921784	0.0008	<0.2	C15orf2	Shore	0.846	-0.015		-0.00037	0.0005	*
cg10775273	2	219857927	0.0008	<0.2	CRYBA2	Island	0.132	-0.039	*	-0.00012	0.00017
cg19802458	7	100888750	0.0008	<0.2	FIS1	Shore	0.461	-0.067	*	-0.00017	0.00024
cg18442524	5	137610372	0.0008	<0.2	GFRA3	Shore	0.212	0.046	*	0.00027	-0.00058	*
cg19444998	12	133352427	0.0008	<0.2	GOLGA3	Shelf	0.857	0.002		0.00015	-0.00024	*
cg14479344	3	108126795	0.0008	<0.2	MYH15		0.345	0.028	*	-7.1e-06	0.00011
cg19754658	12	117147650	0.0008	<0.2			0.826	-0.044	*	1.9e-05	0.00023
cg08772206	10	82297793	0.0008	<0.2	SH2D4B	Shore	0.838	-0.0062		-7.9e-05	0.00024	*
cg19920353	19	49828413	0.0008	<0.2	SLC6A16	Island	0.83	0.025	*	7.4e-05	-0.00023	*
cg12895674	3	63496618	0.0008	<0.2	SYNPR		0.489	0.053	*	0.00012	-0.00042	*
cg06046705	4	125634632	0.00081	<0.2	ANKRD50	Shore	0.253	0.00041		0.00045	-0.00062	*
cg22428691	1	223926325	0.00081	<0.2	CAPN2		0.904	0.00075		0.00013	-0.00033	*
cg05478779	15	78633437	0.00081	<0.2	CRABP1	Island	0.218	-0.027	*	-0.00024	0.00068	*
cg23548163	19	46807119	0.00081	<0.2	HIF3A	Island	0.801	-0.0018		-0.00069	0.00087	*
cg04458985	12	5021107	0.00081	<0.2	KCNA1	Island	0.834	0.015	*	0.00013	-0.00024	*
cg22533281	1	70509936	0.00081	<0.2	LRRC7		0.814	0.0085		8.2e-05	-0.00028	*
cg09565310	5	112541553	0.00081	<0.2	MCC		0.879	-0.022	*	-0.00017	0.00032	*
cg01131388	3	157548511	0.00081	<0.2			0.878	-0.024	*	-0.0001	0.0002	*
cg02313554	10	125731617	0.00081	<0.2		Shore	0.516	0.089	*	0.00024	-0.0003
cg03724229	2	173036250	0.00081	<0.2		Shore	0.618	0.03	*	0.00014	-0.00047	*
cg12526614	5	113671086	0.00081	<0.2			0.856	-0.0067		-0.00015	0.00032	*
cg19953847	13	112511776	0.00081	<0.2			0.724	-0.026	*	-2.3e-05	0.0001
cg04106201	7	39332739	0.00081	<0.2	POU6F2		0.801	0.035	*	0.00017	-0.0004	*
cg23081397	3	9291180	0.00081	<0.2	SRGAP3		0.078	0.00046		-4e-05	0.00013	*
cg00033371	19	4956786	0.00081	<0.2	UHRF1	Shore	0.943	0.0073	*	-1.4e-05	2.4e-05
cg14522800	17	4648566	0.00081	<0.2	ZMYND15		0.155	0.032	*	0.00012	-0.00052	*
cg15401913	10	126695653	0.00082	<0.2	CTBP2		0.85	-0.015	*	-0.00015	0.00028	*
cg10585486	19	41304133	0.00082	<0.2	EGLN2	Shore	0.222	-0.041	*	4.5e-06	0.00013
cg15198068	22	19843949	0.00082	<0.2	GNB1L	Shore	0.726	-0.024	*	-6.5e-05	-3.2e-05
cg04055874	17	16282434	0.00082	<0.2		Shore	0.889	0.012	*	0.00011	-0.00021	*
cg18573327	12	115123875	0.00082	<0.2		Shore	0.186	0.041	*	-4.1e-05	6.5e-05
cg23348700	14	102143967	0.00082	<0.2			0.896	-0.0017		3.2e-05	-0.0002	*
cg06937357	14	105837270	0.00082	<0.2	PACS2	Shore	0.289	-0.041	*	-0.00038	0.00056	*
cg19282250	9	79328522	0.00082	<0.2	PRUNE2		0.807	-0.0058		-0.00034	0.00043	*
cg09961100	19	5978428	0.00082	<0.2	RANBP3	Island	0.128	-0.0098		-0.00011	0.00033	*
cg02886263	16	14403144	0.00083	<0.2	MIR365-1		0.149	0.04	*	6.4e-05	-0.00021
cg10321236	11	76849101	0.00083	<0.2	MYO7A	Island	0.563	0.063	*	6.2e-05	-0.00012
cg02133624	3	195590041	0.00083	<0.2			0.682	-0.041	*	-0.00018	0.00022
cg12881854	4	54961668	0.00083	<0.2		Shelf	0.17	-0.018	*	-0.00018	0.00046	*
cg14003022	4	3043019	0.00083	<0.2		Island	0.81	-0.061	*	-0.00016	0.00041	*
cg14462369	6	168771343	0.00083	<0.2		Island	0.872	-0.019	*	-0.00033	0.0004	*
cg16028336	1	200194941	0.00083	<0.2			0.797	0.016	*	4.6e-05	-0.00022	*
cg24804948	5	87988507	0.00083	<0.2		Shelf	0.282	-0.052	*	-0.00014	0.0009	*
cg26845430	10	72384603	0.00083	<0.2			0.955	-0.0099	*	-2.3e-05	0.00014	*
cg11911122	8	71316769	0.00083	<0.2	NCOA2	Island	0.146	-0.041	*	-0.00026	0.00031	*
cg02497700	1	244213358	0.00083	<0.2	ZNF238	Shore	0.195	-0.037	*	7.2e-05	0.00075	*
cg17306339	12	124198578	0.00084	<0.2	ATP6V0A2	Shore	0.721	-0.037	*	-0.00013	0.00035	*
cg21268422	21	42620091	0.00084	<0.2	BACE2	Shelf	0.797	0.0078		0.0003	-0.00074	*
cg22506059	22	37916157	0.00084	<0.2	CARD10	Shore	0.915	-0.019	*	-3e-05	9.3e-05
cg25041901	10	134000400	0.00084	<0.2	DPYSL4	Island	0.225	-0.0033		0.00015	-0.00031	*
cg01356829	1	67772896	0.00084	<0.2	IL12RB2	Shore	0.196	0.031	*	0.00012	-0.00042	*
cg24058025	1	44412156	0.00084	<0.2	IPO13	Island	0.181	0.0025		-0.00013	0.00027	*
cg00666422	7	127881440	0.00084	<0.2	LEP	Shore	0.394	0.084	*	0.00022	-0.00063	*
cg13032057	6	30922803	0.00084	<0.2		Shore	0.771	0.0059		7.6e-05	-0.00032	*
cg12873610	17	27044322	0.00084	<0.2	RAB34	Island	0.44	0.027	*	1.1e-05	-0.00031	*
cg23548670	10	90341959	0.00084	<0.2	RNLS	Shore	0.74	-0.00085		0.00015	-0.00035	*
cg15475502	3	122662340	0.00084	<0.2	SEMA5B		0.624	-0.04	*	-1.4e-05	-1.6e-05
cg17053538	5	121766285	0.00084	<0.2	SNCAIP		0.855	0.017	*	7e-05	-0.00031	*
cg02068832	12	1976671	0.00085	<0.2	CACNA2D4	Shore	0.872	-0.0049		4.8e-05	-0.00017	*
cg26752657	1	75199075	0.00085	<0.2	CRYZ		0.042	0.0034		-4.1e-05	0.00013	*
cg06923861	11	117355376	0.00085	<0.2	DSCAML1	Shelf	0.911	-0.016	*	-0.00019	0.00024	*
cg18940439	14	63784574	0.00085	<0.2	GPHB5		0.817	0.02	*	4.6e-05	-9.2e-05
cg09018824	4	41361919	0.00085	<0.2	LIMCH1	Shore	0.798	0.015	*	-0.00011	0.00011
cg07376916	20	15986081	0.00085	<0.2	MACROD2		0.25	-0.029	*	-4.8e-05	0.00038	*
cg20422722	8	144803601	0.00085	<0.2	MAPK15	Shelf	0.862	-0.02	*	-0.00019	0.00041	*
cg00085790	1	211722100	0.00085	<0.2			0.742	0.023	*	-1.5e-05	-3.2e-05
cg01756899	16	1070137	0.00085	<0.2		Island	0.972	-0.0074	*	1e-05	-3.3e-05
cg08884611	16	34256776	0.00085	<0.2		Island	0.507	0.051	*	-0.00016	5.1e-05
cg15344192	2	121347210	0.00085	<0.2		Shore	0.653	-0.012		0.00011	-0.00053	*
cg21391046	4	183935233	0.00085	<0.2			0.711	0.043	*	0.00031	-0.00051	*
cg05226607	5	147548617	0.00085	<0.2	SPINK5L2		0.638	0.02	*	4.5e-05	-0.00044	*
cg02640638	7	123673690	0.00085	<0.2	TMEM229A	Island	0.358	-0.039	*	-4.7e-05	0.00011
cg04539172	6	32036611	0.00085	<0.2	TNXB		0.815	-0.0067		0.00015	-0.00032	*
cg17156534	20	39658922	0.00085	<0.2	TOP1	Shore	0.598	-0.031	*	0.00011	-0.00014
cg14839440	15	43213257	0.00085	<0.2	TTBK2	Island	0.146	0.011	*	4.2e-05	4.8e-05
cg04410355	19	41220016	0.00086	<0.2	ADCK4	Shore	0.838	-0.0042		0.00017	-0.00035	*
cg12277495	16	66462184	0.00086	<0.2	BEAN	Island	0.093	0.02	*	-7.3e-05	3.1e-05
cg08785577	12	49730687	0.00086	<0.2	C1QL4	Island	0.213	-0.028	*	9.5e-05	-7.7e-05
cg19914554	17	80275401	0.00086	<0.2	CD7	Shore	0.684	-0.011		0.00016	-0.00035	*
cg13667676	12	58239952	0.00086	<0.2	CTDSP2	Island	0.047	0.012	*	-4.1e-05	6.6e-05
cg01596854	9	140310081	0.00086	<0.2	EXD3	Shore	0.838	0.013	*	6.4e-05	-0.00029	*
cg14542590	14	89878675	0.00086	<0.2	FOXN3	Shelf	0.859	0.0037		-0.00015	0.00027	*
cg03852144	5	95159639	0.00086	<0.2	GLRX		0.117	0.034	*	0.00014	-0.00046	*
cg13072940	3	49967521	0.00086	<0.2	MON1A	Shore	0.36	0.00091		7.1e-05	-0.0004	*
cg27015161	2	24816070	0.00086	<0.2	NCOA1		0.948	-0.012	*	-2.2e-05	4.6e-05
cg10551329	6	32120933	0.00086	<0.2	PPT2	Shore	0.813	-0.029	*	-0.00012	8.6e-06
cg00960395	17	46799948	0.00086	<0.2	PRAC	Shore	0.285	-0.046	*	-0.00024	0.00065	*
cg04936619	17	30658537	0.00087	<0.2	C17orf75		0.173	0.035	*	0.00016	-0.00031	*
cg19869037	6	116732515	0.00087	<0.2	DSE		0.38	0.037	*	-5.6e-05	-5.6e-06
cg08250825	6	7540834	0.00087	<0.2	DSP	Shore	0.456	0.031		0.00065	-0.00083	*
cg21777095	6	27106564	0.00087	<0.2	HIST1H2BK	Shore	0.746	0.02	*	0.00016	-0.00044	*
cg10180440	10	102325486	0.00087	<0.2		Shelf	0.826	-0.024	*	7.6e-06	-0.00018
cg11029346	5	37371192	0.00087	<0.2	NUP155	Island	0.069	-0.0061		6.6e-05	-7.7e-05
cg01198491	12	24642841	0.00087	<0.2	SOX5		0.819	-0.026	*	-2.3e-05	8.1e-05
cg03222244	10	30026066	0.00087	<0.2	SVIL	Island	0.187	-0.024	*	-3.4e-05	0.00021	*
cg07035242	1	11336263	0.00087	<0.2	UBIAD1	Shelf	0.706	-0.015		0.00016	-0.00021
cg01881939	17	79480981	0.00088	<0.2	ACTG1	Island	0.107	-0.023	*	-0.00016	0.00031	*
cg02096656	7	139025181	0.00088	<0.2	C7orf55	Island	0.328	-0.013		0.00016	-0.00014
cg12273284	10	12490844	0.00088	<0.2	CAMK1D		0.091	0.017	*	0.00018	-0.00044	*
cg15930703	2	225775142	0.00088	<0.2	DOCK10		0.688	-0.089	*	-0.00036	0.0004
cg06063714	1	1951514	0.00088	<0.2	GABRD	Shore	0.842	-0.038	*	-4.7e-05	0.00019
cg15985184	19	51830311	0.00088	<0.2	IGLON5	Island	0.156	0.035	*	4.5e-05	-0.00042	*
cg18136930	7	4831038	0.00088	<0.2	KIAA0415	Shore	0.739	0.00051		-0.00028	0.00044	*
cg12944572	13	21570076	0.00088	<0.2	LATS2	Shelf	0.79	0.021	*	4.1e-05	-8.4e-05
cg15159104	15	43809865	0.00088	<0.2	MAP1A		0.338	0.012		-0.00011	0.00025	*
cg06849719	1	205399945	0.00088	<0.2			0.049	-0.0088	*	-3.6e-06	1.2e-05
cg07759377	8	67025920	0.00088	<0.2		Island	0.097	-0.0047		-0.00011	0.00024	*
cg24594177	6	28984685	0.00088	<0.2		Island	0.254	-0.032	*	-0.00021	-2e-05
cg25172604	17	41446521	0.00088	<0.2		Island	0.17	-0.089	*	-0.00021	0.00045	*
cg20334115	1	226107899	0.00088	<0.2	PYCR2	Shelf	0.37	0.019	*	2.4e-06	0.00017
cg02244288	16	89573955	0.00088	<0.2	SPG7	Island	0.319	-0.055	*	-0.0002	0.00039	*
cg07720174	2	202508813	0.00089	<0.2	ALS2CR4	Shore	0.831	0.02	*	5.4e-05	-0.00018	*
cg02462081	2	220405635	0.00089	<0.2	CHPF	Shore	0.697	0.026	*	0.00015	-0.00055	*
cg17000199	6	96464908	0.00089	<0.2	FUT9	Shore	0.688	-0.061	*	0.00016	-0.00015
cg14388488	20	61051777	0.00089	<0.2	GATA5	Island	0.442	-0.02		0.00032	-0.00048	*
cg03679456	3	169377946	0.00089	<0.2	MECOM	Shore	0.117	0.023	*	4e-05	-0.00033	*
cg21202551	14	105108721	0.00089	<0.2		Shelf	0.547	0.07	*	0.00023	-0.00099	*
cg06771958	6	84234463	0.00089	<0.2	PRSS35		0.782	0.026	*	-7.4e-06	-0.0002	*
cg09443153	10	100156205	0.00089	<0.2	PYROXD2		0.701	0.015	*	0.00012	-0.00034	*
cg27278001	14	101451739	0.00089	<0.2	SNORD114-25		0.829	0.039	*	0.00017	-0.0002
cg16929107	2	85554513	0.00089	<0.2	TGOLN2	Island	0.144	0.023	*	0.00019	-0.00038	*
cg03162045	3	142443933	0.00089	<0.2	TRPC1	Island	0.465	0.046	*	0.0001	-0.00048	*
cg02481294	4	15704550	0.0009	<0.2	BST1	Shore	0.36	-0.011	*	-0.00012	0.00028	*
cg15831296	14	101192591	0.0009	<0.2	DLK1	Shore	0.856	0.0078		-0.00011	0.00022	*
cg00765655	1	6304199	0.0009	<0.2	HES3	Shore	0.122	0.032	*	0.00014	-0.00024	*
cg27321175	10	15689009	0.0009	<0.2	ITGA8		0.778	-0.00031		0.00019	-0.00044	*
cg02580606	17	39526726	0.0009	<0.2	KRT33B		0.802	-0.005		7.4e-05	-0.0002	*
cg10582048	10	95204506	0.0009	<0.2	MYOF		0.875	-0.0071		7.7e-05	-0.00013	*
cg07315993	1	150186050	0.0009	<0.2		Island	0.219	-0.052	*	-0.00014	0.00018
cg08564636	6	166324392	0.0009	<0.2			0.864	-0.025	*	2e-06	1.6e-05
cg08887153	2	191492666	0.0009	<0.2			0.193	-0.041	*	-0.0001	0.00039	*
cg17502594	1	62107542	0.0009	<0.2			0.326	-0.024	*	-0.00035	0.00065	*
cg24523978	13	112064147	0.0009	<0.2		Shore	0.528	0.053	*	0.00024	-0.00054	*
cg07727594	20	45187423	0.0009	<0.2	SLC13A3		0.488	0.021	*	-4e-05	0.00019
cg12435551	1	118679290	0.0009	<0.2	SPAG17		0.157	0.031	*	5e-05	-0.00029	*
cg01450842	2	48796213	0.0009	<0.2	STON1-GTF2A1L		0.852	0.03	*	-6.6e-05	-0.00018
cg14400871	16	75018461	0.0009	<0.2	WDR59	Island	0.155	-0.016	*	-0.00012	0.00036	*
cg13183780	1	23809682	0.00091	<0.2	ASAP3	Shore	0.518	-0.038	*	6.3e-05	0.00029	*
cg01045337	16	374988	0.00091	<0.2	AXIN1	Island	0.115	0.03	*	0.00029	-0.00048	*
cg18792803	13	110919641	0.00091	<0.2	COL4A1	Shore	0.26	0.058	*	0.00043	-0.00047	*
cg08101375	12	104443925	0.00091	<0.2	GLT8D2		0.215	-0.055	*	-8.5e-05	0.00029
cg22321327	11	47639458	0.00091	<0.2	MTCH2		0.49	0.032	*	6.5e-05	0.00014
cg00721635	1	153572208	0.00091	<0.2			0.884	-0.025	*	-0.00017	0.0003	*
cg13088406	12	69725117	0.00091	<0.2			0.113	-0.014	*	-6.4e-05	0.00023	*
cg13426632	8	94858277	0.00091	<0.2			0.867	-0.021	*	-0.00016	0.00026	*
cg15728146	10	26678169	0.00091	<0.2		Shelf	0.906	0.00069		0.00018	-0.00024	*
cg09064070	2	7057245	0.00091	<0.2	RNF144A	Shore	0.595	-0.00059		0.00036	-0.00065	*
cg24612667	11	124735554	0.00091	<0.2	ROBO3	Island	0.235	-0.044	*	-0.00016	0.00035	*
cg18321051	19	12251893	0.00091	<0.2	ZNF20	Shore	0.438	-0.052		-7.1e-05	0.0011	*
cg00558031	4	8466291	0.00092	<0.2	C4orf23		0.934	0.001		-5.5e-05	0.00013	*
cg13649658	9	140680393	0.00092	<0.2	EHMT1	Shelf	0.746	-0.02	*	-0.00011	0.00025	*
cg25078137	17	46698598	0.00092	<0.2	HOXB9	Shore	0.735	0.0032		5.2e-05	-0.0004	*
cg08595501	5	75878300	0.00092	<0.2	IQGAP2		0.575	0.05	*	-4.5e-05	9.9e-05
cg08718098	12	116756405	0.00092	<0.2			0.888	-0.0065		7.5e-05	-0.00023	*
cg04041447	13	52702431	0.00092	<0.2	NEK5	Shore	0.176	-0.034	*	3.5e-05	8.9e-05
cg14186824	11	56259268	0.00092	<0.2	OR8U8		0.818	-0.0076		-0.00012	0.00028	*
cg26197699	18	43913755	0.00092	<0.2	RNF165	Island	0.04	0.015	*	5.1e-05	-0.00015	*
cg22088127	6	32948406	0.00093	<0.2	BRD2		0.937	-0.015	*	3.1e-05	1.3e-05
cg17283857	10	102989315	0.00093	<0.2	FLJ41350	Island	0.428	-0.096	*	-0.00029	0.00046
cg00677866	20	61051685	0.00093	<0.2	GATA5	Island	0.33	-0.037	*	5.6e-05	-5.3e-05
cg10755235	14	60974039	0.00093	<0.2		Island	0.31	0.064	*	9.3e-05	-0.00067	*
cg22517020	1	193082085	0.00093	<0.2			0.826	0.0085		-9.5e-05	0.0001
cg23560676	8	126272469	0.00093	<0.2	NSMCE2		0.847	0.021	*	0.00016	-0.00025	*
cg12589839	18	39575942	0.00093	<0.2	PIK3C3		0.624	0.035	*	0.00023	-0.00025	*
cg06469895	16	69418206	0.00093	<0.2	TERF2	Shore	0.711	0.016		0.00016	-0.0006	*
cg01802898	1	16069621	0.00093	<0.2	TMEM82	Shore	0.918	-0.018	*	-8.7e-05	0.00029	*
cg25203085	7	887678	0.00093	<0.2	UNC84A	Shore	0.761	0.0054		6.1e-05	-0.00018	*
cg02013148	3	149238478	0.00093	<0.2	WWTR1		0.821	-0.004		8.7e-05	-0.00029	*
cg12134900	4	81256719	0.00094	<0.2	C4orf22	Shore	0.27	-0.049	*	-0.00016	0.00061	*
cg15589689	1	44170389	0.00094	<0.2	KDM4A	Shelf	0.899	0.0035		7.7e-05	-0.00023	*
cg03261272	11	122073862	0.00094	<0.2	LOC399959		0.187	-0.026	*	-0.00032	0.00055	*
cg06092702	1	163392909	0.00094	<0.2		Island	0.857	0.014	*	4.7e-05	-0.00018	*
cg21313498	6	164091806	0.00094	<0.2		Shore	0.866	0.03	*	5e-05	-0.00027	*
cg06908919	14	35587750	0.00094	<0.2	PPP2R3C	Shelf	0.821	0.023	*	-3.2e-05	-3.9e-05
cg07291836	20	45319455	0.00094	<0.2	TP53RK	Shore	0.436	0.053	*	-4.7e-05	-0.00026
cg03481035	6	170786302	0.00095	<0.2		Shore	0.722	0.047	*	0.00012	-0.00046	*
cg09539496	8	20164433	0.00095	<0.2		Shelf	0.842	-0.045	*	-8.2e-05	0.00042	*
cg17178468	17	43049442	0.00095	<0.2		Shore	0.33	-0.025		-0.00019	0.00044	*
cg26342141	6	98373013	0.00095	<0.2			0.68	0.04	*	0.00013	-0.0003	*
cg09085216	1	204329081	0.00095	<0.2	PLEKHA6		0.131	-0.0052		-0.00012	0.00031	*
cg02576092	1	27668556	0.00095	<0.2	SYTL1		0.129	-0.0076		-5.3e-05	0.00023	*
cg04879378	8	10929210	0.00095	<0.2	XKR6	Island	0.817	0.027	*	0.00014	-0.00019
cg07493499	17	911887	0.00096	<0.2	ABR	Shore	0.868	0.012	*	4.9e-05	-0.00013	*
cg23638070	8	6569043	0.00096	<0.2	AGPAT5	Shelf	0.922	5.1e-06		0.00012	-0.00021	*
cg25105652	5	39413038	0.00096	<0.2	DAB2		0.482	0.047	*	3.5e-05	-0.00011
cg14441480	6	32729500	0.00096	<0.2	HLA-DQB2	Island	0.697	-0.069	*	-0.00054	0.001	*
cg05075308	4	185329364	0.00096	<0.2	IRF2		0.756	0.0059		-0.0001	0.00032	*
cg02379107	20	36889378	0.00096	<0.2	KIAA1755	Island	0.819	-0.034	*	3.4e-05	-0.00024
cg22494078	1	156649909	0.00096	<0.2		Shelf	0.81	-0.04	*	-6.3e-05	0.00025
cg25985959	6	106430134	0.00096	<0.2		Shore	0.774	0.023	*	-0.00019	0.00019
cg03099208	7	8474544	0.00096	<0.2	NXPH1	Island	0.337	-0.031	*	-0.00043	0.00072	*
cg16602460	6	32156071	0.00096	<0.2	PBX2		0.79	-0.011		-9.4e-05	0.00039	*
cg13319139	16	70472477	0.00096	<0.2	ST3GAL2	Shore	0.163	-0.014	*	-2.6e-05	0.00036	*
cg22161147	4	7777798	0.00097	<0.2	AFAP1	Shelf	0.836	0.0049		-0.00017	0.00022	*
cg20828837	20	5731032	0.00097	<0.2	C20orf196		0.168	-0.034	*	0.00014	-6.4e-05
cg06048436	13	43938637	0.00097	<0.2	ENOX1		0.348	0.021	*	-1.2e-05	2.2e-05
cg13263114	17	37857070	0.00097	<0.2	ERBB2	Shore	0.16	0.036	*	0.00029	-0.0005	*
cg14399183	9	124048308	0.00097	<0.2	GSN		0.315	-0.028	*	-0.00027	0.00067	*
cg12067423	15	85141633	0.00097	<0.2		Shelf	0.151	0.016		-1.6e-05	0.00022
cg14722509	5	170815938	0.00097	<0.2	NPM1	Shore	0.207	-0.028	*	5e-05	-4.7e-05
cg02170478	4	55100995	0.00097	<0.2	PDGFRA	Shore	0.437	0.041	*	0.00026	-0.00045	*
cg01080927	6	125341187	0.00097	<0.2	RNF217		0.921	-0.017	*	-1.6e-05	0.00017	*
cg19154600	10	75415868	0.00097	<0.2	SYNPO2L		0.586	3.6e-05		-6.9e-05	0.00045	*
cg14520941	14	77935699	0.00098	<0.2	AHSA1		0.803	0.024	*	0.00018	-0.00038	*
cg13882090	6	33246094	0.00098	<0.2	B3GALT4	Shore	0.512	-0.007		0.00011	-0.00026	*
cg07150045	2	163696187	0.00098	<0.2	KCNH7		0.269	0.033	*	0.0001	5.3e-05
cg16924045	2	191343262	0.00098	<0.2	MFSD6		0.908	-0.017	*	-7.4e-05	0.00017	*
cg02167713	17	79630115	0.00098	<0.2		Shelf	0.802	0.006		0.00059	-0.0009	*
cg11292869	7	17552196	0.00098	<0.2			0.935	-0.018	*	-7.7e-05	0.00012
cg16845548	2	39834993	0.00098	<0.2			0.757	0.013		7.6e-05	-0.00038	*
cg20513206	19	40855502	0.00098	<0.2	PLD3	Shore	0.765	-0.034	*	-0.00011	0.00034	*
cg13531462	9	135137269	0.00098	<0.2	SETX		0.789	0.031	*	-4.6e-05	4.2e-07
cg03037030	6	31543300	0.00098	<0.2	TNF		0.138	-0.0014		0.0005	-0.00058	*
cg11462315	2	43455048	0.00098	<0.2	ZFP36L2	Shore	0.139	-0.022	*	-1.3e-05	7.5e-05
cg04402803	12	56109624	0.00099	<0.2	BLOC1S1	Shore	0.225	-0.038	*	-0.0001	0.00038	*
cg02548238	5	121413050	0.00099	<0.2	LOX	Island	0.119	-0.014		1.8e-05	-0.00014
cg02334314	3	123752504	0.00099	<0.2		Island	0.14	-0.02	*	0.00021	-0.00013
cg23527067	12	11082462	0.00099	<0.2	PRH2		0.806	0.023	*	6e-05	-0.00011
cg23412793	4	20253922	0.00099	<0.2	SLIT2	Island	0.178	-0.032	*	-3.6e-06	-6.3e-05
cg27119612	15	57491001	0.00099	<0.2	TCF12		0.651	0.029	*	-0.00022	0.00016
cg03325693	11	34196316	0.001	<0.2	ABTB2	Shore	0.645	-0.026	*	2.3e-05	4.9e-05
cg10413169	8	124700752	0.001	<0.2	ANXA13		0.863	0.0083		0.00011	-0.00031	*
cg05908979	3	52443702	0.001	<0.2	BAP1	Island	0.123	0.017		0.00023	-0.00046	*
cg06818532	3	107318032	0.001	<0.2	BBX		0.085	-0.019	*	-8.5e-05	0.00021	*
cg04138346	6	32938946	0.001	<0.2	BRD2	Shore	0.175	-0.036	*	-7.4e-05	0.00049	*
cg26285698	16	29757334	0.001	<0.2	C16orf54		0.094	0.022	*	2.8e-05	-0.00012
cg16837206	11	104972474	0.001	<0.2	CASP1		0.656	0.0087		-0.00022	0.00046	*
cg25608069	14	54976570	0.001	<0.2	CGRRF1	Island	0.043	-0.0023		-3.6e-05	0.00014	*
cg23925994	12	94145366	0.001	<0.2	CRADD		0.9	0.019	*	7.5e-05	-0.00017	*
cg00757327	12	49390906	0.001	<0.2	DDN	Island	0.311	-0.021	*	-0.00018	0.00055	*
cg03513893	3	184052502	0.001	<0.2	EIF4G1	Shore	0.841	0.0013		6.7e-06	-0.00024	*
cg05488632	19	15343174	0.001	<0.2	EPHX3	Island	0.351	-0.022	*	-0.00017	0.00033	*
cg02726121	8	11561531	0.001	<0.2	GATA4	Island	0.224	-0.028	*	-0.00017	0.00051	*
cg00440797	6	32493873	0.001	<0.2	HLA-DRB5	Shelf	0.465	-0.094	*	0.00036	-0.00032
cg16937769	12	54409485	0.001	<0.2	HOXC4	Shore	0.097	0.012		-7.4e-05	0.0002
cg16111231	6	160399700	0.001	<0.2	IGF2R		0.73	-0.039	*	-0.0001	0.00021
cg03732295	8	57906837	0.001	<0.2	IMPAD1	Shore	0.172	0.0041		-0.00017	0.00032	*
cg25741118	1	54482237	0.001	<0.2	LDLRAD1		0.801	-0.015		0.00019	-0.00038	*
cg01652927	15	74229811	0.001	<0.2	LOXL1		0.868	-0.012	*	8.7e-05	-7e-05
cg12289926	11	68153810	0.001	<0.2	LRP5	Island	0.775	0.02	*	-0.00017	0.00016
cg00084435	5	195276	0.001	<0.2	LRRC14B	Island	0.81	-0.018		-0.00017	0.00051	*
cg02637320	1	205561338	0.001	<0.2	MFSD4	Island	0.084	-0.02	*	3.9e-05	-7.3e-06
cg16595246	2	48009933	0.001	<0.2	MSH6	Island	0.549	-0.023	*	0.00019	-0.00028
cg19590445	5	174155345	0.001	<0.2	MSX2	Shelf	0.495	0.089	*	0.00016	-0.00086	*
cg00634652	13	112166963	0.001	<0.2			0.834	0.019	*	1.1e-05	0.00011
cg00714810	10	46975531	0.001	<0.2		Shelf	0.727	-0.019	*	-0.00011	0.00027	*
cg02448276	1	11845238	0.001	<0.2			0.16	-0.043	*	-0.00021	0.00041	*
cg03921416	12	59990675	0.001	<0.2		Shore	0.171	-0.029	*	-6.1e-05	0.00019
cg04163475	6	30069065	0.001	<0.2		Shore	0.276	-0.054	*	-0.00031	0.00053	*
cg04336279	8	130365731	0.001	<0.2			0.783	0.025	*	0.00021	-0.00055	*
cg04494791	16	70196247	0.001	<0.2			0.686	-0.026	*	-0.00012	0.00055	*
cg04689582	10	7526744	0.001	<0.2			0.128	0.024	*	1.3e-05	-0.0002	*
cg06641415	2	73384073	0.001	<0.2			0.211	-0.052	*	-0.00037	0.00073	*
cg06779672	6	1378238	0.001	<0.2		Shore	0.202	-0.033	*	-0.00028	0.00062	*
cg07226162	10	112293247	0.001	<0.2		Shelf	0.047	0.014		7.6e-05	-0.00021	*
cg07535366	5	179806657	0.001	<0.2			0.835	-0.021	*	-0.00013	0.0004	*
cg07962303	19	11253944	0.001	<0.2			0.235	-0.026		-0.00034	0.00055	*
cg08826840	3	104536324	0.001	<0.2			0.775	-0.006		-0.00026	0.00064	*
cg09470012	1	44509516	0.001	<0.2			0.801	0.0028		5.7e-05	-0.00027	*
cg10035555	17	4979072	0.001	<0.2		Shelf	0.802	0.024	*	9.8e-05	-0.0002	*
cg10686304	8	22561205	0.001	<0.2		Island	0.192	0.034	*	0.00026	-0.00052	*
cg12101340	13	53972317	0.001	<0.2			0.875	-0.019		-0.00028	0.0004	*
cg13407464	15	93351779	0.001	<0.2		Shore	0.085	0.021	*	-6.5e-05	-3e-05
cg14501119	14	105779532	0.001	<0.2		Shore	0.862	-0.0094		-0.00018	0.00034	*
cg14907066	8	1048112	0.001	<0.2		Shore	0.911	-0.02	*	-1.6e-05	0.00012
cg17841765	1	22560699	0.001	<0.2			0.739	-0.02		-0.00032	0.0006	*
cg19734013	17	72104893	0.001	<0.2			0.71	-0.066	*	-9.9e-05	0.00069	*
cg24340935	19	3877286	0.001	<0.2		Shelf	0.189	0.074	*	0.00033	-0.00057	*
cg24618169	2	239695645	0.001	<0.2			0.741	-0.0019		-0.00036	0.00066	*
cg27048388	13	22493776	0.001	<0.2			0.92	0.017	*	2.3e-05	-9.2e-05
cg13727808	4	103499194	0.001	<0.2	NFKB1		0.85	0.0073		1.9e-05	-0.00025	*
cg01782227	14	36988778	0.001	<0.2	NKX2-1	Island	0.125	0.016	*	-0.00011	0.00012
cg13848990	11	55682457	0.001	<0.2	OR5W2		0.731	0.018	*	0.00018	-0.00045	*
cg21912093	14	73704842	0.001	<0.2	PAPLN	Island	0.337	0.007		-5e-05	0.00019	*
cg07266144	5	131607372	0.001	<0.2	PDLIM4	Island	0.529	0.077	*	0.0002	-0.00055	*
cg05381383	12	80309007	0.001	<0.2	PPP1R12A		0.636	0.014		0.00021	-0.00037	*
cg09697403	6	72595944	0.001	<0.2	RIMS1	Shore	0.408	0.062	*	0.0002	-0.00037	*
cg03427849	4	184578976	0.001	<0.2	RWDD4A	Shore	0.447	0.0065		-0.0002	0.00045	*
cg06095560	19	47633912	0.001	<0.2	SAE1	Island	0.102	-0.014	*	-6.1e-05	0.00021	*
cg26312133	17	71428204	0.001	<0.2	SDK2	Shelf	0.846	-0.023	*	-7.8e-06	0.00013
cg10362613	8	19177170	0.001	<0.2	SH2D4A		0.831	-0.024	*	-0.00018	0.00024	*
cg19637048	14	101419710	0.001	<0.2	SNORD114-4		0.808	0.031	*	0.00024	-0.00047	*
cg25588844	2	10037561	0.001	<0.2	TAF1B		0.44	0.061	*	-2.9e-05	-9.2e-05
cg07600374	6	134278787	0.001	<0.2	TBPL1	Shelf	0.82	0.015	*	-4.4e-05	5.5e-06
cg08942939	1	119532542	0.001	<0.2	TBX15	Shore	0.191	-0.011		-0.00011	0.00054	*
cg03935379	5	1282703	0.001	<0.2	TERT	Island	0.778	-0.0069		-0.0002	0.00046	*
cg09915983	20	2844691	0.001	<0.2	VPS16		0.939	-0.015	*	-9.1e-05	0.00016	*
cg07349054	1	3558237	0.001	<0.2	WDR8	Shore	0.882	0.02	*	-1.1e-05	-0.00021	*
cg11437226	19	12513273	0.001	<0.2	ZNF799	Shore	0.681	0.011		-9.2e-05	0.00019	*
cg08466740	16	6534829	0.0011	<0.2	A2BP1	Shore	0.505	0.076	*	0.0001	-0.00014
cg23568341	17	1011974	0.0011	<0.2	ABR	Island	0.127	0.011	*	-7.3e-05	7.8e-05
cg22676877	10	1597804	0.0011	<0.2	ADARB2	Shelf	0.87	0.017	*	7.7e-05	-0.00024	*
cg07371628	10	49811797	0.0011	<0.2	ARHGAP22	Shore	0.767	-0.026	*	6.7e-05	0.00011
cg12081303	1	161039681	0.0011	<0.2	ARHGAP30		0.176	0.023	*	0.00013	-0.00027	*
cg26530201	5	149682638	0.0011	<0.2	ARSI	Shore	0.214	-0.043	*	-9.4e-05	0.00046	*
cg05970317	7	70111180	0.0011	<0.2	AUTS2		0.827	-0.03	*	-8.7e-06	0.00024	*
cg26718640	12	107714750	0.0011	<0.2	BTBD11	Shore	0.122	-0.0098		-0.00012	0.00041	*
cg05881566	11	61522765	0.0011	<0.2	C11orf9	Shelf	0.861	0.0085		-0.00012	0.00014
cg12967137	14	29247605	0.0011	<0.2	C14orf23	Island	0.367	-0.045	*	-6.3e-05	2.9e-05
cg05058234	2	241526962	0.0011	<0.2	CAPN10	Shore	0.171	0.0062		-0.00018	0.00031	*
cg16988129	6	41909703	0.0011	<0.2	CCND3	Island	0.146	0.00079		-6.7e-05	0.00018	*
cg10852661	5	162864385	0.0011	<0.2	CCNG1	Island	0.076	-0.011	*	-6.3e-05	0.00027	*
cg04098585	2	204571215	0.0011	<0.2	CD28		0.117	0.031	*	9.6e-05	-0.00032	*
cg10418044	7	136553170	0.0011	<0.2	CHRM2	Shore	0.317	-0.07	*	-0.00054	0.00069	*
cg20645058	12	10163532	0.0011	<0.2	CLEC12B		0.822	-0.021	*	-0.00018	0.00025	*
cg11251293	1	205025861	0.0011	<0.2	CNTN2		0.877	0.00063		9e-05	-0.00026	*
cg04319882	16	19535207	0.0011	<0.2	CP110	Island	0.222	0.016	*	-0.00013	7.4e-05
cg21285895	1	40974653	0.0011	<0.2	DEM1	Island	0.192	-0.015		-0.00024	0.0005	*
cg23563008	7	96635624	0.0011	<0.2	DLX6AS	Island	0.173	-0.032	*	-4.9e-05	0.00014
cg09601923	17	72270201	0.0011	<0.2	DNAI2	Shore	0.61	-0.026		0.00018	-0.0004	*
cg21717369	6	8103092	0.0011	<0.2	EEF1E1	Shore	0.461	0.0031		-0.00031	0.00073	*
cg13844899	7	105221998	0.0011	<0.2	EFCAB10	Shore	0.28	-0.05	*	-0.00017	0.00012
cg25661397	17	37521150	0.0011	<0.2	FBXL20		0.571	0.033	*	2.7e-05	2.2e-05
cg01160394	14	69951720	0.0011	<0.2	FLJ44817	Island	0.18	0.0016		0.00013	-0.00038	*
cg18255240	15	27111993	0.0011	<0.2	GABRA5	Shore	0.39	-0.032	*	-6.3e-05	8e-05
cg09144707	2	171678251	0.0011	<0.2	GAD1	Shore	0.284	0.048	*	7.3e-05	-0.00014
cg25903261	20	62219204	0.0011	<0.2	GMEB2	Shelf	0.805	0.0045		0.00016	-0.00038	*
cg04450876	12	54866945	0.0011	<0.2	GTSF1		0.896	-0.012	*	2.3e-05	-2.8e-05
cg05274179	16	229528	0.0011	<0.2	HBQ1	Shore	0.946	0.0052		-0.00012	0.00012	*
cg09495769	7	27225342	0.0011	<0.2	HOXA11AS	Island	0.073	0.025	*	4e-05	-0.00013
cg03642463	17	77178665	0.0011	<0.2	HRNBP3	Shore	0.274	-0.023		-0.00012	0.0007	*
cg01962146	4	995931	0.0011	<0.2	IDUA	Island	0.391	-0.05	*	4e-05	5.8e-05
cg04468334	7	149414901	0.0011	<0.2	KRBA1	Shore	0.771	-0.0048		-4.9e-05	0.00023	*
cg06153634	12	52627576	0.0011	<0.2	KRT7	Island	0.182	0.03	*	0.00014	-0.00013
cg27198696	6	31680112	0.0011	<0.2	LY6G6E		0.505	-0.025		-0.00027	0.00078	*
cg21703222	7	77649542	0.0011	<0.2	MAGI2	Island	0.13	-0.019	*	4.3e-05	1.9e-05
cg09736950	15	62938334	0.0011	<0.2	MGC15885		0.932	-0.016	*	-2.9e-05	0.00028	*
cg09213165	14	101526140	0.0011	<0.2	MIR154		0.835	0.025	*	0.00023	-0.00048	*
cg20988440	13	50624615	0.0011	<0.2	MIR16-1		0.775	0.031	*	0.00015	-0.00055	*
cg01397141	15	79502137	0.0011	<0.2	MIR184		0.2	-0.028	*	0.00016	-0.00023
cg03905819	12	54385275	0.0011	<0.2	MIR196A2	Shelf	0.439	-0.062	*	-0.00057	0.001	*
cg18096939	14	101513572	0.0011	<0.2	MIR889		0.706	0.022	*	0.00016	-0.00038	*
cg11546106	1	32706831	0.0011	<0.2	MTMR9L	Island	0.198	-0.034	*	-2.2e-05	0.00012
cg00242035	11	47416358	0.0011	<0.2		Island	0.101	0.021	*	5.9e-05	-0.00015	*
cg00794174	12	131196417	0.0011	<0.2		Shelf	0.895	-0.036	*	-7.3e-05	0.00034	*
cg00925778	10	105113085	0.0011	<0.2		Shelf	0.878	-0.006		4.3e-05	-0.00019	*
cg01372434	6	5997375	0.0011	<0.2		Island	0.094	-0.0089	*	6.5e-06	-5.1e-05
cg01765406	2	129231478	0.0011	<0.2		Shelf	0.36	0.022	*	4e-05	0.00021
cg01996343	3	141455371	0.0011	<0.2		Shore	0.803	-0.03	*	2.5e-05	0.00018
cg02710168	6	104461576	0.0011	<0.2			0.574	-0.043	*	-0.0002	0.00071	*
cg05089464	6	793452	0.0011	<0.2			0.743	0.013		-0.00021	0.00042	*
cg05232708	16	89127668	0.0011	<0.2		Island	0.765	-0.017		-0.0003	0.0005	*
cg05281418	7	20836900	0.0011	<0.2		Shore	0.259	-0.005		0.00021	-0.00028	*
cg05798720	18	24235718	0.0011	<0.2		Island	0.189	-0.036	*	-0.00012	0.00025
cg06800222	17	10195469	0.0011	<0.2			0.888	0.013		0.00017	-0.00031	*
cg06846669	5	134879739	0.0011	<0.2		Island	0.081	0.026	*	2.6e-05	-0.00026	*
cg07077525	6	130088518	0.0011	<0.2			0.2	-0.049	*	-5.4e-05	0.00029
cg08079908	2	176997277	0.0011	<0.2		Shore	0.349	-0.001		-0.00032	0.00062	*
cg09430882	8	102502541	0.0011	<0.2		Shore	0.622	0.031	*	0.00013	-0.00011
cg10634568	2	30186753	0.0011	<0.2			0.776	-0.021		3.8e-05	-0.00025
cg11400759	10	134697832	0.0011	<0.2		Shore	0.828	0.016		-0.00028	0.00037	*
cg13058457	15	38422160	0.0011	<0.2			0.264	0.051	*	0.00024	-0.00041	*
cg13448197	10	43846281	0.0011	<0.2		Island	0.18	0.11	*	0.00021	-0.00077	*
cg15050015	5	141183906	0.0011	<0.2			0.687	0.018		-0.00029	0.0005	*
cg16402875	7	29229717	0.0011	<0.2		Shelf	0.763	-0.023	*	1.5e-05	-4.9e-05
cg16789680	10	131764852	0.0011	<0.2		Island	0.106	0.029	*	0.00014	-0.00018	*
cg16994517	4	2450925	0.0011	<0.2			0.875	0.014	*	-1.7e-05	2.4e-05
cg17928286	1	205414220	0.0011	<0.2			0.356	0.025	*	-2.1e-05	0.00011
cg18803384	11	120384039	0.0011	<0.2		Shore	0.711	0.021	*	-0.00012	-1.8e-05
cg22488081	4	125336414	0.0011	<0.2			0.834	0.021	*	6.8e-05	-0.00016	*
cg23632109	17	77896584	0.0011	<0.2			0.793	0.024	*	0.00025	-0.00051	*
cg24961583	3	27765409	0.0011	<0.2		Island	0.17	-0.042	*	-0.00014	0.00029
cg18221226	12	124997487	0.0011	<0.2	NCOR2		0.416	0.037	*	-8.7e-05	-0.00011
cg05753993	18	77199432	0.0011	<0.2	NFATC1	Shelf	0.455	-0.044	*	-0.00031	0.00033	*
cg03128029	2	203143288	0.0011	<0.2	NOP58		0.663	0.017		-0.00016	0.00032	*
cg24435401	11	66187533	0.0011	<0.2	NPAS4	Shore	0.154	-0.002		0.0004	-0.00042	*
cg11485595	5	32713464	0.0011	<0.2	NPR3	Island	0.148	-0.021	*	-0.00018	0.00029	*
cg10940462	11	64479015	0.0011	<0.2	NRXN2	Island	0.388	0.024		0.00014	-0.00074	*
cg04346530	4	100082970	0.0011	<0.2	PCNAP1		0.762	0.0027		-7.2e-05	0.00021	*
cg11153912	13	28494497	0.0011	<0.2	PDX1	Island	0.06	-0.019	*	-0.00011	0.00026	*
cg15655935	11	59815177	0.0011	<0.2	PLAC1L		0.929	-0.014	*	4.5e-05	-5.1e-05
cg05673882	5	74862702	0.0011	<0.2	POLK		0.286	0.045	*	-0.00016	0.00017
cg18744482	6	31920110	0.0011	<0.2	RDBP		0.82	0.0043		-8.3e-05	0.00023	*
cg26981651	6	32147670	0.0011	<0.2	RNF5		0.888	-0.0082	*	3.1e-05	-4.1e-05
cg17859448	1	101703749	0.0011	<0.2	S1PR1	Shore	0.322	0.065	*	5.3e-05	-0.00061	*
cg07490276	14	70233797	0.0011	<0.2	SFRS5	Island	0.188	0.015	*	-0.00013	8.3e-05
cg14479910	14	36975263	0.0011	<0.2	SFTA3	Island	0.328	-0.014		0.00024	-0.00035	*
cg26824947	5	1077682	0.0011	<0.2	SLC12A7	Shore	0.696	0.028	*	0.00025	-0.00065	*
cg12526474	7	140097579	0.0011	<0.2	SLC37A3	Shore	0.308	0.036	*	0.00014	-0.0006	*
cg17442852	17	1478889	0.0011	<0.2	SLC43A2	Island	0.614	0.053	*	-7.8e-05	-1.4e-05
cg04333863	2	70121129	0.0011	<0.2	SNRNP27		0.228	-0.032	*	-0.00019	0.00057	*
cg10428394	15	25101680	0.0011	<0.2	SNRPN		0.48	0.045	*	0.00016	-4.1e-05
cg02964356	12	49883750	0.0011	<0.2	SPATS2		0.85	-0.015		-2.1e-05	0.00046	*
cg01380821	17	74582181	0.0011	<0.2	ST6GALNAC2	Island	0.122	-0.0082		-1.2e-05	0.00027	*
cg01293346	12	11149362	0.0011	<0.2	TAS2R20		0.361	0.025	*	0.00037	-0.00063	*
cg23679615	6	31127159	0.0011	<0.2	TCF19	Shore	0.228	-0.03	*	0.00023	-0.00033
cg25739875	6	10419684	0.0011	<0.2	TFAP2A	Island	0.358	0.068	*	0.00029	-0.00056	*
cg05121790	1	12123554	0.0011	<0.2	TNFRSF8	Island	0.128	0.02	*	-6.5e-05	3.1e-06
cg20345556	6	30175305	0.0011	<0.2	TRIM26		0.796	0.027	*	0.00024	-0.00055	*
cg02932780	6	31762353	0.0011	<0.2	VARS	Shore	0.675	-0.026	*	0.00016	-0.00017
cg19996501	6	117585479	0.0011	<0.2	VGLL2	Shore	0.295	0.038	*	0.00021	-0.0005	*
cg21055978	7	38948895	0.0011	<0.2	VPS41		0.387	-0.0076		-0.00022	0.00049	*
cg21988233	19	58790252	0.0011	<0.2	ZNF8	Island	0.073	0.01	*	-3.2e-05	-4.8e-05
cg20275132	6	28367749	0.0011	<0.2	ZSCAN12	Shore	0.143	0.015	*	-9.8e-06	-0.00027	*
cg00322262	4	8085866	0.0012	<0.2	ABLIM2	Shore	0.853	-0.031	*	-0.00018	0.00038	*
cg10458080	12	112178900	0.0012	<0.2	ACAD10		0.823	0.016	*	-3.7e-05	3.3e-05
cg18275958	5	178736443	0.0012	<0.2	ADAMTS2		0.745	-0.032	*	-7.6e-05	0.00041	*
cg13888445	9	130628947	0.0012	<0.2	AK1		0.846	0.019	*	0.00021	-0.00038	*
cg14380774	14	101029898	0.0012	<0.2	BEGAIN	Shelf	0.75	-0.0074		-0.00023	0.00047	*
cg22839108	17	79507680	0.0012	<0.2	C17orf70	Shelf	0.849	-0.0092		-0.00031	0.00048	*
cg21683390	18	13259088	0.0012	<0.2	C18orf1	Shelf	0.486	0.023		-0.0001	0.00044	*
cg06524264	20	259925	0.0012	<0.2	C20orf96	Island	0.102	0.1	*	0.00025	-0.00045
cg27207776	16	71393801	0.0012	<0.2	CALB2	Shore	0.714	-0.024	*	-0.0004	0.00058	*
cg14156760	5	110559964	0.0012	<0.2	CAMK4	Island	0.433	-0.039	*	-0.0002	0.00064	*
cg05231930	16	57758366	0.0012	<0.2	CCDC135	Shore	0.881	0.0041		-0.0002	0.00028	*
cg21025488	13	115000149	0.0012	<0.2	CDC16	Island	0.668	-0.091	*	-0.00021	0.00017
cg14909213	12	8694468	0.0012	<0.2	CLEC4E		0.829	-0.02	*	7.4e-05	-7.1e-05
cg23010585	11	67210192	0.0012	<0.2	CORO1B		0.917	-0.015	*	-6.1e-05	7.2e-05
cg18911972	17	71259036	0.0012	<0.2	CPSF4L		0.739	-0.0036		0.00012	-0.00026	*
cg04850976	16	3782990	0.0012	<0.2	CREBBP	Shore	0.873	-0.0074		7.2e-05	-0.0002	*
cg04923928	7	30721797	0.0012	<0.2	CRHR2	Island	0.131	-0.017	*	-0.00011	0.00023	*
cg20083989	14	23039506	0.0012	<0.2	DAD1		0.134	-0.011		2e-05	-0.00018
cg02310286	8	88886432	0.0012	<0.2	DCAF4L2	Island	0.861	0.025	*	0.00027	-0.00039	*
cg08268254	14	69620440	0.0012	<0.2	DCAF5	Island	0.188	-0.037	*	-4.3e-05	0.00045	*
cg23201841	1	205602113	0.0012	<0.2	ELK4	Shore	0.732	0.0044		-0.00031	0.00043	*
cg04599041	6	131228375	0.0012	<0.2	EPB41L2		0.844	0.035	*	6.6e-05	-0.0004	*
cg24025508	6	564052	0.0012	<0.2	EXOC2		0.83	0.02	*	7e-05	-0.00012
cg06713675	4	122721982	0.0012	<0.2	EXOSC9	Shore	0.197	-0.0089		-0.0004	0.00098	*
cg15893493	8	124194847	0.0012	<0.2	FAM83A		0.189	-0.0087		-0.00023	0.00039	*
cg20366397	3	59759843	0.0012	<0.2	FHIT		0.88	-0.022	*	-5.7e-05	0.00022	*
cg01649773	11	27015991	0.0012	<0.2	FIBIN		0.265	0.044	*	9.3e-05	-5.7e-05
cg25310784	5	60985163	0.0012	<0.2	FLJ37543		0.913	-0.015	*	-3.1e-05	0.0001
cg07783480	13	93472825	0.0012	<0.2	GPC5		0.824	-0.023	*	-1.1e-05	2.8e-05
cg12945194	11	64703312	0.0012	<0.2	GPHA2		0.899	-0.0072	*	-0.00011	0.00015	*
cg01967399	4	174448084	0.0012	<0.2	HAND2	Shore	0.554	-0.062	*	8.1e-06	0.0002
cg02704907	6	27116113	0.0012	<0.2	HIST1H2BK	Shore	0.876	0.009		-0.00012	0.00013
cg15966954	5	135231547	0.0012	<0.2	IL9		0.738	-0.053	*	-0.00026	0.00019
cg01755369	19	10764728	0.0012	<0.2	ILF3	Island	0.07	0.022	*	3.1e-05	2.5e-05
cg06294416	12	66628232	0.0012	<0.2	IRAK3		0.837	-0.0093		6.2e-05	-0.00015
cg10899668	5	52284909	0.0012	<0.2	ITGA2	Island	0.104	-0.016	*	-0.00011	0.00024	*
cg20545410	10	33232548	0.0012	<0.2	ITGB1		0.347	0.036	*	0.00014	3.7e-05
cg18479973	10	7620546	0.0012	<0.2	ITIH5	Shore	0.863	0.011		-0.00016	0.00016
cg06820975	4	166129640	0.0012	<0.2	KLHL2	Shore	0.46	-0.032	*	-0.00023	0.00062	*
cg14482313	12	52626889	0.0012	<0.2	KRT7	Island	0.28	0.043	*	0.00017	-0.00069	*
cg24136314	4	41694736	0.0012	<0.2	LIMCH1		0.475	-0.04	*	-0.00011	0.00072	*
cg21235746	20	5485144	0.0012	<0.2	LOC149837		0.204	0.086	*	0.00034	-0.00077	*
cg26959945	7	20233217	0.0012	<0.2	MACC1		0.528	0.045	*	-0.00024	0.0003
cg00592593	22	50585197	0.0012	<0.2	MOV10L1		0.618	-0.028	*	-2.5e-05	2.3e-05
cg12940923	8	10282607	0.0012	<0.2	MSRA		0.656	-0.053	*	-0.00011	0.00015
cg00302979	4	124261820	0.0012	<0.2			0.739	0.03	*	-0.00012	0.00019
cg00776174	12	122442379	0.0012	<0.2			0.153	0.043	*	9e-07	-0.00037	*
cg01037703	22	45014547	0.0012	<0.2		Shore	0.804	-0.017	*	-8.2e-05	0.00025	*
cg01172310	6	31409505	0.0012	<0.2			0.114	-0.011		-0.0002	0.00041	*
cg02848315	11	117045620	0.0012	<0.2		Shelf	0.826	0.04	*	-8.9e-05	-0.00022
cg04753107	20	31172130	0.0012	<0.2		Island	0.185	0.0017		-6.9e-05	0.00022	*
cg04866029	1	2707161	0.0012	<0.2		Shore	0.848	0.0024		5.7e-05	-0.00021	*
cg05385282	1	201562364	0.0012	<0.2			0.759	0.0039		-0.00016	0.00036	*
cg05418915	2	196426178	0.0012	<0.2			0.346	0.052	*	0.00016	-0.00013
cg05733181	4	117847088	0.0012	<0.2		Island	0.111	0.027	*	-4.5e-05	-0.0002
cg07751298	8	112347536	0.0012	<0.2			0.651	0.029	*	0.00021	-0.00037	*
cg09455881	3	47388736	0.0012	<0.2			0.234	0.031	*	-5.7e-05	6.2e-05
cg10156499	11	112161291	0.0012	<0.2		Shore	0.169	0.029	*	3.3e-05	-0.00012
cg11685162	2	242844876	0.0012	<0.2		Island	0.944	-0.013		-0.00024	0.00033	*
cg13908827	2	240429013	0.0012	<0.2			0.86	-0.022	*	-0.00011	0.00024	*
cg17786042	8	19125368	0.0012	<0.2			0.162	-0.01		-0.00019	0.00038	*
cg18576835	19	13944261	0.0012	<0.2		Island	0.163	0.016		0.00026	-0.00049	*
cg18890544	1	242220538	0.0012	<0.2		Island	0.832	0.052	*	7.4e-05	-0.00033	*
cg19152255	20	52274268	0.0012	<0.2		Shelf	0.462	0.047	*	4.5e-05	6.5e-05
cg19616339	2	69164114	0.0012	<0.2			0.65	0.023	*	-0.00013	0.00015
cg20334252	15	53096248	0.0012	<0.2		Island	0.324	-0.05	*	-7.5e-05	0.00026
cg23481169	6	168672583	0.0012	<0.2			0.906	-0.026	*	-9.8e-05	2.9e-05
cg25615926	11	110862216	0.0012	<0.2			0.643	0.031	*	-6.8e-05	0.00019
cg26334558	12	51794933	0.0012	<0.2			0.91	-0.018	*	-0.00012	0.00027	*
cg27213872	2	206667827	0.0012	<0.2			0.213	0.023	*	0.00018	-0.00054	*
cg00696763	20	25602213	0.0012	<0.2	NANP	Shore	0.908	0.018	*	6e-05	-0.00017	*
cg27441486	1	201708522	0.0012	<0.2	NAV1	Shore	0.859	-0.029	*	-0.00027	0.00035	*
cg02837999	1	169338281	0.0012	<0.2	NME7		0.06	0.027	*	7.6e-05	-0.00019	*
cg18091275	17	26120155	0.0012	<0.2	NOS2	Shore	0.651	-0.022		-0.00042	0.00058	*
cg16046444	1	200004265	0.0012	<0.2	NR5A2	Shore	0.172	0.033	*	0.00014	-0.00039	*
cg12572278	11	120081259	0.0012	<0.2	OAF	Shore	0.142	0.00084		-8.6e-05	0.00039	*
cg03748376	1	248100585	0.0012	<0.2	OR2L13	Island	0.179	0.12		0.0012	-0.0021	*
cg14443953	11	31837124	0.0012	<0.2	PAX6	Island	0.273	-0.054	*	-0.00019	0.00079	*
cg06793728	12	54942853	0.0012	<0.2	PDE1B		0.477	-0.033	*	-6e-05	0.00022
cg22736323	4	55095529	0.0012	<0.2	PDGFRA	Shore	0.239	0.037	*	0.00023	-0.00052	*
cg24550112	1	14027521	0.0012	<0.2	PRDM2	Shore	0.45	-0.064	*	0.00025	-0.00042
cg22643740	22	37640514	0.0012	<0.2	RAC2		0.153	-0.02	*	1.7e-05	0.00014	*
cg00380172	6	148663585	0.0012	<0.2	SASH1	Island	0.469	0.015		-0.00021	0.00022
cg04352088	22	43609331	0.0012	<0.2	SCUBE1	Shelf	0.717	-0.025	*	-0.00014	0.00028	*
cg05016201	10	112682031	0.0012	<0.2	SHOC2	Shelf	0.807	0.029	*	1.4e-05	-0.00012
cg03599590	3	112282031	0.0012	<0.2	SLC35A5	Shore	0.283	-0.016		0.00033	-0.00053	*
cg06937617	10	134043362	0.0012	<0.2	STK32C	Shore	0.212	0.062	*	0.0003	-0.00034
cg00393798	11	8615694	0.0012	<0.2	STK33	Island	0.177	-0.042	*	9.6e-05	1.4e-05
cg05845592	16	28634766	0.0012	<0.2	SULT1A1	Island	0.193	-0.073	*	-0.00053	0.00045
cg06093993	6	132945592	0.0012	<0.2	TAAR2		0.865	0.024	*	0.00015	-0.00031	*
cg14827929	4	187002617	0.0012	<0.2	TLR3		0.923	0.0043		-8.2e-05	0.00014	*
cg01903374	1	151129844	0.0012	<0.2	TNFAIP8L2		0.167	0.033	*	0.00023	-0.00037	*
cg08337959	11	1948933	0.0012	<0.2	TNNT3	Island	0.631	-0.0087		-0.00025	0.0005	*
cg14286682	9	6328493	0.0012	<0.2	TPD52L3		0.765	0.018	*	0.00015	-0.00039	*
cg18505453	6	41254997	0.0012	<0.2	TREM1		0.507	0.049	*	-0.00011	-1.1e-05
cg23218397	1	216019172	0.0012	<0.2	USH2A		0.812	0.016	*	0.00015	-0.00033	*
cg22893405	7	6198604	0.0012	<0.2	USP42	Island	0.897	-0.016	*	-0.00014	0.00031	*
cg06768644	6	41863270	0.0012	<0.2	USP49	Island	0.041	0.014	*	5.6e-05	-7.5e-05
cg06817737	12	966396	0.0012	<0.2	WNK1		0.907	0.0032		-0.00012	0.00018	*
cg27565277	16	17228474	0.0012	<0.2	XYLT1		0.839	0.00091		0.00015	-0.00033	*
cg09279240	2	180726252	0.0012	<0.2	ZNF385B	Island	0.191	0.0069		3.1e-05	-0.00045	*
cg18270285	4	8151550	0.0013	<0.2	ABLIM2	Shelf	0.869	-0.015	*	-0.00023	0.00037	*
cg15292706	10	1404828	0.0013	<0.2	ADARB2	Island	0.906	-0.0093	*	7.9e-05	-4.7e-05
cg14715602	17	18088549	0.0013	<0.2	ALKBH5	Shore	0.265	-0.02		0.00021	-0.00024
cg22469948	19	50290079	0.0013	<0.2	AP2A1	Shore	0.765	-0.014	*	-0.0002	0.00036	*
cg18253910	22	30230951	0.0013	<0.2	ASCC2	Shelf	0.851	0.0063		0.00014	-0.00026	*
cg18372353	15	35838733	0.0013	<0.2	ATPBD4	Shore	0.109	-0.00088		-4.7e-05	0.00023	*
cg23051598	16	28834567	0.0013	<0.2	ATXN2L	Island	0.556	-0.0073		0.00034	-0.00083	*
cg17548395	10	60461164	0.0013	<0.2	BICC1		0.862	-0.035	*	-0.00017	0.00038	*
cg02637512	5	137476322	0.0013	<0.2	BRD8		0.879	-0.0042		7.4e-05	-0.0003	*
cg23224666	6	127796287	0.0013	<0.2	C6orf174	Island	0.86	0.0061		0.00028	-0.00037	*
cg03260624	1	91970722	0.0013	<0.2	CDC7	Shelf	0.595	0.029	*	0.00012	-0.00037	*
cg07295964	5	175223982	0.0013	<0.2	CPLX2	Island	0.073	-0.0013		8e-05	-0.00019	*
cg04359915	10	101825029	0.0013	<0.2	CPN1	Island	0.367	0.048	*	-1.1e-06	-0.00019
cg15616358	11	68610296	0.0013	<0.2	CPT1A	Shore	0.182	0.035	*	-7.4e-05	-0.00011
cg26858300	1	207643142	0.0013	<0.2	CR2		0.857	-0.011	*	3.5e-05	-0.00011
cg00166343	17	29150100	0.0013	<0.2	CRLF3	Shore	0.16	0.024	*	-3.9e-06	2.1e-05
cg12582003	9	131012968	0.0013	<0.2	DNM1	Island	0.193	0.025	*	0.00022	-0.00055	*
cg07205657	1	172061461	0.0013	<0.2	DNM3		0.913	-0.0031		1.8e-05	-0.00011	*
cg08078586	16	30017470	0.0013	<0.2	DOC2A		0.968	-0.01	*	2e-06	5.7e-05
cg00805320	16	68057225	0.0013	<0.2	DUS2L	Island	0.223	-0.01		-0.00013	0.00052	*
cg26525127	2	233350365	0.0013	<0.2	ECEL1	Island	0.108	-0.025	*	4e-05	0.00014
cg14328601	9	140209339	0.0013	<0.2	EXD3	Shore	0.951	-0.012	*	-3.1e-05	3.7e-05
cg01434694	16	88837185	0.0013	<0.2	FAM38A	Shore	0.551	0.01		0.00011	-0.00051	*
cg03492495	6	110015052	0.0013	<0.2	FIG4	Shelf	0.913	0.018	*	8.3e-05	-0.00023	*
cg10822352	10	13876378	0.0013	<0.2	FRMD4A		0.768	0.024	*	9.7e-05	-0.00022	*
cg01043865	5	37837978	0.0013	<0.2	GDNF	Island	0.176	-0.024	*	-1.7e-05	0.00011
cg01347776	3	179121836	0.0013	<0.2	GNB4		0.844	0.0029		-3.5e-05	0.00017	*
cg26996885	8	25281525	0.0013	<0.2	GNRH1		0.885	0.014	*	2.6e-05	-2.8e-05
cg12497319	19	6737669	0.0013	<0.2	GPR108	Island	0.485	0.0094		-0.00023	0.00039	*
cg07631309	10	106020930	0.0013	<0.2	GSTO1		0.53	0.016		-0.00021	0.00052	*
cg09739413	6	32729498	0.0013	<0.2	HLA-DQB2	Island	0.742	-0.056	*	-0.0005	0.00086	*
cg20294304	6	34203153	0.0013	<0.2	HMGA1	Island	0.142	0.023		0.00026	-0.00054	*
cg01301319	7	27153580	0.0013	<0.2	HOXA3	Island	0.77	-0.023	*	-3e-05	0.00019	*
cg08898569	11	125760891	0.0013	<0.2	HYLS1	Shelf	0.776	-0.017	*	2e-05	-3.1e-05
cg00714464	2	113670427	0.0013	<0.2	IL1F7		0.849	0.016	*	0.00011	-0.00029	*
cg10670077	19	7293341	0.0013	<0.2	INSR	Island	0.503	-0.014		-1.1e-05	-0.00028	*
cg05539515	1	62784269	0.0013	<0.2	KANK4	Island	0.135	0.035	*	7.7e-06	-0.00012
cg01575590	20	62084626	0.0013	<0.2	KCNQ2	Island	0.176	0.073	*	0.00025	-0.0004	*
cg00176638	1	202778443	0.0013	<0.2	KDM5B	Shore	0.772	-0.024		-0.00018	0.00056	*
cg05578357	12	21810868	0.0013	<0.2	LDHB	Shore	0.267	-0.044	*	-9.6e-05	0.00045	*
cg03565720	7	104459130	0.0013	<0.2	LHFPL3		0.785	0.04	*	4.3e-05	-9.4e-05
cg19651291	14	42091070	0.0013	<0.2	LRFN5		0.788	0.036	*	5.6e-05	-7.9e-05
cg19554257	12	116996931	0.0013	<0.2	MAP1LC3B2		0.204	0.027	*	7e-05	-5.6e-05
cg13852093	18	74770815	0.0013	<0.2	MBP	Shore	0.898	-0.011		-0.00015	0.00031	*
cg06946371	5	174151106	0.0013	<0.2	MSX2	Shore	0.121	-0.0041		-4.6e-05	0.00034	*
cg26958741	12	111358470	0.0013	<0.2	MYL2		0.844	-0.015	*	-0.00018	0.00038	*
cg02473254	8	2000469	0.0013	<0.2	MYOM2	Shelf	0.542	0.01		-0.00016	0.00045	*
cg00667937	2	168572563	0.0013	<0.2		Island	0.873	0.0045		-9.2e-05	0.00012	*
cg02295101	11	49124111	0.0013	<0.2		Island	0.855	0.0043		-0.00013	0.00015	*
cg02814858	3	129690199	0.0013	<0.2		Shelf	0.687	0.0013		0.00014	-0.00032	*
cg04226823	6	170473715	0.0013	<0.2		Shore	0.707	0.025		-0.00013	0.00039	*
cg04229986	10	2931961	0.0013	<0.2		Shore	0.8	0.0019		-0.00018	0.00048	*
cg05259966	11	124981320	0.0013	<0.2		Island	0.077	0.0068	*	5.4e-05	-0.00015	*
cg06354695	1	212643521	0.0013	<0.2			0.93	-0.02	*	-3.7e-05	0.00024	*
cg06612355	5	102834858	0.0013	<0.2			0.913	-0.0024		-8e-05	0.00016	*
cg07853425	5	134408820	0.0013	<0.2			0.768	-0.015	*	-3.5e-06	-0.00015
cg07959469	15	96885197	0.0013	<0.2		Shore	0.313	0.033	*	0.00017	-0.00022
cg08182454	19	46529189	0.0013	<0.2		Shelf	0.504	-0.037	*	9.1e-05	-0.00025
cg08917121	5	176097773	0.0013	<0.2			0.794	-0.025	*	-0.00011	0.00028	*
cg09155881	2	202937608	0.0013	<0.2			0.864	-0.0054		5.6e-05	-0.00021	*
cg10602282	7	155580322	0.0013	<0.2		Island	0.281	-0.053	*	-5e-06	0.00017
cg11188223	1	79658903	0.0013	<0.2			0.547	-0.0022		-0.0003	0.00073	*
cg11674664	1	152158135	0.0013	<0.2		Shelf	0.228	-0.041	*	-0.00022	0.00044	*
cg13011961	3	67291183	0.0013	<0.2			0.691	0.045		0.00021	-0.00065	*
cg13308080	6	26234061	0.0013	<0.2			0.143	-0.033	*	-0.00018	0.00037	*
cg14313315	12	114852856	0.0013	<0.2		Shore	0.474	-0.053	*	-0.00012	0.00017
cg14777342	12	57480090	0.0013	<0.2		Shore	0.152	0.035	*	2.9e-05	-0.00028	*
cg15382620	5	76921025	0.0013	<0.2		Shelf	0.279	0.064	*	0.00018	-0.00017
cg15695738	19	35329860	0.0013	<0.2		Island	0.966	-0.023	*	-0.00011	3.8e-05
cg17139392	12	66430294	0.0013	<0.2			0.621	-0.013		9.1e-05	-0.0002
cg17812664	10	104957217	0.0013	<0.2		Shelf	0.223	0.03	*	-8.5e-06	-0.00012
cg19107112	3	180550814	0.0013	<0.2		Shelf	0.887	0.0029		-0.00011	0.0003	*
cg19718563	19	37266748	0.0013	<0.2		Island	0.637	0.064	*	0.00061	-0.00083	*
cg19986254	11	2077522	0.0013	<0.2			0.759	0.028	*	0.00011	-0.00037	*
cg20150982	11	122311658	0.0013	<0.2			0.258	0.038	*	-6.6e-06	5.5e-05
cg20274950	4	187647402	0.0013	<0.2		Island	0.362	-0.039	*	0.00036	-0.00038
cg21170304	9	138879603	0.0013	<0.2		Shelf	0.798	-0.0025		5.7e-05	-0.00023	*
cg21918786	6	109611834	0.0013	<0.2		Island	0.863	0.0044		0.00013	-0.00021	*
cg23261319	2	182713409	0.0013	<0.2			0.396	0.065	*	-0.00018	7.2e-05
cg24422027	17	2659305	0.0013	<0.2		Island	0.128	-0.024	*	0.00022	-0.00021
cg24980856	2	14648452	0.0013	<0.2			0.808	0.0061		-6e-05	0.00019	*
cg26802564	1	30446406	0.0013	<0.2			0.667	-0.053	*	7.8e-05	-0.0002
cg27571374	19	2889256	0.0013	<0.2		Shore	0.607	0.063	*	0.00057	-0.00089	*
cg04118306	8	24772350	0.0013	<0.2	NEFM	Island	0.141	0.05	*	9.9e-05	-0.00069	*
cg00344178	1	183385831	0.0013	<0.2	NMNAT2	Shore	0.835	-0.04	*	0.00017	-6.4e-05
cg12244668	19	17566260	0.0013	<0.2	NXNL1	Shore	0.617	-0.032		-0.00018	0.00055	*
cg06898830	1	86861147	0.0013	<0.2	ODF2L	Shore	0.732	-0.024	*	-0.00017	0.0003	*
cg02370734	8	66702198	0.0013	<0.2	PDE7A		0.912	-0.0064	*	-2e-05	-6.4e-05
cg17072268	19	40853164	0.0013	<0.2	PLD3	Shore	0.747	0.024	*	0.00013	-0.00024	*
cg20711047	19	49644550	0.0013	<0.2	PPFIA3	Shore	0.803	0.028	*	0.00021	-0.00041	*
cg03638781	16	23880664	0.0013	<0.2	PRKCB		0.11	0.025	*	2.1e-05	-0.00019	*
cg24776480	1	2066446	0.0013	<0.2	PRKCZ	Island	0.819	0.002		-0.00017	0.00032	*
cg26118435	2	161350826	0.0013	<0.2	RBMS1	Shore	0.264	-0.026	*	-9.6e-05	0.00012
cg02399048	8	22000318	0.0013	<0.2	REEP4	Shore	0.487	-0.02		-0.00023	0.00058	*
cg13209481	14	36973483	0.0013	<0.2	SFTA3	Island	0.427	0.047	*	0.00023	-0.001	*
cg05962106	11	64329383	0.0013	<0.2	SLC22A11	Shore	0.817	0.014		0.00013	-0.00044	*
cg15105576	6	33170452	0.0013	<0.2	SLC39A7	Shore	0.781	-0.019	*	5.9e-05	-0.0001
cg19040385	10	108690391	0.0013	<0.2	SORCS1		0.816	0.028	*	4.3e-05	-0.00013
cg01003961	7	20824706	0.0013	<0.2	SP8	Island	0.503	-0.11	*	5e-05	0.00037
cg03330516	20	62178744	0.0013	<0.2	SRMS	Island	0.809	-0.044	*	-6.7e-06	0.00027
cg04129308	6	134214995	0.0013	<0.2	TCF21	Shore	0.379	0.016		0.00018	-0.00072	*
cg15840079	11	60691621	0.0013	<0.2	TMEM132A	Shore	0.19	-0.0074		0.00019	-0.00028	*
cg11240425	22	39078365	0.0013	<0.2	TOMM22	Island	0.203	-0.026	*	0.00031	-0.00025
cg04133572	1	161195810	0.0013	<0.2	TOMM40L		0.212	-0.033	*	-0.00014	0.00033	*
cg11400286	8	140929260	0.0013	<0.2	TRAPPC9		0.832	0.0096		-0.00013	0.00017
cg00292432	12	3393872	0.0013	<0.2	TSPAN9		0.608	0.03	*	-7.7e-05	0.00031	*
cg04973493	7	158886149	0.0013	<0.2	VIPR2	Shore	0.852	-0.025	*	-0.00017	0.00029	*
cg05071493	20	2844659	0.0013	<0.2	VPS16		0.917	-0.02	*	-6.8e-05	3.3e-05
cg06940756	8	10927738	0.0013	<0.2	XKR6	Shore	0.826	-0.0026		-0.00019	0.00035	*
cg07703530	8	81422474	0.0013	<0.2	ZBTB10		0.787	-0.033	*	-3.1e-05	0.00031	*
cg21493505	19	56879418	0.0013	<0.2	ZNF542	Island	0.326	0.0063		0.00014	-0.0003	*
cg00019275	19	35249217	0.0013	<0.2	ZNF599		0.733	0.011		0.00013	-0.00031	*
cg26778345	16	8806586	0.0014	<0.2	ABAT		0.363	0.031	*	-9e-05	0.00028
cg09945896	16	2335328	0.0014	<0.2	ABCA3	Shore	0.904	-0.011	*	6.1e-05	-0.00011
cg17759443	20	3662724	0.0014	<0.2	ADAM33	Island	0.235	-0.026	*	0.00035	-0.00019
cg17273588	2	100760351	0.0014	<0.2	AFF3		0.753	-0.00059		0.00021	-0.00029	*
cg09250727	20	32899784	0.0014	<0.2	AHCY		0.219	-0.041	*	-3.5e-05	4.8e-05
cg18070562	17	8013617	0.0014	<0.2	ALOXE3	Island	0.104	-0.015	*	-4.7e-05	0.00015	*
cg06393998	5	74531185	0.0014	<0.2	ANKRD31	Shore	0.82	0.0092		0.00016	-0.00033	*
cg03636174	2	69968926	0.0014	<0.2	ANXA4	Island	0.088	0.011	*	-1.2e-05	-9.5e-05	*
cg17166103	19	49298422	0.0014	<0.2	BCAT2	Island	0.411	-0.047	*	-0.00013	0.00031	*
cg12781086	7	34118554	0.0014	<0.2	BMPER	Island	0.748	0.059	*	0.00038	-0.0008	*
cg18509719	11	1469746	0.0014	<0.2	BRSK2	Shore	0.889	-0.019	*	-6.9e-05	8.2e-05
cg01612681	11	2322386	0.0014	<0.2	C11orf21		0.19	0.022		0.00032	-0.00049	*
cg18057548	19	3617614	0.0014	<0.2	C19orf29	Shelf	0.311	0.033	*	-5.3e-05	-0.00028	*
cg05486551	20	5731259	0.0014	<0.2	C20orf196		0.291	-0.05	*	-6.1e-06	0.00017
cg12727529	3	42307761	0.0014	<0.2	CCK	Shore	0.678	0.057	*	0.00015	-0.00038	*
cg04283637	6	74405447	0.0014	<0.2	CD109	Shore	0.127	0.018	*	0.00017	-0.00031	*
cg02050426	18	59221458	0.0014	<0.2	CDH20	Island	0.426	0.13	*	0.00029	-0.00088	*
cg14310696	3	87276184	0.0014	<0.2	CHMP2B	Island	0.2	0.009		0.00013	-0.00029	*
cg11195797	13	100547331	0.0014	<0.2	CLYBL	Island	0.204	0.045	*	0.00013	-0.00054	*
cg06418475	19	17008851	0.0014	<0.2	CPAMD8	Island	0.499	-0.064	*	-7.7e-05	0.00022
cg23991274	4	71860600	0.0014	<0.2	DCK	Shore	0.133	0.025	*	5.4e-05	-0.0003	*
cg23299218	13	60247295	0.0014	<0.2	DIAPH3		0.644	0.0044		-9.2e-05	0.00034	*
cg17499826	19	46284986	0.0014	<0.2	DMPK	Shore	0.793	-0.032	*	1.3e-05	0.00027	*
cg05340255	1	78470449	0.0014	<0.2	DNAJB4		0.21	-0.042	*	4.9e-05	-6.3e-05
cg14775286	3	137833494	0.0014	<0.2	DZIP1L	Shore	0.445	-0.038	*	-0.00032	0.00051	*
cg16065186	17	37856663	0.0014	<0.2	ERBB2	Island	0.171	-0.015		0.00013	-0.00035	*
cg08224773	8	11311868	0.0014	<0.2	FAM167A		0.776	-0.023	*	0.00016	-0.00021
cg03831847	16	88832485	0.0014	<0.2	FAM38A		0.831	-0.0031		0.00011	-0.00038	*
cg24946941	7	37779122	0.0014	<0.2	GPR141		0.861	0.028	*	0.00011	-0.00025	*
cg23244913	6	29943401	0.0014	<0.2	HCG9	Shore	0.236	0.0036		0.0002	-0.00073	*
cg26392102	6	31238751	0.0014	<0.2	HLA-C	Shore	0.528	-0.014		-0.00029	0.0004	*
cg23289024	14	102554846	0.0014	<0.2	HSP90AA1	Shore	0.108	0.018	*	0.00013	-0.00022	*
cg23591853	2	27712996	0.0014	<0.2	IFT172	Shore	0.22	0.04	*	0.00021	-0.00055	*
cg01305421	12	102874286	0.0014	<0.2	IGF1		0.293	-0.0025		-8.8e-05	0.00051	*
cg20459035	5	128433455	0.0014	<0.2	ISOC1	Shelf	0.852	0.0029		-5.7e-05	0.00024	*
cg23941434	5	147162161	0.0014	<0.2	JAKMIP2		0.123	0.031	*	8.5e-05	-0.00049	*
cg14131889	17	39913822	0.0014	<0.2	JUP	Island	0.895	-0.0066	*	6.4e-06	2e-06
cg09966038	19	11287317	0.0014	<0.2	KANK2	Shore	0.893	0.022	*	-1.9e-05	-0.0001
cg27295678	1	155904147	0.0014	<0.2	KIAA0907	Island	0.127	0.022	*	5.8e-05	-6.5e-05
cg20766179	3	134361914	0.0014	<0.2	KY		0.697	0.02	*	0.00014	-0.00033	*
cg12251939	17	37028295	0.0014	<0.2	LASP1	Shore	0.65	-0.027	*	2.8e-05	-9.3e-05
cg18567687	15	59499164	0.0014	<0.2	LDHAL6B	Island	0.906	-0.014	*	-8.6e-05	0.00021	*
cg03742132	12	81227142	0.0014	<0.2	LIN7A		0.809	0.017	*	0.00012	-0.00042	*
cg27117491	2	39186743	0.0014	<0.2	LOC375196	Shore	0.828	0.019		-8.1e-05	0.00027
cg00981267	22	46402486	0.0014	<0.2	LOC730668		0.103	-0.0046		-6e-05	0.00018	*
cg06945399	7	127671195	0.0014	<0.2	LRRC4	Island	0.109	0.015		0.00017	-0.00037	*
cg00515669	19	44307449	0.0014	<0.2	LYPD5		0.637	0.043	*	4.1e-05	-0.00021
cg26946769	18	48189538	0.0014	<0.2	MAPK4	Shore	0.848	-0.00074		0.0002	-0.00026	*
cg02276823	7	5000111	0.0014	<0.2	MMD2	Shore	0.82	-0.084	*	-0.00014	0.00043	*
cg06790862	11	30601783	0.0014	<0.2	MPPED2	Shelf	0.902	0.018	*	5.6e-05	-0.00015	*
cg00778858	8	17658543	0.0014	<0.2	MTUS1	Island	0.131	-0.024	*	-4.5e-05	0.0001
cg10747785	22	36681296	0.0014	<0.2	MYH9		0.907	-0.015	*	-0.00013	0.00029	*
cg00454862	1	192983012	0.0014	<0.2			0.885	-0.014		-9.7e-05	0.00037	*
cg03707967	6	118097745	0.0014	<0.2			0.738	-0.059	*	-1.1e-05	0.00048	*
cg07300386	6	168529652	0.0014	<0.2		Shore	0.782	0.0034		0.00015	-0.00038	*
cg09269336	13	96056495	0.0014	<0.2			0.362	-0.038	*	-0.00013	0.00044	*
cg09377980	3	66798910	0.0014	<0.2			0.896	-0.02	*	-4.9e-06	7.9e-05
cg11262850	5	154071158	0.0014	<0.2		Shore	0.304	0.071	*	0.00018	-0.00036	*
cg11858252	15	93257913	0.0014	<0.2		Island	0.273	-0.038	*	-0.00016	0.00033	*
cg14113958	9	117657237	0.0014	<0.2			0.6	0.026		-8.9e-05	0.00031
cg15819405	7	128079085	0.0014	<0.2			0.848	0.00033		-0.00017	0.00033	*
cg16126754	10	133156058	0.0014	<0.2			0.396	0.04		-0.00024	0.00047	*
cg17573301	5	72732265	0.0014	<0.2		Shore	0.153	-0.0029		-0.00018	0.00036	*
cg17649599	3	84175248	0.0014	<0.2			0.874	0.014	*	0.00025	-0.00036	*
cg19814159	6	28719517	0.0014	<0.2			0.54	-0.07	*	9.7e-05	5.7e-05
cg20738433	10	85324857	0.0014	<0.2		Island	0.927	-0.014	*	-2.9e-05	0.0002	*
cg21008530	7	88229994	0.0014	<0.2			0.827	0.023	*	0.00015	-0.00039	*
cg21184327	9	139047016	0.0014	<0.2			0.738	0.0075		0.00031	-0.00053	*
cg24896053	10	8553099	0.0014	<0.2		Shelf	0.882	-0.021	*	-6.7e-05	0.00014
cg14834267	1	201617847	0.0014	<0.2	NAV1	Island	0.206	0.013		0.00014	-0.00049	*
cg25160605	11	21087846	0.0014	<0.2	NELL1		0.755	-0.05	*	-0.00021	0.00047	*
cg25666403	22	30662994	0.0014	<0.2	OSM		0.096	0.024	*	-4.6e-05	-3.7e-05
cg13875133	9	118917650	0.0014	<0.2	PAPPA	Shore	0.235	-0.032	*	-0.00026	0.00052	*
cg24243914	10	89418206	0.0014	<0.2	PAPSS2	Shore	0.837	-0.0025		-4.7e-05	0.00026	*
cg06178299	1	18967508	0.0014	<0.2	PAX7	Island	0.269	0.033	*	2.4e-05	-0.00011
cg02326566	5	140220686	0.0014	<0.2	PCDHA6	Shore	0.823	-0.058	*	-0.00017	0.00056	*
cg00326908	8	66755120	0.0014	<0.2	PDE7A	Shore	0.605	-0.0069		-0.00024	0.00066	*
cg13832441	12	45585210	0.0014	<0.2	PLEKHA9		0.587	0.042	*	0.00015	-0.00037	*
cg04880052	2	219191631	0.0014	<0.2	PNKD	Shelf	0.667	0.023	*	0.0002	-0.00046	*
cg00740465	7	158220708	0.0014	<0.2	PTPRN2	Island	0.949	-0.016	*	7.2e-06	7.4e-05
cg00689534	15	79282030	0.0014	<0.2	RASGRF1		0.873	-0.0056		4.9e-05	-0.00014	*
cg03302951	12	122230972	0.0014	<0.2	RHOF	Island	0.155	0.024	*	7.6e-05	-0.00039	*
cg18235937	1	6268858	0.0014	<0.2	RNF207	Island	0.399	0.032		0.00026	-0.0012	*
cg18737534	17	1800702	0.0014	<0.2	RPA1	Shore	0.926	-0.012	*	-7.6e-05	0.00018	*
cg18446578	5	115908322	0.0014	<0.2	SEMA6A	Shore	0.213	-0.043	*	-0.00025	0.00052	*
cg22621734	5	148442740	0.0014	<0.2	SH3TC2		0.437	0.041	*	-5e-05	-3.5e-05
cg08958168	16	68001415	0.0014	<0.2	SLC12A4	Shore	0.584	-0.018	*	5.3e-05	-7.8e-05
cg23431175	6	31846813	0.0014	<0.2	SLC44A4		0.59	-0.018		0.00034	-0.00056	*
cg18023283	12	85306828	0.0014	<0.2	SLC6A15	Island	0.321	-0.0028		0.00043	-0.00071	*
cg20253807	10	133000130	0.0014	<0.2	TCERG1L		0.816	0.02	*	1.1e-05	-9.8e-05
cg09786701	20	2539517	0.0014	<0.2	TMC2	Island	0.353	-0.052	*	-3.6e-05	0.00041	*
cg13386070	1	175046885	0.0014	<0.2	TNN	Shore	0.726	-0.011		0.00016	-0.00023	*
cg07988171	19	16199419	0.0014	<0.2	TPM4		0.751	0.032	*	0.00019	-0.00048	*
cg27351624	6	30073747	0.0014	<0.2	TRIM31	Shelf	0.82	0.018	*	0.00014	-0.00024	*
cg16907527	6	43744388	0.0014	<0.2	VEGFA		0.825	-0.012		6.9e-05	-0.00018
cg23456221	3	55518441	0.0014	<0.2	WNT5A	Shore	0.181	0.026	*	4.9e-05	-0.00017
cg08540215	7	150548765	0.0015	<0.2	ABP1		0.215	0.033	*	0.00015	-0.00039	*
cg09142020	2	236402329	0.0015	<0.2	AGAP1	Island	0.112	0.027	*	9.9e-05	-0.00023	*
cg03320492	1	45187810	0.0015	<0.2	C1orf228	Shore	0.296	0.055	*	0.0003	-0.00065	*
cg11105585	21	45759228	0.0015	<0.2	C21orf2	Island	0.213	-0.037	*	-0.00014	0.00028	*
cg10724947	15	62359485	0.0015	<0.2	C2CD4A	Shore	0.118	-0.021	*	-0.00011	0.00025	*
cg19922189	5	139505246	0.0015	<0.2	C5orf53		0.927	-0.0011		4.7e-05	-0.00011	*
cg00820995	19	54415986	0.0015	<0.2	CACNG7	Shelf	0.371	-0.045		-0.00019	0.00096	*
cg15300856	21	44497019	0.0015	<0.2	CBS	Shore	0.193	-0.041	*	-9.9e-05	0.00031	*
cg00589578	11	85565966	0.0015	<0.2	CCDC83	Island	0.207	-0.044	*	2.5e-05	0.00029	*
cg02099418	2	204571146	0.0015	<0.2	CD28		0.197	0.033	*	8.9e-05	-0.00024	*
cg11139878	1	157811790	0.0015	<0.2	CD5L		0.874	-0.018	*	-2.6e-05	3.8e-05
cg00333824	18	63417605	0.0015	<0.2	CDH7	Shore	0.2	-0.016		-0.00014	0.00049	*
cg02498983	6	88875398	0.0015	<0.2	CNR1	Island	0.197	0.034	*	9.6e-06	-0.00042	*
cg25340361	2	62131978	0.0015	<0.2	COMMD1		0.635	0.0092		-9.6e-06	0.0002	*
cg06038133	17	27944585	0.0015	<0.2	CORO6	Island	0.255	-0.055	*	-0.00026	0.00024
cg13099429	14	70827109	0.0015	<0.2	COX16	Shore	0.801	-0.078	*	-0.00022	0.00048	*
cg16489610	7	129913310	0.0015	<0.2	CPA2		0.271	-0.029	*	-1.4e-05	0.00011
cg11657817	20	23433608	0.0015	<0.2	CST11		0.72	-0.071	*	-6.7e-05	0.00032
cg25814649	13	107143980	0.0015	<0.2	EFNB2	Shore	0.216	0.032	*	-3.9e-05	-2.6e-05
cg21586152	19	853540	0.0015	<0.2	ELANE	Shore	0.494	-0.012		0.00028	-0.00041	*
cg21052415	13	25746587	0.0015	<0.2	FAM123A	Shore	0.481	0.053	*	0.00012	-0.00047	*
cg03283421	10	124610984	0.0015	<0.2	FAM24B		0.848	-0.022	*	-0.00011	0.00026	*
cg15922246	7	150778803	0.0015	<0.2	FASTK	Island	0.611	0.026	*	-7.8e-05	0.00017
cg23949216	22	47021746	0.0015	<0.2	GRAMD4	Shore	0.8	-0.0044		0.00016	-0.00032	*
cg01647632	15	89438905	0.0015	<0.2	HAPLN3	Shore	0.209	0.039	*	0.00019	-0.0006	*
cg24855943	6	26235224	0.0015	<0.2	HIST1H1D		0.168	-0.037	*	-0.00016	0.00041	*
cg26588194	5	149379518	0.0015	<0.2	HMGXB3	Shore	0.445	0.081	*	0.00011	0.00011
cg16619193	1	206643301	0.0015	<0.2	IKBKE		0.509	-0.033	*	-5.8e-05	-1.1e-05
cg12300382	7	50467567	0.0015	<0.2	IKZF1	Island	0.757	0.028	*	7.7e-05	-0.00023	*
cg27324619	22	31518860	0.0015	<0.2	INPP5J		0.8	-0.023	*	-7.1e-06	-4e-05
cg20941453	1	111148858	0.0015	<0.2	KCNA2	Shore	0.278	-0.033	*	-0.00012	0.00033	*
cg16558994	1	21023132	0.0015	<0.2	KIF17	Island	0.502	-0.18	*	0.0006	-0.00016
cg09765815	16	87778876	0.0015	<0.2	KLHDC4		0.715	0.0043		-9.5e-05	0.00017	*
cg02087272	2	23850319	0.0015	<0.2	KLHL29	Shore	0.884	-0.019	*	-4.8e-05	0.00026	*
cg26400954	13	76291075	0.0015	<0.2	LMO7		0.735	0.038	*	0.00028	-0.00055	*
cg14974644	4	7758332	0.0015	<0.2	LOC84740		0.791	0.0095		-0.00013	0.00016
cg21621104	3	66468921	0.0015	<0.2	LRIG1		0.732	-0.017	*	-0.00013	0.00028	*
cg18735798	3	194392871	0.0015	<0.2	LSG1	Island	0.253	-0.013		-0.00018	0.00033	*
cg10879244	11	64577190	0.0015	<0.2	MEN1	Shore	0.596	0.041	*	3.8e-05	-0.00031	*
cg14948379	2	105657348	0.0015	<0.2	MRPS9	Shelf	0.918	-0.019	*	-4e-05	0.00011
cg00876757	16	33483591	0.0015	<0.2		Shore	0.601	0.048		0.00052	-0.00089	*
cg00954256	1	56278506	0.0015	<0.2			0.721	0.035	*	0.00012	-0.00025
cg01656588	5	3187100	0.0015	<0.2		Shore	0.827	-0.011		-0.00015	0.00036	*
cg02432274	16	88378468	0.0015	<0.2			0.95	-0.015	*	-2.5e-05	9.7e-05
cg04105683	16	30032706	0.0015	<0.2		Shore	0.175	-0.032	*	-0.0002	0.0003	*
cg05134945	3	188665466	0.0015	<0.2		Island	0.227	0.036	*	0.00034	-0.00085	*
cg06442684	5	172982992	0.0015	<0.2			0.772	0.036	*	7.5e-05	-0.00011
cg07568588	1	88338001	0.0015	<0.2			0.634	-0.0048		-0.0003	0.00059	*
cg09003523	10	5452303	0.0015	<0.2		Shelf	0.831	0.0029		8.7e-05	-0.00027	*
cg10227629	1	217325755	0.0015	<0.2			0.837	-0.0091		6e-05	-0.00019	*
cg12118832	3	50264486	0.0015	<0.2		Island	0.089	0.013	*	-3.1e-06	-3.6e-06
cg12593431	13	112240754	0.0015	<0.2		Shore	0.745	0.029	*	0.00015	-0.00024	*
cg12739454	1	164290833	0.0015	<0.2		Shore	0.189	-0.042	*	-5e-05	0.00032	*
cg13683667	1	9527208	0.0015	<0.2			0.908	-0.039	*	-6.7e-05	0.0002
cg15043935	19	2487819	0.0015	<0.2		Shore	0.522	0.025	*	-0.00022	0.00014
cg17128767	4	72686016	0.0015	<0.2			0.79	-0.024	*	-3.8e-06	0.00017
cg19857227	14	95240340	0.0015	<0.2		Island	0.695	-0.035	*	-0.00013	0.0004	*
cg22897419	3	147449682	0.0015	<0.2			0.735	0.012		0.0002	-0.00035	*
cg23516002	7	128099617	0.0015	<0.2		Shelf	0.362	-0.051	*	-6.4e-06	2.7e-05
cg23619399	13	79169753	0.0015	<0.2		Shore	0.185	0.016		-2.1e-05	0.00027	*
cg24813206	6	112279998	0.0015	<0.2			0.509	0.069	*	6.4e-05	-0.00019
cg27302255	12	20336617	0.0015	<0.2			0.874	-0.014	*	-8.5e-05	0.00028	*
cg03839794	14	34269541	0.0015	<0.2	NPAS3	Island	0.245	0.047	*	0.00049	-0.0011	*
cg11725182	1	5968678	0.0015	<0.2	NPHP4		0.676	0.005		-0.00019	0.00021	*
cg00158308	13	97646341	0.0015	<0.2	OXGR1	Shore	0.141	0.017		7.9e-07	0.00023
[truncated: 670 more rows]
