# Supplementary material for: Cell-Free DNA Modification Dynamics in Abiraterone Acetate-Treated Prostate Cancer Patients
Source: Oxford University Press journal article supplement (doi:10.1158/1078-0432.ccr-18-0101), 2018-04-03
Supplement: 10780432ccr180101-sup-195306_2_supp_4641500_p5xh38.xlsx [file 10780432ccr180101-sup-195306_2_supp_4641500_p5xh38.xlsx]

## Sheet: AA-DMP GO terms
Term	Count	%	PValue	Genes	List Total	Pop Hits	Pop Total	Fold Enrichment	Bonferroni	Benjamini	FDR
GO:0044767~single-organism developmental process	642	35.2747	2.21e-13	NM_005091, NM_001014434, NM_025069, NM_001922, NM_017519, NM_004210, NM_002586, NM_002587, NM_024729, NM_002590, NM_080860, NM_001122659, NM_001130715, NM_001130716, NM_001135648, NM_013302, NM_032531, NM_000278, NM_001008844, NM_080676, NM_002599, NM_153453, NM_080872, NM_080679, NM_000283, NM_001033886, NM_000244, NM_001135610, NM_007073, NM_001135188, NM_005076, NM_001135187, NM_001040158, NM_…	1519	5122	15185	1.253	1.91e-09	1.91e-09	4.45e-12
GO:0048856~anatomical structure development	642	35.2747	2.37e-13	NM_005091, NM_001014434, NM_025069, NM_001922, NM_017519, NM_004210, NM_002586, NM_002587, NM_024729, NM_002590, NM_080860, NM_001122659, NM_001135648, NM_013302, NM_032531, NM_000278, NM_001008844, NM_080676, NM_002599, NM_153453, NM_080872, NM_080679, NM_000283, NM_001033886, NM_000244, NM_001135610, NM_007073, NM_001135188, NM_005076, NM_001135187, NM_001040158, NM_007074, NM_001136046, NM_021…	1519	5124	15185	1.25251	2.05e-09	1.02e-09	4.77e-12
GO:0032502~developmental process	656	36.044	3.72e-13	NM_005091, NM_001014434, NM_025069, NM_001922, NM_017519, NM_004210, NM_002586, NM_002587, NM_024729, NM_002590, NM_001122659, NM_080860, NM_001130715, NM_001130716, NM_001135648, NM_013302, NM_032531, NM_000278, NM_001008844, NM_080676, NM_002599, NM_153453, NM_080872, NM_080679, NM_000283, NM_001033886, NM_000244, NM_173159, NM_001135610, NM_007073, NM_001135188, NM_005076, NM_001135187, NM_001…	1519	5267	15185	1.24508	3.22e-09	1.07e-09	7.5e-12
GO:0048731~system development	524	28.7912	4.04e-13	NM_005091, NM_001014434, NM_025069, NM_001922, NM_004210, NM_017519, NM_002587, NM_024729, NM_001122659, NM_001135648, NM_032531, NM_013302, NM_000278, NM_001008844, NM_080676, NM_002599, NM_153453, NM_080872, NM_080679, NM_000283, NM_001033886, NM_000244, NM_007073, NM_005076, NM_001040158, NM_021599, NM_016580, NM_025099, NM_205860, NM_001703, NM_199367, NM_001200, NM_006312, NM_080657, NM_0012…	1519	4029	15185	1.30014	3.49e-09	8.72e-10	8.12e-12
GO:0007275~multicellular organism development	581	31.9231	5.1e-13	NM_005091, NM_001014434, NM_025069, NM_001922, NM_017519, NM_004210, NM_002586, NM_002587, NM_024729, NM_002590, NM_001122659, NM_001135648, NM_013302, NM_032531, NM_000278, NM_001008844, NM_080676, NM_002599, NM_153453, NM_080872, NM_080679, NM_000283, NM_001033886, NM_000244, NM_001135610, NM_007073, NM_001135188, NM_005076, NM_001135187, NM_001040158, NM_021599, NM_001135189, NM_016580, NM_001…	1519	4565	15185	1.27231	4.41e-09	8.82e-10	1.03e-11
GO:0007399~nervous system development	301	16.5385	5.47e-13	NM_001014434, NM_213594, NM_001922, NM_004210, NM_017519, NM_002587, NM_018905, NM_153348, NM_018900, NM_004348, NM_001122659, NM_030760, NM_018908, NM_018909, NM_018906, NM_018907, NM_032638, NM_001135648, NM_032531, NM_013302, NM_000278, NM_080676, NM_001145648, NM_005348, NM_080872, NM_018910, NM_018911, NM_024876, NM_000384, NM_001165037, NM_001033886, NM_000244, NM_005076, NM_016441, NM_0165…	1519	2052	15185	1.46638	4.73e-09	7.89e-10	1.1e-11
GO:0007399~nervous system development	301	16.5385	5.47e-13	NM_001014434, NM_213594, NM_001922, NM_004210, NM_017519, NM_002587, NM_018905, NM_153348, NM_018900, NM_004348, NM_001122659, NM_030760, NM_018908, NM_018909, NM_018906, NM_018907, NM_032638, NM_001135648, NM_032531, NM_013302, NM_000278, NM_080676, NM_001145648, NM_005348, NM_080872, NM_018910, NM_018911, NM_024876, NM_000384, NM_001165037, NM_001033886, NM_000244, NM_005076, NM_016441, NM_0165…	1519	2052	15185	1.46638	4.73e-09	7.89e-10	1.1e-11
GO:0030154~cell differentiation	455	25	1.11e-12	NM_005091, NM_001014434, NM_025069, NM_001922, NM_004210, NM_017519, NM_080860, NM_001122659, NM_001130715, NM_001130716, NM_032531, NM_013302, NM_001135648, NM_000278, NM_001008844, NM_002599, NM_080872, NM_080679, NM_001033886, NM_000244, NM_021795, NM_007073, NM_001135188, NM_005781, NM_001135187, NM_005076, NM_001040158, NM_001136046, NM_001135189, NM_016580, NM_001145160, NM_001093767, NM_18…	1519	3420	15185	1.32997	9.57e-09	1.37e-09	2.23e-11
GO:0044707~single-multicellular organism process	681	37.4176	2.06e-12	NM_005091, NM_001014434, NM_025069, NM_001922, NM_017519, NM_004210, NM_002586, NM_002587, NM_024729, NM_002387, NM_002590, NM_001122659, NM_001130715, NM_001130716, NM_001135648, NM_013302, NM_032531, NM_000278, NM_001008844, NM_080676, NM_002599, NM_153453, NM_058216, NM_080872, NM_080679, NM_000283, NM_001033886, NM_000244, NM_001135610, NM_007073, NM_001135188, NM_005076, NM_001135187, NM_001…	1519	5549	15185	1.22684	1.78e-08	2.23e-09	4.15e-11
GO:0048869~cellular developmental process	488	26.8132	2.38e-12	NM_005091, NM_001014434, NM_025069, NM_001922, NM_004210, NM_017519, NM_024729, NM_080860, NM_001122659, NM_001130715, NM_001130716, NM_001135648, NM_032531, NM_013302, NM_000278, NM_001008844, NM_002599, NM_080872, NM_080679, NM_001033886, NM_000244, NM_021795, NM_007073, NM_001135188, NM_005781, NM_001135187, NM_005076, NM_007074, NM_001040158, NM_001136046, NM_001135189, NM_016580, NM_00114516…	1519	3737	15185	1.30543	2.05e-08	2.28e-09	4.78e-11
GO:0048468~cell development	276	15.1648	5.43e-12	NM_001014434, NM_025069, NM_001922, NM_004210, NM_017519, NM_153348, NM_004348, NM_080860, NM_001122659, NM_030760, NM_032638, NM_001135648, NM_032531, NM_013302, NM_000278, NM_001145648, NM_002599, NM_080872, NM_001165037, NM_001033886, NM_000244, NM_001135188, NM_007073, NM_001135187, NM_005076, NM_001136046, NM_001135189, NM_005360, NM_016580, NM_002473, NM_001093767, NM_001145412, NM_00114541…	1519	1878	15185	1.46916	4.69e-08	4.69e-09	1.09e-10
GO:0048468~cell development	276	15.1648	5.43e-12	NM_001014434, NM_025069, NM_001922, NM_004210, NM_017519, NM_153348, NM_004348, NM_080860, NM_001122659, NM_030760, NM_032638, NM_001135648, NM_032531, NM_013302, NM_000278, NM_001145648, NM_002599, NM_080872, NM_001165037, NM_001033886, NM_000244, NM_001135188, NM_007073, NM_001135187, NM_005076, NM_001136046, NM_001135189, NM_005360, NM_016580, NM_002473, NM_001093767, NM_001145412, NM_00114541…	1519	1878	15185	1.46916	4.69e-08	4.69e-09	1.09e-10
GO:0048468~cell development	276	15.1648	5.43e-12	NM_001014434, NM_025069, NM_001922, NM_004210, NM_017519, NM_153348, NM_004348, NM_080860, NM_001122659, NM_030760, NM_032638, NM_001135648, NM_032531, NM_013302, NM_000278, NM_001145648, NM_002599, NM_080872, NM_001165037, NM_001033886, NM_000244, NM_001135188, NM_007073, NM_001135187, NM_005076, NM_001136046, NM_001135189, NM_005360, NM_016580, NM_002473, NM_001093767, NM_001145412, NM_00114541…	1519	1878	15185	1.46916	4.69e-08	4.69e-09	1.09e-10
GO:0009653~anatomical structure morphogenesis	340	18.6813	3.25e-10	NM_001014434, NM_213594, NM_025069, NM_004210, NM_002586, NM_024729, NM_153348, NM_004348, NM_002590, NM_080860, NM_032638, NM_007349, NM_013302, NM_032531, NM_198517, NM_000278, NM_001008844, NM_000379, NM_080872, NM_024876, NM_080679, NM_000384, NM_007353, NM_001033886, NM_007073, NM_001080447, NM_001135188, NM_005076, NM_001135187, NM_007074, NM_001135189, NM_000104, NM_002473, NM_001093767, N…	1519	2507	15185	1.35576	2.81e-06	2.55e-07	6.54e-09
GO:0009653~anatomical structure morphogenesis	340	18.6813	3.25e-10	NM_001014434, NM_213594, NM_025069, NM_004210, NM_002586, NM_024729, NM_153348, NM_004348, NM_002590, NM_080860, NM_032638, NM_007349, NM_013302, NM_032531, NM_198517, NM_000278, NM_001008844, NM_000379, NM_080872, NM_024876, NM_080679, NM_000384, NM_007353, NM_001033886, NM_007073, NM_001080447, NM_001135188, NM_005076, NM_001135187, NM_007074, NM_001135189, NM_000104, NM_002473, NM_001093767, N…	1519	2507	15185	1.35576	2.81e-06	2.55e-07	6.54e-09
GO:0022008~neurogenesis	206	11.3187	1.65e-09	NM_001014434, NM_001922, NM_004210, NM_017519, NM_000609, NM_153348, NM_004348, NM_001098635, NM_001122659, NM_001160259, NM_030760, NM_001160258, NM_012152, NM_032638, NM_000514, NM_001135648, NM_013302, NM_001025201, NM_032531, NM_000278, NM_014946, NM_003743, NM_001122819, NM_001145648, NM_001143806, NM_001143805, NM_005348, NM_004093, NM_080872, NM_001165037, NM_152989, NM_001033886, NM_00104…	1519	1382	15185	1.4901	1.42e-05	1.18e-06	3.31e-08
GO:0022008~neurogenesis	206	11.3187	1.65e-09	NM_001014434, NM_001922, NM_004210, NM_017519, NM_000609, NM_153348, NM_004348, NM_001098635, NM_001122659, NM_001160259, NM_030760, NM_001160258, NM_012152, NM_032638, NM_000514, NM_001135648, NM_013302, NM_001025201, NM_032531, NM_000278, NM_014946, NM_003743, NM_001122819, NM_001145648, NM_001143806, NM_001143805, NM_005348, NM_004093, NM_080872, NM_001165037, NM_152989, NM_001033886, NM_00104…	1519	1382	15185	1.4901	1.42e-05	1.18e-06	3.31e-08
GO:0022008~neurogenesis	206	11.3187	1.65e-09	NM_001014434, NM_001922, NM_004210, NM_017519, NM_000609, NM_153348, NM_004348, NM_001098635, NM_001122659, NM_001160259, NM_030760, NM_001160258, NM_012152, NM_032638, NM_000514, NM_001135648, NM_013302, NM_001025201, NM_032531, NM_000278, NM_014946, NM_003743, NM_001122819, NM_001145648, NM_001143806, NM_001143805, NM_005348, NM_004093, NM_080872, NM_001165037, NM_152989, NM_001033886, NM_00104…	1519	1382	15185	1.4901	1.42e-05	1.18e-06	3.31e-08
GO:0048666~neuron development	148	8.13187	1.92e-09	NM_001014434, NM_004210, NM_017519, NM_000609, NM_153348, NM_001098635, NM_001122659, NM_001160259, NM_001160258, NM_012152, NM_032638, NM_000514, NM_001135648, NM_001025201, NM_013302, NM_032531, NM_000278, NM_014946, NM_001145648, NM_001143806, NM_001143805, NM_004093, NM_080872, NM_001165037, NM_001033886, NM_001042692, NM_003128, NM_023110, NM_001127612, NM_001031702, NM_005076, NM_023108, NM…	1519	912	15185	1.62227	1.66e-05	1.28e-06	3.87e-08
GO:0006928~movement of cell or subcellular component	244	13.4066	3.66e-09	NM_001014434, NM_025069, NM_004210, NM_002290, NM_024729, NM_001130107, NM_002387, NM_001122659, NM_004207, NM_032638, NM_007349, NM_001135648, NM_032531, NM_001008844, NM_201277, NM_005348, NM_080872, NM_000384, NM_007353, NM_001033886, NM_007073, NM_005781, NM_005076, NM_007074, NM_000104, NM_005980, NM_012411, NM_002473, NM_001145160, NM_001145412, NM_001145413, NM_014689, NM_006206, NM_004342…	1519	1718	15185	1.41979	3.16e-05	2.26e-06	7.37e-08
GO:0030182~neuron differentiation	178	9.78022	3.93e-09	NM_001014434, NM_004210, NM_017519, NM_000609, NM_153348, NM_004348, NM_001098635, NM_001122659, NM_001160259, NM_001160258, NM_012152, NM_032638, NM_000514, NM_001135648, NM_032531, NM_001025201, NM_013302, NM_000278, NM_014946, NM_003743, NM_001145648, NM_001143806, NM_001143805, NM_004093, NM_080872, NM_001165037, NM_001033886, NM_001042692, NM_003128, NM_023110, NM_001127612, NM_001031702, NM…	1519	1164	15185	1.52871	3.39e-05	2.26e-06	7.91e-08
GO:0048699~generation of neurons	193	10.6044	5.34e-09	NM_001014434, NM_001922, NM_004210, NM_017519, NM_000609, NM_153348, NM_004348, NM_001098635, NM_001122659, NM_001160259, NM_030760, NM_001160258, NM_012152, NM_032638, NM_000514, NM_001135648, NM_013302, NM_001025201, NM_032531, NM_000278, NM_014946, NM_003743, NM_001145648, NM_001143806, NM_001143805, NM_005348, NM_004093, NM_080872, NM_001165037, NM_152989, NM_001033886, NM_001042692, NM_00312…	1519	1293	15185	1.49216	4.62e-05	2.89e-06	1.08e-07
GO:0048518~positive regulation of biological process	585	32.1429	4.52e-08	NM_005091, NM_001145147, NM_001145146, NM_025069, NM_001922, NM_017519, NM_001145148, NM_004210, NM_001040135, NM_002586, NM_153442, NM_001122659, NM_001130715, NM_005485, NM_001130716, NM_017526, NM_013302, NM_000278, NM_173164, NM_173165, NM_173163, NM_002599, NM_001003931, NM_153453, NM_058216, NM_001136031, NM_080870, NM_001033886, NM_017530, NM_000244, NM_173159, NM_005456, NM_007073, NM_005…	1519	4901	15185	1.19324	0.00039	2.3e-05	9.09e-07
GO:0051239~regulation of multicellular organismal process	329	18.0769	5.43e-08	NM_005091, NM_001145147, NM_001145146, NM_213594, NM_025069, NM_001922, NM_004210, NM_001145148, NM_002290, NM_153348, NM_004348, NM_002387, NM_001122659, NM_005899, NM_030760, NM_001130715, NM_001130716, NM_032638, NM_007349, NM_013302, NM_000278, NM_001008844, NM_000379, NM_005348, NM_080872, NM_001033886, NM_000244, NM_007073, NM_005076, NM_001040158, NM_005360, NM_000104, NM_000101, NM_012411…	1519	2522	15185	1.30409	0.000469	2.61e-05	1.09e-06
GO:0032501~multicellular organismal process	740	40.6593	6.77e-08	NM_005091, NM_001145147, NM_001145146, NM_001014434, NM_025069, NM_001922, NM_017519, NM_001145148, NM_004210, NM_002586, NM_002587, NM_024729, NM_002387, NM_016943, NM_002590, NM_001122659, NM_080860, NM_175867, NM_001130715, NM_001130716, NM_001135648, NM_013302, NM_032531, NM_000278, NM_005086, NM_001008844, NM_080676, NM_002599, NM_153453, NM_058216, NM_080872, NM_080679, NM_000283, NM_001001…	1519	6419	15185	1.15245	0.000585	3.08e-05	1.36e-06
GO:0044700~single organism signaling	660	36.2637	7.08e-08	NM_005091, NM_001145147, NM_001145146, NM_025069, NM_004211, NM_017519, NM_001145148, NM_004210, NM_153442, NM_002587, NM_024729, NM_002387, NM_016943, NM_002590, NM_001122659, NM_017526, NM_001135648, NM_130843, NM_001004303, NM_000278, NM_130842, NM_173164, NM_173165, NM_001008844, NM_173163, NM_002599, NM_139245, NM_207322, NM_080872, NM_181690, NM_000283, NM_001001960, NM_001033886, NM_130854…	1519	5639	15185	1.17004	0.000611	3.06e-05	1.42e-06
GO:0007154~cell communication	666	36.5934	7.4e-08	NM_005091, NM_001145147, NM_001145146, NM_025069, NM_004211, NM_017519, NM_001145148, NM_004210, NM_153442, NM_002587, NM_024729, NM_002387, NM_016943, NM_002590, NM_001122659, NM_017526, NM_001135648, NM_130843, NM_001004303, NM_000278, NM_130842, NM_173164, NM_173165, NM_001008844, NM_173163, NM_002599, NM_001136031, NM_139245, NM_207322, NM_080872, NM_181690, NM_000283, NM_001001960, NM_001033…	1519	5699	15185	1.16824	0.00064	3.05e-05	1.49e-06
GO:0023052~signaling	664	36.4835	8.07e-08	NM_005091, NM_001145147, NM_001145146, NM_025069, NM_004211, NM_017519, NM_001145148, NM_004210, NM_153442, NM_002587, NM_024729, NM_002387, NM_016943, NM_002590, NM_001122659, NM_017526, NM_001135648, NM_130843, NM_001004303, NM_000278, NM_130842, NM_173164, NM_173165, NM_001008844, NM_173163, NM_002599, NM_139245, NM_207322, NM_080872, NM_181690, NM_000283, NM_001001960, NM_001033886, NM_130854…	1519	5683	15185	1.16801	0.000697	3.17e-05	1.62e-06
GO:0007156~homophilic cell adhesion via plasma membrane adhesion molecules	39	2.14286	8.7e-08	NM_033646, NM_003736, NM_002587, NM_002845, NM_018905, NM_018900, NM_001105244, NM_133376, NM_002590, NM_014718, NM_018908, NM_018909, NM_018906, NM_018907, NM_032531, NM_002211, NM_152744, NM_001040429, NM_004361, NM_031849, NM_018915, NM_018916, NM_018910, NM_001144952, NM_018911, NM_018912, NM_004933, NM_018917, NM_022124, NM_018918, NM_018919, NM_031411, NM_018920, NM_018923, NM_018922, NM_02…	1519	153	15185	2.54818	0.000418	0.000418	1.65e-06
GO:0007156~homophilic cell adhesion via plasma membrane adhesion molecules	39	2.14286	1.05e-07	NM_033646, NM_003736, NM_002587, NM_002845, NM_018905, NM_018900, NM_001105244, NM_133376, NM_002590, NM_014718, NM_018908, NM_018909, NM_018906, NM_018907, NM_032531, NM_002211, NM_152744, NM_001040429, NM_004361, NM_031849, NM_018915, NM_018916, NM_018910, NM_001144952, NM_018911, NM_018912, NM_004933, NM_018917, NM_022124, NM_018918, NM_018919, NM_031411, NM_018920, NM_018923, NM_018922, NM_02…	1519	154	15185	2.53163	0.000903	3.93e-05	2.1e-06
GO:0031175~neuron projection development	123	6.75824	1.25e-07	NM_001014434, NM_017519, NM_004210, NM_000609, NM_153348, NM_001098635, NM_001160259, NM_001160258, NM_012152, NM_000514, NM_001025201, NM_013302, NM_032531, NM_001135648, NM_000278, NM_014946, NM_001145648, NM_001143806, NM_001143805, NM_004093, NM_080872, NM_001033886, NM_003128, NM_023110, NM_001127612, NM_001031702, NM_005076, NM_023108, NM_001161707, NM_001143807, NM_023105, NM_021080, NM_02…	1519	769	15185	1.59895	0.00108237	4.51e-05	2.52e-06
GO:0048522~positive regulation of cellular process	533	29.2857	1.35e-07	NM_001145147, NM_001145146, NM_025069, NM_001922, NM_001145148, NM_004210, NM_017519, NM_001040135, NM_002586, NM_153442, NM_001122659, NM_001130715, NM_005485, NM_001130716, NM_017526, NM_013302, NM_000278, NM_173164, NM_173165, NM_173163, NM_001003931, NM_153453, NM_058216, NM_001136031, NM_080870, NM_001033886, NM_017530, NM_000244, NM_173159, NM_005456, NM_007073, NM_005781, NM_005076, NM_007…	1519	4440	15185	1.20006	0.00116339	4.66e-05	2.71e-06
GO:0045595~regulation of cell differentiation	204	11.2088	2.39e-07	NM_005091, NM_025069, NM_004915, NM_001922, NM_004210, NM_000609, NM_001077401, NM_153348, NM_004348, NM_001098635, NM_001122659, NM_006738, NM_001160259, NM_030760, NM_001160258, NM_005899, NM_001168325, NM_012152, NM_032638, NM_000514, NM_013302, NM_001025201, NM_000278, NM_000618, NM_003743, NM_000379, NM_001143806, NM_001168278, NM_013402, NM_001143805, NM_004093, NM_080872, NM_000384, NM_152…	1519	1453	15185	1.40353	0.00205928	7.93e-05	4.8e-06
GO:0048812~neuron projection morphogenesis	88	4.83516	3.29e-07	NM_000165, NM_001014434, NM_001006943, NM_138559, NM_014624, NM_000609, NM_152447, NM_001143976, NM_175613, NM_002845, NM_001171624, NM_001171625, NM_001171622, NM_001171623, NM_153348, NM_015090, NM_002848, NM_012152, NM_006272, NM_013302, NM_032531, NM_001025201, NM_000278, NM_002211, NM_020526, NM_014946, NM_175607, NM_001143806, NM_001143805, NM_004093, NM_182690, NM_198309, NM_080872, NM_138…	1519	508	15185	1.73171	0.00283973	0.000105	6.62e-06
GO:0032879~regulation of localization	304	16.7033	3.55e-07	NM_001145147, NM_001145146, NM_025069, NM_144707, NM_004915, NM_001145148, NM_005338, NM_153442, NM_002290, NM_002387, NM_001122659, NM_032638, NM_017526, NM_001135648, NM_013302, NM_198517, NM_001008844, NM_173162, NM_002599, NM_201277, NM_001145648, NM_001040429, NM_005348, NM_207322, NM_080872, NM_080870, NM_000384, NM_007353, NM_001033886, NM_007073, NM_005781, NM_007074, NM_001040158, NM_000…	1519	2343	15185	1.29705	0.00306226	0.00011	7.14e-06
GO:0032879~regulation of localization	304	16.7033	3.55e-07	NM_001145147, NM_001145146, NM_025069, NM_144707, NM_004915, NM_001145148, NM_005338, NM_153442, NM_002290, NM_002387, NM_001122659, NM_032638, NM_017526, NM_001135648, NM_013302, NM_198517, NM_001008844, NM_173162, NM_002599, NM_201277, NM_001145648, NM_001040429, NM_005348, NM_207322, NM_080872, NM_080870, NM_000384, NM_007353, NM_001033886, NM_007073, NM_005781, NM_007074, NM_001040158, NM_000…	1519	2343	15185	1.29705	0.00306226	0.00011	7.14e-06
GO:0051240~positive regulation of multicellular organismal process	192	10.5495	4.36e-07	NM_025069, NM_001922, NM_004210, NM_000609, NM_000602, NM_153348, NM_001077401, NM_004348, NM_001098635, NM_001122659, NM_003152, NM_006092, NM_001160259, NM_001160258, NM_001168325, NM_012152, NM_003153, NM_032638, NM_001128204, NM_001128205, NM_007349, NM_001128206, NM_000514, NM_013302, NM_000278, NM_000618, NM_003743, NM_053001, NM_001143806, NM_001168278, NM_005348, NM_001143805, NM_004093, …	1519	1362	15185	1.40923	0.00376139	0.00013	8.78e-06
GO:0009719~response to endogenous stimulus	205	11.2637	4.56e-07	NM_001145147, NM_001145146, NM_025069, NM_032315, NM_004915, NM_004210, NM_001145148, NM_000609, NM_203472, NM_001165975, NM_001077401, NM_004348, NM_003638, NM_003152, NM_006092, NM_001160259, NM_001160258, NM_001136191, NM_001128204, NM_001128205, NM_017526, NM_001128206, NM_001135648, NM_013302, NM_021991, NM_000278, NM_002667, NM_003743, NM_002599, NM_013402, NM_005348, NM_198392, NM_003243, …	1519	1474	15185	1.39032	0.0039322	0.000131	9.18e-06
GO:0040011~locomotion	203	11.1538	5.04e-07	NM_001014434, NM_025069, NM_004210, NM_000609, NM_017707, NM_147147, NM_000602, NM_002290, NM_001077710, NM_005201, NM_001077401, NM_002387, NM_002872, NM_001122659, NM_003152, NM_004207, NM_001128204, NM_032638, NM_001128205, NM_001128206, NM_021069, NM_007349, NM_000514, NM_001135648, NM_021991, NM_001025201, NM_032531, NM_000618, NM_001130834, NM_201277, NM_001143806, NM_005348, NM_001143805, …	1519	1459	15185	1.39091	0.00435001	0.000141	1.02e-05
GO:0000904~cell morphogenesis involved in differentiation	113	6.20879	5.23e-07	NM_001014434, NM_025069, NM_000609, NM_147147, NM_001077401, NM_153348, NM_003638, NM_012152, NM_000514, NM_001025201, NM_013302, NM_000278, NM_014946, NM_001143806, NM_001143805, NM_001168278, NM_004093, NM_003243, NM_080872, NM_001033886, NM_001042692, NM_003128, NM_001127612, NM_001031702, NM_007073, NM_005076, NM_001143807, NM_021080, NM_002473, NM_012174, NM_001093767, NM_001168344, NM_00732…	1519	709	15185	1.59327	0.00451166	0.000141	1.05e-05
GO:0051094~positive regulation of developmental process	153	8.40659	5.31e-07	NM_025069, NM_001922, NM_004210, NM_000609, NM_000602, NM_153348, NM_001077401, NM_004348, NM_001098635, NM_001160259, NM_001160258, NM_001168325, NM_012152, NM_003153, NM_032638, NM_007349, NM_000514, NM_013302, NM_000278, NM_000618, NM_003743, NM_053001, NM_001143806, NM_001168278, NM_001143805, NM_004093, NM_003243, NM_152989, NM_001033886, NM_023110, NM_001129889, NM_001127612, NM_001040158, …	1519	1036	15185	1.47635	0.00457908	0.000139	1.07e-05
GO:0007155~cell adhesion	220	12.0879	5.62e-07	NM_025069, NM_032459, NM_000609, NM_003736, NM_147147, NM_000602, NM_002290, NM_002587, NM_018905, NM_005201, NM_001077401, NM_004348, NM_018900, NM_005480, NM_002590, NM_002872, NM_003638, NM_021259, NM_018908, NM_001168325, NM_018909, NM_018906, NM_003153, NM_018907, NM_021069, NM_001135648, NM_032531, NM_021991, NM_000518, NM_005086, NM_001008844, NM_000618, NM_001040429, NM_201277, NM_006329,…	1519	1609	15185	1.36686	0.00484801	0.000143	1.13e-05
GO:0030030~cell projection organization	176	9.67033	5.72e-07	NM_001014434, NM_213594, NM_144707, NM_004210, NM_017519, NM_000609, NM_017802, NM_001077710, NM_001165977, NM_001165978, NM_153348, NM_001098635, NM_080860, NM_002872, NM_003638, NM_001160259, NM_001160258, NM_012152, NM_152388, NM_001113361, NM_000514, NM_001135648, NM_198517, NM_032531, NM_001025201, NM_013302, NM_000278, NM_206996, NM_014946, NM_001122819, NM_001145648, NM_003551, NM_00114380…	1519	1231	15185	1.42926	0.00493062	0.000141	1.15e-05
GO:0032989~cellular component morphogenesis	178	9.78022	5.76e-07	NM_001014434, NM_025069, NM_213594, NM_004210, NM_000609, NM_017802, NM_147147, NM_024729, NM_153348, NM_001077401, NM_080860, NM_003638, NM_001077186, NM_014553, NM_012152, NM_152388, NM_001113361, NM_000514, NM_198517, NM_032531, NM_001025201, NM_013302, NM_000278, NM_206996, NM_001127605, NM_014946, NM_003551, NM_001143806, NM_001168278, NM_001143805, NM_004093, NM_003243, NM_080872, NM_007353…	1519	1248	15185	1.42581	0.00496962	0.000138	1.16e-05
GO:0022610~biological adhesion	220	12.0879	6.64e-07	NM_025069, NM_032459, NM_000609, NM_003736, NM_147147, NM_000602, NM_002290, NM_002587, NM_018905, NM_005201, NM_001077401, NM_004348, NM_018900, NM_005480, NM_002590, NM_002872, NM_003638, NM_021259, NM_018908, NM_001168325, NM_018909, NM_018906, NM_003153, NM_018907, NM_021069, NM_001135648, NM_032531, NM_021991, NM_000518, NM_005086, NM_001008844, NM_000618, NM_001040429, NM_201277, NM_006329,…	1519	1614	15185	1.36262	0.00572363	0.000155	1.34e-05
GO:0050793~regulation of developmental process	266	14.6154	7.23e-07	NM_005091, NM_213594, NM_025069, NM_001922, NM_004210, NM_002290, NM_024729, NM_153348, NM_004348, NM_001122659, NM_005899, NM_030760, NM_001130715, NM_001130716, NM_032638, NM_007349, NM_198517, NM_013302, NM_000278, NM_000379, NM_080872, NM_007353, NM_001033886, NM_007073, NM_005076, NM_001040158, NM_007074, NM_005360, NM_000104, NM_002473, NM_001093767, NM_001145412, NM_001145413, NM_007327, N…	1519	2020	15185	1.3164	0.00622672	0.000164	1.45e-05
GO:0048858~cell projection morphogenesis	117	6.42857	9.04e-07	NM_001014434, NM_213594, NM_004210, NM_000609, NM_017802, NM_153348, NM_080860, NM_012152, NM_152388, NM_013302, NM_001025201, NM_032531, NM_206996, NM_000278, NM_014946, NM_003551, NM_001143806, NM_001143805, NM_001168278, NM_004093, NM_080872, NM_001033886, NM_001042692, NM_003128, NM_001127612, NM_001031702, NM_001080447, NM_005076, NM_001161707, NM_001143807, NM_021080, NM_012174, NM_00116834…	1519	749	15185	1.56157	0.00777984	0.0002	1.82e-05
GO:0032990~cell part morphogenesis	119	6.53846	1.01e-06	NM_001014434, NM_213594, NM_004210, NM_000609, NM_017802, NM_024729, NM_153348, NM_080860, NM_001077186, NM_012152, NM_152388, NM_013302, NM_001025201, NM_032531, NM_206996, NM_000278, NM_014946, NM_003551, NM_001143806, NM_001143805, NM_001168278, NM_004093, NM_080872, NM_001033886, NM_001042692, NM_003128, NM_001127612, NM_001031702, NM_001080447, NM_005076, NM_001161707, NM_001143807, NM_02108…	1519	767	15185	1.55099	0.00870332	0.000219	2.04e-05
GO:0030029~actin filament-based process	103	5.65934	1.05e-06	NM_032451, NM_001040135, NM_000609, NM_017707, NM_024729, NM_002872, NM_006738, NM_001077186, NM_021069, NM_021991, NM_002667, NM_001008844, NM_201277, NM_001104631, NM_001033886, NM_032432, NM_023083, NM_003128, NM_023085, NM_007074, NM_019105, NM_001042517, NM_006072, NM_002473, NM_001145160, NM_003130, NM_006206, NM_001130955, NM_182966, NM_001031714, NM_144596, NM_032122, NM_003319, NM_032714…	1519	639	15185	1.61136	0.00906118	0.000222	2.12e-05
GO:0098609~cell-cell adhesion	159	8.73626	1.3e-06	NM_025069, NM_000609, NM_147147, NM_003736, NM_002587, NM_018905, NM_018900, NM_004348, NM_002590, NM_003638, NM_002872, NM_018908, NM_018909, NM_018906, NM_003153, NM_018907, NM_021991, NM_032531, NM_000518, NM_001008844, NM_000618, NM_001040429, NM_201277, NM_004361, NM_005204, NM_004093, NM_018915, NM_018916, NM_080872, NM_145714, NM_018910, NM_018911, NM_018912, NM_018917, NM_018918, NM_00103…	1519	1102	15185	1.44236	0.0111292	0.000266	2.61e-05
GO:0051270~regulation of cellular component movement	118	6.48352	1.34e-06	NM_025069, NM_000609, NM_000602, NM_002290, NM_001077710, NM_001077401, NM_002387, NM_002872, NM_003152, NM_001128204, NM_001128205, NM_001128206, NM_001135648, NM_021991, NM_002667, NM_001008844, NM_000618, NM_001130834, NM_201277, NM_003243, NM_080872, NM_007353, NM_001104631, NM_001033886, NM_001042692, NM_023110, NM_001127612, NM_001031702, NM_007074, NM_000104, NM_023108, NM_023105, NM_01241…	1519	763	15185	1.54602	0.0115002	0.000269	2.69e-05
GO:0000902~cell morphogenesis	166	9.12088	2.04e-06	NM_001014434, NM_025069, NM_213594, NM_004210, NM_000609, NM_017802, NM_147147, NM_024729, NM_153348, NM_001077401, NM_080860, NM_003638, NM_014553, NM_001077186, NM_012152, NM_152388, NM_001113361, NM_000514, NM_198517, NM_001025201, NM_013302, NM_032531, NM_000278, NM_206996, NM_001127605, NM_014946, NM_003551, NM_001143806, NM_001168278, NM_001143805, NM_004093, NM_003243, NM_080872, NM_007353…	1519	1170	15185	1.41834	0.0174739	0.000401	4.11e-05
GO:0007167~enzyme linked receptor protein signaling pathway	135	7.41758	2.38e-06	NM_025069, NM_004210, NM_005338, NM_001077401, NM_004348, NM_003638, NM_003152, NM_001128204, NM_017526, NM_001128205, NM_001128206, NM_001135648, NM_001025201, NM_000618, NM_000379, NM_003236, NM_001143806, NM_001168278, NM_001143805, NM_005348, NM_004093, NM_139245, NM_003243, NM_003338, NM_000244, NM_003128, NM_023110, NM_000627, NM_005781, NM_004712, NM_016441, NM_000101, NM_023108, NM_001143…	1519	912	15185	1.47978	0.0203224	0.000456	4.78e-05
GO:0006936~muscle contraction	60	3.2967	2.77e-06	NM_000165, NM_003149, NM_174934, NM_000801, NM_002203, NM_018848, NM_133432, NM_024729, NM_133437, NM_001122659, NM_133337, NM_001077186, NM_004770, NM_001128204, NM_000910, NM_001128205, NM_001128206, NM_000514, NM_021991, NM_000916, NM_207396, NM_005086, NM_002667, NM_001008844, NM_002213, NM_001167945, NM_001127670, NM_054014, NM_001166176, NM_005348, NM_000719, NM_004298, NM_001166175, NM_033…	1519	321	15185	1.86854	0.02366	0.00052	5.58e-05
GO:0007268~chemical synaptic transmission	93	5.10989	3.48e-06	NM_000806, NM_001114183, NM_001144382, NM_000905, NM_004211, NM_199292, NM_000903, NM_017519, NM_004210, NM_199293, NM_152447, NM_175613, NM_020732, NM_016083, NM_002590, NM_001098635, NM_024557, NM_001160259, NM_139316, NM_001160258, NM_012152, NM_002847, NM_000910, NM_000815, NM_006272, NM_000817, NM_000514, NM_015321, NM_130843, NM_000916, NM_130842, NM_000810, NM_001167945, NM_175607, NM_0011…	1519	576	15185	1.61405	0.0296648	0.000641	7.01e-05
GO:0098916~anterograde trans-synaptic signaling	93	5.10989	3.48e-06	NM_000806, NM_001114183, NM_001144382, NM_000905, NM_004211, NM_199292, NM_000903, NM_017519, NM_004210, NM_199293, NM_152447, NM_175613, NM_020732, NM_016083, NM_002590, NM_001098635, NM_024557, NM_001160259, NM_139316, NM_001160258, NM_012152, NM_002847, NM_000910, NM_000815, NM_006272, NM_000817, NM_000514, NM_015321, NM_130843, NM_000916, NM_130842, NM_000810, NM_001167945, NM_175607, NM_0011…	1519	576	15185	1.61405	0.0296648	0.000641	7.01e-05
GO:0099536~synaptic signaling	93	5.10989	3.48e-06	NM_000806, NM_001114183, NM_001144382, NM_000905, NM_004211, NM_199292, NM_000903, NM_017519, NM_004210, NM_199293, NM_152447, NM_175613, NM_020732, NM_016083, NM_002590, NM_001098635, NM_024557, NM_001160259, NM_139316, NM_001160258, NM_012152, NM_002847, NM_000910, NM_000815, NM_006272, NM_000817, NM_000514, NM_015321, NM_130843, NM_000916, NM_130842, NM_000810, NM_001167945, NM_175607, NM_0011…	1519	576	15185	1.61405	0.0296648	0.000641	7.01e-05
GO:0099537~trans-synaptic signaling	93	5.10989	3.48e-06	NM_000806, NM_001114183, NM_001144382, NM_000905, NM_004211, NM_199292, NM_000903, NM_017519, NM_004210, NM_199293, NM_152447, NM_175613, NM_020732, NM_016083, NM_002590, NM_001098635, NM_024557, NM_001160259, NM_139316, NM_001160258, NM_012152, NM_002847, NM_000910, NM_000815, NM_006272, NM_000817, NM_000514, NM_015321, NM_130843, NM_000916, NM_130842, NM_000810, NM_001167945, NM_175607, NM_0011…	1519	576	15185	1.61405	0.0296648	0.000641	7.01e-05
GO:0035637~multicellular organismal signaling	34	1.86813	4.11e-06	NM_000165, NM_025213, NM_001129829, NM_153485, NM_174934, NM_152219, NM_152296, NM_172364, NM_001005389, NM_002203, NM_001129827, NM_003285, NM_024729, NM_172115, NM_172114, NM_001005388, NM_015090, NM_001077186, NM_000844, NM_020977, NM_014191, NM_021991, NM_001145809, NM_207396, NM_002667, NM_001008844, NM_001167945, NM_020971, NM_001127670, NM_000719, NM_004298, NM_172129, NM_172128, NM_004974…	1519	144	15185	2.36033	0.0348765	0.000739	8.27e-05
GO:0006468~protein phosphorylation	231	12.6923	4.36e-06	NM_001144382, NM_144707, NM_004210, NM_001122659, NM_005899, NM_198517, NM_013302, NM_001004023, NM_001146255, NM_000379, NM_001145648, NM_005348, NM_139245, NM_181690, NM_024876, NM_001146254, NM_000244, NM_005456, NM_005781, NM_001040158, NM_012411, NM_006206, NM_007327, NM_001200, NM_000115, NM_001080395, NM_001203, NM_002350, NM_001759, NM_007200, NM_000230, NM_001112, NM_001115, NM_001033756…	1519	1752	15185	1.31806	0.0369685	0.000768	8.77e-05
GO:0003012~muscle system process	69	3.79121	4.49e-06	NM_000165, NM_003149, NM_174934, NM_000801, NM_002203, NM_018848, NM_133432, NM_024729, NM_133437, NM_001122659, NM_133337, NM_006738, NM_001077186, NM_004770, NM_001128204, NM_000910, NM_001128205, NM_021069, NM_001128206, NM_000514, NM_021991, NM_000916, NM_207396, NM_005086, NM_002667, NM_001008844, NM_000618, NM_002213, NM_001167945, NM_001127670, NM_054014, NM_001166176, NM_005348, NM_000719…	1519	393	15185	1.75515	0.0380255	0.000775	9.03e-05
GO:0048667~cell morphogenesis involved in neuron differentiation	78	4.28571	4.92e-06	NM_001014434, NM_001006943, NM_138559, NM_014624, NM_000609, NM_152447, NM_175613, NM_002845, NM_001171624, NM_001171625, NM_001171622, NM_001171623, NM_153348, NM_015090, NM_002848, NM_012152, NM_006272, NM_013302, NM_001025201, NM_000278, NM_002211, NM_020526, NM_014946, NM_175607, NM_001143806, NM_001143805, NM_004093, NM_182690, NM_198309, NM_080872, NM_138576, NM_001024660, NM_002220, NM_199…	1519	463	15185	1.68411	0.0416549	0.000834	9.91e-05
GO:0065009~regulation of molecular function	333	18.2967	4.98e-06	NM_001145147, NM_001144382, NM_001145146, NM_144707, NM_004210, NM_001145148, NM_005338, NM_001007232, NM_001129731, NM_080869, NM_001122659, NM_175867, NM_001135191, NM_198517, NM_130843, NM_000278, NM_130842, NM_001146255, NM_000379, NM_001145648, NM_005348, NM_001146254, NM_000244, NM_005456, NM_007073, NM_001135188, NM_005781, NM_001135187, NM_001040158, NM_016441, NM_001135189, NM_000104, NM…	1519	2679	15185	1.24259	0.0420872	0.000827	0.000100135
GO:0065009~regulation of molecular function	333	18.2967	4.98e-06	NM_001145147, NM_001144382, NM_001145146, NM_144707, NM_004210, NM_001145148, NM_005338, NM_001007232, NM_001129731, NM_080869, NM_001122659, NM_175867, NM_001135191, NM_198517, NM_130843, NM_000278, NM_130842, NM_001146255, NM_000379, NM_001145648, NM_005348, NM_001146254, NM_000244, NM_005456, NM_007073, NM_001135188, NM_005781, NM_001135187, NM_001040158, NM_016441, NM_001135189, NM_000104, NM…	1519	2679	15185	1.24259	0.0420872	0.000827	0.000100135
GO:0007409~axonogenesis	68	3.73626	5.16e-06	NM_001014434, NM_001006943, NM_138559, NM_014624, NM_000609, NM_152447, NM_175613, NM_002845, NM_001171624, NM_001171625, NM_001171622, NM_001171623, NM_015090, NM_002848, NM_012152, NM_006272, NM_001025201, NM_000278, NM_002211, NM_020526, NM_014946, NM_175607, NM_001143806, NM_001143805, NM_004093, NM_182690, NM_198309, NM_080872, NM_138576, NM_199436, NM_001033886, NM_030671, NM_003128, NM_030…	1519	387	15185	1.75653	0.0435732	0.00084	0.00010375
GO:0008283~cell proliferation	229	12.5824	5.85e-06	NM_001014434, NM_001144382, NM_025069, NM_001922, NM_004210, NM_153348, NM_002387, NM_004348, NM_001122659, NM_001130715, NM_001130716, NM_032638, NM_001135648, NM_000278, NM_000379, NM_001145648, NM_001033886, NM_000244, NM_007074, NM_000104, NM_000101, NM_012411, NM_025099, NM_006206, NM_001200, NM_004334, NM_000115, NM_001203, NM_001400, NM_001042425, NM_002350, NM_133509, NM_017617, NM_001759…	1519	1742	15185	1.31415	0.0492762	0.000935	0.000117677
GO:0097485~neuron projection guidance	44	2.41758	6.24e-06	NM_001014434, NM_025213, NM_015656, NM_001006943, NM_001005389, NM_003392, NM_000609, NM_175613, NM_003285, NM_002845, NM_001171624, NM_001171625, NM_001171622, NM_201414, NM_001171623, NM_001105244, NM_201413, NM_001005388, NM_001033756, NM_001079823, NM_015090, NM_002848, NM_001822, NM_001005862, NM_004441, NM_001025201, NM_020526, NM_175607, NM_020971, NM_001143806, NM_001143805, NM_133369, NM…	1519	214	15185	2.0554	0.0525213	0.00098	0.000125639
GO:0045597~positive regulation of cell differentiation	120	6.59341	7.22e-06	NM_025069, NM_001922, NM_004210, NM_000609, NM_001077401, NM_153348, NM_004348, NM_001098635, NM_001160259, NM_001160258, NM_001168325, NM_012152, NM_032638, NM_000514, NM_013302, NM_000278, NM_000618, NM_003743, NM_001143806, NM_001143805, NM_001168278, NM_004093, NM_000384, NM_152989, NM_001033886, NM_023110, NM_001129889, NM_001127612, NM_001040158, NM_006898, NM_000965, NM_023108, NM_019102, …	1519	806	15185	1.48834	0.0604814	0.00111344	0.000145285
GO:0048870~cell motility	174	9.56044	8.5e-06	NM_025069, NM_004210, NM_000609, NM_017707, NM_000602, NM_147147, NM_002290, NM_001077710, NM_001077401, NM_002387, NM_002872, NM_001122659, NM_003152, NM_004207, NM_032638, NM_001128204, NM_001128205, NM_007349, NM_001128206, NM_021069, NM_000514, NM_001135648, NM_032531, NM_021991, NM_000618, NM_001130834, NM_201277, NM_005348, NM_004093, NM_003243, NM_080872, NM_000384, NM_007353, NM_001104631…	1519	1268	15185	1.37179	0.0707845	0.00128715	0.000170961
GO:0051674~localization of cell	174	9.56044	8.5e-06	NM_025069, NM_004210, NM_000609, NM_017707, NM_000602, NM_147147, NM_002290, NM_001077710, NM_001077401, NM_002387, NM_002872, NM_001122659, NM_003152, NM_004207, NM_032638, NM_001128204, NM_001128205, NM_007349, NM_001128206, NM_021069, NM_000514, NM_001135648, NM_032531, NM_021991, NM_000618, NM_001130834, NM_201277, NM_005348, NM_004093, NM_003243, NM_080872, NM_000384, NM_007353, NM_001104631…	1519	1268	15185	1.37179	0.0707845	0.00128715	0.000170961
GO:0061564~axon development	71	3.9011	8.78e-06	NM_001014434, NM_001006943, NM_138559, NM_014624, NM_000609, NM_152447, NM_175613, NM_002845, NM_001171624, NM_001171625, NM_016083, NM_001171622, NM_001171623, NM_015090, NM_001160259, NM_001160258, NM_002848, NM_012152, NM_006272, NM_001025201, NM_000278, NM_002211, NM_020526, NM_014946, NM_175607, NM_001143806, NM_001143805, NM_004093, NM_182690, NM_198309, NM_080872, NM_138576, NM_199436, NM_…	1519	416	15185	1.70617	0.0730534	0.00130706	0.000176654
GO:0023051~regulation of signaling	355	19.5055	9.34e-06	NM_001145147, NM_001144382, NM_001145146, NM_213594, NM_025069, NM_004210, NM_001145148, NM_005338, NM_001129731, NM_004348, NM_002387, NM_005899, NM_032638, NM_017526, NM_198517, NM_001146255, NM_000379, NM_001145648, NM_001040429, NM_001146254, NM_007353, NM_000283, NM_001033886, NM_000244, NM_005456, NM_005358, NM_007073, NM_005076, NM_000104, NM_000101, NM_012411, NM_001145412, NM_001145413, …	1519	2901	15185	1.22331	0.0775288	0.00136685	0.000187923
GO:0023051~regulation of signaling	355	19.5055	9.34e-06	NM_001145147, NM_001144382, NM_001145146, NM_213594, NM_025069, NM_004210, NM_001145148, NM_005338, NM_001129731, NM_004348, NM_002387, NM_005899, NM_032638, NM_017526, NM_198517, NM_001146255, NM_000379, NM_001145648, NM_001040429, NM_001146254, NM_007353, NM_000283, NM_001033886, NM_000244, NM_005456, NM_005358, NM_007073, NM_005076, NM_000104, NM_000101, NM_012411, NM_001145412, NM_001145413, …	1519	2901	15185	1.22331	0.0775288	0.00136685	0.000187923
GO:0023051~regulation of signaling	355	19.5055	9.34e-06	NM_001145147, NM_001144382, NM_001145146, NM_213594, NM_025069, NM_004210, NM_001145148, NM_005338, NM_001129731, NM_004348, NM_002387, NM_005899, NM_032638, NM_017526, NM_198517, NM_001146255, NM_000379, NM_001145648, NM_001040429, NM_001146254, NM_007353, NM_000283, NM_001033886, NM_000244, NM_005456, NM_005358, NM_007073, NM_005076, NM_000104, NM_000101, NM_012411, NM_001145412, NM_001145413, …	1519	2901	15185	1.22331	0.0775288	0.00136685	0.000187923
GO:0016477~cell migration	158	8.68132	1.06e-05	NM_025069, NM_000609, NM_017707, NM_000602, NM_147147, NM_001077710, NM_001077401, NM_002387, NM_002872, NM_001122659, NM_003152, NM_004207, NM_032638, NM_001128204, NM_001128205, NM_007349, NM_001128206, NM_021069, NM_000514, NM_001135648, NM_032531, NM_021991, NM_000618, NM_201277, NM_005348, NM_004093, NM_003243, NM_080872, NM_000384, NM_007353, NM_001104631, NM_001033886, NM_001042692, NM_023…	1519	1134	15185	1.39284	0.0874196	0.00152349	0.000213024
GO:0009888~tissue development	219	12.033	1.15e-05	NM_025069, NM_001922, NM_004210, NM_024729, NM_153348, NM_004348, NM_002590, NM_001122659, NM_005899, NM_032638, NM_007349, NM_000278, NM_001008844, NM_000379, NM_002599, NM_153453, NM_080679, NM_000244, NM_007073, NM_001040158, NM_005360, NM_000104, NM_025099, NM_006206, NM_205860, NM_002283, NM_001200, NM_000115, NM_001203, NM_001400, NM_000260, NM_002480, NM_001042425, NM_173050, NM_001145425,…	1519	1670	15185	1.31095	0.0942669	0.00162181	0.00023056
GO:0048513~animal organ development	359	19.7253	1.19e-05	NM_005091, NM_001144382, NM_001014434, NM_015599, NM_213594, NM_025069, NM_001922, NM_004210, NM_024729, NM_153348, NM_004348, NM_001122659, NM_005899, NM_032638, NM_007349, NM_032531, NM_000278, NM_001004023, NM_001008844, NM_080676, NM_002599, NM_201277, NM_000379, NM_153453, NM_024876, NM_080679, NM_000283, NM_001165037, NM_001033886, NM_000244, NM_007073, NM_005076, NM_001040158, NM_021599, N…	1519	2945	15185	1.21861	0.0974245	0.00165191	0.000238692
GO:0040012~regulation of locomotion	110	6.04396	1.22e-05	NM_025069, NM_000609, NM_147147, NM_000602, NM_002290, NM_001077710, NM_001077401, NM_002387, NM_002872, NM_003152, NM_001128204, NM_001128205, NM_001128206, NM_001135648, NM_000618, NM_001130834, NM_201277, NM_004093, NM_080872, NM_007353, NM_001033886, NM_001042692, NM_023110, NM_001127612, NM_001031702, NM_007073, NM_007074, NM_000104, NM_023108, NM_023105, NM_012411, NM_023107, NM_000963, NM_…	1519	732	15185	1.50224	0.100004	0.00167106	0.000245355
GO:0007411~axon guidance	43	2.36264	1.29e-05	NM_001014434, NM_025213, NM_015656, NM_001006943, NM_001005389, NM_000609, NM_003392, NM_175613, NM_003285, NM_002845, NM_001171624, NM_001171625, NM_001171622, NM_201414, NM_001171623, NM_001105244, NM_201413, NM_001005388, NM_001033756, NM_001079823, NM_015090, NM_002848, NM_001822, NM_001005862, NM_004441, NM_001025201, NM_020526, NM_175607, NM_020971, NM_001143806, NM_001143805, NM_133369, NM…	1519	213	15185	2.01811	0.105766	0.00174515	0.000260309
GO:0007610~behavior	85	4.67033	1.43e-05	NM_000165, NM_001114183, NM_002303, NM_000905, NM_020530, NM_199292, NM_199293, NM_172160, NM_000609, NM_147223, NM_018848, NM_198990, NM_002205, NM_024729, NM_016083, NM_001122838, NM_001165975, NM_001098635, NM_003638, NM_014213, NM_001160259, NM_001160258, NM_001077186, NM_000910, NM_006272, NM_000514, NM_032531, NM_015321, NM_000916, NM_002211, NM_053004, NM_000810, NM_003743, NM_001145648, N…	1519	532	15185	1.59722	0.116386	0.00190181	0.000288127
GO:0098742~cell-cell adhesion via plasma-membrane adhesion molecules	44	2.41758	1.45e-05	NM_001307, NM_033646, NM_003736, NM_002205, NM_002587, NM_002845, NM_018905, NM_018900, NM_001105244, NM_002590, NM_133376, NM_014718, NM_018908, NM_018909, NM_018906, NM_018907, NM_032531, NM_002211, NM_152744, NM_001040429, NM_004361, NM_031849, NM_018915, NM_018916, NM_018910, NM_018911, NM_001144952, NM_018912, NM_004933, NM_018917, NM_022124, NM_018918, NM_018919, NM_031411, NM_018920, NM_01…	1519	221	15185	1.99029	0.117598	0.00189378	0.000291323
GO:0035107~appendage morphogenesis	33	1.81319	1.52e-05	NM_000165, NM_017617, NM_001129829, NM_018413, NM_001129827, NM_003392, NM_002586, NM_198956, NM_001114979, NM_004348, NM_014714, NM_014213, NM_002449, NM_001114978, NM_001142462, NM_053001, NM_000719, NM_023111, NM_007353, NM_001042692, NM_002653, NM_001426, NM_023110, NM_001024630, NM_001167623, NM_152470, NM_001167624, NM_001129843, NM_001129844, NM_001167625, NM_001129846, NM_153715, NM_00552…	1519	146	15185	2.25953	0.12313	0.00195922	0.000305964
GO:0035108~limb morphogenesis	33	1.81319	1.52e-05	NM_000165, NM_017617, NM_001129829, NM_018413, NM_001129827, NM_003392, NM_002586, NM_198956, NM_001114979, NM_004348, NM_014714, NM_014213, NM_002449, NM_001114978, NM_001142462, NM_053001, NM_000719, NM_023111, NM_007353, NM_001042692, NM_002653, NM_001426, NM_023110, NM_001024630, NM_001167623, NM_152470, NM_001167624, NM_001129843, NM_001129844, NM_001167625, NM_001129846, NM_153715, NM_00552…	1519	146	15185	2.25953	0.12313	0.00195922	0.000305964
GO:0006937~regulation of muscle contraction	33	1.81319	1.52e-05	NM_001129829, NM_002203, NM_001129827, NM_172115, NM_172114, NM_024940, NM_000743, NM_004770, NM_000910, NM_001006628, NM_001006627, NM_001006626, NM_020977, NM_021991, NM_000916, NM_207396, NM_001081560, NM_002667, NM_001081562, NM_001008844, NM_001081563, NM_000719, NM_005348, NM_001166176, NM_001006629, NM_172129, NM_001166175, NM_002052, NM_004832, NM_172128, NM_172127, NM_033437, NM_00110463…	1519	146	15185	2.25953	0.12313	0.00195922	0.000305964
GO:0030036~actin cytoskeleton organization	84	4.61538	1.54e-05	NM_020441, NM_032451, NM_020445, NM_019034, NM_014629, NM_000609, NM_001040135, NM_017707, NM_022489, NM_018848, NM_133432, NM_024729, NM_016081, NM_001112718, NM_001143778, NM_001112717, NM_133437, NM_001112719, NM_002872, NM_006738, NM_001077186, NM_021069, NM_002211, NM_002213, NM_201277, NM_001166176, NM_001166175, NM_198309, NM_147204, NM_002220, NM_015318, NM_001033886, NM_032432, NM_183040…	1519	525	15185	1.59947	0.124471	0.00195291	0.000309528
GO:0050896~response to stimulus	835	45.8791	1.58e-05	NM_001145147, NM_001014433, NM_005091, NM_001145146, NM_001014434, NM_025069, NM_001145148, NM_004210, NM_153442, NM_080869, NM_002387, NM_016943, NM_001122659, NM_001130715, NM_005485, NM_001130716, NM_017526, NM_138806, NM_001135648, NM_013302, NM_130843, NM_001004303, NM_000278, NM_130842, NM_173164, NM_001008844, NM_173165, NM_080676, NM_173163, NM_002599, NM_001003931, NM_006329, NM_058216, …	1519	7569	15185	1.10282	0.12797	0.00198255	0.000318851
GO:0010628~positive regulation of gene expression	210	11.5385	1.72e-05	NM_213594, NM_017519, NM_002586, NM_016655, NM_016654, NM_004348, NM_001130715, NM_001130716, NM_032638, NM_007349, NM_000278, NM_173164, NM_173165, NM_173163, NM_201277, NM_153453, NM_000384, NM_017530, NM_000244, NM_173159, NM_005076, NM_001040158, NM_005360, NM_012411, NM_002473, NM_001145412, NM_001145413, NM_205860, NM_007327, NM_001200, NM_006312, NM_001203, NM_001400, NM_002480, NM_0010424…	1519	1599	15185	1.31289	0.1379	0.00211752	0.000345513
GO:2000026~regulation of multicellular organismal development	213	11.7033	1.78e-05	NM_005091, NM_025069, NM_213594, NM_001922, NM_004210, NM_002290, NM_153348, NM_004348, NM_001122659, NM_005899, NM_030760, NM_032638, NM_007349, NM_013302, NM_000278, NM_000379, NM_080872, NM_001033886, NM_005076, NM_001040158, NM_005360, NM_000104, NM_001093767, NM_001145412, NM_001145413, NM_007327, NM_001703, NM_001200, NM_000115, NM_001203, NM_001400, NM_002480, NM_001042425, NM_001145425, N…	1519	1627	15185	1.30873	0.142941	0.00217015	0.000359166
GO:0045596~negative regulation of cell differentiation	92	5.05495	1.88e-05	NM_005091, NM_001259, NM_004915, NM_138559, NM_175613, NM_001114979, NM_001077401, NM_004962, NM_001098635, NM_001122659, NM_005899, NM_002848, NM_001114978, NM_032638, NM_006272, NM_002211, NM_000618, NM_175607, NM_000379, NM_001143806, NM_001166176, NM_001168278, NM_001143805, NM_001166175, NM_005929, NM_147204, NM_000567, NM_024409, NM_018715, NM_207629, NM_207628, NM_207627, NM_001131007, NM_…	1519	592	15185	1.55354	0.150235	0.0022585	0.000379066
GO:2000145~regulation of cell motility	105	5.76923	2.11e-05	NM_025069, NM_000609, NM_000602, NM_002290, NM_001077710, NM_001077401, NM_002387, NM_002872, NM_003152, NM_001128204, NM_001128205, NM_001128206, NM_001135648, NM_000618, NM_001130834, NM_201277, NM_080872, NM_007353, NM_001033886, NM_001042692, NM_023110, NM_001127612, NM_001031702, NM_007074, NM_000104, NM_023108, NM_023105, NM_023107, NM_000963, NM_006072, NM_012411, NM_023106, NM_001168344, …	1519	700	15185	1.49951	0.16677	0.00249614	0.00042481
GO:0010646~regulation of cell communication	347	19.0659	2.16e-05	NM_001145147, NM_001144382, NM_001145146, NM_213594, NM_025069, NM_004210, NM_001145148, NM_005338, NM_001129731, NM_004348, NM_002387, NM_005899, NM_032638, NM_017526, NM_198517, NM_001146255, NM_000379, NM_001145648, NM_001040429, NM_001146254, NM_007353, NM_000283, NM_001033886, NM_000244, NM_005456, NM_005076, NM_000104, NM_000101, NM_012411, NM_001145412, NM_001145413, NM_005460, NM_00112732…	1519	2853	15185	1.21586	0.170182	0.00251775	0.000434361
GO:0010646~regulation of cell communication	347	19.0659	2.16e-05	NM_001145147, NM_001144382, NM_001145146, NM_213594, NM_025069, NM_004210, NM_001145148, NM_005338, NM_001129731, NM_004348, NM_002387, NM_005899, NM_032638, NM_017526, NM_198517, NM_001146255, NM_000379, NM_001145648, NM_001040429, NM_001146254, NM_007353, NM_000283, NM_001033886, NM_000244, NM_005456, NM_005076, NM_000104, NM_000101, NM_012411, NM_001145412, NM_001145413, NM_005460, NM_00112732…	1519	2853	15185	1.21586	0.170182	0.00251775	0.000434361
GO:0010646~regulation of cell communication	347	19.0659	2.16e-05	NM_001145147, NM_001144382, NM_001145146, NM_213594, NM_025069, NM_004210, NM_001145148, NM_005338, NM_001129731, NM_004348, NM_002387, NM_005899, NM_032638, NM_017526, NM_198517, NM_001146255, NM_000379, NM_001145648, NM_001040429, NM_001146254, NM_007353, NM_000283, NM_001033886, NM_000244, NM_005456, NM_005076, NM_000104, NM_000101, NM_012411, NM_001145412, NM_001145413, NM_005460, NM_00112732…	1519	2853	15185	1.21586	0.170182	0.00251775	0.000434361
GO:0042127~regulation of cell proliferation	193	10.6044	2.6e-05	NM_032315, NM_025069, NM_153631, NM_001922, NM_153632, NM_004210, NM_000609, NM_001077401, NM_004348, NM_002387, NM_002872, NM_001122659, NM_003152, NM_001168325, NM_001130715, NM_001136191, NM_003153, NM_001130716, NM_001128204, NM_032638, NM_001128205, NM_001128206, NM_000514, NM_001135648, NM_021991, NM_000278, NM_000618, NM_000379, NM_201277, NM_053001, NM_003236, NM_001168278, NM_004093, NM_…	1519	1458	15185	1.3233	0.201095	0.00298903	0.000522735
GO:0061337~cardiac conduction	24	1.31868	3.19e-05	NM_000165, NM_025213, NM_001129829, NM_153485, NM_174934, NM_152219, NM_152296, NM_172364, NM_001129827, NM_172115, NM_172114, NM_020977, NM_021991, NM_207396, NM_002667, NM_001008844, NM_001167945, NM_020971, NM_001127670, NM_000719, NM_004298, NM_172129, NM_172128, NM_172127, NM_001104631, NM_201572, NM_001221, NM_201597, NM_201571, NM_014591, NM_004415, NM_001127493, NM_001167623, NM_173195, N…	1519	93	15185	2.5798	0.240709	0.00361674	0.000641107
GO:0061337~cardiac conduction	24	1.31868	3.19e-05	NM_000165, NM_025213, NM_001129829, NM_153485, NM_174934, NM_152219, NM_152296, NM_172364, NM_001129827, NM_172115, NM_172114, NM_020977, NM_021991, NM_207396, NM_002667, NM_001008844, NM_001167945, NM_020971, NM_001127670, NM_000719, NM_004298, NM_172129, NM_172128, NM_172127, NM_001104631, NM_201572, NM_001221, NM_201597, NM_201571, NM_014591, NM_004415, NM_001127493, NM_001167623, NM_173195, N…	1519	93	15185	2.5798	0.240709	0.00361674	0.000641107
GO:0044708~single-organism behavior	64	3.51648	3.28e-05	NM_000165, NM_001114183, NM_000905, NM_020530, NM_199292, NM_199293, NM_172160, NM_000609, NM_002205, NM_024729, NM_016083, NM_001165975, NM_001098635, NM_003638, NM_001160259, NM_014213, NM_001160258, NM_001077186, NM_000910, NM_006272, NM_000514, NM_015321, NM_000916, NM_002211, NM_000810, NM_001145648, NM_001040429, NM_001024660, NM_004974, NM_001165037, NM_015080, NM_001033886, NM_006688, NM_…	1519	378	15185	1.69256	0.246869	0.00367525	0.000660065
GO:0072358~cardiovascular system development	129	7.08791	3.51e-05	NM_153631, NM_153632, NM_000602, NM_147147, NM_002290, NM_001142546, NM_153348, NM_001077401, NM_006738, NM_032638, NM_001128204, NM_001128205, NM_007349, NM_001128206, NM_021069, NM_002667, NM_001008844, NM_000618, NM_000379, NM_003236, NM_004093, NM_198392, NM_003243, NM_000384, NM_001042692, NM_023110, NM_203351, NM_001127612, NM_001003679, NM_152795, NM_000627, NM_152794, NM_007073, NM_031866…	1519	910	15185	1.41712	0.261372	0.00387658	0.00070532
GO:0072359~circulatory system development	129	7.08791	3.51e-05	NM_153631, NM_153632, NM_000602, NM_147147, NM_002290, NM_001142546, NM_153348, NM_001077401, NM_006738, NM_032638, NM_001128204, NM_001128205, NM_007349, NM_001128206, NM_021069, NM_002667, NM_001008844, NM_000618, NM_000379, NM_003236, NM_004093, NM_198392, NM_003243, NM_000384, NM_001042692, NM_023110, NM_203351, NM_001127612, NM_001003679, NM_152795, NM_000627, NM_152794, NM_007073, NM_031866…	1519	910	15185	1.41712	0.261372	0.00387658	0.00070532
GO:0007267~cell-cell signaling	190	10.4396	3.75e-05	NM_001145147, NM_001144382, NM_001145146, NM_025069, NM_004211, NM_004210, NM_001145148, NM_017519, NM_002587, NM_002387, NM_002590, NM_001098635, NM_001160259, NM_001160258, NM_012152, NM_001128204, NM_001128205, NM_001128206, NM_000514, NM_021991, NM_130843, NM_130842, NM_001040429, NM_001145648, NM_001143806, NM_001168278, NM_001143805, NM_013402, NM_004093, NM_207322, NM_000283, NM_001165037,…	1519	1441	15185	1.31809	0.277113	0.00409921	0.000755453
GO:0030334~regulation of cell migration	98	5.38462	4.02e-05	NM_025069, NM_000609, NM_000602, NM_002290, NM_001077710, NM_001077401, NM_002387, NM_002872, NM_003152, NM_001128204, NM_001128205, NM_001128206, NM_001135648, NM_000618, NM_001130834, NM_201277, NM_080872, NM_007353, NM_001033886, NM_001042692, NM_023110, NM_001127612, NM_001031702, NM_007074, NM_000104, NM_023108, NM_023105, NM_023107, NM_000963, NM_006072, NM_012411, NM_023106, NM_001168344, …	1519	653	15185	1.50027	0.293556	0.00433447	0.000808995
GO:0048736~appendage development	35	1.92308	4.26e-05	NM_000165, NM_017617, NM_001129829, NM_018413, NM_001129827, NM_003392, NM_002586, NM_198956, NM_001114979, NM_004348, NM_014714, NM_015662, NM_014213, NM_002449, NM_001114978, NM_001142462, NM_053001, NM_000719, NM_023111, NM_007353, NM_001042692, NM_002653, NM_001426, NM_023110, NM_001024630, NM_001167623, NM_152470, NM_001167624, NM_001129843, NM_001129844, NM_001167625, NM_001129846, NM_15371…	1519	167	15185	2.09512	0.308004	0.00453506	0.000857081
GO:0060173~limb development	35	1.92308	4.26e-05	NM_000165, NM_017617, NM_001129829, NM_018413, NM_001129827, NM_003392, NM_002586, NM_198956, NM_001114979, NM_004348, NM_014714, NM_015662, NM_014213, NM_002449, NM_001114978, NM_001142462, NM_053001, NM_000719, NM_023111, NM_007353, NM_001042692, NM_002653, NM_001426, NM_023110, NM_001024630, NM_001167623, NM_152470, NM_001167624, NM_001129843, NM_001129844, NM_001167625, NM_001129846, NM_15371…	1519	167	15185	2.09512	0.308004	0.00453506	0.000857081
GO:0003013~circulatory system process	77	4.23077	4.42e-05	NM_000165, NM_000905, NM_174934, NM_152219, NM_199292, NM_199293, NM_172364, NM_000609, NM_147147, NM_018848, NM_002845, NM_020733, NM_001171624, NM_133432, NM_016083, NM_001171625, NM_001171622, NM_001077401, NM_001171623, NM_133437, NM_001122659, NM_001077504, NM_133337, NM_001077505, NM_006738, NM_000908, NM_001077503, NM_001160259, NM_001160258, NM_002848, NM_001077506, NM_021991, NM_00100693…	1519	484	15185	1.59039	0.317344	0.00464484	0.0008887
GO:0035113~embryonic appendage morphogenesis	29	1.59341	4.53e-05	NM_000165, NM_017617, NM_001129829, NM_018413, NM_003392, NM_001129827, NM_002586, NM_198956, NM_001114979, NM_004348, NM_014213, NM_002449, NM_001114978, NM_001142462, NM_053001, NM_000719, NM_023111, NM_007353, NM_001042692, NM_002653, NM_001426, NM_023110, NM_001024630, NM_001167623, NM_001167624, NM_001129843, NM_001129844, NM_001167625, NM_001129846, NM_153715, NM_005523, NM_001129840, NM_00…	1519	127	15185	2.28271	0.324158	0.00470931	0.000912043
GO:0030326~embryonic limb morphogenesis	29	1.59341	4.53e-05	NM_000165, NM_017617, NM_001129829, NM_018413, NM_003392, NM_001129827, NM_002586, NM_198956, NM_001114979, NM_004348, NM_014213, NM_002449, NM_001114978, NM_001142462, NM_053001, NM_000719, NM_023111, NM_007353, NM_001042692, NM_002653, NM_001426, NM_023110, NM_001024630, NM_001167623, NM_001167624, NM_001129843, NM_001129844, NM_001167625, NM_001129846, NM_153715, NM_005523, NM_001129840, NM_00…	1519	127	15185	2.28271	0.324158	0.00470931	0.000912043
GO:0051049~regulation of transport	218	11.978	4.92e-05	NM_001145147, NM_001145146, NM_144707, NM_004915, NM_001145148, NM_005338, NM_153442, NM_001122659, NM_032638, NM_017526, NM_198517, NM_013302, NM_173162, NM_201277, NM_001040429, NM_001145648, NM_002599, NM_005348, NM_207322, NM_080870, NM_001033886, NM_007073, NM_005781, NM_007074, NM_000101, NM_007322, NM_012411, NM_007320, NM_001145412, NM_005460, NM_001145413, NM_080650, NM_001003954, NM_000…	1519	1698	15185	1.28344	0.346394	0.00504971	0.000989879
GO:0051049~regulation of transport	218	11.978	4.92e-05	NM_001145147, NM_001145146, NM_144707, NM_004915, NM_001145148, NM_005338, NM_153442, NM_001122659, NM_032638, NM_017526, NM_198517, NM_013302, NM_173162, NM_201277, NM_001040429, NM_001145648, NM_002599, NM_005348, NM_207322, NM_080870, NM_001033886, NM_007073, NM_005781, NM_007074, NM_000101, NM_007322, NM_012411, NM_007320, NM_001145412, NM_005460, NM_001145413, NM_080650, NM_001003954, NM_000…	1519	1698	15185	1.28344	0.346394	0.00504971	0.000989879
GO:0001501~skeletal system development	75	4.12088	5.06e-05	NM_153631, NM_153632, NM_153633, NM_014620, NM_018848, NR_003084, NM_001114979, NM_001077401, NM_001009994, NM_004348, NM_004962, NM_000478, NM_006738, NM_000908, NM_014213, NM_001114978, NM_001135254, NM_001128204, NM_001128205, NM_001128206, NM_002006, NM_152380, NM_024017, NM_001015880, NM_000618, NM_004670, NM_002318, NM_053001, NM_138570, NM_178232, NM_080679, NM_005920, NM_024409, NM_152989…	1519	470	15185	1.59522	0.35427	0.00513235	0.00101808
GO:0007166~cell surface receptor signaling pathway	300	16.4835	5.55e-05	NM_001145147, NM_001144382, NM_001145146, NM_213594, NM_025069, NM_004210, NM_001145148, NM_005338, NM_002387, NM_004348, NM_001122659, NM_032638, NM_017526, NM_001135648, NM_173164, NM_001146255, NM_173165, NM_173163, NM_000379, NM_001145648, NM_005348, NM_139245, NM_001146254, NM_000283, NM_001033886, NM_000244, NM_005781, NM_005076, NM_007074, NM_016441, NM_000101, NM_012411, NM_002473, NM_001…	1519	2448	15185	1.22509	0.381021	0.0055622	0.00111652
GO:0071495~cellular response to endogenous stimulus	153	8.40659	6.04e-05	NM_001145147, NM_001145146, NM_025069, NM_032315, NM_004210, NM_001145148, NM_203472, NM_001077401, NM_004348, NM_003638, NM_003152, NM_006092, NM_001136191, NM_001128204, NM_001128205, NM_017526, NM_001128206, NM_001135648, NM_021991, NM_013302, NM_000278, NM_003743, NM_002599, NM_198392, NM_003243, NM_000384, NM_001104631, NM_003338, NM_152989, NM_000244, NM_023083, NM_023110, NM_023085, NM_001…	1519	1128	15185	1.35594	0.406582	0.0059804	0.00121462
GO:0045666~positive regulation of neuron differentiation	52	2.85714	6.35e-05	NM_004210, NM_138559, NM_000609, NM_147223, NM_001171624, NM_001171625, NM_016083, NM_001171622, NM_153348, NM_001171623, NM_001098635, NM_001160259, NM_001160258, NM_012152, NM_032638, NM_013302, NM_015321, NM_003743, NM_001143806, NM_001166176, NM_001143805, NM_001166175, NM_198403, NM_002220, NM_001024660, NM_001033886, NM_023110, NM_005171, NM_006898, NM_170732, NM_000965, NM_170731, NM_02310…	1519	294	15185	1.76813	0.4222	0.00621387	0.00127665
GO:0051130~positive regulation of cellular component organization	152	8.35165	6.56e-05	NM_032451, NM_025069, NM_144707, NM_004210, NM_000609, NM_001040135, NM_005338, NM_153442, NM_000602, NM_001165977, NM_001165978, NM_153348, NM_001098635, NM_002872, NM_001160259, NM_001160258, NM_001142446, NM_012152, NM_032638, NM_017526, NM_001025204, NM_007349, NM_000514, NM_013302, NM_000278, NM_001025203, NM_000618, NM_014946, NM_003236, NM_001143806, NM_001168278, NM_001143805, NM_005348, …	1519	1121	15185	1.35549	0.432675	0.00634856	0.00131921
GO:0009893~positive regulation of metabolic process	345	18.956	7.18e-05	NM_001145147, NM_001145146, NM_213594, NM_144707, NM_004915, NM_004210, NM_017519, NM_001145148, NM_005338, NM_002586, NM_016655, NM_016654, NM_004348, NM_001122659, NM_001130715, NM_005485, NM_001130716, NM_032638, NM_007349, NM_000278, NM_173164, NM_173165, NM_173163, NM_201277, NM_000379, NM_001003931, NM_153453, NM_005348, NM_001136031, NM_000384, NM_017530, NM_000244, NM_173159, NM_007073, N…	1519	2875	15185	1.19961	0.462193	0.00686803	0.00144348
GO:0048583~regulation of response to stimulus	397	21.8132	7.18e-05	NM_005091, NM_001144382, NM_025069, NM_213594, NM_004210, NM_005338, NM_138939, NM_001129731, NM_004348, NM_002387, NM_001122659, NM_138940, NM_005899, NM_032638, NM_017526, NM_007349, NM_138806, NM_198517, NM_173164, NM_173165, NM_001146255, NM_173163, NM_001145648, NM_000379, NM_002599, NM_006329, NM_005348, NM_001146254, NM_007353, NM_000283, NM_001033886, NM_005498, NM_000244, NM_005456, NM_0…	1519	3364	15185	1.17975	0.462344	0.00679588	0.00144413
GO:0048583~regulation of response to stimulus	397	21.8132	7.18e-05	NM_005091, NM_001144382, NM_025069, NM_213594, NM_004210, NM_005338, NM_138939, NM_001129731, NM_004348, NM_002387, NM_001122659, NM_138940, NM_005899, NM_032638, NM_017526, NM_007349, NM_138806, NM_198517, NM_173164, NM_173165, NM_001146255, NM_173163, NM_001145648, NM_000379, NM_002599, NM_006329, NM_005348, NM_001146254, NM_007353, NM_000283, NM_001033886, NM_005498, NM_000244, NM_005456, NM_0…	1519	3364	15185	1.17975	0.462344	0.00679588	0.00144413
GO:0007178~transmembrane receptor protein serine/threonine kinase signaling pathway	53	2.91209	7.21e-05	NM_001166265, NM_001166264, NM_001166266, NM_025069, NM_001343, NM_000801, NM_002844, NM_001077401, NM_004348, NM_004962, NM_003638, NM_001128204, NM_001128205, NM_001128206, NM_001135648, NM_002211, NM_002213, NM_001166176, NM_001168278, NM_054014, NM_001166175, NM_139245, NM_003243, NM_152832, NM_003338, NM_015318, NM_178849, NM_000244, NM_003128, NM_175914, NM_000627, NM_001166691, NM_022469, …	1519	303	15185	1.7486	0.463848	0.00675251	0.00145065
GO:0050808~synapse organization	41	2.25275	7.28e-05	NM_001101662, NM_012301, NM_004210, NM_001005389, NM_003392, NM_012309, NM_001128636, NM_003285, NM_201414, NM_201413, NM_001098635, NM_001005388, NM_014718, NM_015090, NM_004441, NM_001005862, NM_000514, NM_013302, NM_032531, NM_000916, NM_001081560, NM_152744, NM_001081562, NM_001081563, NM_001167945, NM_001040429, NM_015569, NM_001143806, NM_001143805, NM_013962, NM_001144952, NM_015009, NM_20…	1519	214	15185	1.91526	0.466839	0.0067399	0.00146366
GO:0050678~regulation of epithelial cell proliferation	51	2.8022	7.3e-05	NM_000165, NM_001259, NM_025069, NM_000609, NM_001171624, NM_002845, NM_001171625, NM_002844, NM_001114979, NM_001171622, NM_001171623, NM_001077401, NM_002387, NM_001122659, NM_003152, NM_001114978, NM_002020, NM_001128204, NM_001128205, NM_001128206, NM_002006, NM_001135648, NM_178328, NM_000278, NM_178329, NM_000618, NM_000379, NM_053001, NM_003236, NM_004093, NM_003243, NM_138576, NM_00100370…	1519	288	15185	1.77025	0.467887	0.00668922	0.00146823
GO:0050673~epithelial cell proliferation	57	3.13187	7.49e-05	NM_000165, NM_001259, NM_025069, NM_015331, NM_000609, NM_001171624, NM_002845, NM_001171625, NM_002844, NM_001114979, NM_001171622, NM_001171623, NM_001077401, NM_002387, NM_003152, NM_016087, NM_001114978, NM_003153, NM_002020, NM_001128204, NM_001128205, NM_001128206, NM_002006, NM_001135648, NM_178328, NM_000278, NM_178329, NM_000618, NM_000379, NM_002318, NM_053001, NM_003236, NM_004093, NM_…	1519	334	15185	1.70603	0.476491	0.0067895	0.00150614
GO:0008284~positive regulation of cell proliferation	114	6.26374	8.09e-05	NM_025069, NM_032315, NM_153631, NM_153632, NM_001922, NM_000609, NM_001077401, NM_004348, NM_001122659, NM_002872, NM_003152, NM_001130715, NM_001130716, NM_000514, NM_000278, NM_000618, NM_053001, NM_003236, NM_001168278, NM_004093, NM_003243, NM_001033886, NM_023110, NM_001129889, NM_001127612, NM_007074, NM_006618, NM_000965, NM_000101, NM_023108, NM_023105, NM_023107, NM_000963, NM_006072, N…	1519	799	15185	1.42631	0.503174	0.00726015	0.00162779
GO:0009966~regulation of signal transduction	312	17.1429	8.48e-05	NM_001144382, NM_213594, NM_025069, NM_004210, NM_005338, NM_001129731, NM_002387, NM_004348, NM_005899, NM_032638, NM_017526, NM_198517, NM_001146255, NM_000379, NM_001145648, NM_001146254, NM_007353, NM_000283, NM_001033886, NM_000244, NM_005456, NM_005076, NM_000104, NM_000101, NM_012411, NM_001145412, NM_001145413, NM_006206, NM_007327, NM_005066, NM_001200, NM_080657, NM_001203, NM_001042428…	1519	2574	15185	1.21172	0.519473	0.00752691	0.00170534
GO:0009966~regulation of signal transduction	312	17.1429	8.48e-05	NM_001144382, NM_213594, NM_025069, NM_004210, NM_005338, NM_001129731, NM_002387, NM_004348, NM_005899, NM_032638, NM_017526, NM_198517, NM_001146255, NM_000379, NM_001145648, NM_001146254, NM_007353, NM_000283, NM_001033886, NM_000244, NM_005456, NM_005076, NM_000104, NM_000101, NM_012411, NM_001145412, NM_001145413, NM_006206, NM_007327, NM_005066, NM_001200, NM_080657, NM_001203, NM_001042428…	1519	2574	15185	1.21172	0.519473	0.00752691	0.00170534
GO:0009966~regulation of signal transduction	312	17.1429	8.48e-05	NM_001144382, NM_213594, NM_025069, NM_004210, NM_005338, NM_001129731, NM_002387, NM_004348, NM_005899, NM_032638, NM_017526, NM_198517, NM_001146255, NM_000379, NM_001145648, NM_001146254, NM_007353, NM_000283, NM_001033886, NM_000244, NM_005456, NM_005076, NM_000104, NM_000101, NM_012411, NM_001145412, NM_001145413, NM_006206, NM_007327, NM_005066, NM_001200, NM_080657, NM_001203, NM_001042428…	1519	2574	15185	1.21172	0.519473	0.00752691	0.00170534
GO:0090287~regulation of cellular response to growth factor stimulus	42	2.30769	8.73e-05	NM_001166265, NM_001166264, NM_017617, NM_001166266, NM_025069, NM_001343, NM_018413, NM_001145102, NM_212535, NM_003392, NM_002205, NM_001171624, NM_001171625, NM_001171622, NM_001077401, NM_001171623, NM_004348, NM_001033756, NM_003638, NM_133337, NM_130800, NM_130801, NM_130802, NM_002449, NM_130803, NM_130804, NM_001128204, NM_001128205, NM_001128206, NM_002006, NM_015170, NM_000379, NM_18133…	1519	223	15185	1.88279	0.529801	0.00767041	0.00175585
GO:0007165~signal transduction	590	32.4176	9.19e-05	NM_005091, NM_001145147, NM_001145146, NM_025069, NM_001145148, NM_004210, NM_153442, NM_002387, NM_016943, NM_001122659, NM_017526, NM_001135648, NM_001004303, NM_000278, NM_173164, NM_173165, NM_173163, NM_002599, NM_139245, NM_080872, NM_181690, NM_000283, NM_001001960, NM_001033886, NM_000244, NM_005456, NM_005076, NM_005781, NM_007074, NM_014689, NM_182966, NM_205860, NM_001703, NM_006305, N…	1519	5224	15185	1.12903	0.547955	0.00798786	0.00184738
GO:0044699~single-organism process	1276	70.1099	9.31e-05	NM_005091, NM_001145147, NM_001014434, NM_001145146, NM_145330, NM_004211, NM_001922, NM_004210, NM_001145148, NM_138375, NM_002586, NM_002587, NM_002590, NM_001122659, NM_004204, NM_004207, NM_005485, NM_001130715, NM_001130716, NM_001135648, NM_032531, NM_130843, NM_130842, NM_173164, NM_001008844, NM_001076552, NM_173165, NM_173162, NM_080676, NM_173163, NM_001003931, NM_002599, NM_058216, NM_…	1519	12212	15185	1.04453	0.552787	0.00801491	0.00187237
GO:0050790~regulation of catalytic activity	272	14.9451	9.43e-05	NM_001145147, NM_001145146, NM_144707, NM_004210, NM_001145148, NM_005338, NM_001007232, NM_001129731, NM_080869, NM_001122659, NM_175867, NM_001135191, NM_198517, NM_130843, NM_000278, NM_130842, NM_001146255, NM_000379, NM_001145648, NM_005348, NM_001146254, NM_000244, NM_005456, NM_001135188, NM_007073, NM_005781, NM_001135187, NM_001040158, NM_016441, NM_001135189, NM_000101, NM_012411, NM_02…	1519	2206	15185	1.2326	0.55736	0.00803683	0.00189626
GO:0050790~regulation of catalytic activity	272	14.9451	9.43e-05	NM_001145147, NM_001145146, NM_144707, NM_004210, NM_001145148, NM_005338, NM_001007232, NM_001129731, NM_080869, NM_001122659, NM_175867, NM_001135191, NM_198517, NM_130843, NM_000278, NM_130842, NM_001146255, NM_000379, NM_001145648, NM_005348, NM_001146254, NM_000244, NM_005456, NM_001135188, NM_007073, NM_005781, NM_001135187, NM_001040158, NM_016441, NM_001135189, NM_000101, NM_012411, NM_02…	1519	2206	15185	1.2326	0.55736	0.00803683	0.00189626
GO:0051179~localization	615	33.7912	9.52e-05	NM_001145147, NM_001014433, NM_001145146, NM_025069, NM_004211, NM_001145148, NM_004210, NM_153442, NM_139235, NM_015899, NM_001130107, NM_002387, NM_001122659, NM_005485, NM_004207, NM_017526, NM_001135648, NM_013302, NM_032531, NM_130843, NM_130842, NM_001008844, NM_173162, NM_002599, NM_001003931, NM_006329, NM_001136031, NM_207322, NM_080872, NM_080870, NM_005498, NM_001033886, NM_005072, NM_…	1519	5470	15185	1.12394	0.560886	0.00803613	0.00191485
GO:0010604~positive regulation of macromolecule metabolic process	325	17.8571	9.62e-05	NM_213594, NM_144707, NM_004210, NM_017519, NM_005338, NM_002586, NM_016655, NM_016654, NM_004348, NM_001122659, NM_001130715, NM_005485, NM_001130716, NM_032638, NM_007349, NM_000278, NM_173164, NM_173165, NM_173163, NM_201277, NM_000379, NM_001003931, NM_153453, NM_001136031, NM_000384, NM_017530, NM_000244, NM_173159, NM_007073, NM_005781, NM_005076, NM_001040158, NM_005360, NM_012411, NM_0024…	1519	2698	15185	1.2042	0.564598	0.00804018	0.00193458
GO:0060048~cardiac muscle contraction	26	1.42857	0.000107	NM_000165, NM_001129829, NM_153485, NM_174934, NM_152296, NM_001129827, NM_133432, NM_133378, NM_133437, NM_172115, NM_172114, NM_020977, NM_021991, NM_207396, NM_002667, NM_001008844, NM_001167945, NM_001127670, NM_000719, NM_001166176, NM_005348, NM_004298, NM_172129, NM_001166175, NM_002052, NM_004832, NM_172128, NM_033437, NM_172127, NM_001104631, NM_201572, NM_001221, NM_201597, NM_201571, N…	1519	113	15185	2.30013	0.603483	0.00885513	0.00215201
GO:0060048~cardiac muscle contraction	26	1.42857	0.000107	NM_000165, NM_001129829, NM_153485, NM_174934, NM_152296, NM_001129827, NM_133432, NM_133378, NM_133437, NM_172115, NM_172114, NM_020977, NM_021991, NM_207396, NM_002667, NM_001008844, NM_001167945, NM_001127670, NM_000719, NM_001166176, NM_005348, NM_004298, NM_172129, NM_001166175, NM_002052, NM_004832, NM_172128, NM_033437, NM_172127, NM_001104631, NM_201572, NM_001221, NM_201597, NM_201571, N…	1519	113	15185	2.30013	0.603483	0.00885513	0.00215201
GO:0008015~blood circulation	75	4.12088	0.000109	NM_000165, NM_000905, NM_174934, NM_152219, NM_199292, NM_199293, NM_172364, NM_000609, NM_147147, NM_018848, NM_002845, NM_001171624, NM_133432, NM_016083, NM_001171625, NM_001171622, NM_001077401, NM_001171623, NM_133437, NM_001122659, NM_001077504, NM_133337, NM_001077505, NM_000908, NM_001077503, NM_001160259, NM_001160258, NM_002848, NM_001077506, NM_021991, NM_001006932, NM_000916, NM_00051…	1519	481	15185	1.55874	0.608968	0.00890267	0.00218438
GO:0070848~response to growth factor	90	4.94505	0.000112	NM_001166265, NM_020441, NM_001166264, NM_001166266, NM_025069, NM_199292, NM_001343, NM_000801, NM_199293, NM_002205, NM_001171624, NM_002844, NM_001171625, NM_001171622, NM_001077401, NM_001171623, NM_004348, NM_004962, NM_003638, NM_133337, NM_002020, NM_001128204, NM_001128205, NM_001128206, NM_013302, NM_001135648, NM_002006, NM_000278, NM_002211, NM_002213, NM_002599, NM_000379, NM_054014, …	1519	604	15185	1.48958	0.61879	0.0090569	0.00224349
GO:0006935~chemotaxis	80	4.3956	0.000112	NM_020441, NM_001014434, NM_001006943, NM_002203, NM_000609, NM_000602, NM_175613, NM_002845, NM_001171624, NM_001171625, NM_005201, NM_001171622, NM_001171623, NM_001122659, NM_002872, NM_015090, NM_002848, NM_002006, NM_001025201, NM_178328, NM_024017, NM_020526, NM_178329, NM_175607, NM_001143806, NM_001143805, NM_004093, NM_182690, NM_198309, NM_080872, NM_147204, NM_138576, NM_001104631, NM_…	1519	522	15185	1.53206	0.619505	0.00899002	0.00224786
GO:0042330~taxis	80	4.3956	0.000119	NM_020441, NM_001014434, NM_001006943, NM_002203, NM_000609, NM_000602, NM_175613, NM_002845, NM_001171624, NM_001171625, NM_005201, NM_001171622, NM_001171623, NM_001122659, NM_002872, NM_015090, NM_002848, NM_002006, NM_001025201, NM_178328, NM_024017, NM_020526, NM_178329, NM_175607, NM_001143806, NM_001143805, NM_004093, NM_182690, NM_198309, NM_080872, NM_147204, NM_138576, NM_001104631, NM_…	1519	523	15185	1.52913	0.641803	0.00946119	0.00238817
GO:0045944~positive regulation of transcription from RNA polymerase II promoter	128	7.03297	0.000129	NM_213594, NM_002199, NM_002586, NM_000602, NM_016655, NM_016654, NM_001077401, NM_015986, NM_001130715, NM_003153, NM_001130716, NM_032638, NM_000514, NM_000278, NM_173164, NM_173165, NM_000618, NM_001130834, NM_003743, NM_173163, NM_053001, NM_001168278, NM_153453, NM_198392, NM_017530, NM_000244, NM_000620, NM_001127612, NM_002698, NM_182645, NM_152795, NM_152794, NM_017826, NM_031866, NM_0053…	1519	928	15185	1.37886	0.461691	0.186525	0.00243781
GO:0045944~positive regulation of transcription from RNA polymerase II promoter	135	7.41758	0.000122	NM_213594, NM_002199, NM_002586, NM_000602, NM_016655, NM_016654, NM_001077401, NM_004348, NM_003638, NM_015986, NM_001130715, NM_003153, NM_001130716, NM_032638, NM_007349, NM_000514, NM_000278, NM_173164, NM_173165, NM_000618, NM_001130834, NM_003743, NM_173163, NM_053001, NM_001168278, NM_153453, NM_198392, NM_017530, NM_000244, NM_000620, NM_001127612, NM_002698, NM_182645, NM_152795, NM_1527…	1519	987	15185	1.36733	0.651709	0.00962963	0.00245333
GO:0044057~regulation of system process	75	4.12088	0.000124	NM_000165, NM_001145147, NM_001145146, NM_174934, NM_152219, NM_199292, NM_199293, NM_001145148, NM_172364, NM_002203, NM_147147, NM_002845, NM_001122659, NM_001077504, NM_001077505, NM_006738, NM_001077503, NM_002848, NM_001077506, NM_004770, NM_000910, NM_021991, NM_000916, NM_207396, NM_002667, NM_001008844, NM_000618, NM_001167945, NM_001127670, NM_001166176, NM_005348, NM_000719, NM_004298, …	1519	483	15185	1.55228	0.657631	0.00969693	0.00249317
GO:0051705~multi-organism behavior	17	0.934066	0.000126	NM_001426, NM_001136130, NM_199292, NM_199293, NM_012309, NM_018848, NM_201414, NM_201413, NM_001161707, NM_003947, NM_014618, NM_021973, NM_032531, NM_007327, NM_000916, NM_053004, NM_138732, NM_000832, NM_014141, NM_000484, NM_178864, NM_021569, NM_001024660, NM_000360, NM_001136129, NM_017551, NM_001080420, NM_170784, NM_015080	1519	58	15185	2.93007	0.662028	0.0097253	0.00252319
GO:0006942~regulation of striated muscle contraction	21	1.15385	0.000126	NM_001129829, NM_001129827, NM_172115, NM_172114, NM_020977, NM_021991, NM_001081560, NM_207396, NM_002667, NM_001008844, NM_001081562, NM_001081563, NM_001166176, NM_000719, NM_005348, NM_001166175, NM_172129, NM_002052, NM_004832, NM_172128, NM_033437, NM_172127, NM_001104631, NM_001221, NM_004415, NM_001083, NM_001127493, NM_001167623, NM_000620, NM_001167624, NM_001042782, NM_001129843, NM_00…	1519	82	15185	2.56013	0.662915	0.00966212	0.0025293
GO:0006942~regulation of striated muscle contraction	21	1.15385	0.000126	NM_001129829, NM_001129827, NM_172115, NM_172114, NM_020977, NM_021991, NM_001081560, NM_207396, NM_002667, NM_001008844, NM_001081562, NM_001081563, NM_001166176, NM_000719, NM_005348, NM_001166175, NM_172129, NM_002052, NM_004832, NM_172128, NM_033437, NM_172127, NM_001104631, NM_001221, NM_004415, NM_001083, NM_001127493, NM_001167623, NM_000620, NM_001167624, NM_001042782, NM_001129843, NM_00…	1519	82	15185	2.56013	0.662915	0.00966212	0.0025293
GO:0051216~cartilage development	35	1.92308	0.000127	NM_153631, NM_153632, NM_153633, NM_018413, NM_001145102, NM_001754, NM_003392, NM_014620, NM_018848, NM_000230, NM_001077401, NM_004348, NM_002449, NM_001135254, NM_002345, NM_001128204, NM_001128205, NM_001128206, NM_001142462, NM_002006, NM_015170, NM_002318, NM_053001, NM_080681, NM_080680, NM_023111, NM_001145811, NM_080679, NM_024409, NM_005920, NM_001145819, NM_152989, NM_002653, NM_023110…	1519	176	15185	1.98798	0.666396	0.00966802	0.00255342
GO:0043542~endothelial cell migration	31	1.7033	0.000128	NM_020441, NM_017617, NM_001170717, NM_003392, NM_001170718, NM_001170715, NM_001170716, NM_001170714, NM_002845, NM_001171624, NM_001171625, NM_001171622, NM_001170720, NM_001171623, NM_001077401, NM_001105244, NM_133376, NM_001033756, NM_003152, NM_002165, NM_001018070, NM_058176, NM_058177, NM_002020, NM_007349, NM_002006, NM_002211, NM_002318, NM_015278, NM_004093, NM_023111, NM_006164, NM_03…	1519	148	15185	2.09391	0.667788	0.00961993	0.00256312
GO:0044765~single-organism transport	372	20.4396	0.00013	NM_001145147, NM_001145146, NM_004211, NM_004915, NM_004210, NM_001145148, NM_139235, NM_015899, NM_001122659, NM_004207, NM_032638, NM_198517, NM_130843, NM_130842, NM_173162, NM_002599, NM_000379, NM_001145648, NM_201277, NM_006329, NM_005348, NM_207322, NM_000384, NM_001165037, NM_001033886, NM_001142864, NM_005072, NM_001004312, NM_005076, NM_007074, NM_000101, NM_019625, NM_019624, NM_012411…	1519	3150	15185	1.18056	0.674348	0.00970844	0.00260945
GO:1903508~positive regulation of nucleic acid-templated transcription	168	9.23077	0.000133	NM_002199, NM_213594, NM_017519, NM_002586, NM_000602, NM_016655, NM_016654, NM_001077401, NM_004348, NM_015986, NM_003638, NM_001168325, NM_001130715, NM_003153, NM_001130716, NM_032638, NM_007349, NM_000514, NM_000278, NM_173164, NM_173165, NM_000618, NM_173163, NM_001130834, NM_003743, NM_053001, NM_001168278, NM_153453, NM_198392, NM_017530, NM_000244, NM_173159, NM_000620, NM_001127612, NM_0…	1519	1278	15185	1.31412	0.682129	0.0098316	0.00266563
GO:0045893~positive regulation of transcription, DNA-templated	168	9.23077	0.000133	NM_002199, NM_213594, NM_017519, NM_002586, NM_000602, NM_016655, NM_016654, NM_001077401, NM_004348, NM_015986, NM_003638, NM_001168325, NM_001130715, NM_003153, NM_001130716, NM_032638, NM_007349, NM_000514, NM_000278, NM_173164, NM_173165, NM_000618, NM_173163, NM_001130834, NM_003743, NM_053001, NM_001168278, NM_153453, NM_198392, NM_017530, NM_000244, NM_173159, NM_000620, NM_001127612, NM_0…	1519	1278	15185	1.31412	0.682129	0.0098316	0.00266563
GO:1902680~positive regulation of RNA biosynthetic process	170	9.34066	0.000141	NM_002199, NM_213594, NM_017519, NM_002586, NM_000602, NM_016655, NM_016654, NM_001077401, NM_004348, NM_015986, NM_003638, NM_001168325, NM_001130715, NM_003153, NM_001130716, NM_032638, NM_007349, NM_000514, NM_000278, NM_173164, NM_173165, NM_000618, NM_173163, NM_001130834, NM_003743, NM_053001, NM_001168278, NM_153453, NM_198392, NM_017530, NM_000244, NM_173159, NM_000620, NM_001127612, NM_0…	1519	1297	15185	1.31029	0.703133	0.0103264	0.0028244
GO:0009887~organ morphogenesis	131	7.1978	0.000163	NM_001014434, NM_153631, NM_153632, NM_153633, NM_001077401, NM_001009994, NM_004348, NM_003638, NM_003153, NM_032638, NM_001128204, NM_001128205, NM_001128206, NM_000514, NM_152380, NM_000278, NM_001008844, NM_053001, NM_003236, NM_001168278, NM_004093, NM_198392, NM_003243, NM_080679, NM_001042692, NM_023110, NM_001127612, NM_006898, NM_006618, NM_000965, NM_023108, NM_019102, NM_023105, NM_023…	1519	959	15185	1.36556	0.75582	0.0118768	0.00327803
GO:0048646~anatomical structure formation involved in morphogenesis	148	8.13187	0.000165	NM_213594, NM_153631, NM_153632, NM_004210, NM_017802, NM_000602, NM_001142546, NM_001077401, NM_001009994, NM_002590, NM_080860, NM_003638, NM_152388, NM_032638, NM_001128204, NM_001128205, NM_001128206, NM_000514, NM_000278, NM_206996, NM_003236, NM_003551, NM_004093, NM_198392, NM_003243, NM_001042692, NM_023110, NM_000620, NM_001127612, NM_001003679, NM_152795, NM_152794, NM_001135188, NM_001…	1519	1108	15185	1.3353	0.759643	0.0119086	0.00331466
GO:0035176~social behavior	14	0.769231	0.000196	NM_014618, NM_001426, NM_007327, NM_199292, NM_000916, NM_199293, NM_053004, NM_138732, NM_012309, NM_018848, NM_000832, NM_014141, NM_021569, NM_178864, NM_003947, NM_001024660, NM_000360, NM_017551, NM_001080420, NM_170784, NM_015080	1519	43	15185	3.25474	0.61038	0.209939	0.00370788
GO:0060284~regulation of cell development	114	6.26374	0.000191	NM_025069, NM_001922, NM_004210, NM_000609, NM_153348, NM_001098635, NM_001122659, NM_006738, NM_001160259, NM_030760, NM_001160258, NM_012152, NM_032638, NM_000514, NM_001025201, NM_013302, NM_000278, NM_000618, NM_003743, NM_001143806, NM_001143805, NM_001168278, NM_080872, NM_001033886, NM_023110, NM_001129889, NM_000620, NM_001127612, NM_001031702, NM_005076, NM_006898, NM_000965, NM_023108, …	1519	816	15185	1.3966	0.807538	0.0136383	0.00383036
GO:0051703~intraspecies interaction between organisms	14	0.769231	0.000196	NM_014618, NM_001426, NM_007327, NM_199292, NM_000916, NM_199293, NM_053004, NM_138732, NM_012309, NM_018848, NM_000832, NM_014141, NM_021569, NM_178864, NM_003947, NM_001024660, NM_000360, NM_017551, NM_001080420, NM_170784, NM_015080	1519	43	15185	3.25474	0.816192	0.0139014	0.00393709
GO:0035176~social behavior	14	0.769231	0.000196	NM_014618, NM_001426, NM_007327, NM_199292, NM_000916, NM_199293, NM_053004, NM_138732, NM_012309, NM_018848, NM_000832, NM_014141, NM_021569, NM_178864, NM_003947, NM_001024660, NM_000360, NM_017551, NM_001080420, NM_170784, NM_015080	1519	43	15185	3.25474	0.816192	0.0139014	0.00393709
GO:0007411~axon guidance	31	1.7033	0.000209	NM_025213, NM_015656, NM_001006943, NM_001005389, NM_003392, NM_000609, NM_175613, NM_003285, NM_001005388, NM_001079823, NM_015090, NM_002848, NM_004441, NM_020526, NM_175607, NM_020971, NM_001143806, NM_001143805, NM_133369, NM_004093, NM_198309, NM_182690, NM_080872, NM_001033886, NM_198310, NM_021229, NM_003128, NM_030671, NM_030670, NM_001127612, NM_005076, NM_022370, NM_020796, NM_170732, N…	1519	152	15185	2.0388	0.634472	0.182319	0.00395847
GO:0001568~blood vessel development	83	4.56044	0.000198	NM_000165, NM_001166265, NM_001166264, NM_002303, NM_001166266, NM_153631, NM_153632, NM_000602, NM_002290, NM_002205, NM_002845, NM_020733, NM_002401, NM_001171624, NM_001142546, NM_001105206, NM_001171625, NM_001171622, NM_001077401, NM_001171623, NM_153348, NM_001105209, NM_001105208, NM_001105207, NM_058176, NM_058177, NM_002020, NM_032638, NM_001128204, NM_001128205, NM_007349, NM_033631, NM…	1519	556	15185	1.49231	0.819181	0.0139207	0.00397512
GO:0051128~regulation of cellular component organization	268	14.7253	0.000208	NM_025069, NM_144707, NM_004210, NM_001040135, NM_005338, NM_153442, NM_024729, NM_153348, NM_032638, NM_017526, NM_007349, NM_198517, NM_013302, NM_000278, NM_201277, NM_006329, NM_005348, NM_001039535, NM_001136031, NM_080870, NM_007353, NM_001033886, NM_001142864, NM_007073, NM_005781, NM_005076, NM_001040158, NM_007074, NM_016441, NM_000101, NM_002473, NM_001093767, NM_025099, NM_001145412, N…	1519	2196	15185	1.22	0.834269	0.0143905	0.00417721
GO:0048598~embryonic morphogenesis	83	4.56044	0.000211	NM_000165, NM_153631, NM_153632, NM_199292, NM_199293, NM_153633, NM_002203, NM_147223, NM_002586, NM_014620, NM_018848, NM_002205, NM_001142546, NM_001114979, NM_004348, NM_002590, NM_002403, NM_003638, NM_014213, NM_033267, NM_016087, NM_001114978, NM_032638, NM_001128204, NM_017459, NM_001128205, NM_033631, NM_001128206, NM_000514, NM_002006, NM_152380, NM_000278, NM_002211, NM_002213, NM_0037…	1519	557	15185	1.48964	0.838337	0.0144722	0.00423485
GO:0048598~embryonic morphogenesis	83	4.56044	0.000211	NM_000165, NM_153631, NM_153632, NM_199292, NM_199293, NM_153633, NM_002203, NM_147223, NM_002586, NM_014620, NM_018848, NM_002205, NM_001142546, NM_001114979, NM_004348, NM_002590, NM_002403, NM_003638, NM_014213, NM_033267, NM_016087, NM_001114978, NM_032638, NM_001128204, NM_017459, NM_001128205, NM_033631, NM_001128206, NM_000514, NM_002006, NM_152380, NM_000278, NM_002211, NM_002213, NM_0037…	1519	557	15185	1.48964	0.838337	0.0144722	0.00423485
GO:0048514~blood vessel morphogenesis	73	4.01099	0.000211	NM_000165, NM_002303, NM_153631, NM_153632, NM_000602, NM_002205, NM_002845, NM_001171624, NM_020733, NM_001171625, NM_001171622, NM_001077401, NM_001171623, NM_058176, NM_058177, NM_002020, NM_032638, NM_001128204, NM_001128205, NM_007349, NM_001128206, NM_002006, NM_178328, NM_002211, NM_178329, NM_002318, NM_000379, NM_003236, NM_001166176, NM_004093, NM_001166175, NM_198392, NM_182691, NM_003…	1519	475	15185	1.53634	0.838514	0.0143667	0.00423739
GO:0009790~embryo development	126	6.92308	0.000211	NM_153631, NM_153632, NM_153633, NM_002586, NM_001142546, NM_153348, NM_001077401, NM_001009994, NM_004348, NM_002590, NM_003638, NM_032638, NM_001128204, NM_001128205, NM_001128206, NM_000514, NM_152380, NM_000278, NM_000618, NM_003743, NM_053001, NM_198392, NM_000384, NM_007353, NM_001042692, NM_023110, NM_001127612, NM_006898, NM_000965, NM_023108, NM_019102, NM_023105, NM_016580, NM_012174, N…	1519	921	15185	1.36763	0.838763	0.0142664	0.00424096
GO:0034109~homotypic cell-cell adhesion	19	1.04396	0.000233	NM_002350, NM_004415, NM_025069, NM_002230, NM_003701, NM_001614, NM_003373, NM_000663, NM_002473, NM_133177, NM_133178, NM_006206, NM_005704, NM_001288, NM_021991, NM_001130004, NM_000518, NM_001008844, NM_000212, NM_001130005, NM_033012, NM_080548, NM_080549, NM_001111097, NM_014000, NM_006257, NM_002886, NM_002831, NM_001102, NM_020686, NM_139022	1519	73	15185	2.60188	0.86638	0.0156017	0.00467656
GO:0006941~striated muscle contraction	31	1.7033	0.000236	NM_000165, NM_001129829, NM_153485, NM_174934, NM_152296, NM_001129827, NM_024729, NM_133432, NM_133378, NM_133437, NM_172115, NM_172114, NM_001077186, NM_020977, NM_021991, NM_001145809, NM_207396, NM_001081560, NM_002667, NM_001081562, NM_001008844, NM_001081563, NM_001167945, NM_001127670, NM_000719, NM_005348, NM_001166176, NM_004298, NM_172129, NM_001166175, NM_002052, NM_004832, NM_172128, …	1519	153	15185	2.02548	0.869819	0.0156806	0.00473699
GO:0051241~negative regulation of multicellular organismal process	130	7.14286	0.000241	NM_005091, NM_213594, NM_203472, NM_000602, NM_001077401, NM_002387, NM_001098635, NM_001122659, NM_005899, NM_001130715, NM_001130716, NM_032638, NM_001128204, NM_001128205, NM_001128206, NM_000278, NM_002667, NM_000618, NM_000379, NM_001104631, NM_000244, NM_023110, NM_031862, NM_001127612, NM_000620, NM_001031702, NM_005076, NM_000965, NM_000101, NM_023108, NM_019102, NM_023105, NM_021080, NM_…	1519	959	15185	1.35513	0.87507	0.0158727	0.00483243
GO:0045667~regulation of osteoblast differentiation	24	1.31868	0.000269	NM_000165, NM_001259, NM_000244, NM_017617, NM_031862, NM_001024630, NM_001145102, NM_001145306, NM_001111285, NM_001114979, NM_020223, NM_001111283, NM_006157, NM_004348, NM_000594, NM_004962, NM_002165, NM_130800, NM_130801, NM_130802, NM_005899, NM_016204, NM_130803, NM_002449, NM_130804, NM_130799, NM_001114978, NM_001114980, NM_001114981, NM_001288, NM_002335, NM_181353, NM_021973, NM_002006…	1519	106	15185	2.26341	0.902244	0.0175936	0.00540074
GO:0007613~memory	22	1.20879	0.000275	NM_001114183, NM_152296, NM_199292, NM_199293, NM_000827, NM_012309, NM_002205, NM_016083, NM_001115, NM_003947, NM_003638, NM_000963, NM_001160259, NM_001160258, NM_000844, NM_001098482, NM_001143676, NM_014618, NM_006272, NM_015321, NM_007327, NM_000916, NM_002744, NM_001145648, NM_001033582, NM_002891, NM_153815, NM_001744, NM_000832, NM_001033581, NM_001160226, NM_021569, NM_178864, NM_001024…	1519	93	15185	2.36481	0.907247	0.0178525	0.00552241
GO:0007613~memory	22	1.20879	0.000275	NM_001114183, NM_152296, NM_199292, NM_199293, NM_000827, NM_012309, NM_002205, NM_016083, NM_001115, NM_003947, NM_003638, NM_000963, NM_001160259, NM_001160258, NM_000844, NM_001098482, NM_001143676, NM_014618, NM_006272, NM_015321, NM_007327, NM_000916, NM_002744, NM_001145648, NM_001033582, NM_002891, NM_153815, NM_001744, NM_000832, NM_001033581, NM_001160226, NM_021569, NM_178864, NM_001024…	1519	93	15185	2.36481	0.907247	0.0178525	0.00552241
GO:0061061~muscle structure development	84	4.61538	0.000276	NM_000165, NM_000801, NM_004210, NM_172160, NM_147147, NM_020733, NM_133432, NM_001171624, NM_024729, NM_001171625, NM_187841, NM_001171622, NM_001171623, NM_133437, NM_003638, NM_001122659, NM_006738, NM_014213, NM_058176, NM_001077186, NM_033071, NM_001135254, NM_058177, NM_199289, NM_021069, NM_006272, NM_002006, NM_002211, NM_001008844, NM_002107, NM_000618, NM_001143806, NM_054014, NM_001143…	1519	570	15185	1.4732	0.907979	0.017778	0.00554077
GO:0071625~vocalization behavior	7	0.384615	0.000293	NM_024729, NM_014141, NM_014618, NM_015570, NM_001145809, NM_001127231, NM_138732, NM_012309, NM_001077186, NM_001080420, NM_015080	1519	11	15185	6.36154	0.920551	0.0187228	0.00588094
GO:0051254~positive regulation of RNA metabolic process	173	9.50549	0.000295	NM_002199, NM_213594, NM_017519, NM_002586, NM_000602, NM_016655, NM_016654, NM_001077401, NM_004348, NM_015986, NM_003638, NM_001168325, NM_001130715, NM_003153, NM_001130716, NM_032638, NM_007349, NM_000514, NM_000278, NM_173164, NM_173165, NM_000618, NM_173163, NM_001130834, NM_003743, NM_053001, NM_001168278, NM_153453, NM_198392, NM_017530, NM_000244, NM_173159, NM_000620, NM_001127612, NM_0…	1519	1343	15185	1.28774	0.921775	0.0186983	0.00591689
GO:0016043~cellular component organization	635	34.8901	0.000297	NM_001014434, NM_145330, NM_025069, NM_017519, NM_004210, NM_001040135, NM_153442, NM_024729, NM_001130107, NM_080860, NM_005485, NM_017526, NM_001135648, NM_013302, NM_032531, NM_000278, NM_001008844, NM_002599, NM_001003931, NM_006329, NM_058216, NM_001136031, NM_207322, NM_080872, NM_080870, NM_080679, NM_181690, NM_025065, NM_001033886, NM_000244, NM_005072, NM_001004312, NM_001135610, NM_021…	1519	5718	15185	1.11016	0.923483	0.0187214	0.00596799
GO:0034765~regulation of ion transmembrane transport	59	3.24176	0.000307	NM_001145147, NM_000165, NM_003149, NM_001145146, NM_033272, NM_174934, NM_000801, NM_174936, NM_001145148, NM_172160, NM_172364, NM_001168325, NM_014555, NM_004770, NM_207396, NM_003740, NM_002667, NM_173162, NM_001167945, NM_001145648, NM_001127670, NM_054014, NM_000719, NM_004974, NM_001104631, NM_201597, NM_001118890, NM_001127493, NM_000620, NM_170736, NM_007074, NM_130797, NM_032387, NM_000…	1519	368	15185	1.60273	0.929538	0.0191764	0.00615882
GO:0061036~positive regulation of cartilage development	11	0.604396	0.000326	NM_033326, NM_001024630, NM_017508, NM_001145102, NM_003392, NM_002318, NM_005523, NM_000020, NM_001200, NM_001077401, NM_001145811, NM_004348, NM_001203, NM_001015051, NM_005902, NM_001145819, NM_016204, NM_152989	1519	29	15185	3.79185	0.940375	0.0202251	0.00654526
GO:0090257~regulation of muscle system process	36	1.97802	0.000329	NM_001129829, NM_007200, NM_002203, NM_001129827, NM_172115, NM_172114, NM_006738, NM_024940, NM_000743, NM_004770, NM_000910, NM_001006628, NM_001006627, NM_001006626, NM_020977, NM_021991, NM_000916, NM_207396, NM_001081560, NM_002667, NM_001081562, NM_001008844, NM_001081563, NM_000618, NM_000719, NM_005348, NM_001006629, NM_001166176, NM_172129, NM_001166175, NM_002052, NM_004832, NM_172128, …	1519	192	15185	1.87438	0.941691	0.0202384	0.0065969
GO:0016310~phosphorylation	255	14.011	0.000334	NM_001144382, NM_144707, NM_004210, NM_001122659, NM_005899, NM_198517, NM_013302, NM_001004023, NM_001146255, NM_000379, NM_001145648, NM_005348, NM_139245, NM_001146254, NM_024876, NM_181690, NM_000244, NM_005456, NM_005781, NM_001040158, NM_012411, NM_006206, NM_007327, NM_001200, NM_000115, NM_001080395, NM_001203, NM_002350, NM_001759, NM_007200, NM_000230, NM_001112, NM_001115, NM_001033756…	1519	2092	15185	1.21853	0.944088	0.0203891	0.00669402
GO:0055117~regulation of cardiac muscle contraction	18	0.989011	0.000348	NM_001129829, NM_001129827, NM_172115, NM_172114, NM_020977, NM_021991, NM_207396, NM_002667, NM_001008844, NM_001166176, NM_005348, NM_000719, NM_001166175, NM_172129, NM_004832, NM_002052, NM_172128, NM_033437, NM_172127, NM_001104631, NM_001221, NM_004415, NM_001083, NM_001127493, NM_001167623, NM_000620, NM_001167624, NM_001129843, NM_002230, NM_001129844, NM_001167625, NM_001129846, NM_00438…	1519	69	15185	2.60784	0.95044	0.0210836	0.00697296
GO:0055117~regulation of cardiac muscle contraction	18	0.989011	0.000348	NM_001129829, NM_001129827, NM_172115, NM_172114, NM_020977, NM_021991, NM_207396, NM_002667, NM_001008844, NM_001166176, NM_005348, NM_000719, NM_001166175, NM_172129, NM_004832, NM_002052, NM_172128, NM_033437, NM_172127, NM_001104631, NM_001221, NM_004415, NM_001083, NM_001127493, NM_001167623, NM_000620, NM_001167624, NM_001129843, NM_002230, NM_001129844, NM_001167625, NM_001129846, NM_00438…	1519	69	15185	2.60784	0.95044	0.0210836	0.00697296
GO:0002062~chondrocyte differentiation	21	1.15385	0.000348	NM_023110, NM_001024630, NM_001145102, NM_018413, NM_001754, NM_005523, NM_001077401, NM_004348, NM_000965, NM_023108, NM_023105, NM_023107, NM_023106, NM_002449, NM_001128204, NM_001128205, NM_001128206, NM_033326, NM_001142462, NM_015170, NM_181709, NM_017508, NM_002318, NM_017813, NM_053001, NM_000020, NM_016152, NM_001200, NM_080681, NM_080680, NM_023111, NM_001145811, NM_001203, NM_001015051…	1519	88	15185	2.38558	0.950601	0.0209591	0.00698046
GO:0071363~cellular response to growth factor stimulus	85	4.67033	0.000357	NM_001166265, NM_020441, NM_001166264, NM_001166266, NM_025069, NM_199292, NM_001343, NM_000801, NM_199293, NM_002205, NM_001171624, NM_002844, NM_001171625, NM_001171622, NM_001077401, NM_001171623, NM_004348, NM_004962, NM_003638, NM_133337, NM_002020, NM_001128204, NM_001128205, NM_001128206, NM_013302, NM_001135648, NM_002006, NM_000278, NM_002211, NM_002213, NM_002599, NM_000379, NM_054014, …	1519	583	15185	1.4575	0.954176	0.0213283	0.00715419
GO:0016337~single organismal cell-cell adhesion	96	5.27473	0.000373	NM_001259, NM_002303, NM_025069, NM_015331, NM_000801, NM_002119, NM_000609, NM_033646, NM_147147, NM_175613, NM_002205, NM_004348, NM_014358, NM_003638, NM_002872, NM_015090, NM_003153, NM_005535, NM_199440, NM_021991, NM_000518, NM_002211, NM_001008844, NM_002213, NM_000618, NM_175607, NM_005204, NM_004361, NM_054014, NM_004093, NM_147204, NM_138576, NM_033437, NM_001128922, NM_015080, NM_00103…	1519	676	15185	1.41965	0.960137	0.0221286	0.00747636
GO:0051962~positive regulation of nervous system development	66	3.62637	0.000375	NM_001922, NM_004210, NM_138559, NM_000609, NM_147223, NM_001171624, NM_001171625, NM_016083, NM_001171622, NM_001171623, NM_153348, NM_001098635, NM_001160259, NM_001160258, NM_012152, NM_032638, NM_013302, NM_002006, NM_015321, NM_000916, NM_000278, NM_003743, NM_001143806, NM_001143805, NM_001166176, NM_001166175, NM_198403, NM_001024660, NM_002220, NM_001033886, NM_001129889, NM_023110, NM_00…	1519	427	15185	1.54516	0.961008	0.0221267	0.00752744
GO:0048523~negative regulation of cellular process	458	25.1648	0.000388	NM_005091, NM_001145147, NM_001014434, NM_001145146, NM_025069, NM_004210, NM_001145148, NM_001007232, NM_080869, NM_002387, NM_001122659, NM_175867, NM_001130715, NM_001130716, NM_017526, NM_001135648, NM_013302, NM_000278, NM_173164, NM_173165, NM_173163, NM_002599, NM_001136031, NM_001033886, NM_000244, NM_005456, NM_021795, NM_005076, NM_007074, NM_001040158, NM_001136046, NM_025099, NM_00100…	1519	4012	15185	1.1412	0.965033	0.0227063	0.00777921
GO:0098602~single organism cell adhesion	102	5.6044	0.000409	NM_001259, NM_002303, NM_025069, NM_015331, NM_000801, NM_002119, NM_000609, NM_033646, NM_147147, NM_175613, NM_002205, NM_004348, NM_014358, NM_002872, NM_003638, NM_015090, NM_003153, NM_005535, NM_199440, NM_021991, NM_000518, NM_002211, NM_001008844, NM_000618, NM_002213, NM_175607, NM_004361, NM_005204, NM_054014, NM_004093, NM_005929, NM_147204, NM_138576, NM_033437, NM_018715, NM_00112892…	1519	729	15185	1.39872	0.970932	0.0237814	0.00820608
GO:0071840~cellular component organization or biogenesis	648	35.6044	0.000436	NM_001014434, NM_145330, NM_025069, NM_017519, NM_004210, NM_001040135, NM_153442, NM_024729, NM_139235, NM_001130107, NM_080860, NM_005485, NM_017526, NM_001135648, NM_013302, NM_032531, NM_000278, NM_001008844, NM_001003931, NM_002599, NM_006329, NM_058216, NM_001136031, NM_207322, NM_080872, NM_080870, NM_080679, NM_181690, NM_025065, NM_001033886, NM_000244, NM_005072, NM_001004312, NM_001135…	1519	5865	15185	1.1045	0.976953	0.0249861	0.00874211
GO:0031328~positive regulation of cellular biosynthetic process	204	11.2088	0.000446	NM_001145147, NM_001145146, NM_213594, NM_002199, NM_017519, NM_001145148, NM_002586, NM_000602, NM_016655, NM_016654, NM_001077401, NM_004348, NM_015986, NM_003638, NM_001168325, NM_001130715, NM_003153, NM_001130716, NM_032638, NM_007349, NM_000514, NM_000278, NM_000518, NM_173164, NM_173165, NM_000618, NM_173163, NM_003743, NM_001130834, NM_053001, NM_001168278, NM_153453, NM_005348, NM_198392…	1519	1635	15185	1.2473	0.97885	0.02538	0.0089404
GO:0001649~osteoblast differentiation	35	1.92308	0.000462	NM_000165, NM_001259, NM_017617, NM_002157, NM_015472, NM_001145102, NM_001145306, NM_001042762, NM_003106, NM_001114979, NM_006157, NM_004348, NM_004962, NM_000478, NM_002165, NM_130800, NM_130801, NM_005899, NM_130802, NM_002449, NM_130803, NM_130804, NM_001114978, NM_002006, NM_003290, NM_000618, NM_002107, NM_014390, NM_001168278, NM_005920, NM_024409, NM_012118, NM_000244, NM_031862, NM_0010…	1519	188	15185	1.86109	0.981493	0.0260753	0.00924841
GO:0001525~angiogenesis	62	3.40659	0.000466	NM_002303, NM_153631, NM_153632, NM_000602, NM_002205, NM_001171624, NM_002845, NM_001171625, NM_001171622, NM_001171623, NM_001077401, NM_058176, NM_058177, NM_002020, NM_032638, NM_001128204, NM_001128205, NM_001128206, NM_002006, NM_178328, NM_002211, NM_178329, NM_002318, NM_003236, NM_004093, NM_198392, NM_182691, NM_182692, NM_023110, NM_175736, NM_001003679, NM_032784, NM_152795, NM_004040…	1519	398	15185	1.55728	0.982205	0.0261573	0.00933892
GO:1902578~single-organism localization	387	21.2637	0.000478	NM_001145147, NM_001145146, NM_004211, NM_004915, NM_001145148, NM_004210, NM_139235, NM_015899, NM_001122659, NM_004207, NM_032638, NM_198517, NM_130843, NM_130842, NM_173162, NM_001145648, NM_000379, NM_201277, NM_002599, NM_006329, NM_005348, NM_207322, NM_000384, NM_001165037, NM_001033886, NM_001142864, NM_005072, NM_001004312, NM_005076, NM_007074, NM_000101, NM_019625, NM_019624, NM_002473…	1519	3341	15185	1.15795	0.983929	0.0266373	0.00957406
GO:0050890~cognition	42	2.30769	0.000482	NM_001114183, NM_199292, NM_152296, NM_199293, NM_172160, NM_012309, NM_003285, NM_002205, NM_016083, NM_001165975, NM_201414, NM_201413, NM_001115, NM_133376, NM_001099433, NM_003638, NM_001160259, NM_001160258, NM_001098482, NM_000844, NM_006272, NM_015321, NM_000916, NM_002211, NM_000810, NM_001145648, NM_001033582, NM_198309, NM_001033581, NM_001024660, NM_005438, NM_001165037, NM_015080, NM_…	1519	241	15185	1.74216	0.984525	0.0267051	0.00966109
GO:0010557~positive regulation of macromolecule biosynthetic process	190	10.4396	0.000489	NM_002199, NM_213594, NM_017519, NM_002586, NM_000602, NM_016655, NM_016654, NM_001077401, NM_004348, NM_015986, NM_003638, NM_001168325, NM_001130715, NM_003153, NM_001130716, NM_032638, NM_007349, NM_000514, NM_000278, NM_173164, NM_173165, NM_000618, NM_173163, NM_003743, NM_001130834, NM_053001, NM_001168278, NM_153453, NM_198392, NM_017530, NM_000244, NM_023110, NM_173159, NM_000620, NM_0011…	1519	1510	15185	1.25786	0.985454	0.0269242	0.00980399
GO:0007010~cytoskeleton organization	142	7.8022	0.000506	NM_032451, NM_004210, NM_000609, NM_001040135, NM_017802, NM_017707, NM_005338, NM_024729, NM_080860, NM_002872, NM_006738, NM_001142446, NM_001077186, NM_145060, NM_021069, NM_021991, NM_206996, NM_001008844, NM_014946, NM_201277, NM_001039535, NM_001033886, NM_001042692, NM_032432, NM_023083, NM_003128, NM_023085, NM_001127612, NM_015183, NM_001135188, NM_001135187, NM_005076, NM_007074, NM_001…	1519	1082	15185	1.31195	0.987379	0.0276389	0.0101312
GO:0048729~tissue morphogenesis	87	4.78022	0.000506	NM_000165, NM_001343, NM_000801, NM_002203, NM_018848, NM_002205, NM_020733, NM_133432, NM_001171624, NM_001142546, NM_001114979, NM_001171625, NM_001171622, NM_001077401, NM_001171623, NM_133437, NM_002590, NM_003638, NM_004159, NM_033267, NM_016087, NM_001114978, NM_001135254, NM_001128204, NM_001128205, NM_033631, NM_001128206, NM_000514, NM_002006, NM_000278, NM_002211, NM_001008844, NM_05401…	1519	606	15185	1.43517	0.987431	0.0274909	0.0101407
GO:0031346~positive regulation of cell projection organization	48	2.63736	0.000511	NM_020441, NM_144707, NM_004210, NM_138559, NM_002203, NM_000609, NM_001171624, NM_001165977, NM_001171625, NM_001165978, NM_016083, NM_001171622, NM_001171623, NM_153348, NM_001098635, NM_002872, NM_001160259, NM_001160258, NM_012152, NM_015321, NM_013302, NM_001143806, NM_001143805, NM_005348, NM_002220, NM_001024660, NM_001003700, NM_001033886, NM_023110, NM_005171, NM_170732, NM_170731, NM_02…	1519	288	15185	1.66612	0.987908	0.0275578	0.01023
GO:0009605~response to external stimulus	233	12.8022	0.000513	NM_005091, NM_001014434, NM_080869, NM_001122659, NM_001130715, NM_001130716, NM_000278, NM_201277, NM_002599, NM_013402, NM_001136031, NM_080872, NM_000384, NM_000283, NM_001033886, NM_005498, NM_005076, NM_007074, NM_000101, NM_012411, NM_001145412, NM_001145413, NM_006206, NM_006499, NM_007327, NM_000115, NM_001080466, NM_080657, NM_001203, NM_001400, NM_001145425, NM_002350, NM_017617, NM_015…	1519	1905	15185	1.22269	0.988095	0.027482	0.0102659
GO:0044093~positive regulation of molecular function	215	11.8132	0.000514	NM_001145147, NM_001144382, NM_001145146, NM_004210, NM_001145148, NM_014957, NM_017707, NM_005338, NM_001129731, NM_001025598, NM_003449, NM_006092, NM_006738, NM_175867, NM_001168325, NM_012454, NM_012152, NM_001113361, NM_001135191, NM_014550, NM_000514, NM_021991, NM_001025201, NM_198517, NM_000618, NM_001145648, NM_000379, NM_006869, NM_005204, NM_001143806, NM_003236, NM_001143805, NM_00333…	1519	1739	15185	1.23594	0.98825	0.0273924	0.0102961
GO:0010033~response to organic substance	315	17.3077	0.000534	NM_001145147, NM_001145146, NM_025069, NM_004915, NM_004210, NM_001145148, NM_004348, NM_001122659, NM_032638, NM_017526, NM_001135648, NM_013302, NM_130843, NM_000278, NM_130842, NM_001146255, NM_002599, NM_000379, NM_013402, NM_005348, NM_001146254, NM_000384, NM_001033886, NM_000244, NM_007074, NM_001136044, NM_000104, NM_005980, NM_000101, NM_030789, NM_012411, NM_001145412, NM_001145413, NM_…	1519	2668	15185	1.18027	0.990135	0.0282803	0.010699
GO:0051716~cellular response to stimulus	692	38.022	0.000535	NM_001145147, NM_005091, NM_001145146, NM_025069, NM_001145148, NM_004210, NM_153442, NM_002387, NM_016943, NM_001122659, NM_005485, NM_017526, NM_001135648, NM_013302, NM_130843, NM_001004303, NM_000278, NM_130842, NM_173164, NM_173165, NM_173163, NM_080676, NM_001003931, NM_002599, NM_006329, NM_058216, NM_001136031, NM_139245, NM_080872, NM_181690, NM_000283, NM_001001960, NM_001033886, NM_000…	1519	6309	15185	1.09648	0.990216	0.0281576	0.010718
GO:0021877~forebrain neuron fate commitment	7	0.384615	0.000536	NM_032638, NM_022898, NM_001127612, NM_138576, NM_018008, NM_004316, NM_001079668, NM_001145661, NM_001145662, NM_003317, NM_003502, NM_181050	1519	12	15185	5.83141	0.990319	0.0280506	0.0107424
GO:0009725~response to hormone	111	6.0989	0.000541	NM_000165, NM_001145147, NM_001135255, NM_001135256, NM_001145146, NM_002303, NM_032315, NM_001006943, NM_004915, NM_001343, NM_199292, NM_001145148, NM_199293, NM_174936, NM_002203, NM_000609, NM_147223, NM_203472, NM_018848, NM_000478, NM_003152, NM_058176, NM_058177, NM_001136191, NM_017526, NM_006272, NM_199440, NM_002317, NM_013302, NM_000916, NM_002667, NM_020526, NM_002107, NM_003743, NM_0…	1519	813	15185	1.36486	0.990708	0.0281249	0.0108369
GO:0009891~positive regulation of biosynthetic process	206	11.3187	0.000608	NM_001145147, NM_001145146, NM_213594, NM_002199, NM_004915, NM_017519, NM_001145148, NM_002586, NM_000602, NM_016655, NM_016654, NM_001077401, NM_004348, NM_015986, NM_003638, NM_001168325, NM_001130715, NM_003153, NM_001130716, NM_032638, NM_007349, NM_000514, NM_000278, NM_000518, NM_173164, NM_173165, NM_000618, NM_173163, NM_003743, NM_001130834, NM_053001, NM_001168278, NM_153453, NM_005348…	1519	1663	15185	1.23832	0.994773	0.0311546	0.0121614
GO:0060429~epithelium development	134	7.36264	0.000612	NM_025069, NM_001142546, NM_001077401, NM_001009994, NM_002590, NM_014553, NM_003153, NM_001128204, NM_001128205, NM_001128206, NM_000514, NM_018647, NM_000278, NM_001008844, NM_001130834, NM_002599, NM_000379, NM_001168278, NM_004093, NM_198392, NM_001104631, NM_001042692, NM_000244, NM_023110, NM_001127612, NM_001031847, NM_001040158, NM_006618, NM_005360, NM_000965, NM_023108, NM_019102, NM_02…	1519	1016	15185	1.31846	0.994948	0.0309856	0.0122396
GO:0008016~regulation of heart contraction	39	2.14286	0.000618	NM_000165, NM_174934, NM_152219, NM_199292, NM_199293, NM_172364, NM_147147, NM_021991, NM_207396, NM_002667, NM_001008844, NM_001167945, NM_001127670, NM_001166176, NM_005348, NM_000719, NM_001166175, NM_004298, NM_033437, NM_024409, NM_001104631, NM_201597, NM_001083, NM_001127493, NM_000620, NM_007073, NM_000432, NM_003130, NM_001006631, NM_001006630, NM_001165899, NM_001048230, NM_001148, NM_…	1519	221	15185	1.76413	0.99521	0.0311105	0.0123621
GO:0051050~positive regulation of transport	118	6.48352	0.000643	NM_004915, NM_000609, NM_005338, NM_153442, NM_000602, NM_001122659, NM_002872, NM_001168325, NM_012152, NM_032638, NM_017526, NM_001025204, NM_000514, NM_021991, NM_013302, NM_001025203, NM_000618, NM_005348, NM_080870, NM_001033886, NM_023083, NM_003128, NM_023110, NM_023085, NM_000620, NM_004712, NM_000101, NM_023108, NM_023105, NM_007322, NM_012411, NM_023107, NM_000963, NM_023106, NM_003326,…	1519	877	15185	1.34505	0.996131	0.0321473	0.0128533
GO:0040007~growth	119	6.53846	0.000684	NM_005091, NM_032315, NM_000609, NM_001077401, NM_015986, NM_003152, NM_014553, NM_001130715, NM_012152, NM_001130716, NM_021069, NM_000618, NM_006329, NM_001143806, NM_001143805, NM_001168278, NM_003243, NM_001104631, NM_001033886, NM_023110, NM_001031702, NM_001003679, NM_001040158, NM_006618, NM_016441, NM_000965, NM_000101, NM_023108, NM_001143807, NM_019102, NM_023105, NM_023107, NM_023106, …	1519	887	15185	1.34116	0.997295	0.0337921	0.0136758
GO:0040017~positive regulation of locomotion	62	3.40659	0.000733	NM_025069, NM_001343, NM_002203, NM_000609, NM_147147, NM_000602, NM_001077710, NM_002205, NM_001171624, NM_001171625, NM_001171622, NM_001171623, NM_002872, NM_003152, NM_058176, NM_058177, NM_002020, NM_002006, NM_000618, NM_147204, NM_001003700, NM_001033886, NM_023110, NM_001031702, NM_004040, NM_007073, NM_007074, NM_001111285, NM_002527, NM_001111283, NM_000594, NM_023108, NM_199168, NM_023…	1519	405	15185	1.53036	0.998231	0.0355665	0.0146511
GO:0046903~secretion	136	7.47253	0.000752	NM_001145147, NM_001145146, NM_004210, NM_001145148, NM_000609, NM_000602, NM_002872, NM_001122659, NM_003152, NM_001160259, NM_001160258, NM_001142446, NM_032638, NM_000514, NM_130843, NM_130842, NM_000618, NM_003743, NM_000379, NM_006329, NM_207322, NM_001033886, NM_023083, NM_003128, NM_023110, NM_023085, NM_003660, NM_000625, NM_002698, NM_001031847, NM_004712, NM_007074, NM_006618, NM_000101…	1519	1039	15185	1.30852	0.998493	0.0362444	0.0150182
GO:0065007~biological regulation	1104	60.6593	0.000764	NM_005091, NM_001145147, NM_001014434, NM_001145146, NM_001922, NM_004210, NM_001145148, NM_138375, NM_002586, NM_001122659, NM_005485, NM_001130715, NM_001130716, NM_001135648, NM_130843, NM_130842, NM_032534, NM_173164, NM_001008844, NM_173165, NM_173162, NM_173163, NM_001003931, NM_002599, NM_058216, NM_001136031, NM_207322, NM_080679, NM_005498, NM_005072, NM_173159, NM_005456, NM_001135610, …	1519	10492	15185	1.05188	0.998648	0.0366345	0.0152672
GO:0060348~bone development	32	1.75824	0.000771	NM_001025356, NM_001142680, NM_007200, NM_000230, NM_004348, NM_001009994, NM_005197, NM_000478, NM_015662, NM_006738, NM_002449, NM_001128204, NM_001128205, NM_001128206, NM_001142462, NM_015170, NM_001015880, NM_000618, NM_004670, NM_033012, NM_053001, NM_138570, NM_024409, NM_005920, NM_001024630, NM_001037984, NM_003701, NM_001003845, NM_005523, NM_001085471, NM_032682, NM_001111285, NM_00111…	1519	171	15185	1.87073	0.99873	0.0367702	0.0154103
GO:0051336~regulation of hydrolase activity	159	8.73626	0.000776	NM_144707, NM_194271, NM_014957, NM_017707, NM_005338, NM_000602, NM_147147, NM_001007232, NM_001129731, NM_080869, NM_001165977, NM_001025598, NM_001165978, NM_006092, NM_006738, NM_012454, NM_001135191, NM_001113361, NM_000514, NM_198517, NM_001025201, NM_130843, NM_000278, NM_130842, NM_002667, NM_000379, NM_001145648, NM_006869, NM_003128, NM_023110, NM_000620, NM_001003679, NM_001135188, NM_…	1519	1245	15185	1.27669	0.998775	0.0367639	0.0154935
GO:0001944~vasculature development	84	4.61538	0.000779	NM_000165, NM_001166265, NM_001166264, NM_002303, NM_001166266, NM_153631, NM_153632, NM_000602, NM_002290, NM_002205, NM_002845, NM_020733, NM_002401, NM_001171624, NM_001142546, NM_001105206, NM_001171625, NM_001171622, NM_001077401, NM_001171623, NM_153348, NM_001105209, NM_001105208, NM_001105207, NM_058176, NM_058177, NM_002020, NM_032638, NM_001128204, NM_001128205, NM_007349, NM_033631, NM…	1519	589	15185	1.42568	0.998815	0.0367434	0.0155706
GO:0031325~positive regulation of cellular metabolic process	315	17.3077	0.000786	NM_001145147, NM_001145146, NM_213594, NM_144707, NM_004210, NM_001145148, NM_017519, NM_005338, NM_002586, NM_016655, NM_016654, NM_004348, NM_001122659, NM_001130715, NM_005485, NM_001130716, NM_032638, NM_007349, NM_000278, NM_173164, NM_173165, NM_173163, NM_000379, NM_001003931, NM_153453, NM_005348, NM_001136031, NM_017530, NM_000244, NM_173159, NM_007073, NM_005781, NM_005076, NM_005360, N…	1519	2682	15185	1.17411	0.998879	0.0368376	0.015697
GO:0034762~regulation of transmembrane transport	59	3.24176	0.0008	NM_001145147, NM_000165, NM_003149, NM_001145146, NM_033272, NM_174934, NM_000801, NM_174936, NM_001145148, NM_172160, NM_172364, NM_001168325, NM_014555, NM_004770, NM_207396, NM_003740, NM_002667, NM_173162, NM_001167945, NM_001145648, NM_001127670, NM_054014, NM_000719, NM_004974, NM_001104631, NM_201597, NM_001118890, NM_001127493, NM_000620, NM_170736, NM_007074, NM_130797, NM_032387, NM_000…	1519	382	15185	1.54399	0.99901	0.0372971	0.0159821
GO:0010720~positive regulation of cell development	69	3.79121	0.000807	NM_025069, NM_001922, NM_001343, NM_004210, NM_138559, NM_000609, NM_147223, NM_001171624, NM_001171625, NM_016083, NM_001171622, NM_001171623, NM_153348, NM_001098635, NM_001160259, NM_001160258, NM_012152, NM_032638, NM_000514, NM_013302, NM_015321, NM_000278, NM_000618, NM_003743, NM_001143806, NM_001143805, NM_001166176, NM_001168278, NM_001166175, NM_198403, NM_001024660, NM_033437, NM_00222…	1519	464	15185	1.48658	0.999065	0.0373995	0.0161138
GO:0010720~positive regulation of cell development	69	3.79121	0.000807	NM_025069, NM_001922, NM_001343, NM_004210, NM_138559, NM_000609, NM_147223, NM_001171624, NM_001171625, NM_016083, NM_001171622, NM_001171623, NM_153348, NM_001098635, NM_001160259, NM_001160258, NM_012152, NM_032638, NM_000514, NM_013302, NM_015321, NM_000278, NM_000618, NM_003743, NM_001143806, NM_001143805, NM_001166176, NM_001168278, NM_001166175, NM_198403, NM_001024660, NM_033437, NM_00222…	1519	464	15185	1.48658	0.999065	0.0373995	0.0161138
GO:0048519~negative regulation of biological process	486	26.7033	0.000817	NM_005091, NM_001145147, NM_001014434, NM_001145146, NM_025069, NM_004210, NM_001145148, NM_001007232, NM_080869, NM_002387, NM_001122659, NM_175867, NM_001130715, NM_001130716, NM_017526, NM_001135648, NM_013302, NM_130843, NM_000278, NM_130842, NM_173164, NM_173165, NM_173163, NM_002599, NM_001136031, NM_001033886, NM_000244, NM_005456, NM_021795, NM_005781, NM_005076, NM_007074, NM_001040158, …	1519	4316	15185	1.12567	0.999141	0.0376397	0.0163063
GO:0050794~regulation of cellular process	1008	55.3846	0.000851	NM_005091, NM_001145147, NM_001014434, NM_001145146, NM_001922, NM_004210, NM_001145148, NM_138375, NM_002586, NM_001122659, NM_005485, NM_001130715, NM_001130716, NM_001135648, NM_032534, NM_173164, NM_173165, NM_001008844, NM_173162, NM_173163, NM_001003931, NM_002599, NM_058216, NM_001136031, NM_207322, NM_005498, NM_173159, NM_005456, NM_001135610, NM_005076, NM_005781, NM_001136046, NM_00546…	1519	9508	15185	1.05981	0.99936	0.0389735	0.0169818
GO:0050794~regulation of cellular process	1008	55.3846	0.000851	NM_005091, NM_001145147, NM_001014434, NM_001145146, NM_001922, NM_004210, NM_001145148, NM_138375, NM_002586, NM_001122659, NM_005485, NM_001130715, NM_001130716, NM_001135648, NM_032534, NM_173164, NM_173165, NM_001008844, NM_173162, NM_173163, NM_001003931, NM_002599, NM_058216, NM_001136031, NM_207322, NM_005498, NM_173159, NM_005456, NM_001135610, NM_005076, NM_005781, NM_001136046, NM_00546…	1519	9508	15185	1.05981	0.99936	0.0389735	0.0169818
GO:0045664~regulation of neuron differentiation	77	4.23077	0.000862	NM_004210, NM_138559, NM_000609, NM_147223, NM_175613, NM_001171624, NM_001171625, NM_016083, NM_001171622, NM_001171623, NM_153348, NM_001098635, NM_001122659, NM_001160259, NM_001160258, NM_030760, NM_002848, NM_012152, NM_032638, NM_013302, NM_015321, NM_001025201, NM_003743, NM_175607, NM_001143806, NM_001143805, NM_001166176, NM_001166175, NM_147204, NM_198403, NM_138576, NM_001024660, NM_00…	1519	532	15185	1.44689	0.999419	0.0392699	0.0172041
GO:1903522~regulation of blood circulation	47	2.58242	0.000864	NM_000165, NM_174934, NM_152219, NM_199292, NM_199293, NM_172364, NM_147147, NM_002845, NM_021991, NM_000916, NM_207396, NM_002667, NM_001008844, NM_001167945, NM_001127670, NM_000719, NM_001166176, NM_005348, NM_001166175, NM_004298, NM_000567, NM_033437, NM_024409, NM_001104631, NM_201597, NM_001083, NM_001127493, NM_000620, NM_000625, NM_007073, NM_000432, NM_000963, NM_003130, NM_001006631, N…	1519	287	15185	1.63709	0.99943	0.0391568	0.0172455
GO:0043271~negative regulation of ion transport	23	1.26374	0.000899	NM_001145147, NM_001145146, NM_000620, NM_000801, NM_174936, NM_001145148, NM_172160, NM_181502, NM_000663, NM_000230, NM_016083, NM_032387, NM_172115, NM_004382, NM_172114, NM_001127668, NM_005109, NM_001232, NM_000963, NM_001160259, NM_001160258, NM_003130, NM_000844, NM_198901, NM_001127669, NM_020398, NM_000219, NM_001048230, NM_018979, NM_002667, NM_000674, NM_001743, NM_001127670, NM_054014…	1519	108	15185	2.12893	0.999579	0.0405	0.0179386
GO:0007611~learning or memory	37	2.03297	0.000979	NM_001114183, NM_152296, NM_199292, NM_199293, NM_172160, NM_012309, NM_003285, NM_002205, NM_016083, NM_001165975, NM_201414, NM_201413, NM_001115, NM_133376, NM_003638, NM_001160259, NM_001160258, NM_001098482, NM_000844, NM_006272, NM_015321, NM_000916, NM_002211, NM_000810, NM_001145648, NM_001033582, NM_001033581, NM_001024660, NM_005438, NM_001165037, NM_015080, NM_001426, NM_006688, NM_001…	1519	211	15185	1.75298	0.99979	0.0435872	0.0195268
GO:0050679~positive regulation of epithelial cell proliferation	30	1.64835	0.00101573	NM_017617, NM_025069, NM_001003699, NM_000609, NM_001164680, NM_003392, NM_001003698, NM_001171624, NM_001114979, NM_001171625, NM_001171622, NM_001171623, NM_001077401, NM_014770, NM_001033756, NM_003152, NM_002165, NM_001114978, NM_001005862, NM_002020, NM_001142462, NM_002006, NM_178328, NM_000278, NM_178329, NM_000618, NM_053001, NM_003236, NM_001003700, NM_001099691, NM_001033886, NM_003990,…	1519	159	15185	1.88617	0.999847	0.04494	0.0202457
GO:0042221~response to chemical	428	23.5165	0.00102227	NM_001014433, NM_001145147, NM_001145146, NM_001014434, NM_025069, NM_004915, NM_001145148, NM_004210, NM_004348, NM_016943, NM_001122659, NM_032638, NM_176889, NM_017526, NM_001135648, NM_013302, NM_130843, NM_000278, NM_130842, NM_001146255, NM_000379, NM_002599, NM_006329, NM_013402, NM_005348, NM_001136031, NM_080872, NM_000384, NM_001146254, NM_007353, NM_001001960, NM_001033886, NM_000244, …	1519	3768	15185	1.13551	0.999855	0.0449928	0.0203748
GO:0061448~connective tissue development	39	2.14286	0.00103924	NM_017617, NM_153631, NM_153632, NM_153633, NM_018413, NM_001145102, NM_003392, NM_001754, NM_014620, NM_018848, NM_000230, NM_001077401, NM_004348, NM_002449, NM_001135254, NM_002345, NM_001128204, NM_001128205, NM_001128206, NM_007349, NM_001142462, NM_002006, NM_015170, NM_002318, NM_053001, NM_080681, NM_080680, NM_023111, NM_001145811, NM_080679, NM_024409, NM_005920, NM_001145819, NM_152989…	1519	227	15185	1.7175	0.999875	0.0454913	0.0207096
GO:0008038~neuron recognition	11	0.604396	0.00103976	NM_001136130, NM_018008, NM_175607, NM_016522, NM_020703, NM_005076, NM_022370, NM_175613, NM_014141, NM_016083, NM_000484, NM_018058, NM_201414, NM_201413, NM_001160226, NM_001144058, NM_001136129, NM_016580, NM_001160259, NM_001048209, NM_001160258, NM_001144059	1519	33	15185	3.33224	0.999875	0.0452842	0.0207198
GO:0051173~positive regulation of nitrogen compound metabolic process	205	11.2637	0.00105329	NM_001145147, NM_001145146, NM_213594, NM_002199, NM_017519, NM_001145148, NM_002586, NM_000602, NM_016655, NM_016654, NM_001077401, NM_004348, NM_015986, NM_003638, NM_001168325, NM_001130715, NM_005485, NM_003153, NM_001130716, NM_032638, NM_007349, NM_000514, NM_000278, NM_000518, NM_173164, NM_173165, NM_000618, NM_173163, NM_003743, NM_001130834, NM_001003931, NM_053001, NM_001168278, NM_153…	1519	1672	15185	1.22567	0.999889	0.0454028	0.0209867
GO:0032101~regulation of response to external stimulus	95	5.21978	0.00105927	NM_005091, NM_000165, NM_020441, NM_000905, NM_020530, NM_152309, NM_002203, NM_000609, NM_203472, NM_000602, NM_018848, NM_018309, NM_001171624, NM_001171625, NM_016083, NM_001171622, NM_001171623, NM_018708, NM_001122659, NM_002872, NM_006092, NM_001160259, NM_030974, NM_001160258, NM_002848, NM_001136191, NM_005535, NM_199440, NM_002006, NM_002599, NM_004093, NM_003998, NM_147204, NM_000283, N…	1519	689	15185	1.37836	0.999895	0.0454286	0.0211048
GO:0043269~regulation of ion transport	75	4.12088	0.0010608	NM_001145147, NM_000165, NM_003149, NM_001145146, NM_033272, NM_174934, NM_000801, NM_174936, NM_001145148, NM_172160, NM_172364, NM_000609, NM_016083, NM_001160259, NM_001160258, NM_001168325, NM_012152, NM_014555, NM_004770, NM_207396, NM_003740, NM_002667, NM_173162, NM_001167945, NM_001145648, NM_001127670, NM_054014, NM_001166176, NM_000719, NM_001166175, NM_004974, NM_001104631, NM_201597, …	1519	519	15185	1.44461	0.999896	0.0452681	0.0211349
GO:0043269~regulation of ion transport	75	4.12088	0.0010608	NM_001145147, NM_000165, NM_003149, NM_001145146, NM_033272, NM_174934, NM_000801, NM_174936, NM_001145148, NM_172160, NM_172364, NM_000609, NM_016083, NM_001160259, NM_001160258, NM_001168325, NM_012152, NM_014555, NM_004770, NM_207396, NM_003740, NM_002667, NM_173162, NM_001167945, NM_001145648, NM_001127670, NM_054014, NM_001166176, NM_000719, NM_001166175, NM_004974, NM_001104631, NM_201597, …	1519	519	15185	1.44461	0.999896	0.0452681	0.0211349
GO:0050769~positive regulation of neurogenesis	57	3.13187	0.00106628	NM_001922, NM_004210, NM_138559, NM_000609, NM_147223, NM_001171624, NM_001171625, NM_016083, NM_001171622, NM_001171623, NM_153348, NM_001098635, NM_001160259, NM_001160258, NM_012152, NM_032638, NM_013302, NM_015321, NM_003743, NM_001143806, NM_001166176, NM_001143805, NM_001166175, NM_198403, NM_002220, NM_001024660, NM_001033886, NM_001129889, NM_023110, NM_001127612, NM_005171, NM_006898, NM…	1519	370	15185	1.54003	0.999901	0.0452734	0.021243
GO:0007417~central nervous system development	114	6.26374	0.0011023	NM_001259, NM_000905, NM_213594, NM_001922, NM_199292, NM_004210, NM_199293, NM_172160, NM_000609, NM_147223, NM_018848, NM_175613, NM_001098635, NM_003638, NM_001033087, NM_030974, NM_001135254, NM_032638, NM_006272, NM_175747, NM_032531, NM_002006, NM_000278, NM_000916, NM_002211, NM_002107, NM_175607, NM_003743, NM_080676, NM_000810, NM_003551, NM_178232, NM_198309, NM_080872, NM_138576, NM_02…	1519	855	15185	1.33289	0.999927	0.0465389	0.0219531
GO:0006357~regulation of transcription from RNA polymerase II promoter	208	11.4286	0.00114971	NM_002199, NM_213594, NR_024549, NM_002586, NM_000602, NM_016655, NM_016654, NM_001077401, NM_004348, NM_001009994, NM_015986, NM_001122659, NM_003638, NM_003152, NM_014553, NM_001130715, NR_024550, NM_001136191, NM_003153, NM_001130716, NM_001128204, NM_032638, NM_001128205, NM_001128206, NM_007349, NM_000514, NM_152380, NM_000278, NM_173164, NM_173165, NM_000618, NM_173163, NM_003743, NM_014947…	1519	1701	15185	1.22241	0.999952	0.0482572	0.022887
GO:0006357~regulation of transcription from RNA polymerase II promoter	208	11.4286	0.00114971	NM_002199, NM_213594, NR_024549, NM_002586, NM_000602, NM_016655, NM_016654, NM_001077401, NM_004348, NM_001009994, NM_015986, NM_001122659, NM_003638, NM_003152, NM_014553, NM_001130715, NR_024550, NM_001136191, NM_003153, NM_001130716, NM_001128204, NM_032638, NM_001128205, NM_001128206, NM_007349, NM_000514, NM_152380, NM_000278, NM_173164, NM_173165, NM_000618, NM_173163, NM_003743, NM_014947…	1519	1701	15185	1.22241	0.999952	0.0482572	0.022887
GO:0086065~cell communication involved in cardiac conduction	13	0.714286	0.00119497	NM_000165, NM_004415, NM_001127493, NM_001167623, NM_001129829, NM_153485, NM_174934, NM_001167624, NM_152219, NM_152296, NM_001129843, NM_002230, NM_001129844, NM_001167625, NM_001129827, NM_001129846, NM_001129840, NM_001129842, NM_001129841, NM_001232, NM_020977, NM_021991, NM_207396, NM_001142348, NM_001129834, NM_001008844, NM_001129835, NM_001129832, NM_001167945, NM_001148, NM_001129833, N…	1519	45	15185	2.88794	0.999967	0.0498676	0.0237776
GO:0010631~epithelial cell migration	38	2.08791	0.0011983	NM_020441, NM_017617, NM_001003699, NM_002203, NM_001170717, NM_003392, NM_001170718, NM_001170715, NM_001170716, NM_001003698, NM_001170714, NM_002845, NM_001171624, NM_001171625, NM_001171622, NM_001077401, NM_001170720, NM_001171623, NM_002387, NM_001105244, NM_133376, NM_001033756, NM_003152, NM_002165, NM_001018070, NM_058176, NM_024940, NM_058177, NM_002020, NM_007349, NM_002006, NM_002211,…	1519	221	15185	1.71889	0.999968	0.0497631	0.0238431
GO:0090130~tissue migration	39	2.14286	0.0012273	NM_020441, NM_017617, NM_001003699, NM_002203, NM_001170717, NM_003392, NM_001170718, NM_001170715, NM_001170716, NM_001003698, NM_001170714, NM_002845, NM_001171624, NM_001171625, NM_001171622, NM_001077401, NM_001170720, NM_001171623, NM_002387, NM_001105244, NM_133376, NM_001033756, NM_003152, NM_002165, NM_001018070, NM_058176, NM_024940, NM_058177, NM_002020, NM_007349, NM_002006, NM_002211,…	1519	229	15185	1.7025	0.999975	0.0506936	0.0244134
GO:0045935~positive regulation of nucleobase-containing compound metabolic process	194	10.6593	0.00125151	NM_001145147, NM_001145146, NM_213594, NM_002199, NM_017519, NM_001145148, NM_002586, NM_000602, NM_016655, NM_016654, NM_001077401, NM_004348, NM_015986, NM_003638, NM_001168325, NM_001130715, NM_005485, NM_003153, NM_001130716, NM_032638, NM_007349, NM_000514, NM_000278, NM_173164, NM_173165, NM_000618, NM_173163, NM_003743, NM_001130834, NM_001003931, NM_053001, NM_001168278, NM_153453, NM_198…	1519	1576	15185	1.23056	0.99998	0.0514226	0.0248893
GO:0048568~embryonic organ development	61	3.35165	0.00129448	NM_000165, NM_153631, NM_199292, NM_153632, NM_199293, NM_153633, NM_147223, NM_014620, NM_018848, NM_001171624, NM_001171625, NM_001171622, NM_001171623, NM_153348, NM_004348, NM_002403, NM_003638, NM_014213, NM_016087, NM_032638, NM_017459, NM_152380, NM_000278, NM_003743, NM_053001, NM_001166176, NM_001166175, NM_198392, NM_001042692, NM_001127180, NM_023110, NM_005568, NM_001127612, NM_032784…	1519	406	15185	1.50197	0.999986	0.0528906	0.0257333
GO:0010594~regulation of endothelial cell migration	23	1.26374	0.00131254	NM_017617, NM_003392, NM_001170717, NM_001170718, NM_001170715, NM_001170716, NM_001170714, NM_002845, NM_001171624, NM_001171625, NM_001171622, NM_001077401, NM_001170720, NM_001171623, NM_001105244, NM_001033756, NM_003152, NM_058176, NM_058177, NM_002020, NM_002006, NM_015278, NM_023111, NM_006164, NM_032777, NM_014707, NM_133468, NM_023110, NM_003376, NM_001320, NM_004040, NM_032682, NM_02310…	1519	111	15185	2.07139	0.999988	0.0533569	0.0260879
GO:0050804~modulation of synaptic transmission	44	2.41758	0.00132042	NM_001144382, NM_001114183, NM_004210, NM_003490, NM_012309, NM_175613, NM_003285, NM_000841, NM_016083, NM_022572, NM_001079823, NM_014718, NM_001160259, NM_001135774, NM_001160258, NM_000845, NM_020180, NM_001098482, NM_000844, NM_000743, NM_000910, NM_006272, NM_000514, NM_015321, NM_000916, NM_001081560, NM_001081562, NM_001081563, NM_175607, NM_001145648, NM_001040429, NM_001033582, NM_00103…	1519	269	15185	1.63515	0.999989	0.0534176	0.0262425
GO:0010658~striated muscle cell apoptotic process	11	0.604396	0.00134271	NM_005526, NM_001168298, NM_021135, NM_004387, NM_004281, NM_001017963, NM_172115, NM_172114, NM_001146313, NM_001146312, NM_001145412, NM_001145413, NM_153604, NM_001006932, NM_021973, NM_001166176, NM_005348, NM_172129, NM_001166175, NM_006164, NM_172128, NM_013962, NM_172127, NM_001221, NM_001557	1519	34	15185	3.23423	0.999991	0.0540421	0.0266797
GO:0051271~negative regulation of cellular component movement	41	2.25275	0.00137873	NM_020441, NM_017617, NM_012301, NM_000609, NM_003392, NM_021962, NM_000602, NM_002845, NM_002844, NM_001112, NM_001077401, NM_001165413, NM_002387, NM_001105244, NM_001018070, NM_133177, NM_002848, NM_133178, NM_001128204, NM_001128205, NM_020398, NM_001128206, NM_002006, NM_001135648, NM_001033117, NM_015170, NM_201277, NM_003243, NM_006164, NM_013962, NM_020762, NM_001159746, NM_001033886, NM_…	1519	246	15185	1.66612	0.999993	0.0551953	0.027386
GO:0090132~epithelium migration	38	2.08791	0.00141539	NM_020441, NM_017617, NM_001003699, NM_002203, NM_001170717, NM_003392, NM_001170718, NM_001170715, NM_001170716, NM_001003698, NM_001170714, NM_002845, NM_001171624, NM_001171625, NM_001171622, NM_001077401, NM_001170720, NM_001171623, NM_002387, NM_001105244, NM_133376, NM_001033756, NM_003152, NM_002165, NM_001018070, NM_058176, NM_024940, NM_058177, NM_002020, NM_007349, NM_002006, NM_002211,…	1519	223	15185	1.70347	0.999995	0.0563609	0.0281044
GO:0060322~head development	93	5.10989	0.00141904	NM_001259, NM_000905, NM_213594, NM_199292, NM_001922, NM_199293, NM_004210, NM_172160, NM_000609, NM_147223, NM_018848, NM_175613, NM_001098635, NM_003638, NM_001033087, NM_030974, NM_032638, NM_002006, NM_032531, NM_000916, NM_000278, NM_002211, NM_002107, NM_000810, NM_003743, NM_080676, NM_175607, NM_053001, NM_003551, NM_198309, NM_138576, NM_024876, NM_001165037, NM_004574, NM_001142555, NM…	1519	678	15185	1.37123	0.999995	0.0562435	0.028176
GO:0050878~regulation of body fluid levels	68	3.73626	0.00146238	NM_000165, NM_002199, NM_004210, NM_002203, NM_147223, NM_000602, NM_001171624, NM_020733, NM_001114979, NM_001171625, NM_001171622, NM_001171623, NM_002876, NM_001122659, NM_002872, NM_003152, NM_001077504, NM_001077505, NM_000908, NM_001077503, NM_002848, NM_001114978, NM_001077506, NM_032638, NM_000916, NM_000518, NM_001015880, NM_002107, NM_004670, NM_003743, NM_000379, NM_001077261, NM_05821…	1519	466	15185	1.45875	0.999997	0.057648	0.0290246
GO:0044763~single-organism cellular process	1171	64.3407	0.0014659	NM_005091, NM_001145147, NM_001014434, NM_001145146, NM_145330, NM_004211, NM_001922, NM_004210, NM_001145148, NM_138375, NM_002587, NM_002590, NM_001122659, NM_004204, NM_004207, NM_005485, NM_001130715, NM_001130716, NM_001135648, NM_032531, NM_130843, NM_130842, NM_173164, NM_001008844, NM_173165, NM_001076552, NM_173162, NM_080676, NM_173163, NM_001003931, NM_002599, NM_058216, NM_207322, NM_…	1519	11221	15185	1.04324	0.999997	0.0575206	0.0290934
GO:0010659~cardiac muscle cell apoptotic process	10	0.549451	0.00152791	NM_021973, NM_001006932, NM_153604, NM_001168298, NM_005526, NM_005348, NM_001166176, NM_001166175, NM_004387, NM_021135, NM_172129, NM_001017963, NM_006164, NM_013962, NM_172128, NM_172115, NM_172114, NM_172127, NM_001146313, NM_001146312, NM_001221, NM_001557, NM_001145412, NM_001145413	1519	29	15185	3.44714	0.999998	0.0596112	0.0303062
GO:0071625~vocalization behavior	6	0.32967	0.00162491	NM_024729, NM_014141, NM_014618, NM_001145809, NM_138732, NM_012309, NM_001077186, NM_001080420, NM_015080	1519	10	15185	5.99803	0.999599	0.580608	0.0303511
GO:0071625~vocalization behavior	6	0.32967	0.00162491	NM_024729, NM_014141, NM_014618, NM_001145809, NM_138732, NM_012309, NM_001077186, NM_001080420, NM_015080	1519	10	15185	5.99803	0.999599	0.580608	0.0303511
GO:0061045~negative regulation of wound healing	6	0.32967	0.00162491	NM_000165, NM_133493, NM_001165413, NM_002006, NM_005902, NM_001145102, NM_001639, NM_000602, NM_001159587, NM_001159588	1519	10	15185	5.99803	0.999599	0.580608	0.0303511
GO:0010762~regulation of fibroblast migration	6	0.32967	0.00162491	NM_057178, NM_014325, NM_001136204, NM_007353, NM_018715, NM_015910, NM_005246, NM_001042692	1519	10	15185	5.99803	0.999599	0.580608	0.0303511
GO:1904062~regulation of cation transmembrane transport	35	1.92308	0.00154998	NM_001145147, NM_002350, NM_001025356, NM_001145146, NM_003149, NM_001129829, NM_003304, NM_001142680, NM_174934, NM_000801, NM_001145148, NM_174936, NM_172160, NM_001129827, NM_002064, NM_172115, NM_172114, NM_005109, NM_001168325, NM_020977, NM_207396, NM_002667, NM_001167945, NM_001127670, NM_054014, NM_000719, NM_001111097, NM_172129, NM_004832, NM_172128, NM_172127, NM_001104631, NM_201572, …	1519	201	15185	1.74072	0.999998	0.0601749	0.0307374
GO:1904062~regulation of cation transmembrane transport	35	1.92308	0.00154998	NM_001145147, NM_002350, NM_001025356, NM_001145146, NM_003149, NM_001129829, NM_003304, NM_001142680, NM_174934, NM_000801, NM_001145148, NM_174936, NM_172160, NM_001129827, NM_002064, NM_172115, NM_172114, NM_005109, NM_001168325, NM_020977, NM_207396, NM_002667, NM_001167945, NM_001127670, NM_054014, NM_000719, NM_001111097, NM_172129, NM_004832, NM_172128, NM_172127, NM_001104631, NM_201572, …	1519	201	15185	1.74072	0.999998	0.0601749	0.0307374
GO:0032332~positive regulation of chondrocyte differentiation	8	0.43956	0.00167942	NM_033326, NM_001024630, NM_001145102, NM_017508, NM_002318, NM_005523, NM_000020, NM_001077401, NM_001145811, NM_004348, NM_001203, NM_001015051, NM_005902, NM_001145819, NM_152989	1519	19	15185	4.20914	0.999691	0.520413	0.031354
GO:2000147~positive regulation of cell motility	59	3.24176	0.00159732	NM_025069, NM_001343, NM_002203, NM_000609, NM_000602, NM_001077710, NM_002205, NM_001171624, NM_001171625, NM_001171622, NM_001171623, NM_002872, NM_003152, NM_058176, NM_058177, NM_002020, NM_002006, NM_000618, NM_147204, NM_001003700, NM_001033886, NM_023110, NM_001031702, NM_004040, NM_007074, NM_001111285, NM_002527, NM_001111283, NM_000594, NM_023108, NM_199168, NM_023105, NM_000963, NM_006…	1519	393	15185	1.50078	0.999999	0.0616797	0.031662
GO:0035295~tube development	79	4.34066	0.00161655	NM_000165, NM_018848, NM_001142546, NM_001171624, NM_020733, NM_001114979, NM_001171625, NM_001171622, NM_001077401, NM_001171623, NM_001122659, NM_033267, NM_001114978, NM_001135254, NM_002020, NM_032638, NM_033631, NM_000514, NM_002317, NM_002006, NM_000916, NM_000278, NM_001127605, NM_001166176, NM_001168278, NM_004093, NM_001166175, NM_198392, NM_198309, NM_014244, NM_023110, NM_005568, NM_00…	1519	561	15185	1.40774	0.999999	0.0621221	0.0320373
GO:0030048~actin filament-based movement	25	1.37363	0.00161762	NM_000165, NM_001129829, NM_153485, NM_174934, NM_001129827, NM_133432, NM_024729, NM_133378, NM_133437, NM_172115, NM_172114, NM_001077186, NM_020977, NM_021991, NM_001145809, NM_003290, NM_207396, NM_002667, NM_001008844, NM_001167945, NM_001127670, NM_000719, NM_004298, NM_172129, NM_002052, NM_172128, NM_172127, NM_001104631, NM_201572, NM_001221, NM_201597, NM_201571, NM_001127180, NM_004415…	1519	127	15185	1.96786	0.999999	0.0618869	0.0320581
GO:0010880~regulation of release of sequestered calcium ion into cytosol by sarcoplasmic reticulum	9	0.494505	0.00166372	NM_001127493, NM_001129829, NM_001167623, NM_001167624, NM_001129843, NM_001129844, NM_001167625, NM_001129827, NM_001129846, NM_001129840, NM_172115, NM_001129842, NM_172114, NM_001129841, NM_001232, NM_003130, NM_198901, NM_020977, NM_001165899, NM_001129834, NM_002667, NM_001129835, NM_001129832, NM_001148, NM_001129833, NM_001743, NM_199460, NM_001129838, NM_001129839, NM_001129836, NM_000719…	1519	24	15185	3.74877	0.999999	0.063315	0.0329573
GO:0010880~regulation of release of sequestered calcium ion into cytosol by sarcoplasmic reticulum	9	0.494505	0.00166372	NM_001127493, NM_001129829, NM_001167623, NM_001167624, NM_001129843, NM_001129844, NM_001167625, NM_001129827, NM_001129846, NM_001129840, NM_172115, NM_001129842, NM_172114, NM_001129841, NM_001232, NM_003130, NM_198901, NM_020977, NM_001165899, NM_001129834, NM_002667, NM_001129835, NM_001129832, NM_001148, NM_001129833, NM_001743, NM_199460, NM_001129838, NM_001129839, NM_001129836, NM_000719…	1519	24	15185	3.74877	0.999999	0.063315	0.0329573
GO:0032332~positive regulation of chondrocyte differentiation	8	0.43956	0.00167942	NM_033326, NM_001024630, NM_001145102, NM_017508, NM_002318, NM_005523, NM_000020, NM_001077401, NM_001145811, NM_004348, NM_001203, NM_001015051, NM_005902, NM_001145819, NM_152989	1519	19	15185	4.20914	1	0.063614	0.0332634
GO:0030534~adult behavior	26	1.42857	0.00175724	NM_025213, NM_001426, NM_000905, NM_001136130, NM_152296, NM_000609, NM_000663, NM_012309, NM_005076, NM_000230, NM_201414, NM_201413, NM_001166694, NM_003947, NM_001098635, NM_199168, NM_021080, NM_014213, NM_000844, NM_000743, NM_000514, NM_004171, NM_007327, NM_138732, NM_152744, NM_001040429, NM_004408, NM_020971, NM_000832, NM_014141, NM_178860, NM_000484, NM_021569, NM_001024660, NM_020686,…	1519	135	15185	1.92529	1	0.0661746	0.0347789
GO:0048562~embryonic organ morphogenesis	45	2.47253	0.00177578	NM_000165, NM_017617, NM_153631, NM_199292, NM_153632, NM_199293, NM_153633, NM_018413, NM_001145102, NM_003392, NM_021962, NM_014620, NM_018848, NM_173849, NM_004348, NM_002403, NM_003638, NM_015662, NM_014213, NM_016087, NM_032638, NM_017459, NM_152380, NM_001142462, NM_000278, NM_053001, NM_001166176, NM_198392, NM_001166175, NM_023111, NM_002052, NM_001159746, NM_003502, NM_001042692, NM_0011…	1519	281	15185	1.6009	1	0.06656	0.0351397
GO:0002067~glandular epithelial cell differentiation	13	0.714286	0.00179973	NM_001259, NM_000209, NM_000244, NM_017617, NM_001127612, NM_001145306, NM_003392, NM_032682, NM_001114979, NM_000965, NM_019102, NM_130800, NM_130801, NM_130802, NM_130803, NM_130804, NM_001114978, NM_130799, NM_001114980, NM_001114981, NM_002006, NM_003722, NM_016152, NM_001200, NM_004316, NM_001114982	1519	47	15185	2.76505	1	0.0671368	0.0356054
GO:0060537~muscle tissue development	54	2.96703	0.00180779	NM_000165, NM_000801, NM_004210, NM_172160, NM_147147, NM_133432, NM_001171624, NM_024729, NM_020733, NM_001114979, NM_001171625, NM_001171622, NM_001171623, NM_133437, NM_003638, NM_006738, NM_014213, NM_058176, NM_001077186, NM_001114978, NM_058177, NM_001135254, NM_006272, NM_021069, NM_002006, NM_002211, NM_002667, NM_001008844, NM_000618, NM_054014, NM_001166176, NM_153453, NM_004093, NM_001…	1519	354	15185	1.52492	1	0.0671382	0.0357623
GO:0050789~regulation of biological process	1044	57.3626	0.00182052	NM_005091, NM_001145147, NM_001014434, NM_001145146, NM_001922, NM_004210, NM_001145148, NM_138375, NM_002586, NM_001122659, NM_005485, NM_001130715, NM_001130716, NM_001135648, NM_130843, NM_130842, NM_032534, NM_173164, NM_001008844, NM_173165, NM_173162, NM_173163, NM_001003931, NM_002599, NM_058216, NM_001136031, NM_207322, NM_005498, NM_173159, NM_005456, NM_001135610, NM_005076, NM_005781, …	1519	9920	15185	1.05207	1	0.0673062	0.0360097
GO:0050789~regulation of biological process	1044	57.3626	0.00182052	NM_005091, NM_001145147, NM_001014434, NM_001145146, NM_001922, NM_004210, NM_001145148, NM_138375, NM_002586, NM_001122659, NM_005485, NM_001130715, NM_001130716, NM_001135648, NM_130843, NM_130842, NM_032534, NM_173164, NM_001008844, NM_173165, NM_173162, NM_173163, NM_001003931, NM_002599, NM_058216, NM_001136031, NM_207322, NM_005498, NM_173159, NM_005456, NM_001135610, NM_005076, NM_005781, …	1519	9920	15185	1.05207	1	0.0673062	0.0360097
GO:0043087~regulation of GTPase activity	88	4.83516	0.00184897	NM_144707, NM_014629, NM_014957, NM_001010927, NM_020343, NM_017707, NM_015432, NM_147147, NM_018848, NM_001129731, NM_001025598, NM_001165977, NM_001165978, NM_001143778, NM_001494, NM_006738, NM_139316, NM_012454, NM_002847, NM_001135191, NM_001113361, NM_000514, NM_001025201, NM_001268, NM_198517, NM_002006, NM_130843, NM_130842, NM_001010938, NM_002211, NM_019020, NM_001145648, NM_006869, NM_…	1519	641	15185	1.3724	1	0.0680317	0.0365626
GO:0051272~positive regulation of cellular component movement	60	3.2967	0.00187325	NM_025069, NM_001343, NM_002203, NM_000609, NM_000602, NM_001077710, NM_002205, NM_001171624, NM_001171625, NM_001171622, NM_001171623, NM_002872, NM_003152, NM_058176, NM_058177, NM_002020, NM_002006, NM_207396, NM_000618, NM_147204, NM_001003700, NM_001033886, NM_023110, NM_001031702, NM_004040, NM_007074, NM_001111285, NM_002527, NM_001111283, NM_000594, NM_023108, NM_199168, NM_023105, NM_000…	1519	404	15185	1.48466	1	0.0686028	0.0370341
GO:0030155~regulation of cell adhesion	84	4.61538	0.00189891	NM_001259, NM_025069, NM_001006943, NM_002119, NM_002203, NM_000609, NM_000602, NM_002290, NM_002205, NM_001171624, NM_001105206, NM_001171625, NM_001171622, NM_001077401, NM_001171623, NM_001105209, NM_001105208, NM_001105207, NM_002872, NM_002848, NM_001168325, NM_000910, NM_005535, NM_199440, NM_020526, NM_000618, NM_005204, NM_004093, NM_005929, NM_001143886, NM_147204, NM_001143885, NM_00116…	1519	607	15185	1.3834	1	0.0692171	0.0375322
GO:0030335~positive regulation of cell migration	57	3.13187	0.00196267	NM_025069, NM_001343, NM_002203, NM_000609, NM_000602, NM_001077710, NM_002205, NM_001171624, NM_001171625, NM_001171622, NM_001171623, NM_002872, NM_003152, NM_058176, NM_058177, NM_002020, NM_002006, NM_000618, NM_147204, NM_001003700, NM_001033886, NM_023110, NM_001031702, NM_004040, NM_007074, NM_001111285, NM_002527, NM_001111283, NM_000594, NM_023108, NM_199168, NM_023105, NM_000963, NM_006…	1519	380	15185	1.49951	1	0.0711591	0.038769
GO:0003015~heart process	39	2.14286	0.00198128	NM_000165, NM_174934, NM_152219, NM_172364, NM_147147, NM_133432, NM_133437, NM_006738, NM_001006932, NM_021991, NM_207396, NM_002667, NM_001008844, NM_001167945, NM_001127670, NM_001166176, NM_005348, NM_000719, NM_001166175, NM_004298, NM_033437, NM_024409, NM_001104631, NM_201597, NM_001083, NM_001127493, NM_000620, NM_007073, NM_021135, NM_000432, NM_003130, NM_001165899, NM_001048230, NM_001…	1519	235	15185	1.65903	1	0.0715101	0.0391296
GO:0008219~cell death	220	12.0879	0.00201074	NM_004210, NM_005338, NM_001007232, NM_001122659, NM_001130715, NM_001130716, NM_013302, NM_000278, NM_000379, NM_005348, NM_001136031, NM_080872, NM_001165037, NM_001033886, NM_005456, NM_007074, NM_000104, NM_001145412, NM_005460, NM_001145413, NM_007327, NM_138929, NM_006305, NM_001707, NM_005066, NM_001200, NM_000115, NM_001203, NM_001042428, NM_001042425, NM_002350, NM_017617, NM_001759, NM_…	1519	1832	15185	1.20048	1	0.0722336	0.0397001
GO:0031589~cell-substrate adhesion	7	0.384615	0.00223209	NM_000552, NM_133376, NM_002211, NM_002203, NM_000212, NM_004441, NM_002205, NM_007074	1519	15	15185	4.66513	0.999978	0.535864	0.0414667
GO:0045807~positive regulation of endocytosis	22	1.20879	0.00213941	NM_001025356, NM_012301, NM_001142680, NM_001343, NM_174936, NM_002203, NM_003392, NM_021962, NM_005338, NM_000602, NM_001171624, NM_001171625, NM_001171622, NM_001171623, NM_001165413, NM_001033756, NM_032638, NM_153498, NM_145182, NM_013302, NM_020397, NM_013258, NM_015627, NM_001159746, NM_003376, NM_002140, NM_002527, NM_000101, NM_000594, NM_001025370, NM_003322, NM_001025369, NM_001092, NM_…	1519	108	15185	2.03637	1	0.076363	0.0421891
GO:0045807~positive regulation of endocytosis	22	1.20879	0.00213941	NM_001025356, NM_012301, NM_001142680, NM_001343, NM_174936, NM_002203, NM_003392, NM_021962, NM_005338, NM_000602, NM_001171624, NM_001171625, NM_001171622, NM_001171623, NM_001165413, NM_001033756, NM_032638, NM_153498, NM_145182, NM_013302, NM_020397, NM_013258, NM_015627, NM_001159746, NM_003376, NM_002140, NM_002527, NM_000101, NM_000594, NM_001025370, NM_003322, NM_001025369, NM_001092, NM_…	1519	108	15185	2.03637	1	0.076363	0.0421891
GO:0007420~brain development	88	4.83516	0.00215653	NM_001259, NM_000905, NM_213594, NM_199292, NM_001922, NM_199293, NM_004210, NM_172160, NM_000609, NM_147223, NM_018848, NM_175613, NM_001098635, NM_003638, NM_001033087, NM_030974, NM_032638, NM_002006, NM_032531, NM_000916, NM_000278, NM_002211, NM_002107, NM_000810, NM_003743, NM_080676, NM_175607, NM_003551, NM_198309, NM_138576, NM_024876, NM_001165037, NM_004574, NM_001142555, NM_001033886,…	1519	644	15185	1.36601	1	0.0766346	0.0425197
GO:0086026~atrial cardiac muscle cell to AV node cell signaling	7	0.384615	0.00223209	NM_000165, NM_001127493, NM_001129829, NM_001167623, NM_153485, NM_001167624, NM_001129843, NM_001129844, NM_001129827, NM_001167625, NM_001129846, NM_001129840, NM_001129842, NM_001129841, NM_020977, NM_207396, NM_001129834, NM_001129835, NM_001129832, NM_001148, NM_001167945, NM_001129833, NM_199460, NM_001129838, NM_001129839, NM_001129836, NM_000719, NM_001129837, NM_004298, NM_002239, NM_001…	1519	15	15185	4.66513	1	0.0788897	0.0439778
GO:0086014~atrial cardiac muscle cell action potential	7	0.384615	0.00223209	NM_000165, NM_001127493, NM_001129829, NM_001167623, NM_153485, NM_001167624, NM_001129843, NM_001129844, NM_001129827, NM_001167625, NM_001129846, NM_001129840, NM_001129842, NM_001129841, NM_020977, NM_207396, NM_001129834, NM_001129835, NM_001129832, NM_001148, NM_001167945, NM_001129833, NM_199460, NM_001129838, NM_001129839, NM_001129836, NM_000719, NM_001129837, NM_004298, NM_002239, NM_001…	1519	15	15185	4.66513	1	0.0788897	0.0439778
GO:0060314~regulation of ryanodine-sensitive calcium-release channel activity	9	0.494505	0.00223479	NM_001165899, NM_000620, NM_000801, NM_002667, NM_001743, NM_054014, NM_172129, NM_004832, NM_172128, NM_172115, NM_172114, NM_172127, NM_001232, NM_001104631, NM_003130, NM_001221, NM_198901	1519	25	15185	3.59882	1	0.0786604	0.04403
GO:0006366~transcription from RNA polymerase II promoter	205	11.2637	0.00227184	NM_002199, NM_213594, NM_002586, NM_000602, NM_016655, NM_016654, NM_001077401, NM_004348, NM_001009994, NM_015986, NM_001122659, NM_003638, NM_014553, NM_001130715, NM_001136191, NM_003153, NM_001130716, NM_001128204, NM_032638, NM_001128205, NM_001025204, NM_001128206, NM_007349, NM_000514, NM_152380, NM_001025203, NM_000278, NM_173164, NM_173165, NM_000618, NM_173163, NM_003743, NM_001130834, …	1519	1698	15185	1.20691	1	0.0795889	0.0447442
GO:0006366~transcription from RNA polymerase II promoter	205	11.2637	0.00227184	NM_002199, NM_213594, NM_002586, NM_000602, NM_016655, NM_016654, NM_001077401, NM_004348, NM_001009994, NM_015986, NM_001122659, NM_003638, NM_014553, NM_001130715, NM_001136191, NM_003153, NM_001130716, NM_001128204, NM_032638, NM_001128205, NM_001025204, NM_001128206, NM_007349, NM_000514, NM_152380, NM_001025203, NM_000278, NM_173164, NM_173165, NM_000618, NM_173163, NM_003743, NM_001130834, …	1519	1698	15185	1.20691	1	0.0795889	0.0447442
GO:0040013~negative regulation of locomotion	40	2.1978	0.00232778	NM_020441, NM_017617, NM_012301, NM_003392, NM_000609, NM_021962, NM_000602, NM_002845, NM_002844, NM_001112, NM_001077401, NM_001165413, NM_002387, NM_001105244, NM_001018070, NM_133177, NM_002848, NM_133178, NM_001128204, NM_001128205, NM_020398, NM_001128206, NM_002006, NM_001135648, NM_001033117, NM_015170, NM_201277, NM_006164, NM_013962, NM_020762, NM_001159746, NM_001033886, NM_000825, NR_…	1519	245	15185	1.63212	1	0.0811407	0.0458215

## Sheet: AA-DVP GO terms
Term	Count	%	PValue	Genes	List Total	Pop Hits	Pop Total	Fold Enrichment	Bonferroni	Benjamini	FDR
GO:0044707~single-multicellular organism process	271	40.2077	1.08e-08	NM_182932, NM_001014434, NM_213594, NM_004350, NM_002387, NM_001136022, NM_006346, NM_001136021, NM_006203, NM_017521, NM_032638, NM_032531, NM_016135, NM_001725, NM_005348, NM_024736, NM_001033886, NM_148919, NM_001127511, NM_021599, NM_001127216, NM_139211, NM_012418, NM_139212, NM_001127510, NM_006225, NM_134269, NM_006497, NM_182964, NM_006209, NM_001702, NM_058240, NM_005069, NM_001706, NM_0…	564	5549	15185	1.31489	6.3e-05	6.3e-05	2.09e-07
GO:0007155~cell adhesion	104	15.4303	1.63e-08	NM_002305, NR_024043, NM_002209, NM_001161586, NM_001004196, NM_006113, NM_002116, NM_000609, NM_003247, NM_033131, NM_003736, NM_000582, NM_002308, NM_003246, NM_003534, NM_003533, NM_003531, NM_000885, NM_009587, NM_005010, NM_058174, NM_058175, NM_001004019, NM_000610, NM_001144769, NM_001145645, NM_199328, NM_032531, NM_005086, NM_001114380, NM_020356, NM_014634, NM_144779, NM_018915, NM_0141…	564	1609	15185	1.74026	9.5e-05	4.75e-05	3.15e-07
GO:0022610~biological adhesion	104	15.4303	1.93e-08	NM_002305, NR_024043, NM_002209, NM_001161586, NM_001004196, NM_006113, NM_002116, NM_000609, NM_003247, NM_033131, NM_003736, NM_000582, NM_002308, NM_003246, NM_003534, NM_003533, NM_003531, NM_000885, NM_009587, NM_005010, NM_058174, NM_058175, NM_001004019, NM_000610, NM_001144769, NM_001145645, NM_199328, NM_032531, NM_005086, NM_001114380, NM_020356, NM_014634, NM_144779, NM_018915, NM_0141…	564	1614	15185	1.73486	0.000112922	3.76e-05	3.74e-07
GO:0048731~system development	209	31.0089	2.21e-08	NM_001077182, NM_001014434, NM_182932, NR_024043, NM_001001557, NM_213594, NM_206862, NM_000609, NM_206860, NM_004350, NM_003247, NM_003540, NM_206861, NM_003246, NM_006194, NM_001136022, NM_003152, NM_003636, NM_000885, NM_009587, NM_001160259, NM_001160258, NM_017521, NM_001002919, NM_032638, NM_000610, NM_032531, NM_016135, NM_001130834, NM_053001, NM_003235, NM_005348, NM_006871, NM_000799, N…	564	4029	15185	1.39664	0.000128953	3.22e-05	4.27e-07
GO:0048856~anatomical structure development	251	37.2404	5.67e-08	NM_182932, NM_001014434, NM_213594, NM_004350, NM_006346, NM_001136022, NM_001136021, NM_006203, NM_017521, NM_032638, NM_001145645, NM_198517, NM_032531, NM_016135, NM_000275, NM_005348, NM_001033886, NM_148919, NM_001127511, NM_021599, NM_001127216, NM_012418, NM_139211, NM_139212, NM_001127510, NM_006225, NM_134269, NM_006497, NM_182964, NM_006209, NM_001702, NM_058240, NM_005069, NM_001706, N…	564	5124	15185	1.31886	0.000330848	6.62e-05	1.1e-06
GO:0007275~multicellular organism development	227	33.6795	1.36e-07	NM_182932, NM_001014434, NM_213594, NM_004350, NM_001136022, NM_017521, NM_032638, NM_032531, NM_016135, NM_005348, NM_001033886, NM_148919, NM_001127511, NM_021599, NM_001127216, NM_012418, NM_139211, NM_139212, NM_001127510, NM_006225, NM_134269, NM_006497, NM_182964, NM_006209, NM_001702, NM_005069, NM_058240, NM_001706, NM_006492, NM_006312, NM_005475, NM_001093771, NM_134270, NM_004310, NM_0…	564	4565	15185	1.33882	0.000793702	0.000132327	2.63e-06
GO:0032502~developmental process	254	37.6855	1.93e-07	NM_182932, NM_001014434, NM_213594, NM_004350, NM_001136022, NM_006346, NM_001136021, NM_006203, NM_017521, NM_032638, NM_001145645, NM_198517, NM_032531, NM_016135, NM_000275, NM_005348, NM_001033886, NM_148919, NM_001127511, NM_021599, NM_001127216, NM_012418, NM_139211, NM_139212, NM_001127510, NM_006225, NM_134269, NM_006497, NM_182964, NM_006209, NM_001702, NM_058240, NM_005069, NM_001706, N…	564	5267	15185	1.29839	0.00112573	0.000160897	3.73e-06
GO:0048513~animal organ development	157	23.2938	7.03e-07	NM_001077182, NM_182932, NM_001014434, NR_024043, NM_213594, NM_001001557, NM_000609, NM_206862, NM_003540, NM_004350, NM_206860, NM_206861, NM_006194, NM_001136022, NM_003152, NM_000885, NM_003636, NM_009587, NM_032638, NM_000610, NM_032531, NM_016135, NM_001130834, NM_003235, NM_053001, NM_006871, NM_147164, NM_000799, NM_152989, NM_001033886, NM_023110, NM_006997, NM_148919, NM_003126, NM_0027…	564	2945	15185	1.43532	0.00409575	0.000512888	1.36e-05
GO:0044767~single-organism developmental process	245	36.3501	8.58e-07	NM_182932, NM_001014434, NM_213594, NM_004350, NM_006346, NM_001136022, NM_001136021, NM_006203, NM_017521, NM_032638, NM_198517, NM_032531, NM_016135, NM_000275, NM_005348, NM_001033886, NM_148919, NM_001127511, NM_021599, NM_001127216, NM_012418, NM_139211, NM_139212, NM_001127510, NM_006225, NM_134269, NM_006497, NM_182964, NM_006209, NM_001702, NM_058240, NM_005069, NM_001706, NM_006492, NM_0…	564	5122	15185	1.28784	0.00499833	0.000556608	1.66e-05
GO:0023052~signaling	265	39.3175	1.84e-06	NM_182932, NM_213594, NM_080865, NM_002387, NM_016463, NM_001136022, NM_006346, NM_001136021, NM_006203, NM_032638, NM_001145645, NM_198517, NM_130843, NM_130842, NM_005348, NM_207322, NM_001033886, NM_005072, NM_148919, NM_001127511, NM_013416, NM_032641, NM_001127216, NM_001134366, NM_001127510, NM_006225, NM_080797, NM_006497, NM_006209, NM_001702, NM_001145961, NM_058240, NM_001706, NM_001145…	564	5683	15185	1.25546	0.0106826	0.00107343	3.56e-05
GO:0009893~positive regulation of metabolic process	152	22.5519	1.95e-06	NR_024043, NM_213594, NM_001001557, NM_003540, NM_004350, NM_003246, NM_003534, NM_003533, NM_006194, NM_147156, NM_003531, NM_001136022, NM_006346, NM_001136021, NM_003151, NM_009587, NM_001002919, NM_017521, NM_032638, NM_000610, NM_014945, NM_001130834, NM_053001, NM_003745, NM_005348, NM_006871, NM_000799, NM_000797, NM_001012614, NM_023110, NM_148919, NM_172349, NM_001127511, NM_002796, NM_0…	564	2875	15185	1.42345	0.0113525	0.00103741	3.78e-05
GO:0044700~single organism signaling	263	39.0208	2.09e-06	NM_182932, NM_213594, NM_080865, NM_002387, NM_016463, NM_001136022, NM_006346, NM_001136021, NM_006203, NM_032638, NM_001145645, NM_198517, NM_130843, NM_130842, NM_005348, NM_207322, NM_001033886, NM_005072, NM_148919, NM_001127511, NM_013416, NM_032641, NM_001127216, NM_001134366, NM_001127510, NM_006225, NM_080797, NM_006497, NM_006209, NM_001702, NM_001145961, NM_058240, NM_001706, NM_001145…	564	5639	15185	1.25571	0.0121253	0.0010161	4.04e-05
GO:0010604~positive regulation of macromolecule metabolic process	144	21.365	2.48e-06	NR_024043, NM_001001557, NM_213594, NM_003540, NM_004350, NM_003246, NM_003534, NM_003533, NM_006194, NM_147156, NM_003531, NM_006346, NM_001136022, NM_001136021, NM_003151, NM_009587, NM_017521, NM_001002919, NM_032638, NM_000610, NM_014945, NM_001130834, NM_053001, NM_003745, NM_006871, NM_000799, NM_000797, NM_001012614, NM_023110, NM_148919, NM_172349, NM_001127511, NM_002796, NM_002698, NM_0…	564	2698	15185	1.437	0.0144018	0.00111526	4.8e-05
GO:0030154~cell differentiation	174	25.816	2.79e-06	NM_001077182, NM_182932, NM_001014434, NR_024043, NM_001001557, NM_000609, NM_003540, NM_004350, NM_001136022, NM_001136021, NM_000885, NM_003636, NM_006203, NM_001160259, NM_009587, NM_001160258, NM_001002919, NM_017521, NM_032638, NM_032531, NM_000275, NM_016135, NM_053001, NM_003745, NM_005348, NM_006871, NM_000799, NM_001012614, NM_012445, NM_001104631, NM_152989, NM_001033886, NM_012443, NM_…	564	3420	15185	1.36981	0.0161791	0.00116443	5.4e-05
GO:0030154~cell differentiation	174	25.816	2.79e-06	NM_001077182, NM_182932, NM_001014434, NR_024043, NM_001001557, NM_000609, NM_003540, NM_004350, NM_001136022, NM_001136021, NM_000885, NM_003636, NM_006203, NM_001160259, NM_009587, NM_001160258, NM_001002919, NM_017521, NM_032638, NM_032531, NM_000275, NM_016135, NM_053001, NM_003745, NM_005348, NM_006871, NM_000799, NM_001012614, NM_012445, NM_001104631, NM_152989, NM_001033886, NM_012443, NM_…	564	3420	15185	1.36981	0.0161791	0.00116443	5.4e-05
GO:0006357~regulation of transcription from RNA polymerase II promoter	100	14.8368	2.87e-06	NM_002015, NM_213594, NM_001001557, NM_002017, NM_138457, NM_004350, NM_002309, NM_033131, NR_003084, NM_006194, NM_016463, NM_001136022, NM_001164, NM_001136021, NM_021105, NM_003152, NM_003151, NM_173485, NM_014212, NM_002501, NM_145902, NM_145901, NM_017521, NM_145903, NM_032638, NM_024015, NM_001135649, NM_014945, NM_016135, NM_001130834, NM_053001, NM_001166176, NM_001077261, NM_001166175, N…	564	1701	15185	1.58282	0.0166494	0.00111867	5.56e-05
GO:0048518~positive regulation of biological process	233	34.5697	3.55e-06	NM_182932, NM_213594, NM_004350, NM_016463, NM_006346, NM_001136022, NM_001136021, NM_006203, NM_001004019, NM_017521, NM_032638, NM_001145645, NM_005348, NM_024736, NM_001165035, NM_001033886, NM_148919, NM_001127511, NM_001127216, NM_139211, NM_139212, NM_001127510, NM_006497, NM_006209, NM_001702, NM_058240, NM_001706, NM_006312, NM_005475, NM_005583, NM_006237, NM_001115, NM_001164346, NM_006…	564	4901	15185	1.27999	0.0205386	0.00129619	6.87e-05
GO:0048518~positive regulation of biological process	233	34.5697	3.55e-06	NM_182932, NM_213594, NM_004350, NM_016463, NM_006346, NM_001136022, NM_001136021, NM_006203, NM_001004019, NM_017521, NM_032638, NM_001145645, NM_005348, NM_024736, NM_001165035, NM_001033886, NM_148919, NM_001127511, NM_001127216, NM_139211, NM_139212, NM_001127510, NM_006497, NM_006209, NM_001702, NM_058240, NM_001706, NM_006312, NM_005475, NM_005583, NM_006237, NM_001115, NM_001164346, NM_006…	564	4901	15185	1.27999	0.0205386	0.00129619	6.87e-05
GO:0010628~positive regulation of gene expression	95	14.095	3.6e-06	NM_002015, NR_024043, NM_001001557, NM_213594, NM_002017, NM_002309, NM_003540, NM_004350, NM_033131, NM_003246, NM_002308, NM_003534, NM_003533, NM_006194, NM_147156, NM_003531, NM_001164, NM_001136022, NM_021105, NM_001136021, NM_003151, NM_014212, NM_009587, NM_002501, NM_145902, NM_145901, NM_145903, NM_017521, NM_032638, NM_024015, NM_004155, NM_014945, NM_001130834, NM_014634, NM_053001, NM…	564	1599	15185	1.5996	0.020801	0.00123573	6.96e-05
GO:0022008~neurogenesis	85	12.6113	3.62e-06	NM_001134407, NM_002305, NM_001077182, NM_001134408, NM_001014434, NM_182932, NM_000905, NM_001001557, NM_020443, NM_000609, NM_002309, NM_004350, NM_033131, NM_000582, NM_001130138, NM_001130137, NM_016083, NM_001167738, NM_001164, NM_001136022, NM_001160259, NM_005010, NM_001160258, NM_001130136, NM_017521, NM_001002919, NM_032638, NM_033262, NM_032531, NM_001166176, NM_001130064, NM_005348, NM…	564	1382	15185	1.65595	0.0209492	0.00117552	7.01e-05
GO:0048869~cellular developmental process	186	27.5964	4.31e-06	NM_001077182, NM_182932, NM_001014434, NR_024043, NM_213594, NM_001001557, NM_000609, NM_003540, NM_004350, NM_147150, NM_001136022, NM_006346, NM_001136021, NM_000885, NM_003636, NM_006203, NM_001160259, NM_009587, NM_001160258, NM_001002919, NM_017521, NM_032638, NM_198517, NM_032531, NM_000275, NM_014945, NM_016135, NM_003745, NM_053001, NM_005348, NM_006871, NM_000799, NM_001012614, NM_024490…	564	3737	15185	1.34006	0.0248545	0.00132378	8.33e-05
GO:0002682~regulation of immune system process	77	11.4243	4.32e-06	NM_002305, NR_024043, NM_002209, NM_017806, NM_001004196, NM_006113, NM_002116, NM_000609, NM_002309, NR_026750, NM_003540, NM_033131, NM_003246, NM_002308, NM_016083, NM_006346, NM_001136021, NM_021105, NM_000885, NM_006203, NM_004159, NM_009587, NM_001160259, NM_001160258, NM_032638, NM_001145645, NM_005720, NM_004155, NM_198517, NM_001114380, NM_003745, NM_001725, NM_005348, NM_006871, NM_0007…	564	1217	15185	1.70348	0.0249457	0.00126231	8.37e-05
GO:0002682~regulation of immune system process	77	11.4243	4.32e-06	NM_002305, NR_024043, NM_002209, NM_017806, NM_001004196, NM_006113, NM_002116, NM_000609, NM_002309, NR_026750, NM_003540, NM_033131, NM_003246, NM_002308, NM_016083, NM_006346, NM_001136021, NM_021105, NM_000885, NM_006203, NM_004159, NM_009587, NM_001160259, NM_001160258, NM_032638, NM_001145645, NM_005720, NM_004155, NM_198517, NM_001114380, NM_003745, NM_001725, NM_005348, NM_006871, NM_0007…	564	1217	15185	1.70348	0.0249457	0.00126231	8.37e-05
GO:1903507~negative regulation of nucleic acid-templated transcription	70	10.3858	4.5e-06	NM_002015, NM_001014434, NM_004350, NM_003540, NM_003534, NM_006194, NM_003533, NM_003531, NM_016463, NM_001136022, NM_001136021, NM_173485, NM_002501, NM_145902, NM_145901, NM_017521, NM_145903, NM_032638, NM_024015, NM_016135, NM_014634, NM_053001, NM_001166176, NM_001077261, NM_001166175, NM_130439, NM_000799, NM_001012614, NM_002010, NM_001008541, NM_023110, NM_172349, NM_005170, NM_022455, N…	564	1072	15185	1.75808	0.0259166	0.00124962	8.69e-05
GO:0007154~cell communication	263	39.0208	5.37e-06	NM_182932, NM_213594, NM_080865, NM_002387, NM_016463, NM_001136022, NM_006346, NM_001136021, NM_006203, NM_032638, NM_001145645, NM_198517, NM_130843, NM_130842, NM_005348, NM_207322, NM_024736, NM_001033886, NM_005072, NM_148919, NM_001127511, NM_013416, NM_032641, NM_001127216, NM_001134366, NM_001127510, NM_006225, NM_080797, NM_006497, NM_006209, NM_001702, NM_001145961, NM_058240, NM_001706…	564	5699	15185	1.24249	0.0308597	0.0014238	0.000103794
GO:0044699~single-organism process	493	73.1454	5.5e-06	NM_182932, NM_001014434, NM_080865, NM_002387, NM_001136022, NM_006346, NM_001136021, NM_017521, NM_032531, NM_000275, NM_130843, NM_130842, NM_001725, NM_130439, NM_207322, NM_024736, NM_001033886, NM_001134772, NM_005072, NM_001134773, NM_148919, NM_000247, NM_021599, NM_001134366, NM_001127216, NM_001134367, NM_139211, NM_139212, NM_182964, NM_001702, NM_005069, NM_058240, NM_001706, NM_006312…	564	12212	15185	1.08692	0.0316408	0.00139695	0.000106464
GO:0098609~cell-cell adhesion	71	10.5341	5.97e-06	NM_002305, NR_024043, NM_002209, NM_001161586, NM_001004196, NM_002116, NM_000609, NM_033131, NM_003736, NM_002308, NM_003534, NM_003533, NM_003531, NM_000885, NM_009587, NM_005010, NM_000610, NM_001145645, NM_199328, NM_032531, NM_001114380, NM_144779, NM_018915, NM_018916, NM_014164, NM_006871, NM_000799, NM_018912, NM_030968, NM_018917, NM_006680, NM_018918, NM_198594, NM_018919, NM_001033886,…	564	1102	15185	1.73465	0.0342423	0.00145071	0.000115371
GO:0048699~generation of neurons	80	11.8694	6.07e-06	NM_002305, NM_001077182, NM_001014434, NM_000905, NM_001001557, NM_020443, NM_000609, NM_002309, NM_004350, NM_033131, NM_000582, NM_001130138, NM_001130137, NM_016083, NM_001167738, NM_001164, NM_001136022, NM_001160259, NM_005010, NM_001160258, NM_001130136, NM_017521, NM_001002919, NM_032638, NM_032531, NM_001166176, NM_001130064, NM_005348, NM_001166175, NM_016073, NM_015085, NM_000799, NM_00…	564	1293	15185	1.66582	0.0348454	0.00141767	0.000117439
GO:1902679~negative regulation of RNA biosynthetic process	70	10.3858	7.3e-06	NM_002015, NM_001014434, NM_004350, NM_003540, NM_003534, NM_006194, NM_003533, NM_003531, NM_016463, NM_001136022, NM_001136021, NM_173485, NM_002501, NM_145902, NM_145901, NM_017521, NM_145903, NM_032638, NM_024015, NM_016135, NM_014634, NM_053001, NM_001166176, NM_001077261, NM_001166175, NM_130439, NM_000799, NM_001012614, NM_002010, NM_001008541, NM_023110, NM_172349, NM_005170, NM_022455, N…	564	1087	15185	1.73382	0.0417565	0.00163917	0.000141233
GO:0050793~regulation of developmental process	112	16.6172	9.53e-06	NM_002305, NR_024043, NM_213594, NM_001001557, NM_000906, NM_000609, NM_003540, NM_003247, NM_002309, NM_033131, NM_022489, NM_000582, NM_002308, NM_003246, NM_001130138, NM_001130137, NM_006194, NM_016083, NM_147150, NM_001136022, NM_001164, NM_001136021, NM_003152, NM_004864, NM_014212, NM_001160259, NM_009587, NM_005010, NM_004159, NM_001160258, NM_145902, NM_145901, NM_001130136, NM_145903, N…	564	2020	15185	1.4928	0.0541525	0.00205987	0.000184343
GO:0050793~regulation of developmental process	112	16.6172	9.53e-06	NM_002305, NR_024043, NM_213594, NM_001001557, NM_000906, NM_000609, NM_003540, NM_003247, NM_002309, NM_033131, NM_022489, NM_000582, NM_002308, NM_003246, NM_001130138, NM_001130137, NM_006194, NM_016083, NM_147150, NM_001136022, NM_001164, NM_001136021, NM_003152, NM_004864, NM_014212, NM_001160259, NM_009587, NM_005010, NM_004159, NM_001160258, NM_145902, NM_145901, NM_001130136, NM_145903, N…	564	2020	15185	1.4928	0.0541525	0.00205987	0.000184343
GO:0050793~regulation of developmental process	112	16.6172	9.53e-06	NM_002305, NR_024043, NM_213594, NM_001001557, NM_000906, NM_000609, NM_003540, NM_003247, NM_002309, NM_033131, NM_022489, NM_000582, NM_002308, NM_003246, NM_001130138, NM_001130137, NM_006194, NM_016083, NM_147150, NM_001136022, NM_001164, NM_001136021, NM_003152, NM_004864, NM_014212, NM_001160259, NM_009587, NM_005010, NM_004159, NM_001160258, NM_145902, NM_145901, NM_001130136, NM_145903, N…	564	2020	15185	1.4928	0.0541525	0.00205987	0.000184343
GO:0048666~neuron development	61	9.05045	1.01e-05	NM_002305, NM_001077182, NM_001014434, NM_000905, NM_000609, NM_004350, NM_002309, NM_033131, NM_000582, NM_001130138, NM_016083, NM_001130137, NM_001136022, NM_001164, NM_005010, NM_001160259, NM_001160258, NM_001130136, NM_017521, NM_001002919, NM_032638, NM_032531, NM_001130064, NM_016073, NM_015085, NM_000799, NM_002220, NM_012445, NM_001033886, NM_005277, NM_006688, NM_023110, NM_003126, NM_…	564	912	15185	1.80082	0.0575327	0.00211398	0.000196196
GO:0045892~negative regulation of transcription, DNA-templated	67	9.94065	1.08e-05	NM_002015, NM_001014434, NM_004350, NM_003540, NM_003534, NM_006194, NM_003533, NM_003531, NM_016463, NM_001136022, NM_001136021, NM_173485, NM_002501, NM_145902, NM_145901, NM_145903, NM_024015, NM_032638, NM_016135, NM_014634, NM_053001, NM_001166176, NM_001077261, NM_001166175, NM_000799, NM_001012614, NM_002010, NM_023110, NM_172349, NM_005170, NM_022455, NM_004991, NM_001127216, NM_139211, N…	564	1037	15185	1.73953	0.0609407	0.00216581	0.000208189
GO:0051239~regulation of multicellular organismal process	133	19.7329	1.33e-05	NM_182932, NM_018398, NR_024043, NM_213594, NM_001001557, NM_172364, NM_000609, NM_003540, NM_003247, NM_003246, NM_006194, NM_002387, NM_001136022, NM_006346, NM_003152, NM_006203, NM_001160259, NM_009587, NM_001160258, NM_001002919, NM_032638, NM_003235, NM_001725, NM_003745, NM_053001, NM_005348, NM_006871, NM_000799, NM_024736, NM_012445, NM_001104631, NM_152989, NM_001033886, NM_001001579, N…	564	2522	15185	1.41985	0.07451	0.00257774	0.000256377
GO:0032501~multicellular organismal process	288	42.73	1.38e-05	NM_182932, NM_001014434, NM_213594, NM_004350, NM_002387, NM_001136022, NM_006346, NM_001136021, NM_006203, NM_017521, NM_032638, NM_032531, NM_016135, NM_000275, NM_005086, NM_001725, NM_005348, NM_024736, NM_018917, NM_001033886, NM_148919, NM_001127511, NM_021599, NM_001127216, NM_139211, NM_012418, NM_139212, NM_001127510, NM_006225, NM_134269, NM_182964, NM_006497, NM_006209, NM_001702, NM_0…	564	6419	15185	1.20798	0.0773419	0.00259329	0.000266522
GO:0030030~cell projection organization	75	11.1276	2.16e-05	NM_002305, NM_001014434, NM_000905, NM_213594, NM_006113, NM_000609, NM_033131, NM_000582, NM_001130138, NM_001130137, NM_016083, NM_001164, NM_001136022, NM_006346, NM_001160259, NM_005010, NM_001160258, NM_001130136, NM_001002919, NM_198517, NM_032531, NM_014945, NM_001040092, NM_005348, NM_001130064, NM_144779, NM_016073, NM_014164, NM_015085, NM_000799, NM_002220, NM_012445, NM_001033886, NM_…	564	1231	15185	1.64036	0.118753	0.00394274	0.000418532
GO:2000026~regulation of multicellular organismal development	93	13.7982	2.17e-05	NM_002305, NR_024043, NM_001001557, NM_213594, NM_000906, NM_000609, NM_002309, NM_003540, NM_003247, NM_033131, NM_002308, NM_003246, NM_000582, NM_001130138, NM_001130137, NM_016083, NM_006194, NM_001164, NM_001136022, NM_014212, NM_009587, NM_004159, NM_001160259, NM_005010, NM_001160258, NM_001130136, NM_001002919, NM_032638, NM_001144759, NM_001144758, NM_001040092, NM_003235, NM_053001, NM_…	564	1627	15185	1.53897	0.119294	0.00384202	0.000420564
GO:2000026~regulation of multicellular organismal development	93	13.7982	2.17e-05	NM_002305, NR_024043, NM_001001557, NM_213594, NM_000906, NM_000609, NM_002309, NM_003540, NM_003247, NM_033131, NM_002308, NM_003246, NM_000582, NM_001130138, NM_001130137, NM_016083, NM_006194, NM_001164, NM_001136022, NM_014212, NM_009587, NM_004159, NM_001160259, NM_005010, NM_001160258, NM_001130136, NM_001002919, NM_032638, NM_001144759, NM_001144758, NM_001040092, NM_003235, NM_053001, NM_…	564	1627	15185	1.53897	0.119294	0.00384202	0.000420564
GO:0000122~negative regulation of transcription from RNA polymerase II promoter	48	7.12166	2.43e-05	NM_002015, NM_152731, NM_000545, NM_032495, NM_003394, NM_004350, NM_006237, NM_001098202, NM_016463, NM_001136021, NM_173485, NM_002501, NM_001164346, NM_032638, NM_024015, NM_001164345, NM_001164344, NM_001164343, NM_001142462, NM_016135, NM_053001, NM_001164347, NM_001166176, NM_018699, NM_001077261, NM_001166175, NM_023111, NM_006060, NM_000799, NM_023067, NM_001012614, NM_002010, NM_000209, …	564	675	15185	1.91458	0.0602672	0.0602672	0.000430152
GO:0009653~anatomical structure morphogenesis	131	19.4362	2.49e-05	NM_001077182, NM_001014434, NM_213594, NM_000609, NM_003247, NM_003246, NM_006194, NM_147150, NM_006346, NM_001136022, NM_001136021, NM_000885, NM_032638, NM_001145645, NM_198517, NM_032531, NM_014945, NM_016135, NM_053001, NM_024490, NM_012445, NM_001033886, NM_023110, NM_148919, NM_003126, NM_002796, NM_152795, NM_012418, NM_139211, NM_139212, NM_003277, NM_023108, NM_001161707, NM_001167681, N…	564	2507	15185	1.40687	0.13522	0.00426384	0.000480969
GO:0051253~negative regulation of RNA metabolic process	70	10.3858	2.49e-05	NM_002015, NM_001014434, NM_004350, NM_003540, NM_003534, NM_006194, NM_003533, NM_003531, NM_016463, NM_001136022, NM_001136021, NM_173485, NM_002501, NM_145902, NM_145901, NM_017521, NM_145903, NM_032638, NM_024015, NM_016135, NM_014634, NM_053001, NM_001166176, NM_001077261, NM_001166175, NM_130439, NM_000799, NM_001012614, NM_002010, NM_001008541, NM_023110, NM_172349, NM_005170, NM_022455, N…	564	1129	15185	1.66932	0.135556	0.00415331	0.000482253
GO:0098742~cell-cell adhesion via plasma-membrane adhesion molecules	23	3.41246	2.56e-05	NM_002209, NM_032088, NM_001161586, NM_001004196, NM_001305, NM_018920, NM_001130861, NM_018923, NM_018922, NM_018925, NM_003736, NM_018924, NM_003277, NM_001161707, NM_001164605, NM_001943, NM_199328, NM_032531, NR_028406, NM_032099, NM_001114380, NM_144779, NM_018915, NM_014164, NM_005944, NM_018916, NM_001014811, NM_018912, NM_006680, NM_018917, NM_018918, NM_022124, NM_018919	564	221	15185	2.80202	0.138714	0.00413943	0.000494368
GO:0031344~regulation of cell projection organization	41	6.08309	2.86e-05	NM_002305, NM_001130863, NM_006640, NM_000609, NM_033131, NM_018206, NM_000582, NM_001130138, NM_016083, NM_001130137, NM_001136022, NM_001164, NM_003966, NM_005010, NM_001160259, NM_001160258, NM_004443, NM_001130136, NM_001002919, NM_153498, NM_198517, NM_020397, NM_003380, NM_001040092, NM_015568, NM_022772, NM_005348, NM_001130064, NM_000038, NM_023111, NM_015085, NM_000799, NR_027767, NM_002…	564	543	15185	2.03292	0.154018	0.00451028	0.000553707
GO:0050865~regulation of cell activation	36	5.34125	3.01e-05	NM_002305, NR_024043, NM_001004196, NM_006113, NM_001775, NM_002116, NM_033131, NM_003246, NM_002308, NM_016083, NM_032415, NM_003821, NM_006346, NM_021105, NM_001136021, NM_009587, NM_001160259, NM_001160258, NM_032638, NM_006573, NM_001145645, NM_198517, NM_145182, NM_001725, NM_013258, NM_006871, NM_000799, NM_030968, NM_198594, NM_001130845, NM_003126, NM_014387, NM_000247, NM_000660, NM_0011…	564	450	15185	2.1539	0.161072	0.00461118	0.000581416
GO:0002376~immune system process	118	17.5074	3.02e-05	NM_182932, NR_024043, NM_017806, NM_000609, NM_003540, NM_004350, NM_003246, NM_006346, NM_001136021, NM_003636, NM_000885, NM_006203, NM_009587, NM_001160259, NM_001160258, NM_032638, NM_000610, NM_001145645, NM_198517, NM_032531, NM_003745, NM_001725, NM_005348, NM_006871, NM_000799, NM_024736, NM_012445, NM_001104631, NM_001033886, NM_148919, NM_003126, NM_002796, NM_000247, NM_002698, NM_0134…	564	2212	15185	1.43626	0.161744	0.00451368	0.00058407
GO:0002376~immune system process	118	17.5074	3.02e-05	NM_182932, NR_024043, NM_017806, NM_000609, NM_003540, NM_004350, NM_003246, NM_006346, NM_001136021, NM_003636, NM_000885, NM_006203, NM_009587, NM_001160259, NM_001160258, NM_032638, NM_000610, NM_001145645, NM_198517, NM_032531, NM_003745, NM_001725, NM_005348, NM_006871, NM_000799, NM_024736, NM_012445, NM_001104631, NM_001033886, NM_148919, NM_003126, NM_002796, NM_000247, NM_002698, NM_0134…	564	2212	15185	1.43626	0.161744	0.00451368	0.00058407
GO:0000122~negative regulation of transcription from RNA polymerase II promoter	49	7.27003	3.21e-05	NM_002015, NM_152731, NM_000545, NM_003394, NM_032495, NM_004350, NM_006237, NM_001098202, NM_016463, NM_001136022, NM_001136021, NM_173485, NM_002501, NM_032638, NM_024015, NM_001164346, NM_001164345, NM_001164344, NM_001164343, NM_001142462, NM_016135, NM_053001, NM_001166176, NM_001164347, NM_001077261, NM_018699, NM_001166175, NM_023111, NM_006060, NM_000799, NM_023067, NM_001012614, NM_00201…	564	702	15185	1.87929	0.171038	0.00467854	0.000620965
GO:0002694~regulation of leukocyte activation	34	5.04451	3.55e-05	NM_002305, NR_024043, NM_001004196, NM_006113, NM_001775, NM_002116, NM_033131, NM_003246, NM_002308, NM_016083, NM_032415, NM_003821, NM_006346, NM_021105, NM_001136021, NM_009587, NM_001160259, NM_001160258, NM_032638, NM_006573, NM_001145645, NM_198517, NM_145182, NM_001725, NM_013258, NM_006871, NM_000799, NM_003126, NM_001130845, NM_014387, NM_000247, NM_000660, NM_001164489, NM_001013838, N…	564	417	15185	2.19522	0.187505	0.00505172	0.000687365
GO:0002694~regulation of leukocyte activation	34	5.04451	3.55e-05	NM_002305, NR_024043, NM_001004196, NM_006113, NM_001775, NM_002116, NM_033131, NM_003246, NM_002308, NM_016083, NM_032415, NM_003821, NM_006346, NM_021105, NM_001136021, NM_009587, NM_001160259, NM_001160258, NM_032638, NM_006573, NM_001145645, NM_198517, NM_145182, NM_001725, NM_013258, NM_006871, NM_000799, NM_003126, NM_001130845, NM_014387, NM_000247, NM_000660, NM_001164489, NM_001013838, N…	564	417	15185	2.19522	0.187505	0.00505172	0.000687365
GO:0030182~neuron differentiation	71	10.5341	3.69e-05	NM_002305, NM_001077182, NM_001014434, NM_000905, NM_001001557, NM_000609, NM_002309, NM_004350, NM_033131, NM_000582, NM_001130138, NM_016083, NM_001130137, NM_001136022, NM_001164, NM_001160259, NM_005010, NM_001160258, NM_001130136, NM_017521, NM_001002919, NM_032638, NM_032531, NM_001166176, NM_001130064, NM_001166175, NM_016073, NM_015085, NM_000799, NM_002220, NM_012445, NM_001033886, NM_00…	564	1164	15185	1.64226	0.193731	0.00511397	0.00071282
GO:0051094~positive regulation of developmental process	65	9.64392	3.7e-05	NM_002305, NR_024043, NM_001001557, NM_000609, NM_002309, NM_003247, NM_033131, NM_003246, NM_002308, NM_001130138, NM_016083, NM_001130137, NM_001164, NM_001136021, NM_004864, NM_014212, NM_009587, NM_001160259, NM_005010, NM_145902, NM_001160258, NM_145901, NM_001130136, NM_145903, NM_001002919, NM_032638, NM_001144759, NM_001145645, NM_001144758, NM_001040092, NM_053001, NM_001166176, NM_00116…	564	1036	15185	1.68923	0.194207	0.005009	0.000714774
GO:0045595~regulation of cell differentiation	84	12.4629	4.15e-05	NM_002305, NM_002015, NR_024043, NM_001001557, NM_000609, NM_002309, NM_003540, NM_004350, NM_033131, NM_002308, NM_000582, NM_001130138, NM_001130137, NM_016083, NM_001164, NM_001136022, NM_001136021, NM_004864, NM_009587, NM_001160259, NM_005010, NM_001160258, NM_001130136, NM_001002919, NM_032638, NM_024015, NM_001144759, NM_001144758, NM_001166176, NM_001166175, NM_015085, NM_000799, NM_00222…	564	1453	15185	1.5565	0.215312	0.0054955	0.000802594
GO:0045595~regulation of cell differentiation	84	12.4629	4.15e-05	NM_002305, NM_002015, NR_024043, NM_001001557, NM_000609, NM_002309, NM_003540, NM_004350, NM_033131, NM_002308, NM_000582, NM_001130138, NM_001130137, NM_016083, NM_001164, NM_001136022, NM_001136021, NM_004864, NM_009587, NM_001160259, NM_005010, NM_001160258, NM_001130136, NM_001002919, NM_032638, NM_024015, NM_001144759, NM_001144758, NM_001166176, NM_001166175, NM_015085, NM_000799, NM_00222…	564	1453	15185	1.5565	0.215312	0.0054955	0.000802594
GO:0031325~positive regulation of cellular metabolic process	137	20.3264	4.7e-05	NR_024043, NM_001001557, NM_213594, NM_004350, NM_003246, NM_006194, NM_006346, NM_001136022, NM_001136021, NM_003151, NM_009587, NM_001002919, NM_032638, NM_000610, NM_014945, NM_001130834, NM_053001, NM_003745, NM_005348, NM_006871, NM_000799, NM_000797, NM_001012614, NM_023110, NM_148919, NM_172349, NM_002796, NM_002698, NM_001031847, NM_022455, NM_152795, NM_030915, NM_023108, NM_001167681, N…	564	2682	15185	1.3753	0.239872	0.00607631	0.000907805
GO:0007156~homophilic cell adhesion via plasma membrane adhesion molecules	18	2.67062	5.33e-05	NM_032088, NM_032531, NM_001161586, NM_032099, NM_001004196, NM_018920, NM_018923, NM_018922, NM_018925, NM_003736, NM_018924, NM_018915, NM_018916, NM_005944, NM_001161707, NM_001014811, NM_001943, NM_018912, NM_018917, NM_006680, NM_022124, NM_018918, NM_018919	564	153	15185	3.1675	0.127398	0.0658681	0.000942799
GO:0044763~single-organism cellular process	456	67.6558	5.38e-05	NM_182932, NM_001014434, NM_080865, NM_002387, NM_006346, NM_001136022, NM_001136021, NM_017521, NM_032531, NM_000275, NM_130843, NM_130842, NM_001725, NM_130439, NM_207322, NM_024736, NM_001033886, NM_001134772, NM_005072, NM_001134773, NM_148919, NM_000247, NM_021599, NM_001134366, NM_001127216, NM_001134367, NM_139211, NM_139212, NM_001702, NM_058240, NM_005069, NM_001706, NM_001080397, NM_006…	564	11221	15185	1.09413	0.269656	0.00680802	0.00104004
GO:0007156~homophilic cell adhesion via plasma membrane adhesion molecules	18	2.67062	5.79e-05	NM_032088, NM_032531, NM_001161586, NM_032099, NM_001004196, NM_018920, NM_018923, NM_018922, NM_018925, NM_003736, NM_018924, NM_018915, NM_018916, NM_005944, NM_001161707, NM_001014811, NM_001943, NM_018912, NM_018917, NM_006680, NM_022124, NM_018918, NM_018919	564	154	15185	3.14693	0.287106	0.00717461	0.00112003
GO:0006366~transcription from RNA polymerase II promoter	37	5.48961	7.29e-05	NM_213594, NM_002017, NM_000545, NM_004350, NM_006237, NM_006194, NM_001136022, NM_021105, NM_001136021, NM_014212, NM_002501, NM_145902, NM_006734, NM_145901, NM_145903, NM_017521, NM_032638, NM_001142462, NM_016135, NM_005593, NM_002147, NM_053001, NM_001166176, NM_001166175, NM_023067, NM_032491, NM_031944, NM_006162, NM_152989, NM_021926, NM_000209, NM_001031680, NM_001422, NM_172388, NM_1723…	564	489	15185	2.03718	0.169993	0.0602176	0.00128881
GO:0002520~immune system development	51	7.56677	7.89e-05	NM_002305, NM_182932, NR_024043, NM_002017, NM_004350, NM_003540, NM_002309, NM_033131, NM_002308, NM_000885, NM_003636, NM_009587, NM_024015, NM_032638, NM_033262, NM_032531, NM_001166176, NM_000719, NM_001166175, NM_006871, NM_000799, NM_003126, NM_002698, NM_004991, NM_172130, NM_001127216, NM_002729, NM_002899, NM_001161707, NM_001167681, NM_005263, NM_058240, NM_001706, NM_006896, NM_005475,…	564	769	15185	1.78558	0.369268	0.00955558	0.00152498
GO:0050896~response to stimulus	326	48.368	8.01e-05	NM_182932, NM_001014434, NM_213594, NM_004350, NM_080865, NM_002387, NM_016463, NM_001136022, NM_006346, NM_001136021, NM_006203, NM_032638, NM_001145645, NM_198517, NM_130843, NM_130842, NM_001725, NM_005348, NM_024736, NM_001033886, NM_148919, NM_001127511, NM_000247, NM_013416, NM_032641, NM_024843, NM_001134366, NM_001127216, NM_139211, NM_139212, NM_001127510, NM_006225, NM_080797, NM_006497…	564	7569	15185	1.15962	0.373573	0.00949995	0.00154763
GO:0045321~leukocyte activation	46	6.82493	8.54e-05	NM_002305, NM_004310, NR_024043, NM_002209, NM_005583, NM_001004196, NM_006113, NM_001775, NM_002116, NR_027353, NM_033131, NM_002308, NM_003246, NM_016083, NM_032415, NM_003821, NM_006346, NM_021105, NM_001136021, NM_000885, NM_001160259, NM_009587, NM_001160258, NM_006573, NM_032638, NM_001145645, NM_198517, NM_145182, NM_001768, NM_001114380, NM_001725, NM_013258, NM_006060, NM_006871, NM_0007…	564	670	15185	1.8485	0.392787	0.00992789	0.00165062
GO:0045321~leukocyte activation	46	6.82493	8.54e-05	NM_002305, NM_004310, NR_024043, NM_002209, NM_005583, NM_001004196, NM_006113, NM_001775, NM_002116, NR_027353, NM_033131, NM_002308, NM_003246, NM_016083, NM_032415, NM_003821, NM_006346, NM_021105, NM_001136021, NM_000885, NM_001160259, NM_009587, NM_001160258, NM_006573, NM_032638, NM_001145645, NM_198517, NM_145182, NM_001768, NM_001114380, NM_001725, NM_013258, NM_006060, NM_006871, NM_0007…	564	670	15185	1.8485	0.392787	0.00992789	0.00165062
GO:0007165~signal transduction	237	35.1632	9.52e-05	NM_213594, NM_080865, NM_002387, NM_016463, NM_006346, NM_001136022, NM_001136021, NM_006203, NM_032638, NM_001145645, NM_198517, NM_005348, NM_001033886, NM_148919, NM_001127511, NM_013416, NM_032641, NM_001127216, NM_001127510, NM_006225, NM_080797, NM_006497, NM_006209, NM_001702, NM_001706, NM_005990, NM_005475, NM_001093771, NM_001500, NM_007202, NM_004310, NM_007203, NM_153483, NM_183337, N…	564	5224	15185	1.22146	0.426716	0.01085	0.00184069
GO:0006366~transcription from RNA polymerase II promoter	93	13.7982	0.000108892	NM_002015, NM_001001557, NM_213594, NM_002017, NM_002309, NM_004350, NM_033131, NM_006194, NM_016463, NM_001164, NM_001136022, NM_021105, NM_001136021, NM_003151, NM_014212, NM_173485, NM_002501, NM_145902, NM_145901, NM_006734, NM_145903, NM_017521, NM_032638, NM_024015, NM_016135, NM_014945, NM_001130834, NM_053001, NM_001166176, NM_001077261, NM_001166175, NM_000799, NM_001012614, NM_021926, N…	564	1698	15185	1.47462	0.470632	0.0121577	0.00210409
GO:0048522~positive regulation of cellular process	206	30.5638	0.000109272	NM_182932, NR_024043, NM_001001557, NM_213594, NM_001045557, NM_001045556, NM_000609, NM_004350, NM_003247, NM_003246, NM_006194, NM_001142445, NM_016463, NM_001136022, NM_006346, NM_001136021, NM_003152, NM_003151, NM_000885, NM_009587, NM_001160259, NM_001160258, NM_001142446, NM_001002919, NM_032638, NM_000610, NM_001145645, NM_014945, NM_001130834, NM_003745, NM_053001, NM_005348, NM_006871, …	564	4440	15185	1.24917	0.471808	0.0119711	0.00211143
GO:0051240~positive regulation of multicellular organismal process	78	11.5727	0.000114138	NM_002305, NR_024043, NM_001001557, NM_000906, NM_002116, NM_000609, NM_002309, NM_003247, NM_033131, NM_003246, NM_002308, NM_000582, NM_001130138, NM_001130137, NM_016083, NM_001164, NM_001136022, NM_006346, NM_003152, NM_006203, NM_014212, NM_001160259, NM_009587, NM_005010, NM_001160258, NM_001130136, NM_001002919, NM_032638, NM_001144759, NM_001144758, NM_001040092, NM_014634, NM_053001, NM_…	564	1362	15185	1.54189	0.48661	0.0122708	0.00220536
GO:0048568~embryonic organ development	32	4.74777	0.000119567	NM_001110219, NM_001136271, NM_023110, NM_005170, NM_172037, NM_000660, NM_033150, NM_006783, NM_002309, NM_014620, NM_033131, NM_004387, NM_002729, NM_023108, NM_023105, NM_001844, NM_023107, NM_014212, NM_023106, NM_006225, NM_032638, NM_024015, NM_001142462, NM_005519, NM_005593, NM_002147, NM_001145661, NM_001145662, NM_005221, NM_053001, NM_001110221, NM_006492, NM_001110220, NM_001166176, N…	564	406	15185	2.12207	0.502637	0.0126185	0.00231014
GO:1903508~positive regulation of nucleic acid-templated transcription	74	10.9792	0.000127635	NM_002015, NM_213594, NM_001001557, NM_002017, NM_002309, NM_004350, NM_033131, NM_006194, NM_001136022, NM_001164, NM_021105, NM_001136021, NM_003151, NM_014212, NM_002501, NM_145902, NM_145901, NM_145903, NM_032638, NM_024015, NM_014945, NM_001130834, NM_053001, NM_001166176, NM_001166175, NM_000799, NM_021926, NM_172349, NM_002698, NM_022455, NM_152795, NM_022462, NM_004991, NM_001989, NM_0309…	564	1278	15185	1.55897	0.525534	0.0132254	0.00246583
GO:0045893~positive regulation of transcription, DNA-templated	74	10.9792	0.000127635	NM_002015, NM_213594, NM_001001557, NM_002017, NM_002309, NM_004350, NM_033131, NM_006194, NM_001136022, NM_001164, NM_021105, NM_001136021, NM_003151, NM_014212, NM_002501, NM_145902, NM_145901, NM_145903, NM_032638, NM_024015, NM_014945, NM_001130834, NM_053001, NM_001166176, NM_001166175, NM_000799, NM_021926, NM_172349, NM_002698, NM_022455, NM_152795, NM_022462, NM_004991, NM_001989, NM_0309…	564	1278	15185	1.55897	0.525534	0.0132254	0.00246583
GO:0048646~anatomical structure formation involved in morphogenesis	66	9.79228	0.000146783	NM_002015, NM_213594, NM_000906, NM_006113, NM_003247, NM_033131, NM_003246, NM_001136022, NM_006346, NM_001136021, NM_004864, NM_000885, NM_014212, NM_005010, NM_032638, NM_001144759, NM_001145645, NM_001144758, NM_014945, NM_001166176, NM_001166175, NM_002010, NM_023110, NM_152795, NM_033150, NM_022462, NM_139211, NM_002729, NM_001037132, NM_139212, NM_023108, NM_023105, NM_023107, NM_023106, N…	564	1108	15185	1.60376	0.575746	0.0149299	0.00283526
GO:0031175~neuron projection development	50	7.4184	0.000151706	NM_002305, NM_001014434, NM_000905, NM_000609, NM_033131, NM_006237, NM_000582, NM_001130138, NM_001130137, NM_016083, NM_001164, NM_001136022, NM_003966, NM_001160259, NM_005010, NM_001160258, NM_004443, NM_001130136, NM_001002919, NM_153498, NM_032531, NM_020397, NM_003380, NM_001130064, NM_023111, NM_016073, NM_015085, NM_000799, NM_003957, NR_027767, NM_002220, NM_012445, NM_001033886, NM_005…	564	769	15185	1.75057	0.587774	0.0151629	0.00293023
GO:0010557~positive regulation of macromolecule biosynthetic process	84	12.4629	0.000155011	NM_002015, NM_001001557, NM_213594, NM_002017, NM_002309, NM_004350, NM_033131, NM_003246, NM_006194, NM_001164, NM_001136022, NM_021105, NM_001136021, NM_003151, NM_014212, NM_002501, NM_145902, NM_145901, NM_145903, NM_032638, NM_024015, NM_014945, NM_001130834, NM_053001, NM_001166176, NM_001077261, NM_001166175, NM_000799, NM_021926, NM_007254, NM_023110, NM_172349, NM_002698, NM_022455, NM_1…	564	1510	15185	1.49775	0.595657	0.0152301	0.00299397
GO:0048706~embryonic skeletal system development	15	2.22552	0.000155588	NM_024015, NM_001142462, NM_172037, NM_005593, NM_002147, NM_033150, NM_006492, NM_053001, NR_003084, NM_006896, NM_022564, NM_004503, NM_005941, NM_006902, NM_001844, NM_014212, NM_002010, NM_021926, NM_153693, NM_022716	564	121	15185	3.33766	0.597017	0.0150335	0.0030051
GO:0051716~cellular response to stimulus	277	41.0979	0.000157181	NM_182932, NM_213594, NM_080865, NM_002387, NM_016463, NM_001136022, NM_006346, NM_001136021, NM_006203, NM_032638, NM_001145645, NM_198517, NM_130843, NM_130842, NM_005348, NM_024736, NM_001033886, NM_148919, NM_001127511, NM_000247, NM_013416, NM_032641, NM_001127216, NM_001127510, NM_006225, NM_080797, NM_006497, NM_006209, NM_001702, NM_058240, NM_001706, NM_006312, NM_005990, NM_005475, NM_0…	564	6309	15185	1.1821	0.600749	0.0149392	0.00303581
GO:0048534~hematopoietic or lymphoid organ development	48	7.12166	0.000163191	NM_002305, NM_182932, NM_004310, NR_024043, NM_003495, NM_005583, NM_002017, NM_003394, NR_027353, NM_002309, NM_004350, NM_003540, NM_033131, NM_002308, NM_001033952, NM_032415, NM_003821, NM_003636, NM_000885, NM_009587, NM_001033953, NM_004443, NM_032638, NM_024015, NM_033262, NM_032531, NM_001768, NM_001166176, NM_001166175, NM_006060, NM_006871, NM_000799, NM_031944, NM_000138, NM_001130845,…	564	730	15185	1.77033	0.614523	0.0152578	0.00315172
GO:0051173~positive regulation of nitrogen compound metabolic process	91	13.5015	0.000164094	NM_002015, NM_001001557, NM_213594, NM_000906, NM_002017, NM_002903, NM_002309, NM_004350, NM_033131, NM_003246, NM_006194, NM_001164, NM_001136022, NM_021105, NM_001136021, NM_003151, NM_014212, NM_002501, NM_145902, NM_145901, NM_145903, NM_032638, NM_024015, NM_014945, NM_001130834, NM_053001, NM_001166176, NM_005348, NM_001077261, NM_001166175, NM_000799, NM_021926, NM_007254, NM_023110, NM_1…	564	1672	15185	1.46535	0.616552	0.0150999	0.00316913
GO:0030097~hemopoiesis	46	6.82493	0.00017244	NM_002305, NM_182932, NM_004310, NR_024043, NM_003495, NM_005583, NM_002017, NM_003394, NR_027353, NM_002309, NM_004350, NM_003540, NM_033131, NM_002308, NM_001033952, NM_032415, NM_003821, NM_003636, NM_000885, NM_009587, NM_001033953, NM_032638, NM_024015, NM_033262, NM_032531, NM_001768, NM_001166176, NM_001166175, NM_006060, NM_006871, NM_000799, NM_031944, NM_000138, NM_001130845, NM_003126,…	564	691	15185	1.79232	0.634799	0.015616	0.00333006
GO:0007166~cell surface receptor signaling pathway	124	18.3976	0.000174113	NM_001001557, NM_213594, NM_017806, NM_000609, NM_003246, NM_147156, NM_147150, NM_002387, NM_001136022, NM_001136021, NM_003152, NM_000885, NM_003151, NM_006203, NM_032638, NM_000610, NM_001144769, NM_001145645, NM_006869, NM_003745, NM_005348, NM_147164, NM_000797, NM_001104631, NM_001033886, NM_023110, NM_148919, NM_001127511, NM_002796, NM_013416, NM_001127216, NM_003277, NM_023108, NM_023105…	564	2448	15185	1.36379	0.638351	0.0155256	0.00336232
GO:0045944~positive regulation of transcription from RNA polymerase II promoter	60	8.90208	0.000184432	NM_002015, NM_213594, NM_002017, NM_000545, NM_021961, NM_003394, NM_002309, NM_033131, NM_006237, NM_006194, NM_003821, NM_001164, NM_001136022, NM_021105, NM_001136021, NM_003151, NM_014212, NM_002501, NM_145902, NM_145901, NM_145903, NM_032638, NM_024015, NM_000333, NM_001142462, NM_014945, NM_001128149, NM_014587, NM_005593, NM_002147, NM_001130834, NM_003884, NM_053001, NM_001166176, NM_0011…	564	987	15185	1.6367	0.659508	0.0161912	0.00356125
GO:0031327~negative regulation of cellular biosynthetic process	77	11.4243	0.000184675	NM_002015, NM_001014434, NM_004350, NM_003540, NM_003534, NM_003533, NM_006194, NM_003531, NM_016463, NM_001136022, NM_006346, NM_001136021, NM_173485, NM_002501, NM_145902, NM_145901, NM_017521, NM_145903, NM_032638, NM_024015, NM_016135, NM_014634, NM_053001, NM_001166176, NM_001077261, NM_001166175, NM_130439, NM_000799, NM_000797, NM_001012614, NM_002010, NM_001008541, NM_023110, NM_172349, N…	564	1361	15185	1.52324	0.659993	0.0159724	0.00356595
GO:0065007~biological regulation	428	63.5015	0.000188441	NM_001014434, NM_007337, NM_182932, NM_213594, NM_004350, NM_080865, NM_002387, NM_016463, NM_001136022, NM_001040444, NM_006346, NM_001136021, NM_001040443, NM_006203, NM_001013626, NM_001004019, NM_017521, NM_032638, NM_001145645, NM_198517, NM_001135649, NM_016135, NM_130843, NM_130842, NM_001725, NM_005348, NM_207322, NM_130439, NM_001033677, NM_024736, NM_001165035, NM_001033886, NM_005072, …	564	10492	15185	1.0983	0.66739	0.0160577	0.00363853
GO:0009890~negative regulation of biosynthetic process	78	11.5727	0.000189201	NM_002015, NM_001014434, NM_004350, NM_003540, NM_003534, NM_003533, NM_006194, NM_003531, NM_016463, NM_001136022, NM_006346, NM_001164, NM_001136021, NM_173485, NM_002501, NM_145902, NM_145901, NM_017521, NM_145903, NM_032638, NM_024015, NM_016135, NM_014634, NM_053001, NM_001166176, NM_001077261, NM_001166175, NM_130439, NM_000799, NM_000797, NM_001012614, NM_002010, NM_001008541, NM_023110, N…	564	1384	15185	1.51738	0.668864	0.0158902	0.00365318
GO:1902680~positive regulation of RNA biosynthetic process	74	10.9792	0.000198033	NM_002015, NM_213594, NM_001001557, NM_002017, NM_002309, NM_004350, NM_033131, NM_006194, NM_001136022, NM_001164, NM_021105, NM_001136021, NM_003151, NM_014212, NM_002501, NM_145902, NM_145901, NM_145903, NM_032638, NM_024015, NM_014945, NM_001130834, NM_053001, NM_001166176, NM_001166175, NM_000799, NM_021926, NM_172349, NM_002698, NM_022455, NM_152795, NM_022462, NM_004991, NM_001989, NM_0309…	564	1297	15185	1.53613	0.685518	0.0163903	0.00382341
GO:0031328~positive regulation of cellular biosynthetic process	89	13.2047	0.000198726	NM_002015, NM_001001557, NM_213594, NM_000906, NM_002017, NM_002903, NM_002309, NM_004350, NM_033131, NM_003246, NM_006194, NM_001164, NM_001136022, NM_021105, NM_001136021, NM_003151, NM_014212, NM_002501, NM_145902, NM_145901, NM_145903, NM_032638, NM_024015, NM_014945, NM_001130834, NM_053001, NM_001166176, NM_005348, NM_001077261, NM_001166175, NM_000799, NM_021926, NM_007254, NM_023110, NM_1…	564	1635	15185	1.46557	0.686787	0.0162174	0.00383676
GO:0050776~regulation of immune response	50	7.4184	0.000202977	NR_024043, NM_138982, NM_002209, NM_138980, NM_001004196, NM_017806, NM_006113, NM_001775, NM_002116, NR_027353, NR_026750, NM_002308, NM_018950, NM_016083, NM_032415, NM_003821, NM_021105, NM_001136021, NM_000885, NM_006203, NM_004159, NM_009587, NM_001160259, NM_001160258, NM_006573, NM_032638, NM_001432, NM_001145645, NM_005720, NM_004155, NM_145182, NM_001768, NM_001114380, NM_003745, NM_0032…	564	779	15185	1.7281	0.694471	0.0163333	0.00391869
GO:0050776~regulation of immune response	50	7.4184	0.000202977	NR_024043, NM_138982, NM_002209, NM_138980, NM_001004196, NM_017806, NM_006113, NM_001775, NM_002116, NR_027353, NR_026750, NM_002308, NM_018950, NM_016083, NM_032415, NM_003821, NM_021105, NM_001136021, NM_000885, NM_006203, NM_004159, NM_009587, NM_001160259, NM_001160258, NM_006573, NM_032638, NM_001432, NM_001145645, NM_005720, NM_004155, NM_145182, NM_001768, NM_001114380, NM_003745, NM_0032…	564	779	15185	1.7281	0.694471	0.0163333	0.00391869
GO:0010558~negative regulation of macromolecule biosynthetic process	74	10.9792	0.000214682	NM_002015, NM_001014434, NM_004350, NM_003540, NM_003534, NM_003533, NM_006194, NM_003531, NM_016463, NM_001136022, NM_001164, NM_001136021, NM_173485, NM_002501, NM_145902, NM_145901, NM_017521, NM_145903, NM_032638, NM_024015, NM_016135, NM_014634, NM_053001, NM_001166176, NM_001077261, NM_001166175, NM_130439, NM_000799, NM_001012614, NM_002010, NM_001008541, NM_023110, NM_172349, NM_005170, N…	564	1301	15185	1.53141	0.714665	0.0170326	0.00414421
GO:0045934~negative regulation of nucleobase-containing compound metabolic process	72	10.6825	0.00021804	NM_002015, NM_001014434, NM_004350, NM_003540, NM_003534, NM_003533, NM_006194, NM_003531, NM_016463, NM_001136022, NM_001136021, NM_173485, NM_002501, NM_145902, NM_145901, NM_017521, NM_145903, NM_032638, NM_024015, NM_016135, NM_014634, NM_053001, NM_001166176, NM_001077261, NM_001166175, NM_130439, NM_000799, NM_000797, NM_001012614, NM_002010, NM_001008541, NM_023110, NM_172349, NM_005170, N…	564	1256	15185	1.5434	0.720209	0.0170651	0.00420892
GO:0050671~positive regulation of lymphocyte proliferation	15	2.22552	0.000219897	NM_006573, NR_024043, NM_001145645, NM_001130845, NM_003126, NM_145182, NM_006113, NM_001775, NM_002116, NM_001706, NM_033131, NM_001013838, NM_000215, NM_013258, NM_002308, NM_032415, NM_003821, NM_000799, NM_001136021, NM_009587	564	125	15185	3.23085	0.723227	0.0169816	0.00424468
GO:0009891~positive regulation of biosynthetic process	90	13.3531	0.000221797	NM_002015, NM_001001557, NM_213594, NM_000906, NM_002017, NM_002903, NM_002309, NM_004350, NM_033131, NM_003246, NM_006194, NM_001164, NM_001136022, NM_021105, NM_001136021, NM_003151, NM_014212, NM_002501, NM_145902, NM_145901, NM_145903, NM_032638, NM_024015, NM_014945, NM_001130834, NM_053001, NM_001166176, NM_005348, NM_001077261, NM_001166175, NM_000799, NM_021926, NM_007254, NM_023110, NM_1…	564	1663	15185	1.45709	0.726283	0.0169037	0.00428128
GO:0048598~embryonic morphogenesis	39	5.78635	0.000225863	NM_001129829, NM_000545, NM_001129827, NM_006783, NM_014620, NM_033131, NM_000885, NM_014212, NM_032638, NM_024015, NM_001144759, NM_001144758, NM_001142462, NM_014587, NM_005593, NM_002147, NM_001005731, NM_001110221, NM_053001, NM_001110220, NM_000719, NM_001166176, NM_001166175, NM_023111, NM_022564, NM_023067, NM_031944, NM_003955, NM_002010, NM_021926, NM_000138, NM_000209, NM_001110219, NM_…	564	557	15185	1.88515	0.732708	0.0169893	0.0043596
GO:0032946~positive regulation of mononuclear cell proliferation	15	2.22552	0.000239156	NM_006573, NR_024043, NM_001145645, NM_001130845, NM_003126, NM_145182, NM_006113, NM_001775, NM_002116, NM_001706, NM_033131, NM_001013838, NM_000215, NM_013258, NM_002308, NM_032415, NM_003821, NM_000799, NM_001136021, NM_009587	564	126	15185	3.20521	0.752681	0.0177518	0.00461562
GO:0045935~positive regulation of nucleobase-containing compound metabolic process	86	12.7596	0.000242639	NM_002015, NM_001001557, NM_213594, NM_000906, NM_002017, NM_002903, NM_002309, NM_004350, NM_033131, NM_006194, NM_001164, NM_001136022, NM_021105, NM_001136021, NM_003151, NM_014212, NM_002501, NM_145902, NM_145901, NM_145903, NM_032638, NM_024015, NM_014945, NM_001130834, NM_053001, NM_001166176, NM_001166175, NM_000799, NM_021926, NM_007254, NM_023110, NM_172349, NM_002698, NM_022455, NM_1527…	564	1576	15185	1.46919	0.757663	0.0177821	0.00468269
GO:0048705~skeletal system morphogenesis	20	2.96736	0.000244362	NM_023110, NM_172037, NM_000660, NM_003394, NM_033150, NM_001003845, NM_005328, NM_023108, NM_023105, NM_001844, NM_014212, NM_023107, NM_023106, NM_024015, NM_001142462, NM_005593, NM_002147, NM_005221, NM_053001, NM_006492, NM_019558, NM_023111, NM_006896, NM_022564, NM_005967, NM_005941, NM_006902, NM_015850, NM_021926, NM_022716	564	206	15185	2.61396	0.760091	0.0176854	0.00471588
GO:2000113~negative regulation of cellular macromolecule biosynthetic process	70	10.3858	0.000279549	NM_002015, NM_001014434, NM_004350, NM_003540, NM_003534, NM_006194, NM_003533, NM_003531, NM_016463, NM_001136022, NM_001136021, NM_173485, NM_002501, NM_145902, NM_145901, NM_145903, NM_032638, NM_024015, NM_016135, NM_014634, NM_053001, NM_001166176, NM_001077261, NM_001166175, NM_000799, NM_001012614, NM_002010, NM_023110, NM_172349, NM_005170, NM_022455, NM_004991, NM_001127216, NM_139211, N…	564	1222	15185	1.54228	0.804672	0.0199595	0.0053932
GO:0007399~nervous system development	106	15.727	0.000311645	NM_001134407, NM_002305, NM_001077182, NM_001134408, NM_182932, NM_001014434, NM_000905, NM_213594, NM_001001557, NM_020443, NM_206862, NM_000609, NM_206860, NM_003247, NM_004350, NM_002309, NM_033131, NM_206861, NM_000582, NM_001130138, NM_001130137, NM_016083, NM_001167738, NM_001136022, NM_001164, NM_001160259, NM_005010, NM_001160258, NM_001130136, NM_001002919, NM_017521, NM_032638, NM_03326…	564	2052	15185	1.3908	0.838072	0.0219578	0.00601065
GO:0051254~positive regulation of RNA metabolic process	75	11.1276	0.000339168	NM_002015, NM_213594, NM_001001557, NM_002017, NM_002309, NM_004350, NM_033131, NM_006194, NM_001136022, NM_001164, NM_021105, NM_001136021, NM_003151, NM_014212, NM_002501, NM_145902, NM_145901, NM_145903, NM_032638, NM_024015, NM_014945, NM_001130834, NM_053001, NM_001166176, NM_001166175, NM_000799, NM_021926, NM_172349, NM_002698, NM_022455, NM_152795, NM_022462, NM_004991, NM_001989, NM_0309…	564	1343	15185	1.50356	0.862127	0.0235898	0.00653983
GO:0045944~positive regulation of transcription from RNA polymerase II promoter	56	8.30861	0.000378594	NM_002015, NM_213594, NM_002017, NM_000545, NM_002309, NM_033131, NM_006237, NM_006194, NM_003821, NM_001164, NM_001136022, NM_021105, NM_001136021, NM_003151, NM_014212, NM_002501, NM_145902, NM_145901, NM_145903, NM_032638, NM_024015, NM_000333, NM_001142462, NM_014945, NM_001128149, NM_014587, NM_005593, NM_002147, NM_001130834, NM_003884, NM_053001, NM_001166176, NM_001166175, NM_006060, NM_0…	564	928	15185	1.62471	0.619964	0.175929	0.00667421
GO:0030198~extracellular matrix organization	26	3.85757	0.000359791	NM_014244, NM_002209, NM_007361, NM_000660, NM_033150, NM_001040058, NM_001164489, NM_002639, NM_033131, NM_001013838, NM_000582, NM_003246, NM_021599, NM_001849, NM_005328, NM_019105, NM_000885, NM_001001390, NM_001844, NM_001001391, NM_058174, NM_001001392, NM_058175, NM_000610, NM_001144759, NM_001748, NM_001144758, NM_005803, NM_015157, NM_005593, NM_001001389, NM_001005731, NM_001146068, NM_…	564	319	15185	2.19441	0.877778	0.0247124	0.00693617
GO:0051960~regulation of nervous system development	47	6.97329	0.000362216	NM_002305, NM_213594, NM_001001557, NM_152731, NM_000609, NM_002309, NM_003247, NM_033131, NM_006237, NM_000582, NM_001130138, NM_016083, NM_001130137, NM_001136022, NM_001164, NM_003966, NM_005010, NM_001160259, NM_001160258, NM_004443, NM_001130136, NM_001002919, NM_032638, NM_153498, NM_014587, NM_020397, NM_003380, NM_003235, NM_001166176, NM_001166175, NM_023111, NM_015085, NM_000799, NR_027…	564	736	15185	1.71932	0.879497	0.0245878	0.00698275
GO:0051960~regulation of nervous system development	47	6.97329	0.000362216	NM_002305, NM_213594, NM_001001557, NM_152731, NM_000609, NM_002309, NM_003247, NM_033131, NM_006237, NM_000582, NM_001130138, NM_016083, NM_001130137, NM_001136022, NM_001164, NM_003966, NM_005010, NM_001160259, NM_001160258, NM_004443, NM_001130136, NM_001002919, NM_032638, NM_153498, NM_014587, NM_020397, NM_003380, NM_003235, NM_001166176, NM_001166175, NM_023111, NM_015085, NM_000799, NR_027…	564	736	15185	1.71932	0.879497	0.0245878	0.00698275
GO:0043062~extracellular structure organization	26	3.85757	0.000378542	NM_014244, NM_002209, NM_007361, NM_000660, NM_033150, NM_001040058, NM_001164489, NM_002639, NM_033131, NM_001013838, NM_000582, NM_003246, NM_021599, NM_001849, NM_005328, NM_019105, NM_000885, NM_001001390, NM_001844, NM_001001391, NM_058174, NM_001001392, NM_058175, NM_000610, NM_001144759, NM_001748, NM_001144758, NM_005803, NM_015157, NM_005593, NM_001001389, NM_001005731, NM_001146068, NM_…	564	320	15185	2.18756	0.890462	0.0253871	0.0072964
GO:0070665~positive regulation of leukocyte proliferation	15	2.22552	0.00038796	NM_006573, NR_024043, NM_001145645, NM_001130845, NM_003126, NM_145182, NM_006113, NM_001775, NM_002116, NM_001706, NM_033131, NM_001013838, NM_000215, NM_013258, NM_002308, NM_032415, NM_003821, NM_000799, NM_001136021, NM_009587	564	132	15185	3.05952	0.896327	0.0257155	0.00747729
GO:0009888~tissue development	89	13.2047	0.000400025	NM_002015, NM_001001557, NM_002309, NM_014620, NM_004350, NM_033131, NM_000582, NM_006194, NM_001136022, NM_000885, NM_006203, NM_014212, NM_004159, NM_032638, NM_024015, NM_000610, NM_001130834, NM_053001, NM_001166176, NM_001130064, NM_001166175, NM_183374, NM_001104631, NM_021926, NM_152989, NM_002010, NM_023110, NM_148919, NM_002796, NM_005170, NM_001031847, NM_033150, NM_053013, NM_139211, N…	564	1670	15185	1.43486	0.903384	0.0259168	0.00770896
GO:0022409~positive regulation of cell-cell adhesion	21	3.11573	0.000411189	NM_002305, NR_024043, NM_003126, NM_000660, NM_002116, NM_001164489, NM_033131, NM_001013838, NM_002308, NM_032415, NM_005328, NM_003821, NM_000885, NM_001001390, NM_001001391, NM_009587, NM_001001392, NM_006573, NM_000610, NM_001145645, NM_005803, NM_145182, NM_012334, NM_001001389, NM_005018, NM_004445, NM_000215, NM_013258, NM_001164490, NM_000799, NM_001109	564	232	15185	2.43706	0.909486	0.0263386	0.0079233
GO:0010959~regulation of metal ion transport	25	3.7092	0.000443685	NM_018398, NM_001129829, NM_002903, NM_172364, NM_001129827, NM_000609, NM_033131, NM_001033952, NM_001164605, NM_173584, NM_003636, NM_000848, NM_006203, NM_001033953, NM_173354, NR_028406, NM_020164, NM_001142368, NM_000719, NM_001166176, NM_144779, NM_001164752, NM_001166175, NM_001164753, NM_001164750, NM_014164, NM_001164751, NM_000799, NM_175929, NM_000797, NM_004318, NM_001104631, NM_00116…	564	305	15185	2.20687	0.92514	0.0280831	0.00854692
GO:0010959~regulation of metal ion transport	25	3.7092	0.000443685	NM_018398, NM_001129829, NM_002903, NM_172364, NM_001129827, NM_000609, NM_033131, NM_001033952, NM_001164605, NM_173584, NM_003636, NM_000848, NM_006203, NM_001033953, NM_173354, NR_028406, NM_020164, NM_001142368, NM_000719, NM_001166176, NM_144779, NM_001164752, NM_001166175, NM_001164753, NM_001164750, NM_014164, NM_001164751, NM_000799, NM_175929, NM_000797, NM_004318, NM_001104631, NM_00116…	564	305	15185	2.20687	0.92514	0.0280831	0.00854692
GO:0050794~regulation of cellular process	391	58.0119	0.000446175	NM_007337, NM_182932, NM_001014434, NM_213594, NM_004350, NM_080865, NM_002387, NM_016463, NM_001136022, NM_001040444, NM_006346, NM_001136021, NM_001040443, NM_006203, NM_001013626, NM_017521, NM_032638, NM_001145645, NM_198517, NM_001135649, NM_016135, NM_001725, NM_005348, NM_207322, NM_130439, NM_024736, NM_001033886, NM_148919, NM_001127511, NM_000247, NM_013416, NM_032641, NM_001127216, NM_…	564	9508	15185	1.10719	0.926222	0.0279359	0.00859469
GO:0050921~positive regulation of chemotaxis	5	0.74184	0.000501028	NM_000660, NM_002609, NM_004177, NM_014634, NM_003246	564	11	15185	12.2381	0.722087	0.192173	0.00882358
GO:0043269~regulation of ion transport	36	5.34125	0.000474616	NM_018398, NM_002903, NM_172364, NM_000609, NM_033131, NM_003246, NM_053277, NM_016083, NM_173584, NM_003636, NM_006203, NM_001160259, NM_001135111, NM_001160258, NM_153763, NM_001166176, NM_000719, NM_144779, NM_001166175, NM_014164, NM_004978, NM_000083, NM_000799, NM_000797, NM_001104631, NM_001033886, NM_007117, NM_172130, NM_130797, NM_199168, NM_004518, NM_001165899, NM_031460, NM_147182, N…	564	519	15185	1.86754	0.937519	0.0293759	0.00914017
GO:0022407~regulation of cell-cell adhesion	28	4.1543	0.000486329	NM_002305, NR_024043, NM_001130845, NM_003126, NM_014387, NM_000660, NM_002116, NM_000609, NM_001164489, NM_033131, NM_001013838, NM_002308, NM_005328, NM_032415, NM_003821, NM_199168, NM_000885, NM_001001390, NM_001001391, NM_009587, NM_001001392, NM_004443, NM_006573, NM_000610, NM_001145645, NM_005803, NM_145182, NM_012334, NM_001014988, NM_001001389, NM_001014987, NM_001014989, NM_001706, NM_…	564	363	15185	2.07676	0.941653	0.0297748	0.00936475
GO:0006468~protein phosphorylation	92	13.6499	0.000503659	NM_001134407, NM_002015, NM_001134408, NR_024043, NM_001001557, NM_000906, NM_002309, NM_004350, NM_033131, NM_002308, NM_003246, NM_006346, NM_003152, NM_004864, NM_006203, NM_009587, NM_004159, NM_001002919, NM_000610, NM_198517, NM_001040092, NM_014634, NM_003745, NM_005348, NM_006871, NM_000799, NM_000797, NM_002220, NM_001012614, NM_030968, NM_001995, NM_001104631, NM_002010, NM_198594, NM_0…	564	1752	15185	1.4138	0.947272	0.0305001	0.00969691
GO:0006935~chemotaxis	36	5.34125	0.000538059	NM_001014434, NR_024043, NM_001130863, NM_006113, NM_000609, NM_033131, NM_002308, NM_003246, NM_001033952, NM_003966, NM_006203, NM_005010, NM_009587, NM_001033953, NM_004443, NM_153498, NM_020397, NM_013447, NM_014634, NM_001040092, NM_001130064, NM_023111, NM_012445, NM_003956, NM_001104631, NM_001033886, NM_144673, NM_004755, NM_199131, NM_023110, NM_003126, NM_000660, NM_152921, NM_030753, N…	564	522	15185	1.85681	0.956875	0.0318892	0.0103559
GO:0009790~embryo development	55	8.16024	0.000551709	NM_002309, NM_014620, NM_033131, NR_003084, NM_000885, NM_014212, NM_002406, NM_032638, NM_024015, NM_001144759, NM_001144758, NM_053001, NM_000719, NM_001166176, NM_001166175, NM_001114618, NM_001114619, NM_001114617, NM_002010, NM_021926, NM_023110, NM_005170, NM_033150, NM_001989, NM_139211, NM_002729, NM_139212, NM_001114620, NM_023108, NM_023105, NM_023107, NM_023106, NM_003904, NM_006225, N…	564	921	15185	1.60782	0.960181	0.032357	0.0106173
GO:0042330~taxis	36	5.34125	0.000559261	NM_001014434, NR_024043, NM_001130863, NM_006113, NM_000609, NM_033131, NM_002308, NM_003246, NM_001033952, NM_003966, NM_006203, NM_005010, NM_009587, NM_001033953, NM_004443, NM_153498, NM_020397, NM_013447, NM_014634, NM_001040092, NM_001130064, NM_023111, NM_012445, NM_003956, NM_001104631, NM_001033886, NM_144673, NM_004755, NM_199131, NM_023110, NM_003126, NM_000660, NM_152921, NM_030753, N…	564	523	15185	1.85326	0.961901	0.0324669	0.0107619
GO:0040011~locomotion	79	11.7211	0.000578253	NM_001134407, NM_001077182, NM_001134408, NM_001014434, NR_024043, NM_002209, NM_020443, NM_006113, NM_000609, NM_033131, NM_003246, NM_002308, NM_001167738, NM_002387, NM_001136021, NM_003152, NM_000885, NM_006203, NM_009587, NM_005010, NM_032638, NM_000610, NM_001144769, NM_032531, NM_001114380, NM_001040092, NM_001130834, NM_014634, NM_001130064, NM_005348, NM_001175, NM_006871, NM_012445, NM_…	564	1459	15185	1.45783	0.965903	0.0332212	0.0111255
GO:0048704~embryonic skeletal system morphogenesis	12	1.78042	0.000584334	NM_024015, NM_001142462, NM_005593, NM_172037, NM_002147, NM_033150, NM_006492, NM_053001, NM_006896, NM_022564, NM_005941, NM_006902, NM_001844, NM_014212, NM_021926, NM_022716	564	92	15185	3.51179	0.967094	0.0332379	0.0112418
GO:0030155~regulation of cell adhesion	40	5.93472	0.000598281	NM_002305, NR_024043, NM_006113, NM_002116, NM_000609, NM_033131, NM_002308, NM_003246, NM_032415, NM_003821, NM_001164605, NM_003966, NM_000885, NM_001001390, NM_001001391, NM_009587, NM_001001392, NM_004443, NM_001004019, NM_006573, NM_000610, NM_001145645, NM_145182, NR_028406, NM_005593, NM_001001389, NM_014634, NM_013258, NM_144779, NM_014164, NM_001175, NM_006871, NM_000799, NM_001998, NM_0…	564	607	15185	1.77422	0.96967	0.0336901	0.0115087
GO:0048523~negative regulation of cellular process	184	27.2997	0.000623229	NM_003834, NM_007337, NM_001014434, NR_024043, NM_213594, NM_172365, NM_000609, NM_003540, NM_004350, NM_003246, NM_003534, NM_003533, NM_006194, NM_147156, NM_003531, NM_002387, NM_016463, NM_001136022, NM_006346, NM_001136021, NM_173485, NM_006203, NM_001160259, NM_009587, NM_001160258, NM_017521, NM_032638, NM_000610, NM_198517, NM_016135, NM_001725, NM_003745, NM_053001, NM_130439, NM_014164,…	564	4012	15185	1.23479	0.973785	0.0347359	0.0119858
GO:0050670~regulation of lymphocyte proliferation	18	2.67062	0.00063989	NM_006573, NR_024043, NM_001145645, NM_001130845, NM_003126, NM_145182, NM_006113, NM_000660, NM_001775, NM_002116, NM_001706, NM_033131, NM_001013838, NM_002741, NM_000215, NM_002308, NM_013258, NM_032415, NM_003821, NM_006871, NM_000799, NM_001136021, NM_009587	564	188	15185	2.57781	0.976217	0.0353114	0.0123044
GO:0032944~regulation of mononuclear cell proliferation	18	2.67062	0.000679603	NM_006573, NR_024043, NM_001145645, NM_001130845, NM_003126, NM_145182, NM_006113, NM_000660, NM_001775, NM_002116, NM_001706, NM_033131, NM_001013838, NM_002741, NM_000215, NM_002308, NM_013258, NM_032415, NM_003821, NM_006871, NM_000799, NM_001136021, NM_009587	564	189	15185	2.56417	0.981144	0.037112	0.0130633
GO:0001816~cytokine production	39	5.78635	0.000725606	NR_024043, NM_002116, NM_033131, NM_002308, NM_003246, NM_032415, NM_001033952, NM_003821, NM_006346, NM_001136022, NM_001136021, NM_006203, NM_009587, NM_001033953, NM_001164346, NM_001164345, NM_001164344, NM_001432, NM_001164343, NM_145182, NM_198828, NM_001725, NM_003745, NM_001164347, NM_013258, NM_001033053, NM_023111, NM_006871, NM_024736, NM_012445, NM_007199, NM_001104631, NM_001166237, …	564	592	15185	1.77369	0.98559	0.0392088	0.0139417
GO:0050867~positive regulation of cell activation	23	3.41246	0.000736689	NM_002305, NR_024043, NM_001130845, NM_003126, NM_006113, NM_000660, NM_001775, NM_002116, NM_001164489, NM_033131, NM_001013838, NM_003246, NM_002308, NM_032415, NM_003821, NM_001136021, NM_009587, NM_006573, NM_032638, NM_001145645, NM_145182, NM_001145661, NM_002609, NM_001145662, NM_001706, NM_005018, NM_004445, NM_000215, NM_013258, NM_001164490, NM_000799, NM_001109	564	279	15185	2.21952	0.986494	0.0394313	0.0141532
GO:0001775~cell activation	50	7.4184	0.000750001	NM_002305, NM_004310, NR_024043, NM_002209, NM_005583, NM_001004196, NM_006113, NM_001775, NM_002116, NR_027353, NM_033131, NM_002308, NM_003246, NM_016083, NM_032415, NM_003821, NM_006346, NM_021105, NM_001136021, NM_000885, NM_001160259, NM_009587, NM_001160258, NM_006573, NM_032638, NM_001145645, NM_198517, NM_145182, NM_001768, NM_001114380, NM_001725, NM_013258, NM_006060, NM_006871, NM_0007…	564	826	15185	1.62977	0.987505	0.0397655	0.0144072
GO:0002274~myeloid leukocyte activation	15	2.22552	0.000755751	NM_004310, NR_024043, NM_014387, NM_001004196, NM_000660, NM_003246, NM_002308, NM_016083, NM_012072, NM_001160259, NM_009587, NM_001160258, NM_004946, NM_032638, NM_145182, NM_001014988, NM_001014987, NM_001145661, NM_001014989, NM_001145662, NM_001725, NM_001744, NM_013258, NM_005026, NM_005944, NM_001160226, NM_139022	564	141	15185	2.86423	0.987918	0.0397042	0.0145169
GO:0009887~organ morphogenesis	56	8.30861	0.00080973	NM_002015, NM_001077182, NM_001014434, NM_000545, NM_002017, NM_003394, NM_001130861, NM_006783, NM_002639, NM_002309, NM_014620, NM_033131, NM_006237, NM_006194, NM_014212, NM_004159, NM_032638, NM_024015, NM_017565, NM_001432, NM_001142462, NM_014587, NM_016135, NM_005593, NM_002147, NM_001005731, NM_053001, NM_001110221, NM_001110220, NM_001166176, NM_001166175, NM_023111, NM_022564, NM_023067…	564	959	15185	1.57219	0.991187	0.0421021	0.015546
GO:0009887~organ morphogenesis	56	8.30861	0.00080973	NM_002015, NM_001077182, NM_001014434, NM_000545, NM_002017, NM_003394, NM_001130861, NM_006783, NM_002639, NM_002309, NM_014620, NM_033131, NM_006237, NM_006194, NM_014212, NM_004159, NM_032638, NM_024015, NM_017565, NM_001432, NM_001142462, NM_014587, NM_016135, NM_005593, NM_002147, NM_001005731, NM_053001, NM_001110221, NM_001110220, NM_001166176, NM_001166175, NM_023111, NM_022564, NM_023067…	564	959	15185	1.57219	0.991187	0.0421021	0.015546
GO:0048562~embryonic organ morphogenesis	23	3.41246	0.000815398	NM_001110219, NM_023110, NM_172037, NM_033150, NM_006783, NM_014620, NM_033131, NM_004387, NM_023108, NM_023105, NM_001844, NM_023107, NM_014212, NM_023106, NM_024015, NM_032638, NM_001142462, NM_005519, NM_005593, NM_002147, NM_001145661, NM_001145662, NM_005221, NM_006492, NM_053001, NM_001110221, NM_001110220, NM_001166176, NM_001166175, NM_006896, NM_023111, NM_022564, NM_023067, NM_005941, N…	564	281	15185	2.20372	0.991474	0.0420168	0.015654
GO:0048562~embryonic organ morphogenesis	23	3.41246	0.000815398	NM_001110219, NM_023110, NM_172037, NM_033150, NM_006783, NM_014620, NM_033131, NM_004387, NM_023108, NM_023105, NM_001844, NM_023107, NM_014212, NM_023106, NM_024015, NM_032638, NM_001142462, NM_005519, NM_005593, NM_002147, NM_001145661, NM_001145662, NM_005221, NM_006492, NM_053001, NM_001110221, NM_001110220, NM_001166176, NM_001166175, NM_006896, NM_023111, NM_022564, NM_023067, NM_005941, N…	564	281	15185	2.20372	0.991474	0.0420168	0.015654
GO:0048468~cell development	96	14.2433	0.000903815	NM_002305, NM_001077182, NM_001014434, NM_000905, NM_001001557, NM_002017, NM_000609, NM_002309, NM_004350, NM_033131, NM_000582, NM_001130138, NM_001130137, NM_016083, NM_001164, NM_001136022, NM_001136021, NM_000885, NM_004864, NM_006203, NM_001160259, NM_005010, NM_001160258, NM_001130136, NM_017521, NM_001002919, NM_032638, NM_001144759, NM_001144758, NM_032531, NM_000275, NM_001166176, NM_00…	564	1878	15185	1.37629	0.994916	0.0460623	0.0173374
GO:0048583~regulation of response to stimulus	157	23.2938	0.000929472	NM_003834, NR_024043, NM_213594, NM_001001557, NM_001045557, NM_001045556, NM_017806, NM_000609, NM_003246, NM_147156, NM_002387, NM_016463, NM_001136022, NM_006346, NM_001136021, NM_000885, NM_006203, NM_001160259, NM_009587, NM_001160258, NM_001002919, NM_032638, NM_000610, NM_001145645, NM_198517, NM_003745, NM_005348, NM_006871, NM_000799, NM_000797, NM_012445, NM_001104631, NM_001033886, NM_…	564	3364	15185	1.25655	0.995624	0.0469301	0.0178254
GO:0008283~cell proliferation	90	13.3531	0.000964073	NM_002015, NM_007337, NM_001014434, NR_024043, NM_000905, NM_000906, NM_006113, NM_002116, NM_206862, NM_000609, NM_002309, NM_206860, NM_004350, NM_033131, NM_206861, NM_003246, NM_002308, NM_002387, NM_001136021, NM_003152, NM_000908, NM_009587, NM_145902, NM_145901, NM_145903, NM_032638, NM_024015, NM_001145645, NM_000275, NM_053001, NM_001166176, NM_001166175, NM_016073, NM_130439, NM_006871,…	564	1742	15185	1.39101	0.996425	0.0482186	0.0184831
GO:0030111~regulation of Wnt signaling pathway	24	3.56083	0.000990529	NM_002015, NM_053056, NM_148919, NM_001178, NM_002796, NM_001127511, NM_172388, NM_000545, NM_001085377, NM_172387, NM_003394, NM_030753, NM_172389, NM_004554, NM_033131, NM_018206, NM_001098202, NM_004387, NM_002729, NM_002387, NM_001136022, NM_004159, NM_001127510, NM_172390, NM_001080512, NM_006497, NM_005221, NM_001166176, NM_016356, NM_000038, NM_001166175, NM_001030273, NM_007191, NM_001030…	564	304	15185	2.12556	0.996938	0.0490894	0.0189858
GO:0006955~immune response	73	10.8309	0.000992873	NM_002305, NR_024043, NM_002209, NM_000905, NM_017806, NM_006113, NM_002116, NM_000609, NM_002309, NM_002308, NM_003246, NM_016083, NM_178014, NM_001136021, NM_021105, NM_006203, NM_009587, NM_004159, NM_001160259, NM_001160258, NM_032638, NM_000610, NM_001145645, NM_005720, NM_004155, NM_001114380, NM_001040092, NM_003745, NM_001725, NM_005348, NM_006871, NM_024736, NM_012445, NM_001104631, NM_0…	564	1347	15185	1.45912	0.996979	0.0487891	0.0190303
GO:0006955~immune response	73	10.8309	0.000992873	NM_002305, NR_024043, NM_002209, NM_000905, NM_017806, NM_006113, NM_002116, NM_000609, NM_002309, NM_002308, NM_003246, NM_016083, NM_178014, NM_001136021, NM_021105, NM_006203, NM_009587, NM_004159, NM_001160259, NM_001160258, NM_032638, NM_000610, NM_001145645, NM_005720, NM_004155, NM_001114380, NM_001040092, NM_003745, NM_001725, NM_005348, NM_006871, NM_024736, NM_012445, NM_001104631, NM_0…	564	1347	15185	1.45912	0.996979	0.0487891	0.0190303
GO:0065009~regulation of molecular function	129	19.1395	0.00101361	NM_003834, NR_024043, NM_014953, NM_014957, NM_172365, NM_003246, NM_006346, NM_001136022, NM_000885, NM_006203, NM_009587, NM_001160259, NM_001160258, NM_001013626, NM_001002919, NM_000610, NM_198517, NM_130843, NM_130842, NM_001130834, NM_006869, NM_003745, NM_005348, NM_014164, NM_006871, NM_000799, NM_001033677, NM_000797, NM_001104631, NM_023110, NM_172349, NM_148919, NM_003126, NM_001127511…	564	2679	15185	1.29644	0.997324	0.0493681	0.0194241
GO:0050789~regulation of biological process	403	59.7923	0.00102801	NM_007337, NM_182932, NM_001014434, NM_213594, NM_004350, NM_080865, NM_002387, NM_016463, NM_001136022, NM_001040444, NM_006346, NM_001136021, NM_001040443, NM_006203, NM_001013626, NM_001004019, NM_017521, NM_032638, NM_001145645, NM_198517, NM_001135649, NM_016135, NM_130843, NM_130842, NM_001725, NM_005348, NM_207322, NM_130439, NM_001033677, NM_024736, NM_001165035, NM_001033886, NM_138393, …	564	9920	15185	1.09378	0.99754	0.0496382	0.0196974
GO:0031324~negative regulation of cellular metabolic process	108	16.0237	0.00104215	NM_002015, NM_001014434, NM_172365, NM_003540, NM_004350, NM_002309, NM_052906, NM_003246, NM_003534, NM_003533, NM_006194, NM_016083, NM_003531, NM_016463, NM_001136022, NM_006346, NM_001136021, NM_173485, NM_006203, NM_002501, NM_001160259, NM_004159, NM_001160258, NM_145902, NM_145901, NM_145903, NM_017521, NM_032638, NM_024015, NM_000610, NM_004155, NM_198517, NM_016135, NM_014634, NM_003745,…	564	2172	15185	1.33875	0.997735	0.0498921	0.0199658
GO:0051249~regulation of lymphocyte activation	27	4.00593	0.00106927	NM_002305, NR_024043, NM_001130845, NM_003126, NM_014387, NM_000247, NM_000660, NM_006113, NM_001775, NM_002116, NM_001164489, NM_033131, NM_001013838, NM_002308, NM_032415, NM_003821, NM_006346, NM_001136021, NM_009587, NM_006573, NM_001145645, NM_198517, NM_145182, NM_001014988, NM_001014987, NM_001014989, NM_001706, NM_004445, NM_005018, NM_000215, NM_002741, NM_013258, NM_001744, NM_001164490…	564	363	15185	2.00259	0.998067	0.0507418	0.0204802
GO:0002683~negative regulation of immune system process	27	4.00593	0.00106927	NR_024043, NM_003495, NM_001130845, NM_002796, NM_000247, NM_001004196, NM_000660, NM_002116, NM_000609, NM_003540, NM_002308, NM_003246, NM_016083, NM_001033952, NM_006346, NM_199168, NM_001160259, NM_009587, NM_001160258, NM_022114, NM_001142523, NM_001033953, NM_032638, NM_004155, NM_198517, NM_001145661, NM_001145662, NM_001741, NM_001706, NM_001725, NM_005018, NM_000215, NM_002741, NM_006896…	564	363	15185	2.00259	0.998067	0.0507418	0.0204802
GO:0002696~positive regulation of leukocyte activation	22	3.26409	0.00114138	NM_002305, NR_024043, NM_001130845, NM_003126, NM_000660, NM_006113, NM_001775, NM_002116, NM_001164489, NM_033131, NM_001013838, NM_003246, NM_002308, NM_032415, NM_003821, NM_001136021, NM_009587, NM_006573, NM_032638, NM_001145645, NM_145182, NM_001145661, NM_001145662, NM_001706, NM_005018, NM_004445, NM_000215, NM_013258, NM_001164490, NM_000799, NM_001109	564	270	15185	2.19379	0.998732	0.0536372	0.0218471
GO:0070663~regulation of leukocyte proliferation	18	2.67062	0.00114244	NM_006573, NR_024043, NM_001145645, NM_001130845, NM_003126, NM_145182, NM_006113, NM_000660, NM_001775, NM_002116, NM_001706, NM_033131, NM_001013838, NM_002741, NM_000215, NM_002308, NM_013258, NM_032415, NM_003821, NM_006871, NM_000799, NM_001136021, NM_009587	564	198	15185	2.44761	0.99874	0.0532575	0.0218671
GO:1903037~regulation of leukocyte cell-cell adhesion	23	3.41246	0.0012295	NM_002305, NR_024043, NM_001130845, NM_003126, NM_014387, NM_000660, NM_002116, NM_000609, NM_001164489, NM_001013838, NM_002308, NM_032415, NM_005328, NM_003821, NM_199168, NM_000885, NM_001001390, NM_001001391, NM_009587, NM_001001392, NM_006573, NM_000610, NM_001145645, NM_145182, NM_001014988, NM_001001389, NM_001014987, NM_001014989, NM_001706, NM_005018, NM_004445, NM_000215, NM_001744, NM_…	564	290	15185	2.13533	0.999243	0.0567485	0.0235148
GO:0048565~digestive tract development	7	1.03858	0.00140266	NM_032638, NM_000209, NM_001136271, NM_000660, NM_001145661, NM_031944, NM_001005731, NM_001145662, NM_001005619, NM_000213, NM_021926	564	34	15185	5.54313	0.9723	0.400903	0.0245175
GO:0050767~regulation of neurogenesis	41	6.08309	0.00129535	NM_002305, NM_001001557, NM_152731, NM_000609, NM_002309, NM_033131, NM_006237, NM_000582, NM_001130138, NM_016083, NM_001130137, NM_001136022, NM_001164, NM_003966, NM_005010, NM_001160259, NM_001160258, NM_004443, NM_001130136, NM_001002919, NM_032638, NM_153498, NM_014587, NM_020397, NM_003380, NM_001166176, NM_001166175, NM_023111, NM_015085, NM_000799, NR_027767, NM_002220, NM_001033886, NM_…	564	653	15185	1.69047	0.999485	0.05923	0.0247591
GO:0050767~regulation of neurogenesis	41	6.08309	0.00129535	NM_002305, NM_001001557, NM_152731, NM_000609, NM_002309, NM_033131, NM_006237, NM_000582, NM_001130138, NM_016083, NM_001130137, NM_001136022, NM_001164, NM_003966, NM_005010, NM_001160259, NM_001160258, NM_004443, NM_001130136, NM_001002919, NM_032638, NM_153498, NM_014587, NM_020397, NM_003380, NM_001166176, NM_001166175, NM_023111, NM_015085, NM_000799, NR_027767, NM_002220, NM_001033886, NM_…	564	653	15185	1.69047	0.999485	0.05923	0.0247591
GO:0016337~single organismal cell-cell adhesion	42	6.23145	0.0013347	NM_002305, NM_004310, NR_024043, NM_002209, NM_002116, NM_000609, NR_027353, NM_033131, NM_002308, NM_032415, NM_001033952, NM_003821, NM_007183, NM_000885, NM_001001390, NM_001001391, NM_005010, NM_009587, NM_001001392, NM_001033953, NM_006573, NM_000610, NM_001145645, NM_145182, NM_001768, NM_001001389, NM_001114380, NM_013258, NM_006871, NM_000799, NM_030968, NM_198594, NM_001033886, NM_001130…	564	676	15185	1.67278	0.999591	0.0605021	0.0255023
GO:0070661~leukocyte proliferation	21	3.11573	0.00134484	NR_024043, NM_003126, NM_001130845, NM_000660, NM_006113, NM_001775, NM_002116, NM_033131, NM_001013838, NM_002308, NM_032415, NM_003821, NM_001136021, NM_000908, NM_009587, NM_004946, NM_006573, NM_001145645, NM_145182, NM_001706, NM_004445, NM_000215, NM_002741, NM_013258, NM_006871, NM_000799	564	255	15185	2.21725	0.999614	0.0604786	0.0256935
GO:0046649~lymphocyte activation	37	5.48961	0.00135597	NM_002305, NM_004310, NR_024043, NM_002209, NM_005583, NM_006113, NM_001775, NR_027353, NM_002116, NM_033131, NM_002308, NM_032415, NM_003821, NM_006346, NM_001136021, NM_000885, NM_009587, NM_006573, NM_001145645, NM_198517, NM_145182, NM_001768, NM_001114380, NM_013258, NM_006060, NM_006871, NM_000799, NM_001130845, NM_003126, NM_014387, NM_000247, NM_000660, NM_002698, NM_001164489, NM_0010138…	564	571	15185	1.74462	0.999639	0.0604988	0.0259035
GO:0051172~negative regulation of nitrogen compound metabolic process	74	10.9792	0.00139922	NM_002015, NM_001014434, NM_004350, NM_003540, NM_003534, NM_003533, NM_006194, NM_003531, NM_016463, NM_001136022, NM_001136021, NM_173485, NM_002501, NM_145902, NM_145901, NM_017521, NM_145903, NM_032638, NM_024015, NM_016135, NM_014634, NM_053001, NM_001166176, NM_001077261, NM_001166175, NM_130439, NM_000799, NM_000797, NM_001012614, NM_002010, NM_001008541, NM_023110, NM_172349, NM_005170, N…	564	1387	15185	1.43645	0.999719	0.0618964	0.0267191
GO:0044093~positive regulation of molecular function	89	13.2047	0.00141575	NM_001134407, NM_003834, NM_001134408, NR_024043, NM_014953, NM_014957, NM_002903, NM_006113, NM_020343, NM_033131, NM_003246, NM_002308, NM_006346, NM_021105, NM_000908, NM_009587, NM_004159, NM_001002919, NM_000610, NM_198517, NM_014634, NM_006869, NM_003745, NM_015085, NM_001175, NM_006871, NM_000799, NM_000797, NM_001995, NM_002010, NM_007254, NM_175737, NM_023110, NM_003126, NM_148919, NM_00…	564	1739	15185	1.37793	0.999745	0.062135	0.0270308
GO:0044093~positive regulation of molecular function	89	13.2047	0.00141575	NM_001134407, NM_003834, NM_001134408, NR_024043, NM_014953, NM_014957, NM_002903, NM_006113, NM_020343, NM_033131, NM_003246, NM_002308, NM_006346, NM_021105, NM_000908, NM_009587, NM_004159, NM_001002919, NM_000610, NM_198517, NM_014634, NM_006869, NM_003745, NM_015085, NM_001175, NM_006871, NM_000799, NM_000797, NM_001995, NM_002010, NM_007254, NM_175737, NM_023110, NM_003126, NM_148919, NM_00…	564	1739	15185	1.37793	0.999745	0.062135	0.0270308
GO:1903039~positive regulation of leukocyte cell-cell adhesion	18	2.67062	0.00142144	NM_002305, NR_024043, NM_003126, NM_000660, NM_002116, NM_001164489, NM_001013838, NM_002308, NM_032415, NM_005328, NM_003821, NM_000885, NM_001001390, NM_009587, NM_001001391, NM_001001392, NM_006573, NM_000610, NM_001145645, NM_145182, NM_001001389, NM_004445, NM_005018, NM_000215, NM_013258, NM_001164490, NM_000799, NM_001109	564	202	15185	2.39915	0.999754	0.0619123	0.027138
GO:0046651~lymphocyte proliferation	20	2.96736	0.00143092	NR_024043, NM_003126, NM_001130845, NM_000660, NM_006113, NM_001775, NM_002116, NM_033131, NM_001013838, NM_002308, NM_032415, NM_003821, NM_001136021, NM_009587, NM_004946, NM_006573, NM_001145645, NM_145182, NM_001706, NM_004445, NM_000215, NM_002741, NM_013258, NM_006871, NM_000799	564	238	15185	2.2625	0.999767	0.0618518	0.0273167
GO:0001501~skeletal system development	32	4.74777	0.00143315	NM_001001557, NM_002017, NM_003394, NM_004350, NM_014620, NR_003084, NM_014212, NM_000908, NM_001001390, NM_001001391, NM_001001392, NM_024015, NM_000610, NM_001142462, NM_005593, NM_002147, NM_001001389, NM_053001, NM_023111, NM_022564, NM_005967, NM_152989, NM_002010, NM_021926, NM_000138, NM_023110, NM_001031680, NM_172037, NM_000660, NM_033150, NM_001003845, NM_005328, NM_023108, NM_001167681…	564	470	15185	1.83311	0.99977	0.0614907	0.0273587
GO:0045664~regulation of neuron differentiation	35	5.19288	0.00146059	NM_002305, NM_001001557, NM_152731, NM_000609, NM_033131, NM_000582, NM_001130138, NM_016083, NM_001130137, NM_001164, NM_001136022, NM_003966, NM_005010, NM_001160259, NM_001160258, NM_004443, NM_001130136, NM_001002919, NM_032638, NM_153498, NM_014587, NM_020397, NM_003380, NM_001166176, NM_001166175, NM_023111, NM_015085, NM_000799, NR_027767, NM_002220, NM_001033886, NM_023110, NM_001130845, …	564	532	15185	1.7713	0.999804	0.0621753	0.0278756
GO:0045664~regulation of neuron differentiation	35	5.19288	0.00146059	NM_002305, NM_001001557, NM_152731, NM_000609, NM_033131, NM_000582, NM_001130138, NM_016083, NM_001130137, NM_001164, NM_001136022, NM_003966, NM_005010, NM_001160259, NM_001160258, NM_004443, NM_001130136, NM_001002919, NM_032638, NM_153498, NM_014587, NM_020397, NM_003380, NM_001166176, NM_001166175, NM_023111, NM_015085, NM_000799, NR_027767, NM_002220, NM_001033886, NM_023110, NM_001130845, …	564	532	15185	1.7713	0.999804	0.0621753	0.0278756
GO:0007159~leukocyte cell-cell adhesion	31	4.59941	0.00149704	NM_002305, NM_004310, NR_024043, NM_002209, NM_000609, NR_027353, NM_002116, NM_002308, NM_032415, NM_001033952, NM_003821, NM_000885, NM_001001390, NM_009587, NM_001001391, NM_001001392, NM_001033953, NM_006573, NM_000610, NM_001145645, NM_145182, NM_001768, NM_001001389, NM_001114380, NM_013258, NM_006871, NM_000799, NM_001033886, NM_001130845, NM_003126, NM_014387, NM_000247, NM_000660, NM_001…	564	451	15185	1.85064	0.999842	0.0632176	0.0285617
GO:0032943~mononuclear cell proliferation	20	2.96736	0.00157696	NR_024043, NM_003126, NM_001130845, NM_000660, NM_006113, NM_001775, NM_002116, NM_033131, NM_001013838, NM_002308, NM_032415, NM_003821, NM_001136021, NM_009587, NM_004946, NM_006573, NM_001145645, NM_145182, NM_001706, NM_004445, NM_000215, NM_002741, NM_013258, NM_006871, NM_000799	564	240	15185	2.24365	0.999901	0.0660044	0.0300644
GO:0048519~negative regulation of biological process	193	28.635	0.00157699	NM_003834, NM_007337, NM_001014434, NR_024043, NM_213594, NM_172365, NM_000609, NM_003540, NM_003247, NM_004350, NM_003246, NM_003534, NM_003533, NM_006194, NM_001122838, NM_147156, NM_003531, NM_002387, NM_016463, NM_001136022, NM_006346, NM_001136021, NM_173485, NM_006203, NM_001160259, NM_009587, NM_001160258, NM_017521, NM_032638, NM_000610, NM_198517, NM_016135, NM_130843, NM_130842, NM_0017…	564	4316	15185	1.20396	0.999901	0.0655365	0.0300649
GO:1903506~regulation of nucleic acid-templated transcription	152	22.5519	0.0016851	NM_001014434, NR_024043, NM_001001557, NM_213594, NM_003540, NM_004350, NM_003534, NM_003533, NM_006194, NM_003531, NM_016463, NM_001040444, NM_001136022, NM_001040443, NM_001136021, NM_003152, NM_003151, NM_173485, NM_009587, NM_006734, NM_017521, NM_032638, NM_016135, NM_014945, NM_001135649, NM_001130834, NM_053001, NM_130439, NM_006871, NM_000799, NM_001012614, NM_152989, NM_023110, NM_172349…	564	3285	15185	1.24579	0.999947	0.0693806	0.0320944
GO:0002062~chondrocyte differentiation	7	1.03858	0.00190807	NM_023110, NM_001142462, NM_001031680, NM_000660, NM_003394, NM_033150, NM_004350, NM_053001, NM_023111, NM_023108, NM_023105, NM_001844, NM_023107, NM_023106, NM_015850, NM_002010	564	36	15185	5.23518	0.992401	0.41853	0.0332118
GO:0098602~single organism cell adhesion	44	6.52819	0.00178429	NM_002305, NM_004310, NR_024043, NM_002209, NM_002116, NM_000609, NR_027353, NM_033131, NM_002308, NM_032415, NM_001033952, NM_003821, NM_007183, NM_000885, NM_001001390, NM_001001391, NM_005010, NM_009587, NM_001001392, NM_004443, NM_001033953, NM_006573, NM_000610, NM_001145645, NM_145182, NM_001768, NM_001001389, NM_001114380, NM_013258, NM_006871, NM_000799, NM_030968, NM_198594, NM_001033886…	564	729	15185	1.62503	0.999971	0.0728034	0.0339528
GO:0050790~regulation of catalytic activity	108	16.0237	0.00178632	NM_003834, NR_024043, NM_014953, NM_014957, NM_172365, NM_003246, NM_006346, NM_009587, NM_001160259, NM_001160258, NM_001013626, NM_001002919, NM_000610, NM_198517, NM_130843, NM_130842, NM_001130834, NM_006869, NM_003745, NM_005348, NM_006871, NM_000799, NM_001033677, NM_000797, NM_023110, NM_148919, NM_003126, NM_001127511, NM_002796, NM_013416, NM_001127216, NM_023108, NM_023105, NM_023107, N…	564	2206	15185	1.31812	0.999971	0.0723781	0.0339908
GO:0050790~regulation of catalytic activity	108	16.0237	0.00178632	NM_003834, NR_024043, NM_014953, NM_014957, NM_172365, NM_003246, NM_006346, NM_009587, NM_001160259, NM_001160258, NM_001013626, NM_001002919, NM_000610, NM_198517, NM_130843, NM_130842, NM_001130834, NM_006869, NM_003745, NM_005348, NM_006871, NM_000799, NM_001033677, NM_000797, NM_023110, NM_148919, NM_003126, NM_001127511, NM_002796, NM_013416, NM_001127216, NM_023108, NM_023105, NM_023107, N…	564	2206	15185	1.31812	0.999971	0.0723781	0.0339908
GO:0006355~regulation of transcription, DNA-templated	151	22.4036	0.00181923	NM_001014434, NR_024043, NM_001001557, NM_213594, NM_003540, NM_004350, NM_003534, NM_003533, NM_006194, NM_003531, NM_016463, NM_001040444, NM_001136022, NM_001040443, NM_001136021, NM_003152, NM_003151, NM_173485, NM_009587, NM_006734, NM_017521, NM_032638, NM_016135, NM_014945, NM_001135649, NM_001130834, NM_053001, NM_130439, NM_006871, NM_000799, NM_001012614, NM_152989, NM_023110, NM_172349…	564	3266	15185	1.24479	0.999976	0.0731559	0.0346066
GO:0006954~inflammatory response	26	3.85757	0.00202232	NR_024043, NM_002209, NM_153483, NM_000609, NM_001159, NM_000582, NM_002308, NM_003246, NM_147156, NM_001033952, NM_003821, NM_001136022, NM_009587, NM_002349, NM_001033953, NM_153498, NM_145182, NM_020397, NM_000953, NM_013447, NM_001114380, NM_013258, NM_001033053, NM_024736, NM_001166237, NM_001033886, NM_004755, NM_001130845, NM_014387, NM_152921, NM_000660, NM_001040058, NM_152920, NM_001164…	564	360	15185	1.94449	0.994328	0.403828	0.0351671
GO:0043085~positive regulation of catalytic activity	77	11.4243	0.00190115	NM_001134407, NM_003834, NM_001134408, NR_024043, NM_014953, NM_002903, NM_006113, NM_014957, NM_020343, NM_033131, NM_003246, NM_002308, NM_006346, NM_021105, NM_000908, NM_004159, NM_009587, NM_001002919, NM_000610, NM_198517, NM_014634, NM_006869, NM_003745, NM_015085, NM_001175, NM_006871, NM_000799, NM_000797, NM_001995, NM_002010, NM_007254, NM_175737, NM_023110, NM_003126, NM_148919, NM_00…	564	1475	15185	1.40551	0.999985	0.0758039	0.0361379
GO:0043085~positive regulation of catalytic activity	77	11.4243	0.00190115	NM_001134407, NM_003834, NM_001134408, NR_024043, NM_014953, NM_002903, NM_006113, NM_014957, NM_020343, NM_033131, NM_003246, NM_002308, NM_006346, NM_021105, NM_000908, NM_004159, NM_009587, NM_001002919, NM_000610, NM_198517, NM_014634, NM_006869, NM_003745, NM_015085, NM_001175, NM_006871, NM_000799, NM_000797, NM_001995, NM_002010, NM_007254, NM_175737, NM_023110, NM_003126, NM_148919, NM_00…	564	1475	15185	1.40551	0.999985	0.0758039	0.0361379
GO:0016310~phosphorylation	103	15.2819	0.00193638	NM_001134407, NM_002015, NM_001134408, NR_024043, NM_002488, NM_001001557, NM_000906, NM_006113, NM_002309, NM_004350, NM_033131, NM_002308, NM_003246, NM_147156, NM_006346, NM_003152, NM_004864, NM_006203, NM_009587, NM_004159, NM_001002919, NM_000610, NM_198517, NM_014634, NM_001130834, NM_001040092, NM_003745, NM_005348, NM_006871, NM_000799, NM_002220, NM_000797, NM_001012614, NM_030968, NM_0…	564	2092	15185	1.3256	0.999988	0.0766326	0.0367958
GO:0023051~regulation of signaling	136	20.178	0.00202121	NM_003834, NM_182932, NR_024043, NM_213594, NM_001001557, NM_001045557, NM_001045556, NM_000609, NM_003246, NM_147156, NM_002387, NM_016463, NM_001136022, NM_006346, NM_006203, NM_001160259, NM_009587, NM_001160258, NM_001002919, NM_032638, NM_000610, NM_198517, NM_153763, NM_003745, NM_006871, NM_000799, NM_000797, NM_001104631, NM_001033886, NM_023083, NM_023110, NM_148919, NM_023085, NM_001127…	564	2901	15185	1.2622	0.999993	0.0793194	0.038378
GO:0008284~positive regulation of cell proliferation	47	6.97329	0.00204533	NR_024043, NM_006113, NM_003394, NM_001775, NM_002116, NM_000609, NM_002309, NM_033131, NM_002308, NM_003246, NM_032415, NM_003821, NM_001136021, NM_003152, NM_003966, NM_009587, NM_006573, NM_001432, NM_001145645, NM_145182, NM_001142462, NM_014587, NM_001628, NM_015568, NM_053001, NM_013258, NM_001166176, NM_001166175, NM_023111, NM_147164, NM_000799, NM_002010, NM_001033886, NM_000209, NM_0530…	564	799	15185	1.58375	0.999994	0.0796935	0.0388274
GO:2001141~regulation of RNA biosynthetic process	152	22.5519	0.00211714	NM_001014434, NR_024043, NM_001001557, NM_213594, NM_003540, NM_004350, NM_003534, NM_003533, NM_006194, NM_003531, NM_016463, NM_001040444, NM_001136022, NM_001040443, NM_001136021, NM_003152, NM_003151, NM_173485, NM_009587, NM_006734, NM_017521, NM_032638, NM_016135, NM_014945, NM_001135649, NM_001130834, NM_053001, NM_130439, NM_006871, NM_000799, NM_001012614, NM_152989, NM_023110, NM_172349…	564	3302	15185	1.23937	0.999996	0.0818318	0.0401643
GO:0010646~regulation of cell communication	134	19.8813	0.00212268	NM_003834, NM_182932, NR_024043, NM_213594, NM_001001557, NM_001045557, NM_001045556, NM_000609, NM_003246, NM_147156, NM_002387, NM_016463, NM_001136022, NM_006346, NM_006203, NM_001160259, NM_009587, NM_001160258, NM_001002919, NM_032638, NM_000610, NM_198517, NM_153763, NM_003745, NM_006871, NM_000799, NM_000797, NM_001104631, NM_001033886, NM_023083, NM_023110, NM_148919, NM_023085, NM_001127…	564	2853	15185	1.26456	0.999996	0.0814988	0.0402674
GO:0009952~anterior/posterior pattern specification	10	1.48368	0.00232385	NM_024015, NM_006896, NM_002729, NM_004503, NM_002147, NM_183374, NM_014212, NM_014620, NM_021926, NR_003084, NM_153693	564	78	15185	3.45176	0.997379	0.417482	0.0403095
GO:0051924~regulation of calcium ion transport	17	2.52226	0.00214456	NM_018398, NM_001129829, NM_002903, NM_172364, NM_000609, NM_001129827, NM_033131, NM_001033952, NM_173584, NM_000848, NM_006203, NM_001033953, NM_020164, NM_001142368, NM_000719, NM_001164752, NM_001164753, NM_001164750, NM_001164751, NM_000799, NM_175929, NM_000797, NM_004318, NM_001104631, NM_001164756, NM_001033886, NM_001164754, NM_001164755, NM_001167623, NM_001167624, NM_000660, NM_0011298…	564	192	15185	2.38387	0.999996	0.0817679	0.0406744
GO:0051924~regulation of calcium ion transport	17	2.52226	0.00214456	NM_018398, NM_001129829, NM_002903, NM_172364, NM_000609, NM_001129827, NM_033131, NM_001033952, NM_173584, NM_000848, NM_006203, NM_001033953, NM_020164, NM_001142368, NM_000719, NM_001164752, NM_001164753, NM_001164750, NM_001164751, NM_000799, NM_175929, NM_000797, NM_004318, NM_001104631, NM_001164756, NM_001033886, NM_001164754, NM_001164755, NM_001167623, NM_001167624, NM_000660, NM_0011298…	564	192	15185	2.38387	0.999996	0.0817679	0.0406744
GO:0051251~positive regulation of lymphocyte activation	20	2.96736	0.00219026	NM_002305, NR_024043, NM_001130845, NM_003126, NM_000660, NM_006113, NM_001775, NM_002116, NM_001164489, NM_033131, NM_001013838, NM_002308, NM_032415, NM_003821, NM_001136021, NM_009587, NM_006573, NM_001145645, NM_145182, NM_001706, NM_005018, NM_004445, NM_000215, NM_013258, NM_001164490, NM_000799, NM_001109	564	247	15185	2.18006	0.999997	0.0828975	0.0415237
GO:0035556~intracellular signal transduction	119	17.6558	0.00231866	NM_003834, NR_024043, NM_001001557, NM_000609, NM_003246, NM_016463, NM_001136022, NM_006346, NM_001136021, NM_003152, NM_003151, NM_006203, NM_009587, NM_001002919, NM_000610, NM_198517, NM_003745, NM_006871, NM_000799, NM_000797, NM_001104631, NM_001033886, NM_001001579, NM_001001578, NM_001001577, NM_001001576, NM_023110, NM_001001575, NM_148919, NM_003126, NM_001001574, NM_002796, NM_00100157…	564	2493	15185	1.28517	0.999999	0.0869824	0.0439065
GO:0030890~positive regulation of B cell proliferation	7	1.03858	0.00254037	NM_006573, NM_032415, NM_001145645, NM_001130845, NM_001136021, NM_006113, NM_001775, NM_001706, NM_033131	564	38	15185	4.95964	0.998495	0.41817	0.0439862
GO:0045785~positive regulation of cell adhesion	26	3.85757	0.00234461	NM_002305, NR_024043, NM_003126, NM_000660, NM_006113, NM_002116, NM_000609, NM_001164489, NM_033131, NM_001013838, NM_002308, NM_005328, NM_032415, NM_003821, NM_199168, NM_000885, NM_001001390, NM_001001391, NM_009587, NM_001001392, NM_001004019, NM_006573, NM_000610, NM_001145645, NM_145182, NM_005803, NM_012334, NM_001001389, NM_004177, NM_014634, NM_005018, NM_004445, NM_000215, NM_013258, N…	564	364	15185	1.92313	0.999999	0.0873532	0.0443874
GO:0048812~neuron projection morphogenesis	33	4.89614	0.00250468	NM_001014434, NM_000609, NM_006237, NM_033131, NM_000582, NM_001130138, NM_001130137, NM_001164, NM_001136022, NM_003966, NM_005010, NM_004443, NM_001130136, NM_032531, NM_001130064, NM_003957, NM_002220, NM_012445, NM_001033886, NM_005277, NM_199131, NM_004755, NM_003126, NM_005627, NM_030753, NM_001040058, NM_004554, NM_002045, NM_020911, NM_004984, NM_001037132, NM_001161707, NM_020851, NM_199…	564	508	15185	1.74898	1	0.0924512	0.0473487
GO:0045596~negative regulation of cell differentiation	37	5.48961	0.00251382	NM_002305, NM_002015, NM_003495, NM_003394, NM_032495, NM_003540, NM_033131, NM_000582, NM_001033952, NM_001136022, NM_003966, NM_001033953, NM_032638, NM_001432, NM_014587, NM_003380, NM_001166176, NM_001166175, NM_015085, NM_031944, NM_000138, NM_053056, NM_199131, NM_001130845, NM_005170, NM_001100398, NM_001178, NM_001422, NM_001145459, NM_000660, NM_001031807, NM_030753, NM_001040058, NM_015…	564	592	15185	1.68273	1	0.0921914	0.0475175
GO:0031346~positive regulation of cell projection organization	22	3.26409	0.00252539	NM_005277, NM_023110, NM_001130863, NM_001127511, NM_006640, NM_030753, NM_000609, NM_033131, NM_001013838, NM_001130138, NM_001130137, NM_016083, NM_001017963, NM_023108, NM_001164, NM_207413, NM_020851, NM_199168, NM_023105, NM_003966, NM_023107, NM_001127510, NM_023106, NM_001160259, NM_001160258, NM_001130136, NM_001002919, NM_145689, NM_153498, NM_020397, NM_006209, NM_001040092, NM_022772, …	564	288	15185	2.05668	1	0.0920196	0.0477312
GO:0030890~positive regulation of B cell proliferation	7	1.03858	0.00254037	NM_006573, NM_032415, NM_001145645, NM_001130845, NM_001136021, NM_006113, NM_001775, NM_001706, NM_033131	564	38	15185	4.95964	1	0.0919677	0.0480078
GO:0045444~fat cell differentiation	17	2.52226	0.00264079	NM_002015, NM_053056, NM_001328, NM_001001557, NM_148919, NM_001178, NM_000660, NM_003394, NM_033131, NM_004159, NM_022114, NM_032638, NM_001165960, NM_014587, NM_001145661, NM_001145662, NM_003745, NM_001030273, NM_001030272, NM_199454, NM_007191, NM_021628, NM_012082, NM_001012614, NM_003221	564	196	15185	2.33522	1	0.0948429	0.0498598
GO:0042472~inner ear morphogenesis	8	1.18694	0.00291779	NM_032638, NM_023110, NM_005519, NM_001145661, NM_001145662, NM_033150, NM_005221, NM_033131, NM_023111, NM_023108, NM_006902, NM_023105, NM_001844, NM_023107, NM_023106, NM_015850, NM_002010, NM_022716	564	52	15185	4.14212	0.999428	0.41332	0.0503632
GO:0034765~regulation of ion transmembrane transport	26	3.85757	0.00271069	NM_018398, NM_001129829, NM_172364, NM_001129827, NM_033131, NM_003246, NM_053277, NM_001039574, NM_001164605, NM_003636, NM_000848, NM_006203, NM_001135111, NR_028406, NM_020164, NM_153763, NM_001142368, NM_000719, NM_001164752, NM_144779, NM_001164753, NM_001164750, NM_001164751, NM_014164, NM_004978, NM_000083, NM_000799, NM_175929, NM_001040107, NM_000797, NM_004318, NM_001104631, NM_00116475…	564	368	15185	1.90222	1	0.0966382	0.0511469
GO:0010975~regulation of neuron projection development	27	4.00593	0.00281571	NM_002305, NM_000609, NM_033131, NM_000582, NM_001130138, NM_001130137, NM_016083, NM_001164, NM_001136022, NM_003966, NM_005010, NM_001160259, NM_001160258, NM_004443, NM_001130136, NM_001002919, NM_153498, NM_020397, NM_003380, NM_023111, NM_015085, NM_000799, NR_027767, NM_002220, NM_001033886, NM_023110, NM_001161563, NM_001161562, NM_001100398, NM_001161561, NM_015028, NM_001161560, NM_00116…	564	389	15185	1.86874	1	0.0995882	0.0530778
GO:0010975~regulation of neuron projection development	27	4.00593	0.00281571	NM_002305, NM_000609, NM_033131, NM_000582, NM_001130138, NM_001130137, NM_016083, NM_001164, NM_001136022, NM_003966, NM_005010, NM_001160259, NM_001160258, NM_004443, NM_001130136, NM_001002919, NM_153498, NM_020397, NM_003380, NM_023111, NM_015085, NM_000799, NR_027767, NM_002220, NM_001033886, NM_023110, NM_001161563, NM_001161562, NM_001100398, NM_001161561, NM_015028, NM_001161560, NM_00116…	564	389	15185	1.86874	1	0.0995882	0.0530778
GO:0035136~forelimb morphogenesis	7	1.03858	0.00290991	NM_001129829, NM_001167623, NM_001167624, NM_172037, NM_001129843, NM_030753, NM_001129844, NM_001167625, NM_001129827, NM_001129846, NM_001129840, NM_001129842, NM_001129841, NM_001142462, NM_001129834, NM_001129835, NM_001129832, NM_001129833, NM_199460, NM_001129838, NM_053001, NM_006492, NM_001129839, NM_001129836, NM_000719, NM_001129837, NM_001129831, NM_001129830, NM_021926, NM_003221	564	39	15185	4.83247	1	0.102131	0.0548065
GO:0046903~secretion	57	8.45697	0.00299206	NR_024043, NM_000906, NM_000609, NM_002309, NM_003246, NM_002308, NM_016083, NM_001142445, NM_001164, NM_003152, NM_024418, NM_000908, NM_009587, NM_001160259, NM_001160258, NM_001142446, NM_002847, NM_032638, NM_000817, NM_001145645, NM_000818, NM_130843, NM_130842, NM_153763, NM_003745, NM_000719, NM_001077261, NM_207322, NM_004978, NM_024736, NM_000797, NM_030968, NM_198594, NM_001033886, NM_0…	564	1039	15185	1.47705	1	0.104238	0.0563115
GO:0046903~secretion	57	8.45697	0.00299206	NR_024043, NM_000906, NM_000609, NM_002309, NM_003246, NM_002308, NM_016083, NM_001142445, NM_001164, NM_003152, NM_024418, NM_000908, NM_009587, NM_001160259, NM_001160258, NM_001142446, NM_002847, NM_032638, NM_000817, NM_001145645, NM_000818, NM_130843, NM_130842, NM_153763, NM_003745, NM_000719, NM_001077261, NM_207322, NM_004978, NM_024736, NM_000797, NM_030968, NM_198594, NM_001033886, NM_0…	564	1039	15185	1.47705	1	0.104238	0.0563115
GO:0043087~regulation of GTPase activity	39	5.78635	0.00300529	NM_001134407, NM_003834, NM_001134408, NM_004310, NM_014953, NM_012292, NM_183337, NM_014957, NM_006113, NM_020343, NM_001098670, NM_004443, NM_002847, NM_001432, NM_145182, NM_198517, NM_130843, NM_130842, NM_006869, NM_022772, NM_013258, NM_023111, NM_015085, NM_001175, NM_002010, NM_024832, NM_175737, NM_023110, NM_001130845, NM_003126, NM_001100398, NM_014387, NM_024898, NM_002924, NM_023108,…	564	641	15185	1.63811	1	0.104056	0.0565538
GO:0002684~positive regulation of immune system process	48	7.12166	0.00302457	NM_002305, NR_024043, NM_017806, NM_006113, NM_001775, NM_002116, NM_000609, NM_002309, NM_033131, NM_002308, NM_003246, NM_016083, NM_032415, NM_001033952, NM_003821, NM_021105, NM_001136021, NM_000885, NM_006203, NM_001160259, NM_009587, NM_004159, NM_001160258, NM_001033953, NM_006573, NM_032638, NM_153498, NM_001432, NM_001145645, NM_005720, NM_145182, NM_020397, NM_005348, NM_013258, NM_0032…	564	838	15185	1.54217	1	0.104073	0.0569064
GO:0002684~positive regulation of immune system process	48	7.12166	0.00302457	NM_002305, NR_024043, NM_017806, NM_006113, NM_001775, NM_002116, NM_000609, NM_002309, NM_033131, NM_002308, NM_003246, NM_016083, NM_032415, NM_001033952, NM_003821, NM_021105, NM_001136021, NM_000885, NM_006203, NM_001160259, NM_009587, NM_004159, NM_001160258, NM_001033953, NM_006573, NM_032638, NM_153498, NM_001432, NM_001145645, NM_005720, NM_145182, NM_020397, NM_005348, NM_013258, NM_0032…	564	838	15185	1.54217	1	0.104073	0.0569064
GO:0035107~appendage morphogenesis	14	2.07715	0.0030643	NM_023110, NM_001129829, NM_001167623, NM_001167624, NM_172037, NM_000545, NM_001129843, NM_030753, NM_001129844, NM_033150, NM_001167625, NM_001129827, NM_001129846, NM_001129840, NM_023108, NM_001129842, NM_001129841, NM_023105, NM_014212, NM_001844, NM_023107, NM_023106, NM_001142462, NM_001129834, NM_001129835, NM_001129832, NM_005221, NM_001129833, NM_199460, NM_001129838, NM_053001, NM_0064…	564	146	15185	2.58173	1	0.104752	0.0576332
GO:0035108~limb morphogenesis	14	2.07715	0.0030643	NM_023110, NM_001129829, NM_001167623, NM_001167624, NM_172037, NM_000545, NM_001129843, NM_030753, NM_001129844, NM_033150, NM_001167625, NM_001129827, NM_001129846, NM_001129840, NM_023108, NM_001129842, NM_001129841, NM_023105, NM_014212, NM_001844, NM_023107, NM_023106, NM_001142462, NM_001129834, NM_001129835, NM_001129832, NM_005221, NM_001129833, NM_199460, NM_001129838, NM_053001, NM_0064…	564	146	15185	2.58173	1	0.104752	0.0576332

## Sheet: AA-DMP protein domains
Term	Count	%	PValue	Genes	List Total	Pop Hits	Pop Total	Fold Enrichment	Bonferroni	Benjamini	FDR
IPR013164:Cadherin, N-terminal	25	1.37363	1.74e-09	NM_031411, NM_018920, NM_018923, NM_018922, NM_003736, NM_018924, NM_002587, NM_018905, NM_018900, NM_002590, NM_016580, NM_018908, NM_018909, NM_018906, NM_018907, NM_032949, NM_018939, NM_032420, NM_032098, NM_018934, NM_031856, NM_001040429, NM_031849, NM_018915, NM_018916, NM_018910, NM_018911, NM_018912, NM_018917, NM_018918, NM_018919	1630	62	16365	4.04834	3.96e-06	3.96e-06	3.04e-08
IPR013098:Immunoglobulin I-set	34	1.86813	9.79e-07	NM_003970, NM_001005389, NM_152447, NM_175613, NM_133432, NM_002844, NM_016081, NM_133378, NM_133437, NM_001005388, NM_001144058, NM_020778, NM_015090, NM_144651, NM_001144059, NM_002020, NM_001135648, NM_032531, NM_152744, NM_175607, NM_133369, NM_023111, NM_080872, NM_002850, NM_013962, NM_001144952, NM_001024660, NM_130854, NM_130853, NM_023110, NM_130855, NM_005529, NM_020703, NM_005076, NM_0…	1630	136	16365	2.50997	0.00222016	0.0011107	1.71e-05
IPR002126:Cadherin	30	1.64835	1.9e-06	NM_031411, NM_018920, NM_018923, NM_018922, NM_033646, NM_018924, NM_003736, NM_002587, NM_018905, NM_018900, NM_002590, NM_016580, NM_014718, NM_018908, NM_018909, NM_018906, NM_018907, NM_032949, NM_018939, NM_032420, NM_032098, NM_018934, NM_031891, NM_031856, NM_001040429, NM_004361, NM_031849, NM_018915, NM_018916, NM_018910, NM_018911, NM_018912, NM_004933, NM_018917, NM_018918, NM_022124, …	1630	115	16365	2.6191	0.00430098	0.00143572	3.31e-05
IPR020894:Cadherin conserved site	29	1.59341	2.33e-06	NM_031411, NM_018920, NM_018923, NM_018922, NM_033646, NM_018924, NM_003736, NM_002587, NM_018905, NM_018900, NM_002590, NM_016580, NM_018908, NM_018909, NM_018906, NM_018907, NM_032949, NM_018939, NM_032420, NM_032098, NM_018934, NM_031891, NM_031856, NM_001040429, NM_004361, NM_031849, NM_018915, NM_018916, NM_018910, NM_018911, NM_018912, NM_004933, NM_018917, NM_018918, NM_022124, NM_018919	1630	110	16365	2.64688	0.00527022	0.00132017	4.06e-05
IPR015919:Cadherin-like	30	1.64835	2.76e-06	NM_031411, NM_018920, NM_018923, NM_018922, NM_033646, NM_018924, NM_003736, NM_002587, NM_018905, NM_018900, NM_002590, NM_016580, NM_014718, NM_018908, NM_018909, NM_018906, NM_018907, NM_032949, NM_018939, NM_032420, NM_032098, NM_018934, NM_031891, NM_031856, NM_001040429, NM_004361, NM_031849, NM_018915, NM_018916, NM_018910, NM_018911, NM_018912, NM_004933, NM_018917, NM_018918, NM_022124, …	1630	117	16365	2.57433	0.00625434	0.00125401	4.82e-05
IPR020479:Homeodomain, metazoa	21	1.15385	0.000387	NM_002653, NM_000209, NM_001426, NM_153631, NM_153632, NM_153633, NM_014620, NR_003084, NM_153715, NM_005523, NM_006898, NM_004387, NM_002729, NM_019102, NM_014213, NM_002449, NM_153693, NM_024017, NM_030661, NM_001079668, NM_005222, NM_005221, NM_001080458, NM_001166176, NM_001166175, NM_005521, NM_004503, NM_003317	1630	89	16365	2.36896	0.584435	0.117896	0.00672393
IPR017970:Homeobox, conserved site	33	1.81319	0.000416	NM_002653, NM_000209, NM_001014434, NM_001426, NM_005568, NM_153631, NM_001127612, NM_006562, NM_153632, NM_153633, NM_002698, NM_002586, NM_014620, NR_003084, NM_153715, NM_005523, NM_006898, NM_173849, NM_004387, NM_002729, NM_019102, NM_024721, NM_014213, NM_006361, NM_033267, NM_002449, NM_153693, NM_001135254, NM_001134222, NM_024336, NM_024017, NM_030661, NM_001079668, NM_005222, NM_005221,…	1630	173	16365	1.91512	0.611005	0.111325	0.00722803
IPR001356:Homeodomain	38	2.08791	0.000724	NM_001014434, NM_153631, NM_153632, NM_153633, NM_014620, NM_002586, NR_003084, NM_173849, NM_024721, NM_014213, NM_033267, NM_002449, NM_001135254, NM_001134222, NM_024017, NM_001166176, NM_203463, NM_001166175, NM_153216, NM_007252, NM_002653, NM_000209, NM_001426, NM_005568, NM_001127612, NM_006562, NM_002698, NM_153715, NM_005523, NM_006898, NM_004387, NM_002729, NM_019102, NM_006361, NM_1536…	1630	216	16365	1.76627	0.806744	0.16693	0.0125496
IPR003598:Immunoglobulin subtype 2	39	2.14286	0.00105122	NM_003970, NM_153487, NM_001005389, NM_152447, NM_175613, NM_133432, NM_016081, NM_133378, NM_133437, NM_031281, NM_001005388, NM_001144058, NM_020778, NM_015090, NM_144651, NM_001144059, NM_002020, NM_001101372, NM_032531, NM_152744, NM_175607, NM_023111, NM_002850, NM_080872, NM_013962, NM_001144952, NM_001816, NM_001024660, NM_130854, NM_130853, NM_130855, NM_023110, NM_005529, NM_005076, NM_0…	1630	228	16365	1.71735	0.908239	0.212473	0.0181842
IPR011009:Protein kinase-like domain	73	4.01099	0.00116531	NM_001259, NM_001006943, NM_001143976, NM_133432, NM_002401, NM_001077401, NM_133437, NM_033126, NM_199289, NM_002020, NM_001134419, NM_013302, NM_001006932, NM_001004023, NM_001010938, NM_020526, NM_173500, NM_004672, NM_005204, NM_198393, NM_182691, NM_182692, NM_024876, NM_181690, NM_001024660, NM_033116, NM_005921, NM_001142555, NM_001164664, NM_023110, NM_203351, NM_178510, NM_015183, NM_001…	1630	506	16365	1.44844	0.929204	0.213941	0.0201389
IPR013783:Immunoglobulin-like fold	86	4.72527	0.00157032	NM_002303, NM_174934, NM_001006943, NM_002119, NM_002117, NM_138939, NM_152447, NM_175613, NM_138379, NM_002845, NM_133432, NM_002844, NM_016081, NM_031281, NM_133437, NM_015986, NM_015090, NM_138940, NM_002848, NM_144651, NM_002020, NM_001101372, NM_005535, NM_138806, NM_001135648, NM_032531, NM_173164, NM_173165, NM_020526, NM_001130067, NM_173163, NM_175607, NM_015215, NM_006120, NM_178232, NM…	1630	623	16365	1.38592	0.971816	0.240077	0.0270484
IPR017441:Protein kinase, ATP binding site	54	2.96703	0.00252442	NM_001259, NM_002350, NM_014916, NM_003390, NM_001136554, NM_001006943, NM_012290, NM_001145306, NM_212535, NM_020639, NM_001143976, NM_001077401, NM_003582, NM_080823, NM_172115, NM_033126, NM_172114, NM_005109, NM_004304, NM_199289, NM_004441, NM_001005862, NM_002020, NM_153498, NM_001134419, NM_001006932, NM_020397, NM_001081560, NM_001004023, NM_001010938, NM_020526, NM_001081562, NM_00108156…	1630	361	16365	1.50181	0.996786	0.33636	0.0431441
IPR000719:Protein kinase, catalytic domain	66	3.62637	0.0027514	NM_001259, NM_001006943, NM_001143976, NM_133432, NM_002401, NM_001077401, NM_133437, NM_033126, NM_199289, NM_002020, NM_001134419, NM_001006932, NM_001004023, NM_001010938, NM_020526, NM_173500, NM_004672, NM_005204, NM_198393, NM_182691, NM_182692, NM_181690, NM_001024660, NM_033116, NM_005921, NM_001164664, NM_023110, NM_203351, NM_178510, NM_015183, NM_001166691, NM_005781, NM_001134420, NM_…	1630	463	16365	1.43117	0.998083	0.341068	0.0469361

## Sheet: AA-DVP protein domains
Term	Count	%	PValue	Genes	List Total	Pop Hits	Pop Total	Fold Enrichment	Bonferroni	Benjamini	FDR
IPR001356:Homeodomain	34	5.04451	3.41e-12	NM_022062, NM_000209, NM_001014434, NM_199131, NM_001136271, NM_000545, NM_001145459, NM_002698, NM_032495, NM_014620, NM_006237, NR_003084, NM_001989, NM_004387, NM_139211, NM_002729, NM_139212, NM_152568, NM_001009812, NM_173485, NM_014212, NM_153693, NM_024015, NM_199160, NM_005519, NM_002147, NM_005221, NM_006492, NM_001166176, NM_019558, NM_001166175, NM_006896, NM_138281, NM_004503, NM_0069…	603	216	16365	4.27193	3.68e-09	3.68e-09	5.44e-11
IPR017970:Homeobox, conserved site	28	4.1543	1.97e-10	NM_000209, NM_001014434, NM_001136271, NM_199131, NM_002698, NM_014620, NM_006237, NR_003084, NM_001989, NM_004387, NM_002729, NM_152568, NM_014212, NM_153693, NM_024015, NM_199160, NM_005519, NM_002147, NM_005221, NM_006492, NM_001166176, NM_019558, NM_001166175, NM_006896, NM_138281, NM_004503, NM_006902, NM_031944, NM_173576, NM_014368, NM_021926, NM_004789, NM_022716	603	173	16365	4.39249	2.13e-07	1.06e-07	3.15e-09
IPR009057:Homeodomain-like	36	5.34125	6.34e-10	NM_022062, NM_000209, NM_001014434, NM_199131, NM_001136271, NM_000545, NM_001145459, NM_002698, NM_032495, NM_014620, NM_006237, NR_003084, NM_004387, NM_001989, NM_006194, NM_139211, NM_002729, NM_139212, NM_152568, NM_001009812, NM_173485, NM_014212, NM_153693, NM_024015, NM_199160, NM_005519, NM_002147, NM_005221, NM_006492, NM_001166176, NM_019558, NM_001077261, NM_001166175, NM_006312, NM_0…	603	290	16365	3.36902	6.84e-07	2.28e-07	1.01e-08
IPR020479:Homeodomain, metazoa	17	2.52226	1.34e-07	NM_024015, NM_000209, NM_001136271, NM_005519, NM_002147, NM_005221, NM_014620, NR_003084, NM_001166176, NM_019558, NM_001166175, NM_004387, NM_001989, NM_006896, NM_002729, NM_138281, NM_152568, NM_004503, NM_014212, NM_153693	603	89	16365	5.18391	0.000144918	3.62e-05	2.14e-06
IPR020479:Homeodomain, metazoa	17	2.52226	1.34e-07	NM_024015, NM_000209, NM_001136271, NM_005519, NM_002147, NM_005221, NM_014620, NR_003084, NM_001166176, NM_019558, NM_001166175, NM_004387, NM_001989, NM_006896, NM_002729, NM_138281, NM_152568, NM_004503, NM_014212, NM_153693	603	89	16365	5.18391	0.000144918	3.62e-05	2.14e-06
IPR013164:Cadherin, N-terminal	13	1.92878	2.21e-06	NM_032088, NM_032099, NM_018920, NM_018923, NM_018922, NM_018925, NM_018924, NM_003736, NM_018915, NM_018916, NM_018912, NM_018917, NM_018918, NM_018919	603	62	16365	5.6905	0.00237737	0.000475927	3.52e-05
IPR020894:Cadherin conserved site	16	2.37389	1.19e-05	NM_032088, NM_001161586, NM_032099, NM_018920, NM_018923, NM_018922, NM_018925, NM_003736, NM_018924, NM_018915, NM_018916, NM_001014811, NM_001943, NM_018912, NM_018917, NM_006680, NM_022124, NM_018918, NM_018919	603	110	16365	3.94754	0.0127586	0.00213782	0.000189983
IPR002126:Cadherin	16	2.37389	2.05e-05	NM_032088, NM_001161586, NM_032099, NM_018920, NM_018923, NM_018922, NM_018925, NM_003736, NM_018924, NM_018915, NM_018916, NM_001014811, NM_001943, NM_018912, NM_018917, NM_006680, NM_022124, NM_018918, NM_018919	603	115	16365	3.7759	0.0218561	0.00315195	0.000326933
IPR015919:Cadherin-like	16	2.37389	2.52e-05	NM_032088, NM_001161586, NM_032099, NM_018920, NM_018923, NM_018922, NM_018925, NM_003736, NM_018924, NM_018915, NM_018916, NM_001014811, NM_001943, NM_018912, NM_018917, NM_006680, NM_022124, NM_018918, NM_018919	603	117	16365	3.71136	0.0268404	0.00339512	0.000402497
IPR017995:Homeobox protein, antennapedia type	6	0.890208	4.23e-05	NM_024015, NM_000209, NM_006896, NM_002147, NM_014620, NR_003084	603	12	16365	13.5697	0.0445946	0.00505602	0.000674795
IPR001827:Homeobox protein, antennapedia type, conserved site	7	1.03858	6.02e-05	NM_024015, NM_019558, NM_006896, NM_004503, NM_002147, NM_014620, NR_003084, NM_153693	603	20	16365	9.49876	0.0628822	0.00647358	0.000960534
