# Supplementary material for: Cell-Free DNA Modification Dynamics in Abiraterone Acetate-Treated Prostate Cancer Patients
Source: Oxford University Press journal article supplement (doi:10.1158/1078-0432.ccr-18-0101), 2018-04-03
Supplement: 10780432ccr180101-sup-195306_2_supp_4641501_p5xh38.xlsx [file 10780432ccr180101-sup-195306_2_supp_4641501_p5xh38.xlsx]

## Sheet: Sheet1
Supplementary Table 5. List of significant AA-DVPs.
IlmnID	VarLogFC.V1vsBL_Sensitive	TTestP.V1vsBL_Sensitive	BartlettP.V1vsBL_Sensitive	VarLogFC.V1vsBL_Resistant	TTestP.V1vsBL_Resistant	BartlettP.V1vsBL_Resistant	VarLogFC.V2vsBL_Sensitive	TTestP.V2vsBL_Sensitive	BartlettP.V2vsBL_Sensitive	VarLogFC.V2vsBL_Resistant	TTestP.V2vsBL_Resistant	BartlettP.V2vsBL_Resistant	VarLogFC.V3.V4vsBL_Sensitive	TTestP.V3.V4vsBL_Sensitive	BartlettP.V3.V4vsBL_Sensitive	VarLogFC.V3.V4vsBL_Resistant	TTestP.V3.V4vsBL_Resistant	BartlettP.V3.V4vsBL_Resistant	VarLogFC.EoTvsBL_Resistant	TTestP.EoTvsBL_Resistant	BartlettP.EoTvsBL_Resistant	VarLogFC.AcrossGroupAt_BL	TTestP.AcrossGroupAt_BL	BartlettP.AcrossGroupAt_BL	VarLogFC.AcrossGroupAt_V1	TTestP.AcrossGroupAt_V1	BartlettP.AcrossGroupAt_V1	VarLogFC.AcrossGroupAt_V2	TTestP.AcrossGroupAt_V2	BartlettP.AcrossGroupAt_V2	VarLogFC.AcrossGroupAt_V3_V4	TTestP.AcrossGroupAt_V3_V4	BartlettP.AcrossGroupAt_V3_V4
cg00004067	NA	NA	NA	NA	NA	NA	NA	NA	NA	NA	NA	NA	NA	NA	NA	NA	NA	NA	NA	NA	NA	NA	NA	NA	4.24918	0.0128261	8.72756e-05	NA	NA	NA	NA	NA	NA
cg00036664	NA	NA	NA	NA	NA	NA	NA	NA	NA	NA	NA	NA	NA	NA	NA	NA	NA	NA	NA	NA	NA	NA	NA	NA	4.12841	0.0451306	0.000123896	NA	NA	NA	NA	NA	NA
cg00061811	NA	NA	NA	NA	NA	NA	6.07187	0.0434024	1.16928e-05	NA	NA	NA	NA	NA	NA	NA	NA	NA	NA	NA	NA	NA	NA	NA	NA	NA	NA	NA	NA	NA	NA	NA	NA
cg00063246	NA	NA	NA	NA	NA	NA	NA	NA	NA	NA	NA	NA	NA	NA	NA	NA	NA	NA	NA	NA	NA	NA	NA	NA	4.36874	0.0179509	6.15929e-05	NA	NA	NA	NA	NA	NA
cg00082235	4.76122	0.0263637	3.86555e-05	NA	NA	NA	NA	NA	NA	NA	NA	NA	NA	NA	NA	NA	NA	NA	NA	NA	NA	NA	NA	NA	4.27418	0.00336219	8.11525e-05	NA	NA	NA	NA	NA	NA
cg00092551	4.62501	0.0121958	5.72586e-05	NA	NA	NA	NA	NA	NA	NA	NA	NA	NA	NA	NA	NA	NA	NA	NA	NA	NA	NA	NA	NA	NA	NA	NA	NA	NA	NA	NA	NA	NA
cg00099393	NA	NA	NA	NA	NA	NA	NA	NA	NA	NA	NA	NA	NA	NA	NA	NA	NA	NA	NA	NA	NA	NA	NA	NA	3.7727	0.0144577	0.000343726	NA	NA	NA	NA	NA	NA
cg00107916	NA	NA	NA	NA	NA	NA	NA	NA	NA	NA	NA	NA	NA	NA	NA	NA	NA	NA	NA	NA	NA	NA	NA	NA	4.47719	0.0125667	4.48371e-05	NA	NA	NA	NA	NA	NA
cg00121634	5.0918	0.0452775	1.47829e-05	NA	NA	NA	NA	NA	NA	NA	NA	NA	NA	NA	NA	NA	NA	NA	NA	NA	NA	NA	NA	NA	4.74774	0.00367022	2.02083e-05	NA	NA	NA	NA	NA	NA
cg00146951	NA	NA	NA	NA	NA	NA	NA	NA	NA	NA	NA	NA	NA	NA	NA	NA	NA	NA	NA	NA	NA	NA	NA	NA	3.77418	0.0388977	0.000342285	NA	NA	NA	NA	NA	NA
cg00150520	5.22328	0.039564	1.00597e-05	NA	NA	NA	NA	NA	NA	NA	NA	NA	NA	NA	NA	NA	NA	NA	NA	NA	NA	NA	NA	NA	5.23252	0.0270992	4.77787e-06	NA	NA	NA	NA	NA	NA
cg00164949	NA	NA	NA	NA	NA	NA	NA	NA	NA	NA	NA	NA	NA	NA	NA	NA	NA	NA	NA	NA	NA	NA	NA	NA	4.07718	0.021161	0.000143667	NA	NA	NA	NA	NA	NA
cg00220455	4.28645	0.0181363	0.000150565	NA	NA	NA	NA	NA	NA	NA	NA	NA	NA	NA	NA	NA	NA	NA	NA	NA	NA	NA	NA	NA	NA	NA	NA	NA	NA	NA	NA	NA	NA
cg00260634	NA	NA	NA	NA	NA	NA	NA	NA	NA	NA	NA	NA	NA	NA	NA	NA	NA	NA	NA	NA	NA	NA	NA	NA	3.57861	0.00560089	0.000594756	NA	NA	NA	NA	NA	NA
cg00264441	NA	NA	NA	NA	NA	NA	NA	NA	NA	NA	NA	NA	NA	NA	NA	NA	NA	NA	NA	NA	NA	NA	NA	NA	4.33473	0.0262572	6.80226e-05	NA	NA	NA	NA	NA	NA
cg00265360	4.317	0.0454347	0.000138075	NA	NA	NA	NA	NA	NA	NA	NA	NA	NA	NA	NA	NA	NA	NA	NA	NA	NA	NA	NA	NA	NA	NA	NA	NA	NA	NA	NA	NA	NA
cg00267596	4.88851	0.0205949	2.67302e-05	NA	NA	NA	NA	NA	NA	NA	NA	NA	NA	NA	NA	NA	NA	NA	NA	NA	NA	NA	NA	NA	NA	NA	NA	NA	NA	NA	NA	NA	NA
cg00297282	NA	NA	NA	NA	NA	NA	NA	NA	NA	NA	NA	NA	NA	NA	NA	NA	NA	NA	NA	NA	NA	NA	NA	NA	3.5931	0.0477069	0.000571029	NA	NA	NA	NA	NA	NA
cg00323861	NA	NA	NA	NA	NA	NA	NA	NA	NA	NA	NA	NA	NA	NA	NA	NA	NA	NA	NA	NA	NA	NA	NA	NA	4.07823	0.00874253	0.000143232	NA	NA	NA	NA	NA	NA
cg00338391	NA	NA	NA	NA	NA	NA	NA	NA	NA	NA	NA	NA	NA	NA	NA	NA	NA	NA	NA	NA	NA	NA	NA	NA	4.35165	0.025113	6.47443e-05	NA	NA	NA	NA	NA	NA
cg00347938	NA	NA	NA	NA	NA	NA	NA	NA	NA	NA	NA	NA	NA	NA	NA	NA	NA	NA	NA	NA	NA	NA	NA	NA	3.72851	0.0120957	0.000389654	NA	NA	NA	NA	NA	NA
cg00393798	NA	NA	NA	NA	NA	NA	NA	NA	NA	NA	NA	NA	NA	NA	NA	NA	NA	NA	NA	NA	NA	NA	NA	NA	3.86647	0.0319574	0.00026314	NA	NA	NA	NA	NA	NA
cg00400221	NA	NA	NA	NA	NA	NA	NA	NA	NA	NA	NA	NA	NA	NA	NA	NA	NA	NA	NA	NA	NA	NA	NA	NA	3.56978	0.0390081	0.000609679	NA	NA	NA	NA	NA	NA
cg00408906	NA	NA	NA	NA	NA	NA	NA	NA	NA	NA	NA	NA	9.66262	0.0298371	4.929e-07	NA	NA	NA	NA	NA	NA	NA	NA	NA	NA	NA	NA	NA	NA	NA	-8.91872	0.0194374	1.41331e-06
cg00417304	-4.80368	0.0423602	3.41863e-05	NA	NA	NA	NA	NA	NA	NA	NA	NA	NA	NA	NA	NA	NA	NA	NA	NA	NA	NA	NA	NA	NA	NA	NA	NA	NA	NA	NA	NA	NA
cg00459623	NA	NA	NA	NA	NA	NA	NA	NA	NA	NA	NA	NA	NA	NA	NA	NA	NA	NA	NA	NA	NA	NA	NA	NA	3.93387	0.0121691	0.000216983	NA	NA	NA	NA	NA	NA
cg00501467	NA	NA	NA	NA	NA	NA	NA	NA	NA	NA	NA	NA	NA	NA	NA	NA	NA	NA	NA	NA	NA	NA	NA	NA	3.71889	0.00893031	0.000400421	NA	NA	NA	NA	NA	NA
cg00527440	NA	NA	NA	NA	NA	NA	NA	NA	NA	NA	NA	NA	NA	NA	NA	NA	NA	NA	NA	NA	NA	NA	NA	NA	3.75113	0.0244364	0.000365443	NA	NA	NA	NA	NA	NA
cg00544436	NA	NA	NA	NA	NA	NA	NA	NA	NA	NA	NA	NA	NA	NA	NA	NA	NA	NA	NA	NA	NA	NA	NA	NA	4.10101	0.0270915	0.000134111	NA	NA	NA	NA	NA	NA
cg00562871	NA	NA	NA	NA	NA	NA	NA	NA	NA	NA	NA	NA	NA	NA	NA	NA	NA	NA	NA	NA	NA	NA	NA	NA	4.06758	0.0430202	0.000147704	NA	NA	NA	NA	NA	NA
cg00577935	4.4702	0.0183924	8.92566e-05	NA	NA	NA	NA	NA	NA	NA	NA	NA	NA	NA	NA	NA	NA	NA	NA	NA	NA	NA	NA	NA	3.87489	0.0480329	0.000256889	NA	NA	NA	NA	NA	NA
cg00601648	NA	NA	NA	NA	NA	NA	NA	NA	NA	NA	NA	NA	NA	NA	NA	NA	NA	NA	NA	NA	NA	NA	NA	NA	4.75222	0.0206808	1.99421e-05	NA	NA	NA	NA	NA	NA
cg00610310	4.58546	0.0459516	6.41528e-05	NA	NA	NA	NA	NA	NA	NA	NA	NA	NA	NA	NA	NA	NA	NA	NA	NA	NA	NA	NA	NA	NA	NA	NA	NA	NA	NA	NA	NA	NA
cg00703061	NA	NA	NA	NA	NA	NA	NA	NA	NA	NA	NA	NA	NA	NA	NA	NA	NA	NA	NA	NA	NA	NA	NA	NA	3.74554	0.00319055	0.000371288	NA	NA	NA	NA	NA	NA
cg00794508	NA	NA	NA	NA	NA	NA	NA	NA	NA	NA	NA	NA	NA	NA	NA	NA	NA	NA	NA	NA	NA	NA	NA	NA	NA	NA	NA	6.45835	0.0209614	4.75122e-06	NA	NA	NA
cg00804392	NA	NA	NA	NA	NA	NA	NA	NA	NA	NA	NA	NA	NA	NA	NA	NA	NA	NA	NA	NA	NA	NA	NA	NA	3.81669	0.023474	0.000303291	NA	NA	NA	NA	NA	NA
cg00807586	4.74149	0.0326876	4.09241e-05	NA	NA	NA	NA	NA	NA	NA	NA	NA	NA	NA	NA	NA	NA	NA	NA	NA	NA	NA	NA	NA	4.56401	0.012021	3.47448e-05	NA	NA	NA	NA	NA	NA
cg00811132	NA	NA	NA	NA	NA	NA	NA	NA	NA	NA	NA	NA	NA	NA	NA	NA	NA	NA	NA	NA	NA	NA	NA	NA	3.63203	0.0457547	0.00051178	NA	NA	NA	NA	NA	NA
cg00830285	4.55413	0.0291052	7.01888e-05	NA	NA	NA	NA	NA	NA	NA	NA	NA	NA	NA	NA	NA	NA	NA	NA	NA	NA	NA	NA	NA	4.54198	0.0379984	3.70699e-05	NA	NA	NA	NA	NA	NA
cg00850971	NA	NA	NA	NA	NA	NA	NA	NA	NA	NA	NA	NA	NA	NA	NA	NA	NA	NA	NA	NA	NA	NA	NA	NA	4.05907	0.0399761	0.000151374	NA	NA	NA	NA	NA	NA
cg00854166	NA	NA	NA	NA	NA	NA	NA	NA	NA	NA	NA	NA	NA	NA	NA	NA	NA	NA	NA	NA	NA	NA	NA	NA	3.74794	0.0458382	0.000368768	NA	NA	NA	NA	NA	NA
cg00856041	4.7528	0.0301347	3.96085e-05	NA	NA	NA	NA	NA	NA	NA	NA	NA	NA	NA	NA	NA	NA	NA	NA	NA	NA	NA	NA	NA	5.67194	0.033562	1.27811e-06	NA	NA	NA	NA	NA	NA
cg00864183	NA	NA	NA	NA	NA	NA	NA	NA	NA	NA	NA	NA	NA	NA	NA	NA	NA	NA	NA	NA	NA	NA	NA	NA	3.9919	0.0472848	0.000183683	NA	NA	NA	NA	NA	NA
cg00890485	4.32184	0.0302854	0.000136192	NA	NA	NA	NA	NA	NA	NA	NA	NA	NA	NA	NA	NA	NA	NA	NA	NA	NA	NA	NA	NA	3.83107	0.0379163	0.000291113	NA	NA	NA	NA	NA	NA
cg00933692	NA	NA	NA	NA	NA	NA	NA	NA	NA	NA	NA	NA	NA	NA	NA	NA	NA	NA	NA	NA	NA	NA	NA	NA	4.00166	0.0145126	0.000178596	NA	NA	NA	NA	NA	NA
cg00935993	5.90566	0.0195602	1.34027e-06	NA	NA	NA	NA	NA	NA	NA	NA	NA	NA	NA	NA	NA	NA	NA	NA	NA	NA	NA	NA	NA	6.24943	0.0433112	2.23485e-07	NA	NA	NA	NA	NA	NA
cg00939432	NA	NA	NA	NA	NA	NA	NA	NA	NA	NA	NA	NA	NA	NA	NA	NA	NA	NA	NA	NA	NA	NA	NA	NA	3.85553	0.00399152	0.000271495	NA	NA	NA	NA	NA	NA
cg00975791	NA	NA	NA	NA	NA	NA	NA	NA	NA	NA	NA	NA	NA	NA	NA	NA	NA	NA	NA	NA	NA	NA	NA	NA	4.32597	0.0296082	6.97833e-05	NA	NA	NA	NA	NA	NA
cg00982641	NA	NA	NA	NA	NA	NA	NA	NA	NA	NA	NA	NA	NA	NA	NA	NA	NA	NA	NA	NA	NA	NA	NA	NA	3.99242	0.0381996	0.000183407	NA	NA	NA	NA	NA	NA
cg00993799	NA	NA	NA	NA	NA	NA	NA	NA	NA	NA	NA	NA	NA	NA	NA	NA	NA	NA	NA	NA	NA	NA	NA	NA	4.46816	0.0250832	4.60406e-05	NA	NA	NA	NA	NA	NA
cg01054478	NA	NA	NA	NA	NA	NA	NA	NA	NA	NA	NA	NA	NA	NA	NA	NA	NA	NA	NA	NA	NA	NA	NA	NA	3.82462	0.00140655	0.000296513	NA	NA	NA	NA	NA	NA
cg01063579	NA	NA	NA	NA	NA	NA	NA	NA	NA	NA	NA	NA	NA	NA	NA	NA	NA	NA	NA	NA	NA	NA	NA	NA	5.36767	0.0174118	3.18801e-06	NA	NA	NA	NA	NA	NA
cg01089395	NA	NA	NA	NA	NA	NA	NA	NA	NA	NA	NA	NA	NA	NA	NA	NA	NA	NA	NA	NA	NA	NA	NA	NA	4.53776	0.0340276	3.75325e-05	NA	NA	NA	NA	NA	NA
cg01118031	4.27489	0.0422718	0.00015558	NA	NA	NA	NA	NA	NA	NA	NA	NA	NA	NA	NA	NA	NA	NA	NA	NA	NA	NA	NA	NA	NA	NA	NA	NA	NA	NA	NA	NA	NA
cg01129004	NA	NA	NA	NA	NA	NA	NA	NA	NA	NA	NA	NA	NA	NA	NA	NA	NA	NA	NA	NA	NA	NA	NA	NA	4.5012	0.028773	4.17868e-05	NA	NA	NA	NA	NA	NA
cg01148781	4.21305	0.0406418	0.000185293	NA	NA	NA	NA	NA	NA	NA	NA	NA	NA	NA	NA	NA	NA	NA	NA	NA	NA	NA	NA	NA	NA	NA	NA	NA	NA	NA	NA	NA	NA
cg01151135	NA	NA	NA	NA	NA	NA	NA	NA	NA	NA	NA	NA	NA	NA	NA	NA	NA	NA	NA	NA	NA	NA	NA	NA	4.56393	0.014094	3.47528e-05	NA	NA	NA	NA	NA	NA
cg01163842	NA	NA	NA	NA	NA	NA	NA	NA	NA	NA	NA	NA	9.8451	0.0213211	3.64076e-07	NA	NA	NA	NA	NA	NA	NA	NA	NA	NA	NA	NA	NA	NA	NA	-8.88742	0.00656994	1.48923e-06
cg01177928	4.14117	0.0223175	0.000226869	NA	NA	NA	NA	NA	NA	NA	NA	NA	NA	NA	NA	NA	NA	NA	NA	NA	NA	NA	NA	NA	4.42886	0.00325273	5.16596e-05	NA	NA	NA	NA	NA	NA
cg01226963	NA	NA	NA	NA	NA	NA	NA	NA	NA	NA	NA	NA	NA	NA	NA	NA	NA	NA	NA	NA	NA	NA	NA	NA	3.76418	0.0221192	0.000352148	NA	NA	NA	NA	NA	NA
cg01240444	NA	NA	NA	NA	NA	NA	NA	NA	NA	NA	NA	NA	NA	NA	NA	NA	NA	NA	NA	NA	NA	NA	NA	NA	4.75195	0.00768383	1.99582e-05	NA	NA	NA	NA	NA	NA
cg01394199	5.01996	0.043949	1.82322e-05	NA	NA	NA	NA	NA	NA	NA	NA	NA	NA	NA	NA	NA	NA	NA	NA	NA	NA	NA	NA	NA	4.63204	0.0074731	2.84375e-05	NA	NA	NA	NA	NA	NA
cg01429360	4.23302	0.033081	0.000175135	NA	NA	NA	NA	NA	NA	NA	NA	NA	NA	NA	NA	NA	NA	NA	NA	NA	NA	NA	NA	NA	NA	NA	NA	NA	NA	NA	NA	NA	NA
cg01452169	4.13483	0.0263905	0.000230948	NA	NA	NA	NA	NA	NA	NA	NA	NA	NA	NA	NA	NA	NA	NA	NA	NA	NA	NA	NA	NA	3.81105	0.0282066	0.000308202	NA	NA	NA	NA	NA	NA
cg01490894	NA	NA	NA	NA	NA	NA	NA	NA	NA	NA	NA	NA	NA	NA	NA	NA	NA	NA	NA	NA	NA	NA	NA	NA	4.03891	0.0304492	0.000160437	NA	NA	NA	NA	NA	NA
cg01518889	NA	NA	NA	NA	NA	NA	NA	NA	NA	NA	NA	NA	NA	NA	NA	NA	NA	NA	NA	NA	NA	NA	NA	NA	3.71932	0.0165928	0.00039994	NA	NA	NA	NA	NA	NA
cg01521917	4.06928	0.00849518	0.000277549	NA	NA	NA	NA	NA	NA	NA	NA	NA	NA	NA	NA	NA	NA	NA	NA	NA	NA	NA	NA	NA	NA	NA	NA	NA	NA	NA	NA	NA	NA
cg01557883	NA	NA	NA	NA	NA	NA	NA	NA	NA	NA	NA	NA	NA	NA	NA	NA	NA	NA	NA	NA	NA	NA	NA	NA	NA	NA	NA	-5.61727	0.0456289	4.85011e-06	NA	NA	NA
cg01560642	NA	NA	NA	NA	NA	NA	NA	NA	NA	NA	NA	NA	NA	NA	NA	NA	NA	NA	NA	NA	NA	NA	NA	NA	4.78072	0.0474727	1.83297e-05	NA	NA	NA	NA	NA	NA
cg01572513	NA	NA	NA	NA	NA	NA	NA	NA	NA	NA	NA	NA	NA	NA	NA	NA	NA	NA	NA	NA	NA	NA	NA	NA	3.88102	0.0321939	0.000252423	NA	NA	NA	NA	NA	NA
cg01582438	NA	NA	NA	NA	NA	NA	NA	NA	NA	NA	NA	NA	NA	NA	NA	NA	NA	NA	NA	NA	NA	NA	NA	NA	3.95741	0.0433719	0.000202815	NA	NA	NA	NA	NA	NA
cg01585293	4.2044	0.0221466	0.000189868	NA	NA	NA	NA	NA	NA	NA	NA	NA	NA	NA	NA	NA	NA	NA	NA	NA	NA	NA	NA	NA	NA	NA	NA	NA	NA	NA	NA	NA	NA
cg01595640	NA	NA	NA	NA	NA	NA	NA	NA	NA	NA	NA	NA	NA	NA	NA	NA	NA	NA	NA	NA	NA	NA	NA	NA	3.79001	0.0127739	0.000327229	NA	NA	NA	NA	NA	NA
cg01646109	NA	NA	NA	NA	NA	NA	NA	NA	NA	NA	NA	NA	NA	NA	NA	NA	NA	NA	NA	NA	NA	NA	NA	NA	4.33465	0.010744	6.8039e-05	NA	NA	NA	NA	NA	NA
cg01651570	NA	NA	NA	NA	NA	NA	NA	NA	NA	NA	NA	NA	NA	NA	NA	NA	NA	NA	NA	NA	NA	NA	NA	NA	3.5984	0.0332363	0.000562594	NA	NA	NA	NA	NA	NA
cg01687558	NA	NA	NA	NA	NA	NA	NA	NA	NA	NA	NA	NA	NA	NA	NA	NA	NA	NA	NA	NA	NA	NA	NA	NA	4.76685	0.0380558	1.90975e-05	NA	NA	NA	NA	NA	NA
cg01695620	NA	NA	NA	NA	NA	NA	NA	NA	NA	NA	NA	NA	NA	NA	NA	NA	NA	NA	NA	NA	NA	NA	NA	NA	4.12936	0.0121365	0.000123555	NA	NA	NA	NA	NA	NA
cg01712692	NA	NA	NA	NA	NA	NA	NA	NA	NA	NA	NA	NA	NA	NA	NA	NA	NA	NA	NA	NA	NA	NA	NA	NA	3.82081	0.0423206	0.000299756	7.08488	0.00801542	1.09919e-06	NA	NA	NA
cg01723148	NA	NA	NA	NA	NA	NA	NA	NA	NA	NA	NA	NA	NA	NA	NA	NA	NA	NA	NA	NA	NA	NA	NA	NA	4.46137	0.0182092	4.69662e-05	NA	NA	NA	NA	NA	NA
cg01737100	NA	NA	NA	NA	NA	NA	NA	NA	NA	NA	NA	NA	NA	NA	NA	NA	NA	NA	NA	NA	NA	NA	NA	NA	4.20988	0.0428654	9.78354e-05	NA	NA	NA	NA	NA	NA
cg01756730	NA	NA	NA	NA	NA	NA	NA	NA	NA	NA	NA	NA	NA	NA	NA	NA	NA	NA	NA	NA	NA	NA	NA	NA	3.62047	0.0499536	0.000528725	NA	NA	NA	NA	NA	NA
cg01760475	4.83515	0.0307093	3.1206e-05	NA	NA	NA	NA	NA	NA	NA	NA	NA	NA	NA	NA	NA	NA	NA	NA	NA	NA	NA	NA	NA	4.41153	0.0295088	5.4348e-05	NA	NA	NA	NA	NA	NA
cg01763575	NA	NA	NA	NA	NA	NA	NA	NA	NA	NA	NA	NA	NA	NA	NA	NA	NA	NA	5.54342	0.0132837	6.10146e-06	NA	NA	NA	NA	NA	NA	NA	NA	NA	NA	NA	NA
cg01768131	NA	NA	NA	NA	NA	NA	NA	NA	NA	NA	NA	NA	NA	NA	NA	NA	NA	NA	NA	NA	NA	NA	NA	NA	5.44812	0.00581456	2.50461e-06	NA	NA	NA	NA	NA	NA
cg01768686	NA	NA	NA	NA	NA	NA	NA	NA	NA	NA	NA	NA	NA	NA	NA	NA	NA	NA	NA	NA	NA	NA	NA	NA	4.05189	0.0289271	0.000154545	NA	NA	NA	NA	NA	NA
cg01785722	NA	NA	NA	NA	NA	NA	NA	NA	NA	NA	NA	NA	NA	NA	NA	NA	NA	NA	NA	NA	NA	NA	NA	NA	3.97912	0.0409589	0.000190554	NA	NA	NA	NA	NA	NA
cg01806170	NA	NA	NA	NA	NA	NA	NA	NA	NA	NA	NA	NA	NA	NA	NA	NA	NA	NA	NA	NA	NA	NA	NA	NA	4.40928	0.00272912	5.47063e-05	NA	NA	NA	NA	NA	NA
cg01819142	4.65545	0.0189013	5.24547e-05	NA	NA	NA	NA	NA	NA	NA	NA	NA	NA	NA	NA	NA	NA	NA	NA	NA	NA	NA	NA	NA	4.76315	0.0391962	1.93077e-05	NA	NA	NA	NA	NA	NA
cg01824969	NA	NA	NA	NA	NA	NA	NA	NA	NA	NA	NA	NA	NA	NA	NA	NA	NA	NA	NA	NA	NA	NA	NA	NA	4.04885	0.0330844	0.000155904	NA	NA	NA	NA	NA	NA
cg01825831	NA	NA	NA	NA	NA	NA	NA	NA	NA	NA	NA	NA	NA	NA	NA	NA	NA	NA	NA	NA	NA	NA	NA	NA	3.99524	0.030102	0.000181924	NA	NA	NA	NA	NA	NA
cg01835695	4.41714	0.00261081	0.000103854	NA	NA	NA	NA	NA	NA	NA	NA	NA	NA	NA	NA	NA	NA	NA	NA	NA	NA	NA	NA	NA	4.3536	0.00159517	6.43775e-05	NA	NA	NA	NA	NA	NA
cg01942797	4.2511	0.0499347	0.000166411	NA	NA	NA	NA	NA	NA	NA	NA	NA	NA	NA	NA	NA	NA	NA	NA	NA	NA	NA	NA	NA	NA	NA	NA	NA	NA	NA	NA	NA	NA
cg01962509	NA	NA	NA	NA	NA	NA	NA	NA	NA	NA	NA	NA	NA	NA	NA	NA	NA	NA	NA	NA	NA	NA	NA	NA	3.76754	0.0312612	0.00034881	NA	NA	NA	NA	NA	NA
cg01979888	4.31394	0.0236583	0.00013928	NA	NA	NA	NA	NA	NA	NA	NA	NA	NA	NA	NA	NA	NA	NA	NA	NA	NA	NA	NA	NA	3.80621	0.0104841	0.000312481	NA	NA	NA	NA	NA	NA
cg01994486	NA	NA	NA	NA	NA	NA	NA	NA	NA	NA	NA	NA	NA	NA	NA	NA	NA	NA	NA	NA	NA	NA	NA	NA	4.15961	0.0433513	0.000113194	NA	NA	NA	NA	NA	NA
cg02064267	NA	NA	NA	NA	NA	NA	NA	NA	NA	NA	NA	NA	NA	NA	NA	NA	NA	NA	NA	NA	NA	NA	NA	NA	4.01788	0.0201364	0.000170456	NA	NA	NA	NA	NA	NA
cg02067846	NA	NA	NA	NA	NA	NA	NA	NA	NA	NA	NA	NA	NA	NA	NA	NA	NA	NA	NA	NA	NA	NA	NA	NA	3.5946	0.00697238	0.000568627	NA	NA	NA	NA	NA	NA
cg02081701	NA	NA	NA	NA	NA	NA	NA	NA	NA	NA	NA	NA	NA	NA	NA	NA	NA	NA	NA	NA	NA	NA	NA	NA	3.58782	0.0227514	0.000579571	NA	NA	NA	NA	NA	NA
cg02120582	4.17774	0.0185604	0.000204689	NA	NA	NA	NA	NA	NA	NA	NA	NA	NA	NA	NA	NA	NA	NA	NA	NA	NA	NA	NA	NA	4.14477	0.0132414	0.000118167	NA	NA	NA	NA	NA	NA
cg02139871	NA	NA	NA	NA	NA	NA	NA	NA	NA	NA	NA	NA	NA	NA	NA	NA	NA	NA	NA	NA	NA	NA	NA	NA	3.94292	0.0219046	0.000211425	NA	NA	NA	NA	NA	NA
cg02167193	NA	NA	NA	NA	NA	NA	NA	NA	NA	NA	NA	NA	NA	NA	NA	NA	NA	NA	NA	NA	NA	NA	NA	NA	3.57666	0.0461971	0.000598017	NA	NA	NA	NA	NA	NA
cg02170525	4.92713	0.0167221	2.38919e-05	NA	NA	NA	NA	NA	NA	NA	NA	NA	NA	NA	NA	NA	NA	NA	NA	NA	NA	NA	NA	NA	NA	NA	NA	NA	NA	NA	NA	NA	NA
cg02202169	NA	NA	NA	NA	NA	NA	NA	NA	NA	NA	NA	NA	NA	NA	NA	NA	NA	NA	NA	NA	NA	NA	NA	NA	3.9475	0.0258589	0.000208661	NA	NA	NA	NA	NA	NA
cg02212009	NA	NA	NA	NA	NA	NA	NA	NA	NA	NA	NA	NA	NA	NA	NA	NA	NA	NA	NA	NA	NA	NA	NA	NA	3.59114	0.0416377	0.000574184	NA	NA	NA	NA	NA	NA
cg02258246	NA	NA	NA	NA	NA	NA	NA	NA	NA	NA	NA	NA	NA	NA	NA	NA	NA	NA	NA	NA	NA	NA	NA	NA	4.07091	0.0303869	0.000146294	NA	NA	NA	NA	NA	NA
cg02273647	NA	NA	NA	NA	NA	NA	NA	NA	NA	NA	NA	NA	NA	NA	NA	NA	NA	NA	NA	NA	NA	5.33927	0.0351667	3.10254e-06	NA	NA	NA	NA	NA	NA	NA	NA	NA
cg02280532	4.07726	0.0270812	0.000271416	NA	NA	NA	NA	NA	NA	NA	NA	NA	NA	NA	NA	NA	NA	NA	NA	NA	NA	NA	NA	NA	3.86164	0.0120721	0.000266794	NA	NA	NA	NA	NA	NA
cg02288825	NA	NA	NA	NA	NA	NA	NA	NA	NA	NA	NA	NA	NA	NA	NA	NA	NA	NA	NA	NA	NA	NA	NA	NA	4.16676	0.035412	0.000110874	NA	NA	NA	NA	NA	NA
cg02298094	NA	NA	NA	NA	NA	NA	NA	NA	NA	NA	NA	NA	NA	NA	NA	NA	NA	NA	NA	NA	NA	NA	NA	NA	3.79038	0.0368311	0.000326884	NA	NA	NA	NA	NA	NA
cg02300825	6.31855	0.0396928	3.91676e-07	NA	NA	NA	6.40588	0.041053	5.36986e-06	NA	NA	NA	NA	NA	NA	NA	NA	NA	NA	NA	NA	NA	NA	NA	6.28813	0.04711	1.98769e-07	6.35317	0.0345056	6.07218e-06	NA	NA	NA
cg02308560	4.69663	0.0119401	4.65841e-05	NA	NA	NA	NA	NA	NA	NA	NA	NA	NA	NA	NA	NA	NA	NA	NA	NA	NA	NA	NA	NA	NA	NA	NA	NA	NA	NA	NA	NA	NA
cg02320454	6.83283	0.028589	8.40273e-08	NA	NA	NA	NA	NA	NA	NA	NA	NA	NA	NA	NA	NA	NA	NA	NA	NA	NA	NA	NA	NA	6.60569	0.0255289	7.59078e-08	NA	NA	NA	NA	NA	NA
cg02375289	NA	NA	NA	NA	NA	NA	NA	NA	NA	NA	NA	NA	NA	NA	NA	NA	NA	NA	NA	NA	NA	NA	NA	NA	3.74576	0.0447948	0.000371058	NA	NA	NA	NA	NA	NA
cg02377915	4.39456	0.0084034	0.000110754	NA	NA	NA	NA	NA	NA	NA	NA	NA	NA	NA	NA	NA	NA	NA	NA	NA	NA	NA	NA	NA	4.05492	0.0319065	0.000153197	NA	NA	NA	NA	NA	NA
cg02381898	4.72064	0.0331415	4.34643e-05	NA	NA	NA	NA	NA	NA	NA	NA	NA	NA	NA	NA	NA	NA	NA	NA	NA	NA	NA	NA	NA	NA	NA	NA	NA	NA	NA	NA	NA	NA
cg02388709	NA	NA	NA	NA	NA	NA	NA	NA	NA	NA	NA	NA	NA	NA	NA	NA	NA	NA	NA	NA	NA	NA	NA	NA	3.88835	0.0043594	0.000247186	NA	NA	NA	NA	NA	NA
cg02389851	4.40655	0.0181344	0.000107036	NA	NA	NA	NA	NA	NA	NA	NA	NA	NA	NA	NA	NA	NA	NA	NA	NA	NA	NA	NA	NA	NA	NA	NA	NA	NA	NA	NA	NA	NA
cg02390725	NA	NA	NA	NA	NA	NA	NA	NA	NA	NA	NA	NA	NA	NA	NA	NA	NA	NA	NA	NA	NA	NA	NA	NA	3.66221	0.0152616	0.00047003	NA	NA	NA	NA	NA	NA
cg02408775	5.30638	0.0146591	7.88214e-06	NA	NA	NA	NA	NA	NA	NA	NA	NA	NA	NA	NA	NA	NA	NA	NA	NA	NA	NA	NA	NA	5.11784	0.013414	6.7296e-06	NA	NA	NA	NA	NA	NA
cg02409878	6.37677	0.0200407	3.29149e-07	NA	NA	NA	NA	NA	NA	NA	NA	NA	NA	NA	NA	NA	NA	NA	NA	NA	NA	NA	NA	NA	5.72838	0.00444515	1.07833e-06	NA	NA	NA	NA	NA	NA
cg02422694	4.60549	0.0184769	6.05647e-05	NA	NA	NA	NA	NA	NA	NA	NA	NA	NA	NA	NA	NA	NA	NA	NA	NA	NA	NA	NA	NA	4.97598	0.0392499	1.02687e-05	NA	NA	NA	NA	NA	NA
cg02443126	NA	NA	NA	NA	NA	NA	NA	NA	NA	NA	NA	NA	NA	NA	NA	NA	NA	NA	NA	NA	NA	NA	NA	NA	3.81828	0.00507051	0.000301922	NA	NA	NA	NA	NA	NA
cg02459090	NA	NA	NA	NA	NA	NA	NA	NA	NA	NA	NA	NA	NA	NA	NA	NA	NA	NA	NA	NA	NA	NA	NA	NA	4.22477	0.0144122	9.36936e-05	NA	NA	NA	NA	NA	NA
cg02469838	4.88147	0.0313571	2.72821e-05	NA	NA	NA	NA	NA	NA	NA	NA	NA	NA	NA	NA	NA	NA	NA	NA	NA	NA	NA	NA	NA	4.67268	0.0282322	2.52255e-05	NA	NA	NA	NA	NA	NA
cg02473600	NA	NA	NA	NA	NA	NA	NA	NA	NA	NA	NA	NA	NA	NA	NA	NA	NA	NA	NA	NA	NA	NA	NA	NA	4.07739	0.00451072	0.00014358	NA	NA	NA	NA	NA	NA
cg02475695	NA	NA	NA	NA	NA	NA	NA	NA	NA	NA	NA	NA	NA	NA	NA	NA	NA	NA	NA	NA	NA	NA	NA	NA	NA	NA	NA	5.80754	0.0216721	2.16114e-05	NA	NA	NA
cg02491701	NA	NA	NA	NA	NA	NA	NA	NA	NA	NA	NA	NA	NA	NA	NA	NA	NA	NA	NA	NA	NA	NA	NA	NA	4.40884	0.00186298	5.47772e-05	NA	NA	NA	NA	NA	NA
cg02507677	NA	NA	NA	NA	NA	NA	NA	NA	NA	NA	NA	NA	NA	NA	NA	NA	NA	NA	NA	NA	NA	NA	NA	NA	3.66693	0.0223642	0.00046381	NA	NA	NA	NA	NA	NA
cg02509058	NA	NA	NA	NA	NA	NA	NA	NA	NA	NA	NA	NA	NA	NA	NA	NA	NA	NA	NA	NA	NA	NA	NA	NA	3.57316	0.0169537	0.000603926	NA	NA	NA	NA	NA	NA
cg02553516	5.22765	0.0435636	9.93153e-06	NA	NA	NA	NA	NA	NA	NA	NA	NA	NA	NA	NA	NA	NA	NA	NA	NA	NA	NA	NA	NA	NA	NA	NA	NA	NA	NA	NA	NA	NA
cg02561771	NA	NA	NA	NA	NA	NA	NA	NA	NA	NA	NA	NA	NA	NA	NA	NA	NA	NA	NA	NA	NA	NA	NA	NA	3.82654	0.0191698	0.000294896	NA	NA	NA	NA	NA	NA
cg02574175	NA	NA	NA	NA	NA	NA	NA	NA	NA	NA	NA	NA	NA	NA	NA	NA	NA	NA	NA	NA	NA	NA	NA	NA	4.22537	0.0237705	9.35306e-05	NA	NA	NA	NA	NA	NA
cg02621151	NA	NA	NA	NA	NA	NA	NA	NA	NA	NA	NA	NA	NA	NA	NA	NA	NA	NA	NA	NA	NA	NA	NA	NA	3.84991	0.014023	0.000275882	NA	NA	NA	NA	NA	NA
cg02635726	4.45616	0.0310524	9.29097e-05	NA	NA	NA	NA	NA	NA	NA	NA	NA	NA	NA	NA	NA	NA	NA	NA	NA	NA	NA	NA	NA	NA	NA	NA	NA	NA	NA	NA	NA	NA
cg02659920	4.31791	0.0307715	0.00013772	NA	NA	NA	NA	NA	NA	NA	NA	NA	NA	NA	NA	NA	NA	NA	NA	NA	NA	NA	NA	NA	4.54499	0.0102473	3.67432e-05	NA	NA	NA	NA	NA	NA
cg02675308	4.76218	0.00819375	3.85483e-05	NA	NA	NA	NA	NA	NA	NA	NA	NA	NA	NA	NA	NA	NA	NA	NA	NA	NA	NA	NA	NA	4.43835	0.00577777	5.02433e-05	NA	NA	NA	NA	NA	NA
cg02709432	5.97567	0.0199289	1.08841e-06	NA	NA	NA	NA	NA	NA	NA	NA	NA	NA	NA	NA	NA	NA	NA	NA	NA	NA	NA	NA	NA	5.7822	0.0289116	9.16899e-07	NA	NA	NA	NA	NA	NA
cg02736548	NA	NA	NA	NA	NA	NA	NA	NA	NA	NA	NA	NA	NA	NA	NA	NA	NA	NA	NA	NA	NA	NA	NA	NA	3.70413	0.0367287	0.000417516	NA	NA	NA	NA	NA	NA
cg02753511	4.06044	0.00708219	0.000284496	NA	NA	NA	NA	NA	NA	NA	NA	NA	NA	NA	NA	NA	NA	NA	NA	NA	NA	NA	NA	NA	4.00594	0.0342214	0.000176411	NA	NA	NA	NA	NA	NA
cg02757667	4.08765	0.0365189	0.00026363	NA	NA	NA	NA	NA	NA	NA	NA	NA	NA	NA	NA	NA	NA	NA	NA	NA	NA	NA	NA	NA	NA	NA	NA	NA	NA	NA	NA	NA	NA
cg02785555	NA	NA	NA	NA	NA	NA	NA	NA	NA	NA	NA	NA	NA	NA	NA	NA	NA	NA	NA	NA	NA	NA	NA	NA	3.96738	0.0304835	0.000197092	NA	NA	NA	NA	NA	NA
cg02822788	4.07021	0.0295284	0.000276826	NA	NA	NA	NA	NA	NA	NA	NA	NA	NA	NA	NA	NA	NA	NA	NA	NA	NA	NA	NA	NA	NA	NA	NA	NA	NA	NA	NA	NA	NA
cg02845591	4.55093	0.0126845	7.08363e-05	NA	NA	NA	NA	NA	NA	NA	NA	NA	NA	NA	NA	NA	NA	NA	NA	NA	NA	NA	NA	NA	4.40461	0.0147727	5.54605e-05	NA	NA	NA	NA	NA	NA
cg02851087	4.19345	0.0201498	0.000195827	NA	NA	NA	NA	NA	NA	NA	NA	NA	NA	NA	NA	NA	NA	NA	NA	NA	NA	NA	NA	NA	4.48671	0.0201828	4.36028e-05	NA	NA	NA	NA	NA	NA
cg02857760	4.35622	0.0378758	0.000123521	NA	NA	NA	NA	NA	NA	NA	NA	NA	NA	NA	NA	NA	NA	NA	NA	NA	NA	NA	NA	NA	4.17344	0.00553559	0.000108748	NA	NA	NA	NA	NA	NA
cg02872354	NA	NA	NA	NA	NA	NA	NA	NA	NA	NA	NA	NA	NA	NA	NA	NA	NA	NA	NA	NA	NA	NA	NA	NA	4.21029	0.0272068	9.77199e-05	NA	NA	NA	NA	NA	NA
cg02884176	NA	NA	NA	NA	NA	NA	NA	NA	NA	NA	NA	NA	NA	NA	NA	NA	NA	NA	NA	NA	NA	NA	NA	NA	4.1052	0.0494986	0.000132499	NA	NA	NA	NA	NA	NA
cg02913507	4.17832	0.0488118	0.000204351	NA	NA	NA	NA	NA	NA	NA	NA	NA	NA	NA	NA	NA	NA	NA	NA	NA	NA	NA	NA	NA	3.70646	0.0365261	0.000414769	NA	NA	NA	NA	NA	NA
cg02926622	NA	NA	NA	NA	NA	NA	NA	NA	NA	NA	NA	NA	NA	NA	NA	NA	NA	NA	NA	NA	NA	NA	NA	NA	3.60313	0.0260684	0.000555149	NA	NA	NA	NA	NA	NA
cg02928885	NA	NA	NA	NA	NA	NA	NA	NA	NA	NA	NA	NA	NA	NA	NA	NA	NA	NA	NA	NA	NA	NA	NA	NA	3.65912	0.0481063	0.000474154	NA	NA	NA	NA	NA	NA
cg02936740	NA	NA	NA	NA	NA	NA	NA	NA	NA	NA	NA	NA	NA	NA	NA	NA	NA	NA	NA	NA	NA	NA	NA	NA	3.68658	0.0120706	0.000438757	NA	NA	NA	NA	NA	NA
cg02947361	4.08145	0.00205156	0.000268249	NA	NA	NA	NA	NA	NA	NA	NA	NA	NA	NA	NA	NA	NA	NA	NA	NA	NA	NA	NA	NA	4.05376	0.0155059	0.000153713	NA	NA	NA	NA	NA	NA
cg02952361	NA	NA	NA	NA	NA	NA	NA	NA	NA	NA	NA	NA	NA	NA	NA	NA	NA	NA	NA	NA	NA	NA	NA	NA	3.84441	0.0497323	0.000280245	NA	NA	NA	NA	NA	NA
cg02953562	4.28475	0.0287061	0.000151295	NA	NA	NA	NA	NA	NA	NA	NA	NA	NA	NA	NA	NA	NA	NA	NA	NA	NA	NA	NA	NA	NA	NA	NA	NA	NA	NA	NA	NA	NA
cg02959637	4.88463	0.0391605	2.70329e-05	NA	NA	NA	NA	NA	NA	NA	NA	NA	NA	NA	NA	NA	NA	NA	NA	NA	NA	NA	NA	NA	5.06386	0.0358057	7.90485e-06	NA	NA	NA	NA	NA	NA
cg02964396	NA	NA	NA	NA	NA	NA	NA	NA	NA	NA	NA	NA	NA	NA	NA	NA	NA	NA	NA	NA	NA	NA	NA	NA	3.75231	0.0163068	0.000364226	NA	NA	NA	NA	NA	NA
cg02973416	4.28098	0.0421331	0.000152917	NA	NA	NA	NA	NA	NA	NA	NA	NA	NA	NA	NA	NA	NA	NA	NA	NA	NA	NA	NA	NA	4.27959	0.017861	7.98851e-05	NA	NA	NA	NA	NA	NA
cg03032552	4.50982	0.00166262	7.96916e-05	NA	NA	NA	NA	NA	NA	NA	NA	NA	NA	NA	NA	NA	NA	NA	NA	NA	NA	NA	NA	NA	5.39436	0.0372031	2.9429e-06	NA	NA	NA	NA	NA	NA
cg03039974	4.63984	0.015576	5.48666e-05	NA	NA	NA	NA	NA	NA	NA	NA	NA	NA	NA	NA	NA	NA	NA	NA	NA	NA	NA	NA	NA	4.01274	0.0364272	0.000172994	NA	NA	NA	NA	NA	NA
cg03045231	5.16003	0.0359672	1.21081e-05	NA	NA	NA	NA	NA	NA	NA	NA	NA	NA	NA	NA	NA	NA	NA	NA	NA	NA	NA	NA	NA	4.02561	0.0243897	0.000166701	NA	NA	NA	NA	NA	NA
cg03049691	NA	NA	NA	NA	NA	NA	NA	NA	NA	NA	NA	NA	NA	NA	NA	NA	NA	NA	NA	NA	NA	NA	NA	NA	3.95188	0.0389433	0.00020606	NA	NA	NA	NA	NA	NA
cg03070194	NA	NA	NA	NA	NA	NA	NA	NA	NA	NA	NA	NA	NA	NA	NA	NA	NA	NA	NA	NA	NA	NA	NA	NA	3.81954	0.0103624	0.000300837	NA	NA	NA	NA	NA	NA
cg03079712	NA	NA	NA	NA	NA	NA	NA	NA	NA	NA	NA	NA	NA	NA	NA	NA	NA	NA	NA	NA	NA	NA	NA	NA	4.79373	0.0304308	1.76372e-05	NA	NA	NA	NA	NA	NA
cg03113878	4.42997	0.0485012	0.000100122	NA	NA	NA	NA	NA	NA	NA	NA	NA	NA	NA	NA	NA	NA	NA	NA	NA	NA	NA	NA	NA	4.3793	0.00837664	5.97197e-05	NA	NA	NA	NA	NA	NA
cg03207391	NA	NA	NA	NA	NA	NA	NA	NA	NA	NA	NA	NA	NA	NA	NA	NA	NA	NA	NA	NA	NA	NA	NA	NA	3.94294	0.0389853	0.000211409	NA	NA	NA	NA	NA	NA
cg03263514	NA	NA	NA	NA	NA	NA	NA	NA	NA	NA	NA	NA	NA	NA	NA	NA	NA	NA	NA	NA	NA	NA	NA	NA	3.74131	0.00593647	0.000375774	NA	NA	NA	NA	NA	NA
cg03284866	4.30779	0.028422	0.000141731	NA	NA	NA	NA	NA	NA	NA	NA	NA	NA	NA	NA	NA	NA	NA	NA	NA	NA	NA	NA	NA	NA	NA	NA	NA	NA	NA	NA	NA	NA
cg03314195	NA	NA	NA	NA	NA	NA	NA	NA	NA	NA	NA	NA	NA	NA	NA	NA	NA	NA	NA	NA	NA	NA	NA	NA	4.11348	0.0153198	0.000129363	NA	NA	NA	NA	NA	NA
cg03329165	4.53363	0.0164633	7.44387e-05	NA	NA	NA	NA	NA	NA	NA	NA	NA	NA	NA	NA	NA	NA	NA	NA	NA	NA	NA	NA	NA	3.97015	0.00245287	0.000195529	NA	NA	NA	NA	NA	NA
cg03352168	4.30476	0.0109799	0.000142952	NA	NA	NA	NA	NA	NA	NA	NA	NA	NA	NA	NA	NA	NA	NA	NA	NA	NA	NA	NA	NA	NA	NA	NA	NA	NA	NA	NA	NA	NA
cg03352428	NA	NA	NA	NA	NA	NA	NA	NA	NA	NA	NA	NA	NA	NA	NA	NA	NA	NA	NA	NA	NA	NA	NA	NA	3.73626	0.00755353	0.000381191	NA	NA	NA	NA	NA	NA
cg03352655	NA	NA	NA	NA	NA	NA	NA	NA	NA	NA	NA	NA	NA	NA	NA	NA	NA	NA	NA	NA	NA	NA	NA	NA	3.6705	0.0271212	0.000459162	NA	NA	NA	NA	NA	NA
cg03354810	4.63934	0.0400943	5.49461e-05	NA	NA	NA	NA	NA	NA	NA	NA	NA	NA	NA	NA	NA	NA	NA	NA	NA	NA	NA	NA	NA	NA	NA	NA	NA	NA	NA	NA	NA	NA
cg03367519	4.06957	0.0255684	0.000277321	NA	NA	NA	NA	NA	NA	NA	NA	NA	NA	NA	NA	NA	NA	NA	NA	NA	NA	NA	NA	NA	NA	NA	NA	NA	NA	NA	NA	NA	NA
cg03372659	4.92998	0.046382	2.36948e-05	NA	NA	NA	NA	NA	NA	NA	NA	NA	NA	NA	NA	NA	NA	NA	NA	NA	NA	NA	NA	NA	4.1381	0.0176891	0.000120471	NA	NA	NA	NA	NA	NA
cg03396103	4.71533	0.0319262	4.41357e-05	NA	NA	NA	NA	NA	NA	NA	NA	NA	NA	NA	NA	NA	NA	NA	NA	NA	NA	NA	NA	NA	4.41394	0.00989425	5.39665e-05	NA	NA	NA	NA	NA	NA
cg03401096	NA	NA	NA	NA	NA	NA	NA	NA	NA	NA	NA	NA	NA	NA	NA	NA	NA	NA	NA	NA	NA	NA	NA	NA	4.05894	0.017366	0.000151432	NA	NA	NA	NA	NA	NA
cg03414569	NA	NA	NA	NA	NA	NA	NA	NA	NA	NA	NA	NA	NA	NA	NA	NA	NA	NA	NA	NA	NA	NA	NA	NA	4.30951	0.00749757	7.32159e-05	NA	NA	NA	NA	NA	NA
cg03419885	NA	NA	NA	NA	NA	NA	NA	NA	NA	NA	NA	NA	NA	NA	NA	NA	NA	NA	NA	NA	NA	NA	NA	NA	5.58328	0.0270862	1.66882e-06	NA	NA	NA	NA	NA	NA
cg03434509	4.82991	0.0354526	3.16837e-05	NA	NA	NA	NA	NA	NA	NA	NA	NA	NA	NA	NA	NA	NA	NA	NA	NA	NA	NA	NA	NA	NA	NA	NA	NA	NA	NA	NA	NA	NA
cg03454711	NA	NA	NA	NA	NA	NA	5.89568	0.0475761	1.76122e-05	NA	NA	NA	NA	NA	NA	NA	NA	NA	NA	NA	NA	NA	NA	NA	NA	NA	NA	NA	NA	NA	NA	NA	NA
cg03489712	NA	NA	NA	NA	NA	NA	NA	NA	NA	NA	NA	NA	NA	NA	NA	NA	NA	NA	NA	NA	NA	NA	NA	NA	4.15624	0.021949	0.000114303	NA	NA	NA	NA	NA	NA
cg03505148	NA	NA	NA	NA	NA	NA	7.47084	0.0456999	4.45532e-07	NA	NA	NA	NA	NA	NA	NA	NA	NA	NA	NA	NA	NA	NA	NA	NA	NA	NA	6.50619	0.0117637	4.2494e-06	NA	NA	NA
cg03562044	NA	NA	NA	NA	NA	NA	NA	NA	NA	NA	NA	NA	NA	NA	NA	NA	NA	NA	NA	NA	NA	NA	NA	NA	3.79625	0.00438808	0.000321471	NA	NA	NA	NA	NA	NA
cg03576234	NA	NA	NA	NA	NA	NA	NA	NA	NA	NA	NA	NA	NA	NA	NA	NA	NA	NA	NA	NA	NA	NA	NA	NA	5.03162	0.0437798	8.70172e-06	NA	NA	NA	NA	NA	NA
cg03609666	NA	NA	NA	NA	NA	NA	NA	NA	NA	NA	NA	NA	NA	NA	NA	NA	NA	NA	NA	NA	NA	NA	NA	NA	3.67274	0.00609619	0.000456261	NA	NA	NA	NA	NA	NA
cg03638479	NA	NA	NA	NA	NA	NA	NA	NA	NA	NA	NA	NA	NA	NA	NA	NA	NA	NA	NA	NA	NA	NA	NA	NA	3.5679	0.0135905	0.000612905	NA	NA	NA	NA	NA	NA
cg03668718	5.31723	0.039178	7.63468e-06	NA	NA	NA	NA	NA	NA	NA	NA	NA	NA	NA	NA	NA	NA	NA	NA	NA	NA	NA	NA	NA	4.92672	0.0285093	1.18883e-05	NA	NA	NA	NA	NA	NA
cg03669282	4.10294	0.0376814	0.000252573	NA	NA	NA	NA	NA	NA	NA	NA	NA	NA	NA	NA	NA	NA	NA	NA	NA	NA	NA	NA	NA	NA	NA	NA	NA	NA	NA	NA	NA	NA
cg03727240	4.28194	0.0340756	0.000152505	NA	NA	NA	NA	NA	NA	NA	NA	NA	NA	NA	NA	NA	NA	NA	NA	NA	NA	NA	NA	NA	3.73558	0.0440373	0.000381928	NA	NA	NA	NA	NA	NA
cg03733207	NA	NA	NA	NA	NA	NA	NA	NA	NA	NA	NA	NA	NA	NA	NA	NA	NA	NA	NA	NA	NA	NA	NA	NA	3.70816	0.013065	0.000412778	NA	NA	NA	NA	NA	NA
cg03749154	-4.14684	0.030456	0.000223281	NA	NA	NA	NA	NA	NA	NA	NA	NA	NA	NA	NA	NA	NA	NA	NA	NA	NA	NA	NA	NA	NA	NA	NA	NA	NA	NA	NA	NA	NA
cg03761750	5.06104	0.0259839	1.61723e-05	NA	NA	NA	NA	NA	NA	NA	NA	NA	NA	NA	NA	NA	NA	NA	NA	NA	NA	NA	NA	NA	NA	NA	NA	NA	NA	NA	NA	NA	NA
cg03816029	NA	NA	NA	NA	NA	NA	NA	NA	NA	NA	NA	NA	NA	NA	NA	NA	NA	NA	NA	NA	NA	NA	NA	NA	4.09012	0.0235867	0.0001384	NA	NA	NA	NA	NA	NA
cg03819692	NA	NA	NA	NA	NA	NA	NA	NA	NA	NA	NA	NA	NA	NA	NA	NA	NA	NA	NA	NA	NA	NA	NA	NA	4.29424	0.0407358	7.65482e-05	NA	NA	NA	NA	NA	NA
cg03846951	NA	NA	NA	NA	NA	NA	NA	NA	NA	NA	NA	NA	NA	NA	NA	NA	NA	NA	NA	NA	NA	NA	NA	NA	3.86026	0.0288354	0.00026785	NA	NA	NA	NA	NA	NA
cg03851159	NA	NA	NA	NA	NA	NA	NA	NA	NA	NA	NA	NA	NA	NA	NA	NA	NA	NA	NA	NA	NA	NA	NA	NA	4.81776	0.00371664	1.64251e-05	NA	NA	NA	NA	NA	NA
cg03866192	NA	NA	NA	NA	NA	NA	NA	NA	NA	NA	NA	NA	NA	NA	NA	NA	NA	NA	NA	NA	NA	NA	NA	NA	3.70495	0.0300517	0.000416548	NA	NA	NA	NA	NA	NA
cg03883228	NA	NA	NA	NA	NA	NA	NA	NA	NA	NA	NA	NA	NA	NA	NA	NA	NA	NA	NA	NA	NA	NA	NA	NA	3.95764	0.0405922	0.000202679	NA	NA	NA	NA	NA	NA
cg03989125	NA	NA	NA	NA	NA	NA	NA	NA	NA	NA	NA	NA	NA	NA	NA	NA	NA	NA	NA	NA	NA	NA	NA	NA	4.52376	0.0201755	3.91084e-05	NA	NA	NA	NA	NA	NA
cg04003500	4.59146	0.0136859	6.30565e-05	NA	NA	NA	NA	NA	NA	NA	NA	NA	NA	NA	NA	NA	NA	NA	NA	NA	NA	NA	NA	NA	4.02029	0.00716837	0.000169276	NA	NA	NA	NA	NA	NA
cg04031507	NA	NA	NA	NA	NA	NA	NA	NA	NA	NA	NA	NA	NA	NA	NA	NA	NA	NA	NA	NA	NA	NA	NA	NA	3.61341	0.0269871	0.000539327	NA	NA	NA	NA	NA	NA
cg04055142	NA	NA	NA	NA	NA	NA	NA	NA	NA	NA	NA	NA	NA	NA	NA	NA	NA	NA	NA	NA	NA	NA	NA	NA	3.80054	0.0151904	0.00031757	NA	NA	NA	NA	NA	NA
cg04096619	NA	NA	NA	NA	NA	NA	NA	NA	NA	NA	NA	NA	NA	NA	NA	NA	NA	NA	NA	NA	NA	NA	NA	NA	4.31827	0.0131327	7.13681e-05	NA	NA	NA	NA	NA	NA
cg04108939	4.44226	0.0114339	9.6672e-05	NA	NA	NA	NA	NA	NA	NA	NA	NA	NA	NA	NA	NA	NA	NA	NA	NA	NA	NA	NA	NA	NA	NA	NA	NA	NA	NA	NA	NA	NA
cg04109923	5.13406	0.0230631	1.30644e-05	NA	NA	NA	NA	NA	NA	NA	NA	NA	NA	NA	NA	NA	NA	NA	NA	NA	NA	NA	NA	NA	4.25398	0.00999865	8.60657e-05	NA	NA	NA	NA	NA	NA
cg04139007	4.15385	0.0392734	0.000218923	NA	NA	NA	NA	NA	NA	NA	NA	NA	NA	NA	NA	NA	NA	NA	NA	NA	NA	NA	NA	NA	NA	NA	NA	NA	NA	NA	NA	NA	NA
cg04180299	NA	NA	NA	NA	NA	NA	NA	NA	NA	NA	NA	NA	NA	NA	NA	NA	NA	NA	NA	NA	NA	NA	NA	NA	3.70236	0.0135621	0.000419614	NA	NA	NA	NA	NA	NA
cg04195548	5.41564	0.0363316	5.71509e-06	NA	NA	NA	NA	NA	NA	NA	NA	NA	NA	NA	NA	NA	NA	NA	NA	NA	NA	NA	NA	NA	5.12487	0.0382395	6.58993e-06	NA	NA	NA	NA	NA	NA
cg04203238	4.76733	0.0484292	3.79785e-05	NA	NA	NA	NA	NA	NA	NA	NA	NA	NA	NA	NA	NA	NA	NA	NA	NA	NA	NA	NA	NA	3.59905	0.0283647	0.000561562	NA	NA	NA	NA	NA	NA
cg04228935	4.51475	0.0465042	7.85753e-05	NA	NA	NA	NA	NA	NA	NA	NA	NA	NA	NA	NA	NA	NA	NA	NA	NA	NA	NA	NA	NA	NA	NA	NA	NA	NA	NA	NA	NA	NA
cg04285033	6.2292	0.0417704	5.11399e-07	NA	NA	NA	NA	NA	NA	NA	NA	NA	NA	NA	NA	NA	NA	NA	NA	NA	NA	NA	NA	NA	6.31918	0.01183	1.8093e-07	NA	NA	NA	NA	NA	NA
cg04355968	NA	NA	NA	NA	NA	NA	NA	NA	NA	NA	NA	NA	NA	NA	NA	NA	NA	NA	NA	NA	NA	NA	NA	NA	4.74	0.0492296	2.06761e-05	NA	NA	NA	NA	NA	NA
cg04367486	NA	NA	NA	NA	NA	NA	NA	NA	NA	NA	NA	NA	NA	NA	NA	NA	NA	NA	NA	NA	NA	NA	NA	NA	4.18976	0.00706714	0.000103718	NA	NA	NA	NA	NA	NA
cg04411841	NA	NA	NA	NA	NA	NA	NA	NA	NA	NA	NA	NA	NA	NA	NA	NA	NA	NA	NA	NA	NA	NA	NA	NA	3.63708	0.0153705	0.000504562	NA	NA	NA	NA	NA	NA
cg04425614	4.80208	0.0413087	3.43449e-05	NA	NA	NA	NA	NA	NA	NA	NA	NA	NA	NA	NA	NA	NA	NA	NA	NA	NA	NA	NA	NA	4.67578	0.036759	2.49953e-05	NA	NA	NA	NA	NA	NA
cg04488822	NA	NA	NA	NA	NA	NA	NA	NA	NA	NA	NA	NA	NA	NA	NA	NA	NA	NA	NA	NA	NA	NA	NA	NA	4.05867	0.0337584	0.000151551	NA	NA	NA	NA	NA	NA
cg04493430	NA	NA	NA	NA	NA	NA	NA	NA	NA	NA	NA	NA	NA	NA	NA	NA	NA	NA	NA	NA	NA	NA	NA	NA	4.23129	0.0293727	9.19365e-05	NA	NA	NA	NA	NA	NA
cg04528771	NA	NA	NA	NA	NA	NA	NA	NA	NA	NA	NA	NA	NA	NA	NA	NA	NA	NA	NA	NA	NA	NA	NA	NA	3.57341	0.0159191	0.000603504	NA	NA	NA	NA	NA	NA
cg04540442	4.21845	0.0260634	0.00018249	NA	NA	NA	NA	NA	NA	NA	NA	NA	NA	NA	NA	NA	NA	NA	NA	NA	NA	NA	NA	NA	NA	NA	NA	NA	NA	NA	NA	NA	NA
cg04548096	NA	NA	NA	NA	NA	NA	NA	NA	NA	NA	NA	NA	NA	NA	NA	NA	NA	NA	NA	NA	NA	NA	NA	NA	4.22145	0.00967635	9.46028e-05	NA	NA	NA	NA	NA	NA
cg04557452	NA	NA	NA	NA	NA	NA	7.14932	0.0369059	9.45396e-07	NA	NA	NA	NA	NA	NA	NA	NA	NA	NA	NA	NA	NA	NA	NA	NA	NA	NA	5.72726	0.0132029	2.60351e-05	NA	NA	NA
cg04579254	-4.64715	0.0331865	5.37247e-05	NA	NA	NA	NA	NA	NA	NA	NA	NA	NA	NA	NA	NA	NA	NA	NA	NA	NA	NA	NA	NA	NA	NA	NA	NA	NA	NA	NA	NA	NA
cg04588356	4.25494	0.0187396	0.000164613	NA	NA	NA	NA	NA	NA	NA	NA	NA	NA	NA	NA	NA	NA	NA	NA	NA	NA	NA	NA	NA	NA	NA	NA	NA	NA	NA	NA	NA	NA
cg04691908	4.23089	0.0121985	0.00017619	NA	NA	NA	NA	NA	NA	NA	NA	NA	NA	NA	NA	NA	NA	NA	NA	NA	NA	NA	NA	NA	4.09265	0.00972334	0.000137391	NA	NA	NA	NA	NA	NA
cg04754315	4.09567	0.026991	0.000257776	NA	NA	NA	NA	NA	NA	NA	NA	NA	NA	NA	NA	NA	NA	NA	NA	NA	NA	NA	NA	NA	NA	NA	NA	NA	NA	NA	NA	NA	NA
cg04787024	4.24591	0.0177509	0.000168871	NA	NA	NA	NA	NA	NA	NA	NA	NA	NA	NA	NA	NA	NA	NA	NA	NA	NA	NA	NA	NA	3.76893	0.0081399	0.000347437	NA	NA	NA	NA	NA	NA
cg04788987	NA	NA	NA	NA	NA	NA	NA	NA	NA	NA	NA	NA	NA	NA	NA	NA	NA	NA	NA	NA	NA	NA	NA	NA	4.08259	0.0184454	0.000141441	NA	NA	NA	NA	NA	NA
cg04803507	4.50334	0.0249112	8.11855e-05	NA	NA	NA	NA	NA	NA	NA	NA	NA	NA	NA	NA	NA	NA	NA	NA	NA	NA	NA	NA	NA	3.91329	0.0458955	0.000230158	NA	NA	NA	NA	NA	NA
cg04818331	NA	NA	NA	NA	NA	NA	NA	NA	NA	NA	NA	NA	NA	NA	NA	NA	NA	NA	NA	NA	NA	NA	NA	NA	3.57303	0.0356087	0.000604134	NA	NA	NA	NA	NA	NA
cg04854089	NA	NA	NA	NA	NA	NA	NA	NA	NA	NA	NA	NA	NA	NA	NA	NA	NA	NA	NA	NA	NA	NA	NA	NA	3.56626	0.0273649	0.000615729	NA	NA	NA	NA	NA	NA
cg04885832	NA	NA	NA	NA	NA	NA	NA	NA	NA	NA	NA	NA	NA	NA	NA	NA	NA	NA	NA	NA	NA	NA	NA	NA	4.23468	0.0240019	9.10334e-05	NA	NA	NA	NA	NA	NA
cg04889072	NA	NA	NA	NA	NA	NA	NA	NA	NA	NA	NA	NA	NA	NA	NA	NA	NA	NA	NA	NA	NA	NA	NA	NA	3.66632	0.030859	0.000464609	NA	NA	NA	NA	NA	NA
cg04918402	4.32585	0.0174935	0.00013465	NA	NA	NA	NA	NA	NA	NA	NA	NA	NA	NA	NA	NA	NA	NA	NA	NA	NA	NA	NA	NA	3.66409	0.0299299	0.000467544	NA	NA	NA	NA	NA	NA
cg04927069	5.0902	0.0493673	1.48519e-05	NA	NA	NA	NA	NA	NA	NA	NA	NA	NA	NA	NA	NA	NA	NA	NA	NA	NA	NA	NA	NA	5.92548	0.0333904	5.95132e-07	NA	NA	NA	NA	NA	NA
cg04932840	NA	NA	NA	NA	NA	NA	NA	NA	NA	NA	NA	NA	NA	NA	NA	NA	NA	NA	NA	NA	NA	NA	NA	NA	3.71433	0.0356837	0.000405626	NA	NA	NA	NA	NA	NA
cg04947555	NA	NA	NA	NA	NA	NA	NA	NA	NA	NA	NA	NA	NA	NA	NA	NA	NA	NA	NA	NA	NA	NA	NA	NA	3.84171	0.0192864	0.000282411	NA	NA	NA	NA	NA	NA
cg04992638	NA	NA	NA	NA	NA	NA	NA	NA	NA	NA	NA	NA	NA	NA	NA	NA	NA	NA	NA	NA	NA	NA	NA	NA	3.68067	0.0125093	0.000446157	NA	NA	NA	NA	NA	NA
cg04994795	5.29719	0.0348419	8.09784e-06	NA	NA	NA	NA	NA	NA	NA	NA	NA	NA	NA	NA	NA	NA	NA	NA	NA	NA	NA	NA	NA	5.43716	0.0330704	2.58833e-06	NA	NA	NA	NA	NA	NA
cg05004973	4.55329	0.0142946	7.03592e-05	NA	NA	NA	NA	NA	NA	NA	NA	NA	NA	NA	NA	NA	NA	NA	NA	NA	NA	NA	NA	NA	4.29438	0.00822814	7.65158e-05	NA	NA	NA	NA	NA	NA
cg05018835	NA	NA	NA	NA	NA	NA	NA	NA	NA	NA	NA	NA	NA	NA	NA	NA	NA	NA	NA	NA	NA	NA	NA	NA	3.66264	0.0252622	0.000469455	NA	NA	NA	NA	NA	NA
cg05049329	5.56449	0.0169022	3.68382e-06	NA	NA	NA	NA	NA	NA	NA	NA	NA	NA	NA	NA	NA	NA	NA	NA	NA	NA	NA	NA	NA	NA	NA	NA	NA	NA	NA	NA	NA	NA
cg05091570	5.11269	0.0176048	1.3907e-05	NA	NA	NA	NA	NA	NA	NA	NA	NA	NA	NA	NA	NA	NA	NA	NA	NA	NA	NA	NA	NA	4.44969	0.016094	4.86021e-05	NA	NA	NA	NA	NA	NA
cg05099508	4.37398	0.0291672	0.000117437	NA	NA	NA	NA	NA	NA	NA	NA	NA	NA	NA	NA	NA	NA	NA	NA	NA	NA	NA	NA	NA	NA	NA	NA	NA	NA	NA	NA	NA	NA
cg05130115	4.33467	0.00660474	0.000131322	NA	NA	NA	NA	NA	NA	NA	NA	NA	NA	NA	NA	NA	NA	NA	NA	NA	NA	NA	NA	NA	4.36793	0.0479014	6.17383e-05	NA	NA	NA	NA	NA	NA
cg05142358	NA	NA	NA	NA	NA	NA	NA	NA	NA	NA	NA	NA	NA	NA	NA	NA	NA	NA	NA	NA	NA	NA	NA	NA	4.51337	0.0412275	4.03198e-05	NA	NA	NA	NA	NA	NA
cg05163496	NA	NA	NA	NA	NA	NA	NA	NA	NA	NA	NA	NA	NA	NA	NA	NA	NA	NA	NA	NA	NA	NA	NA	NA	4.52778	0.030296	3.86493e-05	NA	NA	NA	NA	NA	NA
cg05165378	NA	NA	NA	NA	NA	NA	NA	NA	NA	NA	NA	NA	NA	NA	NA	NA	NA	NA	NA	NA	NA	NA	NA	NA	4.21567	0.0459439	9.62035e-05	NA	NA	NA	NA	NA	NA
cg05169846	NA	NA	NA	NA	NA	NA	NA	NA	NA	NA	NA	NA	NA	NA	NA	NA	NA	NA	NA	NA	NA	NA	NA	NA	4.25811	0.0205167	8.50387e-05	NA	NA	NA	NA	NA	NA
cg05297854	4.52296	0.0225517	7.67501e-05	NA	NA	NA	NA	NA	NA	NA	NA	NA	NA	NA	NA	NA	NA	NA	NA	NA	NA	NA	NA	NA	4.04597	0.016015	0.000157203	NA	NA	NA	NA	NA	NA
cg05304177	4.55866	0.0271135	6.92822e-05	NA	NA	NA	NA	NA	NA	NA	NA	NA	NA	NA	NA	NA	NA	NA	NA	NA	NA	NA	NA	NA	NA	NA	NA	NA	NA	NA	NA	NA	NA
cg05339695	NA	NA	NA	NA	NA	NA	NA	NA	NA	NA	NA	NA	NA	NA	NA	NA	NA	NA	NA	NA	NA	NA	NA	NA	3.76309	0.0385592	0.000353244	NA	NA	NA	NA	NA	NA
cg05361373	NA	NA	NA	NA	NA	NA	NA	NA	NA	NA	NA	NA	NA	NA	NA	NA	NA	NA	NA	NA	NA	NA	NA	NA	3.7544	0.0350259	0.000362071	NA	NA	NA	NA	NA	NA
cg05391892	NA	NA	NA	NA	NA	NA	NA	NA	NA	NA	NA	NA	NA	NA	NA	NA	NA	NA	NA	NA	NA	NA	NA	NA	3.83459	0.0295663	0.00028821	NA	NA	NA	NA	NA	NA
cg05452524	NA	NA	NA	NA	NA	NA	NA	NA	NA	NA	NA	NA	NA	NA	NA	NA	NA	NA	NA	NA	NA	NA	NA	NA	3.72006	0.040179	0.000399096	NA	NA	NA	NA	NA	NA
cg05461270	4.49352	0.0204851	8.34981e-05	NA	NA	NA	NA	NA	NA	NA	NA	NA	NA	NA	NA	NA	NA	NA	NA	NA	NA	NA	NA	NA	4.55747	0.0109421	3.54188e-05	NA	NA	NA	NA	NA	NA
cg05514903	4.23327	0.0424327	0.00017501	NA	NA	NA	NA	NA	NA	NA	NA	NA	NA	NA	NA	NA	NA	NA	NA	NA	NA	NA	NA	NA	NA	NA	NA	NA	NA	NA	NA	NA	NA
cg05516499	NA	NA	NA	NA	NA	NA	6.0132	0.00446243	1.34026e-05	NA	NA	NA	NA	NA	NA	NA	NA	NA	NA	NA	NA	NA	NA	NA	NA	NA	NA	NA	NA	NA	NA	NA	NA
cg05602356	NA	NA	NA	NA	NA	NA	NA	NA	NA	NA	NA	NA	NA	NA	NA	NA	NA	NA	NA	NA	NA	NA	NA	NA	4.02085	0.0473527	0.000169004	NA	NA	NA	NA	NA	NA
cg05603292	NA	NA	NA	NA	NA	NA	NA	NA	NA	NA	NA	NA	NA	NA	NA	NA	NA	NA	NA	NA	NA	NA	NA	NA	4.27494	0.0478495	8.09743e-05	NA	NA	NA	NA	NA	NA
cg05608541	NA	NA	NA	NA	NA	NA	NA	NA	NA	NA	NA	NA	NA	NA	NA	NA	NA	NA	NA	NA	NA	NA	NA	NA	3.9066	0.0178978	0.000234615	NA	NA	NA	NA	NA	NA
cg05624478	4.12505	0.0185558	0.000237381	NA	NA	NA	NA	NA	NA	NA	NA	NA	NA	NA	NA	NA	NA	NA	NA	NA	NA	NA	NA	NA	3.91579	0.0245617	0.000228517	NA	NA	NA	NA	NA	NA
cg05654361	NA	NA	NA	NA	NA	NA	NA	NA	NA	NA	NA	NA	NA	NA	NA	NA	NA	NA	NA	NA	NA	NA	NA	NA	NA	NA	NA	6.22507	0.0302341	8.18483e-06	NA	NA	NA
cg05668613	NA	NA	NA	NA	NA	NA	NA	NA	NA	NA	NA	NA	NA	NA	NA	NA	NA	NA	NA	NA	NA	NA	NA	NA	3.6472	0.00858498	0.000490368	NA	NA	NA	NA	NA	NA
cg05690644	5.37539	0.0416124	6.43422e-06	NA	NA	NA	NA	NA	NA	NA	NA	NA	NA	NA	NA	NA	NA	NA	NA	NA	NA	NA	NA	NA	4.68342	0.00658006	2.4438e-05	NA	NA	NA	NA	NA	NA
cg05707714	NA	NA	NA	NA	NA	NA	NA	NA	NA	NA	NA	NA	NA	NA	NA	NA	NA	NA	NA	NA	NA	NA	NA	NA	3.62518	0.0168451	0.000521753	NA	NA	NA	NA	NA	NA
cg05716724	NA	NA	NA	NA	NA	NA	NA	NA	NA	NA	NA	NA	NA	NA	NA	NA	NA	NA	NA	NA	NA	NA	NA	NA	5.79472	0.0268741	8.82946e-07	NA	NA	NA	NA	NA	NA
cg05798147	4.27057	0.021071	0.000157491	NA	NA	NA	NA	NA	NA	NA	NA	NA	NA	NA	NA	NA	NA	NA	NA	NA	NA	NA	NA	NA	NA	NA	NA	NA	NA	NA	NA	NA	NA
cg05810170	NA	NA	NA	NA	NA	NA	NA	NA	NA	NA	NA	NA	NA	NA	NA	NA	NA	NA	NA	NA	NA	NA	NA	NA	4.16284	0.0282629	0.00011214	NA	NA	NA	NA	NA	NA
cg05836184	NA	NA	NA	NA	NA	NA	5.80052	0.00234984	2.19667e-05	NA	NA	NA	NA	NA	NA	NA	NA	NA	NA	NA	NA	NA	NA	NA	NA	NA	NA	NA	NA	NA	NA	NA	NA
cg05842348	NA	NA	NA	NA	NA	NA	NA	NA	NA	NA	NA	NA	NA	NA	NA	NA	NA	NA	NA	NA	NA	NA	NA	NA	3.70229	0.0465846	0.000419693	NA	NA	NA	NA	NA	NA
cg05845592	NA	NA	NA	NA	NA	NA	NA	NA	NA	NA	NA	NA	NA	NA	NA	NA	NA	NA	NA	NA	NA	NA	NA	NA	5.03997	0.0224742	8.48793e-06	NA	NA	NA	NA	NA	NA
cg05847784	4.83839	0.0223515	3.09149e-05	NA	NA	NA	NA	NA	NA	NA	NA	NA	NA	NA	NA	NA	NA	NA	NA	NA	NA	NA	NA	NA	4.74861	0.0420604	2.01564e-05	NA	NA	NA	NA	NA	NA
cg05861664	NA	NA	NA	NA	NA	NA	NA	NA	NA	NA	NA	NA	NA	NA	NA	NA	NA	NA	NA	NA	NA	NA	NA	NA	3.75748	0.00176755	0.000358915	NA	NA	NA	NA	NA	NA
cg05907260	NA	NA	NA	NA	NA	NA	NA	NA	NA	NA	NA	NA	NA	NA	NA	NA	NA	NA	NA	NA	NA	NA	NA	NA	4.31601	0.0385169	7.18409e-05	NA	NA	NA	NA	NA	NA
cg05907933	NA	NA	NA	NA	NA	NA	NA	NA	NA	NA	NA	NA	NA	NA	NA	NA	NA	NA	NA	NA	NA	NA	NA	NA	3.57129	0.00942348	0.000607089	NA	NA	NA	NA	NA	NA
cg05924212	NA	NA	NA	NA	NA	NA	NA	NA	NA	NA	NA	NA	NA	NA	NA	NA	NA	NA	NA	NA	NA	NA	NA	NA	3.61363	0.0309418	0.000539002	NA	NA	NA	NA	NA	NA
cg05940703	NA	NA	NA	NA	NA	NA	NA	NA	NA	NA	NA	NA	NA	NA	NA	NA	NA	NA	NA	NA	NA	NA	NA	NA	5.7	0.0446346	1.17456e-06	NA	NA	NA	NA	NA	NA
cg05956452	4.80884	0.0273579	3.36785e-05	NA	NA	NA	NA	NA	NA	NA	NA	NA	NA	NA	NA	NA	NA	NA	NA	NA	NA	NA	NA	NA	NA	NA	NA	NA	NA	NA	NA	NA	NA
cg05965392	NA	NA	NA	NA	NA	NA	NA	NA	NA	NA	NA	NA	NA	NA	NA	NA	NA	NA	NA	NA	NA	NA	NA	NA	4.63334	0.00988053	2.83283e-05	NA	NA	NA	NA	NA	NA
cg05975654	4.68181	0.0332427	4.86174e-05	NA	NA	NA	NA	NA	NA	NA	NA	NA	NA	NA	NA	NA	NA	NA	NA	NA	NA	NA	NA	NA	4.6455	0.0460341	2.73312e-05	NA	NA	NA	NA	NA	NA
cg05979232	NA	NA	NA	NA	NA	NA	NA	NA	NA	NA	NA	NA	NA	NA	NA	NA	NA	NA	NA	NA	NA	NA	NA	NA	3.87393	0.0438643	0.000257593	NA	NA	NA	NA	NA	NA
cg05979457	4.3453	0.0136902	0.000127414	NA	NA	NA	NA	NA	NA	NA	NA	NA	NA	NA	NA	NA	NA	NA	NA	NA	NA	NA	NA	NA	3.67654	0.0105976	0.000451391	NA	NA	NA	NA	NA	NA
cg05988267	NA	NA	NA	NA	NA	NA	NA	NA	NA	NA	NA	NA	NA	NA	NA	NA	NA	NA	NA	NA	NA	NA	NA	NA	3.7161	0.0299309	0.000403599	NA	NA	NA	NA	NA	NA
cg06043315	NA	NA	NA	NA	NA	NA	NA	NA	NA	NA	NA	NA	NA	NA	NA	NA	NA	NA	NA	NA	NA	NA	NA	NA	3.93053	0.026853	0.000219065	NA	NA	NA	NA	NA	NA
cg06100368	NA	NA	NA	NA	NA	NA	NA	NA	NA	NA	NA	NA	NA	NA	NA	NA	NA	NA	NA	NA	NA	NA	NA	NA	5.03935	0.044172	8.50361e-06	NA	NA	NA	NA	NA	NA
cg06111454	4.79122	0.0144872	3.54421e-05	NA	NA	NA	NA	NA	NA	NA	NA	NA	NA	NA	NA	NA	NA	NA	NA	NA	NA	NA	NA	NA	4.96763	0.0149637	1.05269e-05	NA	NA	NA	NA	NA	NA
cg06114334	NA	NA	NA	NA	NA	NA	NA	NA	NA	NA	NA	NA	NA	NA	NA	NA	NA	NA	NA	NA	NA	NA	NA	NA	3.94773	0.0349818	0.000208527	NA	NA	NA	NA	NA	NA
cg06142946	NA	NA	NA	NA	NA	NA	NA	NA	NA	NA	NA	NA	NA	NA	NA	NA	NA	NA	NA	NA	NA	NA	NA	NA	4.92545	0.0284653	1.19331e-05	NA	NA	NA	NA	NA	NA
cg06166809	4.37646	0.0451264	0.000116612	NA	NA	NA	NA	NA	NA	NA	NA	NA	NA	NA	NA	NA	NA	NA	NA	NA	NA	NA	NA	NA	4.36173	0.0324037	6.28659e-05	NA	NA	NA	NA	NA	NA
cg06186698	NA	NA	NA	NA	NA	NA	NA	NA	NA	NA	NA	NA	NA	NA	NA	NA	NA	NA	NA	NA	NA	NA	NA	NA	4.87003	0.0211217	1.40672e-05	NA	NA	NA	NA	NA	NA
cg06208130	-5.0875	0.0163013	1.49697e-05	NA	NA	NA	NA	NA	NA	NA	NA	NA	NA	NA	NA	NA	NA	NA	NA	NA	NA	NA	NA	NA	NA	NA	NA	NA	NA	NA	NA	NA	NA
cg06211837	NA	NA	NA	NA	NA	NA	NA	NA	NA	NA	NA	NA	NA	NA	NA	NA	NA	NA	NA	NA	NA	NA	NA	NA	3.72585	0.0328611	0.000392604	NA	NA	NA	NA	NA	NA
cg06214869	5.11972	0.0140978	1.3624e-05	NA	NA	NA	NA	NA	NA	NA	NA	NA	NA	NA	NA	NA	NA	NA	NA	NA	NA	NA	NA	NA	5.2413	0.0453265	4.65402e-06	NA	NA	NA	NA	NA	NA
cg06220235	NA	NA	NA	NA	NA	NA	NA	NA	NA	NA	NA	NA	NA	NA	NA	NA	NA	NA	NA	NA	NA	NA	NA	NA	4.65506	0.0109846	2.65714e-05	NA	NA	NA	NA	NA	NA
cg06221393	4.27199	0.0040866	0.000156858	NA	NA	NA	NA	NA	NA	NA	NA	NA	NA	NA	NA	NA	NA	NA	NA	NA	NA	NA	NA	NA	NA	NA	NA	NA	NA	NA	NA	NA	NA
cg06235390	NA	NA	NA	NA	NA	NA	NA	NA	NA	NA	NA	NA	NA	NA	NA	NA	NA	NA	NA	NA	NA	NA	NA	NA	3.9671	0.0068221	0.000197246	NA	NA	NA	NA	NA	NA
cg06261066	NA	NA	NA	NA	NA	NA	NA	NA	NA	NA	NA	NA	NA	NA	NA	NA	NA	NA	NA	NA	NA	NA	NA	NA	3.7836	0.0391867	0.000333241	NA	NA	NA	NA	NA	NA
cg06270993	NA	NA	NA	NA	NA	NA	NA	NA	NA	NA	NA	NA	NA	NA	NA	NA	NA	NA	NA	NA	NA	NA	NA	NA	3.92456	0.0351354	0.000222847	NA	NA	NA	NA	NA	NA
cg06291111	NA	NA	NA	NA	NA	NA	NA	NA	NA	NA	NA	NA	NA	NA	NA	NA	NA	NA	NA	NA	NA	NA	NA	NA	4.06605	0.0190165	0.000148358	5.78203	0.0336824	2.29293e-05	NA	NA	NA
cg06322601	4.12509	0.0245702	0.000237349	NA	NA	NA	NA	NA	NA	NA	NA	NA	NA	NA	NA	NA	NA	NA	NA	NA	NA	NA	NA	NA	NA	NA	NA	NA	NA	NA	NA	NA	NA
cg06350432	5.8651	0.0458709	1.5119e-06	NA	NA	NA	7.13195	0.0391108	9.84588e-07	NA	NA	NA	NA	NA	NA	NA	NA	NA	NA	NA	NA	NA	NA	NA	5.20133	0.0367147	5.24469e-06	6.41795	0.0351523	5.22074e-06	NA	NA	NA
cg06357561	5.07061	0.0246607	1.57267e-05	NA	NA	NA	NA	NA	NA	NA	NA	NA	NA	NA	NA	NA	NA	NA	NA	NA	NA	NA	NA	NA	NA	NA	NA	NA	NA	NA	NA	NA	NA
cg06371502	NA	NA	NA	NA	NA	NA	NA	NA	NA	NA	NA	NA	NA	NA	NA	NA	NA	NA	NA	NA	NA	NA	NA	NA	NA	NA	NA	6.22348	0.029266	8.21515e-06	NA	NA	NA
cg06389019	5.46514	0.0236016	4.93939e-06	NA	NA	NA	NA	NA	NA	NA	NA	NA	NA	NA	NA	NA	NA	NA	NA	NA	NA	NA	NA	NA	NA	NA	NA	NA	NA	NA	NA	NA	NA
cg06404175	4.93149	0.0134889	2.35906e-05	NA	NA	NA	NA	NA	NA	NA	NA	NA	NA	NA	NA	NA	NA	NA	NA	NA	NA	NA	NA	NA	NA	NA	NA	NA	NA	NA	NA	NA	NA
cg06427867	4.20468	0.0239096	0.000189722	NA	NA	NA	NA	NA	NA	NA	NA	NA	NA	NA	NA	NA	NA	NA	NA	NA	NA	NA	NA	NA	4.05045	0.0258683	0.000155187	NA	NA	NA	NA	NA	NA
cg06470626	4.29519	0.0376166	0.000146885	NA	NA	NA	NA	NA	NA	NA	NA	NA	NA	NA	NA	NA	NA	NA	NA	NA	NA	NA	NA	NA	NA	NA	NA	NA	NA	NA	NA	NA	NA
cg06565604	NA	NA	NA	NA	NA	NA	NA	NA	NA	NA	NA	NA	NA	NA	NA	NA	NA	NA	NA	NA	NA	NA	NA	NA	4.27613	0.0222163	8.06934e-05	NA	NA	NA	NA	NA	NA
cg06598196	NA	NA	NA	NA	NA	NA	NA	NA	NA	NA	NA	NA	NA	NA	NA	NA	NA	NA	NA	NA	NA	NA	NA	NA	3.77412	0.00580965	0.000342344	NA	NA	NA	NA	NA	NA
cg06598544	NA	NA	NA	NA	NA	NA	7.20359	0.0104419	8.32672e-07	NA	NA	NA	NA	NA	NA	NA	NA	NA	NA	NA	NA	NA	NA	NA	NA	NA	NA	NA	NA	NA	NA	NA	NA
cg06618298	NA	NA	NA	NA	NA	NA	NA	NA	NA	NA	NA	NA	NA	NA	NA	NA	NA	NA	NA	NA	NA	NA	NA	NA	3.80884	0.0222802	0.00031015	NA	NA	NA	NA	NA	NA
cg06642177	NA	NA	NA	NA	NA	NA	NA	NA	NA	NA	NA	NA	NA	NA	NA	NA	NA	NA	NA	NA	NA	NA	NA	NA	5.25263	0.0489592	4.49896e-06	NA	NA	NA	NA	NA	NA
cg06706670	5.29863	0.0290717	8.0636e-06	NA	NA	NA	NA	NA	NA	NA	NA	NA	NA	NA	NA	NA	NA	NA	NA	NA	NA	NA	NA	NA	4.45724	0.0169266	4.75388e-05	NA	NA	NA	NA	NA	NA
cg06709756	NA	NA	NA	NA	NA	NA	NA	NA	NA	NA	NA	NA	NA	NA	NA	NA	NA	NA	NA	NA	NA	NA	NA	NA	3.65537	0.0484767	0.000479189	NA	NA	NA	NA	NA	NA
cg06721528	4.43056	0.0340787	9.99528e-05	NA	NA	NA	NA	NA	NA	NA	NA	NA	NA	NA	NA	NA	NA	NA	NA	NA	NA	NA	NA	NA	NA	NA	NA	NA	NA	NA	NA	NA	NA
cg06744740	-4.82115	0.0390722	3.24989e-05	NA	NA	NA	NA	NA	NA	NA	NA	NA	NA	NA	NA	NA	NA	NA	NA	NA	NA	NA	NA	NA	NA	NA	NA	NA	NA	NA	NA	NA	NA
cg06776703	4.8103	0.0123881	3.35365e-05	NA	NA	NA	NA	NA	NA	NA	NA	NA	NA	NA	NA	NA	NA	NA	NA	NA	NA	NA	NA	NA	4.5893	0.00754351	3.22527e-05	NA	NA	NA	NA	NA	NA
cg06820302	5.00296	0.0141089	1.91585e-05	NA	NA	NA	NA	NA	NA	NA	NA	NA	NA	NA	NA	NA	NA	NA	NA	NA	NA	NA	NA	NA	4.60019	0.0138152	3.1235e-05	NA	NA	NA	NA	NA	NA
cg06821120	4.10028	0.0171284	0.000254462	NA	NA	NA	NA	NA	NA	NA	NA	NA	NA	NA	NA	NA	NA	NA	NA	NA	NA	NA	NA	NA	4.66348	0.00808009	2.5919e-05	NA	NA	NA	NA	NA	NA
cg06822952	4.32066	0.00587764	0.000136648	NA	NA	NA	NA	NA	NA	NA	NA	NA	NA	NA	NA	NA	NA	NA	NA	NA	NA	NA	NA	NA	4.22961	0.0103871	9.23869e-05	NA	NA	NA	NA	NA	NA
cg06830441	4.50931	0.040585	7.98085e-05	NA	NA	NA	NA	NA	NA	NA	NA	NA	NA	NA	NA	NA	NA	NA	NA	NA	NA	NA	NA	NA	NA	NA	NA	NA	NA	NA	NA	NA	NA
cg06837311	NA	NA	NA	NA	NA	NA	NA	NA	NA	NA	NA	NA	NA	NA	NA	NA	NA	NA	NA	NA	NA	NA	NA	NA	4.08401	0.0192274	0.000140861	NA	NA	NA	NA	NA	NA
cg06843889	5.78387	0.0260907	1.92409e-06	NA	NA	NA	NA	NA	NA	NA	NA	NA	NA	NA	NA	NA	NA	NA	NA	NA	NA	NA	NA	NA	NA	NA	NA	NA	NA	NA	NA	NA	NA
cg06903569	6.1397	0.0323222	6.6784e-07	NA	NA	NA	NA	NA	NA	NA	NA	NA	NA	NA	NA	NA	NA	NA	NA	NA	NA	NA	NA	NA	NA	NA	NA	NA	NA	NA	NA	NA	NA
cg06911744	NA	NA	NA	NA	NA	NA	NA	NA	NA	NA	NA	NA	NA	NA	NA	NA	NA	NA	NA	NA	NA	NA	NA	NA	3.58739	0.0046732	0.000580268	NA	NA	NA	NA	NA	NA
cg06921552	NA	NA	NA	NA	NA	NA	NA	NA	NA	NA	NA	NA	NA	NA	NA	NA	NA	NA	NA	NA	NA	NA	NA	NA	3.73831	0.0153093	0.000378975	NA	NA	NA	NA	NA	NA
cg06923531	NA	NA	NA	NA	NA	NA	NA	NA	NA	NA	NA	NA	NA	NA	NA	NA	NA	NA	NA	NA	NA	NA	NA	NA	4.61834	0.0125491	2.9609e-05	NA	NA	NA	NA	NA	NA
cg06945523	4.09399	0.0273755	0.000258989	NA	NA	NA	NA	NA	NA	NA	NA	NA	NA	NA	NA	NA	NA	NA	NA	NA	NA	NA	NA	NA	NA	NA	NA	NA	NA	NA	NA	NA	NA
cg06960164	NA	NA	NA	NA	NA	NA	NA	NA	NA	NA	NA	NA	NA	NA	NA	NA	NA	NA	NA	NA	NA	NA	NA	NA	3.78218	0.0228414	0.000334594	NA	NA	NA	NA	NA	NA
cg06966277	NA	NA	NA	NA	NA	NA	NA	NA	NA	NA	NA	NA	NA	NA	NA	NA	NA	NA	NA	NA	NA	NA	NA	NA	4.01591	0.020076	0.000171425	NA	NA	NA	NA	NA	NA
cg06970510	4.62362	0.038209	5.74876e-05	NA	NA	NA	NA	NA	NA	NA	NA	NA	NA	NA	NA	NA	NA	NA	NA	NA	NA	NA	NA	NA	NA	NA	NA	NA	NA	NA	NA	NA	NA
cg06980169	NA	NA	NA	NA	NA	NA	NA	NA	NA	NA	NA	NA	NA	NA	NA	NA	NA	NA	NA	NA	NA	NA	NA	NA	4.95278	0.0122039	1.10021e-05	NA	NA	NA	NA	NA	NA
cg06996940	NA	NA	NA	NA	NA	NA	NA	NA	NA	NA	NA	NA	NA	NA	NA	NA	NA	NA	NA	NA	NA	NA	NA	NA	4.87287	0.0267991	1.3949e-05	NA	NA	NA	NA	NA	NA
cg07001963	NA	NA	NA	NA	NA	NA	NA	NA	NA	NA	NA	NA	NA	NA	NA	NA	NA	NA	NA	NA	NA	NA	NA	NA	3.74784	0.0252334	0.000368871	NA	NA	NA	NA	NA	NA
cg07005513	4.83165	0.014028	3.15242e-05	NA	NA	NA	NA	NA	NA	NA	NA	NA	NA	NA	NA	NA	NA	NA	NA	NA	NA	NA	NA	NA	4.86439	0.00678452	1.43044e-05	NA	NA	NA	NA	NA	NA
cg07041323	4.20029	0.0159988	0.000192086	NA	NA	NA	NA	NA	NA	NA	NA	NA	NA	NA	NA	NA	NA	NA	NA	NA	NA	NA	NA	NA	NA	NA	NA	NA	NA	NA	NA	NA	NA
cg07042827	NA	NA	NA	NA	NA	NA	NA	NA	NA	NA	NA	NA	NA	NA	NA	NA	NA	NA	NA	NA	NA	NA	NA	NA	3.88424	0.0361675	0.000250113	NA	NA	NA	NA	NA	NA
cg07048608	4.57943	0.0283566	6.52739e-05	NA	NA	NA	NA	NA	NA	NA	NA	NA	NA	NA	NA	NA	NA	NA	NA	NA	NA	NA	NA	NA	4.08068	0.00621486	0.000142224	NA	NA	NA	NA	NA	NA
cg07070518	NA	NA	NA	NA	NA	NA	NA	NA	NA	NA	NA	NA	NA	NA	NA	NA	NA	NA	NA	NA	NA	NA	NA	NA	3.64931	0.00500956	0.000487452	NA	NA	NA	NA	NA	NA
cg07078225	4.13893	0.0479907	0.000228301	NA	NA	NA	NA	NA	NA	NA	NA	NA	NA	NA	NA	NA	NA	NA	NA	NA	NA	NA	NA	NA	NA	NA	NA	NA	NA	NA	NA	NA	NA
cg07091593	4.85895	0.0122467	2.91252e-05	NA	NA	NA	NA	NA	NA	NA	NA	NA	NA	NA	NA	NA	NA	NA	NA	NA	NA	NA	NA	NA	5.10801	0.0262886	6.92975e-06	NA	NA	NA	NA	NA	NA
cg07114009	NA	NA	NA	NA	NA	NA	NA	NA	NA	NA	NA	NA	NA	NA	NA	NA	NA	NA	NA	NA	NA	NA	NA	NA	4.2342	0.0124404	9.11612e-05	NA	NA	NA	NA	NA	NA
cg07137955	NA	NA	NA	NA	NA	NA	NA	NA	NA	NA	NA	NA	NA	NA	NA	NA	NA	NA	NA	NA	NA	NA	NA	NA	3.77036	0.0172718	0.000346021	NA	NA	NA	NA	NA	NA
cg07152591	NA	NA	NA	NA	NA	NA	NA	NA	NA	NA	NA	NA	NA	NA	NA	NA	NA	NA	NA	NA	NA	NA	NA	NA	3.84921	0.0195682	0.000276435	NA	NA	NA	NA	NA	NA
cg07153665	NA	NA	NA	NA	NA	NA	NA	NA	NA	NA	NA	NA	NA	NA	NA	NA	NA	NA	NA	NA	NA	NA	NA	NA	3.59708	0.026247	0.000564671	NA	NA	NA	NA	NA	NA
cg07165288	4.30437	0.00346959	0.00014311	NA	NA	NA	NA	NA	NA	NA	NA	NA	NA	NA	NA	NA	NA	NA	NA	NA	NA	NA	NA	NA	4.14278	0.00716376	0.000118848	NA	NA	NA	NA	NA	NA
cg07178977	NA	NA	NA	NA	NA	NA	NA	NA	NA	NA	NA	NA	NA	NA	NA	NA	NA	NA	NA	NA	NA	NA	NA	NA	3.93594	0.0105605	0.000215699	NA	NA	NA	NA	NA	NA
cg07200280	NA	NA	NA	NA	NA	NA	NA	NA	NA	NA	NA	NA	NA	NA	NA	NA	NA	NA	NA	NA	NA	NA	NA	NA	4.7633	0.0208937	1.92993e-05	NA	NA	NA	NA	NA	NA
cg07326438	4.80466	0.0360372	3.40886e-05	NA	NA	NA	NA	NA	NA	NA	NA	NA	NA	NA	NA	NA	NA	NA	NA	NA	NA	NA	NA	NA	4.55027	0.0192856	3.61774e-05	NA	NA	NA	NA	NA	NA
cg07345510	NA	NA	NA	NA	NA	NA	6.45023	0.0254381	4.84204e-06	NA	NA	NA	NA	NA	NA	NA	NA	NA	NA	NA	NA	NA	NA	NA	NA	NA	NA	NA	NA	NA	NA	NA	NA
cg07378762	4.11793	0.0282764	0.000242174	NA	NA	NA	NA	NA	NA	NA	NA	NA	NA	NA	NA	NA	NA	NA	NA	NA	NA	NA	NA	NA	NA	NA	NA	NA	NA	NA	NA	NA	NA
cg07381778	NA	NA	NA	NA	NA	NA	NA	NA	NA	NA	NA	NA	NA	NA	NA	NA	NA	NA	NA	NA	NA	NA	NA	NA	4.39557	0.0258922	5.69464e-05	NA	NA	NA	NA	NA	NA
cg07442907	NA	NA	NA	NA	NA	NA	NA	NA	NA	NA	NA	NA	NA	NA	NA	NA	NA	NA	NA	NA	NA	NA	NA	NA	3.81544	0.0339064	0.000304373	NA	NA	NA	NA	NA	NA
cg07449038	4.5701	0.0417665	6.70458e-05	NA	NA	NA	NA	NA	NA	NA	NA	NA	NA	NA	NA	NA	NA	NA	NA	NA	NA	NA	NA	NA	4.13297	0.0326635	0.00012227	NA	NA	NA	NA	NA	NA
cg07458308	4.14477	0.0227753	0.000224587	NA	NA	NA	NA	NA	NA	NA	NA	NA	NA	NA	NA	NA	NA	NA	NA	NA	NA	NA	NA	NA	NA	NA	NA	NA	NA	NA	NA	NA	NA
cg07484673	5.36549	0.0395194	6.62444e-06	NA	NA	NA	NA	NA	NA	NA	NA	NA	NA	NA	NA	NA	NA	NA	NA	NA	NA	NA	NA	NA	4.43281	0.0272221	5.10651e-05	NA	NA	NA	NA	NA	NA
cg07489869	NA	NA	NA	NA	NA	NA	NA	NA	NA	NA	NA	NA	NA	NA	NA	NA	NA	NA	NA	NA	NA	NA	NA	NA	4.72624	0.0439299	2.15343e-05	NA	NA	NA	NA	NA	NA
cg07546360	4.09523	0.044023	0.000258093	NA	NA	NA	NA	NA	NA	NA	NA	NA	NA	NA	NA	NA	NA	NA	NA	NA	NA	NA	NA	NA	NA	NA	NA	NA	NA	NA	NA	NA	NA
cg07558472	4.88117	0.00966569	2.73055e-05	NA	NA	NA	NA	NA	NA	NA	NA	NA	NA	NA	NA	NA	NA	NA	NA	NA	NA	NA	NA	NA	3.72978	0.0096143	0.000388261	NA	NA	NA	NA	NA	NA
cg07560096	NA	NA	NA	NA	NA	NA	NA	NA	NA	NA	NA	NA	NA	NA	NA	NA	NA	NA	NA	NA	NA	NA	NA	NA	4.58461	0.0269777	3.27011e-05	NA	NA	NA	NA	NA	NA
cg07619799	NA	NA	NA	NA	NA	NA	NA	NA	NA	NA	NA	NA	NA	NA	NA	NA	NA	NA	NA	NA	NA	NA	NA	NA	-3.15756	0.0114844	0.000248765	NA	NA	NA	NA	NA	NA
cg07635623	4.60902	0.0361654	5.99536e-05	NA	NA	NA	NA	NA	NA	NA	NA	NA	NA	NA	NA	NA	NA	NA	NA	NA	NA	NA	NA	NA	4.07166	0.00659847	0.000145977	NA	NA	NA	NA	NA	NA
cg07639489	4.06288	0.0342006	0.000282561	NA	NA	NA	NA	NA	NA	NA	NA	NA	NA	NA	NA	NA	NA	NA	NA	NA	NA	NA	NA	NA	3.71047	0.0454891	0.000410087	NA	NA	NA	NA	NA	NA
cg07641160	NA	NA	NA	NA	NA	NA	NA	NA	NA	NA	NA	NA	NA	NA	NA	NA	NA	NA	NA	NA	NA	NA	NA	NA	3.67428	0.00922329	0.000454281	NA	NA	NA	NA	NA	NA
cg07693238	4.28957	0.031567	0.000149243	NA	NA	NA	NA	NA	NA	NA	NA	NA	NA	NA	NA	NA	NA	NA	NA	NA	NA	NA	NA	NA	4.19558	0.0425934	0.000101981	NA	NA	NA	NA	NA	NA
cg07701237	NA	NA	NA	NA	NA	NA	NA	NA	NA	NA	NA	NA	NA	NA	NA	NA	NA	NA	NA	NA	NA	NA	NA	NA	4.44112	0.0115946	4.98383e-05	NA	NA	NA	NA	NA	NA
cg07739188	NA	NA	NA	NA	NA	NA	NA	NA	NA	NA	NA	NA	NA	NA	NA	NA	NA	NA	NA	NA	NA	NA	NA	NA	5.41082	0.013209	2.80116e-06	NA	NA	NA	NA	NA	NA
cg07756501	NA	NA	NA	NA	NA	NA	NA	NA	NA	NA	NA	NA	NA	NA	NA	NA	NA	NA	NA	NA	NA	NA	NA	NA	3.5973	0.00594626	0.000564326	NA	NA	NA	NA	NA	NA
cg07774096	4.063	0.0156342	0.000282473	NA	NA	NA	NA	NA	NA	NA	NA	NA	NA	NA	NA	NA	NA	NA	NA	NA	NA	NA	NA	NA	NA	NA	NA	NA	NA	NA	NA	NA	NA
cg07779699	4.09508	0.0175133	0.000258202	NA	NA	NA	NA	NA	NA	NA	NA	NA	NA	NA	NA	NA	NA	NA	NA	NA	NA	NA	NA	NA	NA	NA	NA	NA	NA	NA	NA	NA	NA
cg07782620	NA	NA	NA	NA	NA	NA	NA	NA	NA	NA	NA	NA	NA	NA	NA	NA	NA	NA	NA	NA	NA	NA	NA	NA	4.39269	0.0333821	5.74271e-05	NA	NA	NA	NA	NA	NA
cg07786675	5.7641	0.0344532	2.04032e-06	NA	NA	NA	NA	NA	NA	NA	NA	NA	NA	NA	NA	NA	NA	NA	NA	NA	NA	NA	NA	NA	NA	NA	NA	NA	NA	NA	NA	NA	NA
cg07817783	NA	NA	NA	NA	NA	NA	NA	NA	NA	NA	NA	NA	NA	NA	NA	NA	NA	NA	NA	NA	NA	NA	NA	NA	4.10642	0.0496013	0.00013203	NA	NA	NA	NA	NA	NA
cg07833467	NA	NA	NA	NA	NA	NA	NA	NA	NA	NA	NA	NA	NA	NA	NA	NA	NA	NA	NA	NA	NA	NA	NA	NA	3.9533	0.0290029	0.000205219	NA	NA	NA	NA	NA	NA
cg07844977	5.32326	0.0365944	7.5006e-06	NA	NA	NA	NA	NA	NA	NA	NA	NA	NA	NA	NA	NA	NA	NA	NA	NA	NA	NA	NA	NA	4.81478	0.0182987	1.65707e-05	NA	NA	NA	NA	NA	NA
cg07849805	NA	NA	NA	NA	NA	NA	NA	NA	NA	NA	NA	NA	NA	NA	NA	NA	NA	NA	NA	NA	NA	NA	NA	NA	NA	NA	NA	5.96364	0.00492521	1.50392e-05	NA	NA	NA
cg07858113	4.46422	0.0469072	9.07956e-05	NA	NA	NA	NA	NA	NA	NA	NA	NA	NA	NA	NA	NA	NA	NA	NA	NA	NA	NA	NA	NA	4.26907	0.048503	8.23687e-05	NA	NA	NA	NA	NA	NA
cg07879897	NA	NA	NA	NA	NA	NA	NA	NA	NA	NA	NA	NA	NA	NA	NA	NA	NA	NA	NA	NA	NA	NA	NA	NA	3.8077	0.0241699	0.000311159	NA	NA	NA	NA	NA	NA
cg07922007	4.71714	0.0117068	4.39067e-05	NA	NA	NA	NA	NA	NA	NA	NA	NA	NA	NA	NA	NA	NA	NA	NA	NA	NA	NA	NA	NA	5.66612	0.0142388	1.3007e-06	NA	NA	NA	NA	NA	NA
cg07928232	-4.43802	0.0192267	9.78479e-05	NA	NA	NA	NA	NA	NA	NA	NA	NA	NA	NA	NA	NA	NA	NA	NA	NA	NA	NA	NA	NA	NA	NA	NA	NA	NA	NA	NA	NA	NA
cg07940593	NA	NA	NA	NA	NA	NA	NA	NA	NA	NA	NA	NA	NA	NA	NA	NA	NA	NA	NA	NA	NA	NA	NA	NA	3.59262	0.0264992	0.000571796	NA	NA	NA	NA	NA	NA
cg07968031	NA	NA	NA	NA	NA	NA	NA	NA	NA	NA	NA	NA	NA	NA	NA	NA	NA	NA	NA	NA	NA	NA	NA	NA	5.90136	0.0113363	6.40063e-07	NA	NA	NA	NA	NA	NA
cg07990843	NA	NA	NA	NA	NA	NA	NA	NA	NA	NA	NA	NA	NA	NA	NA	NA	NA	NA	NA	NA	NA	NA	NA	NA	4.46387	0.0143898	4.66234e-05	NA	NA	NA	NA	NA	NA
cg08010362	4.30715	0.0236808	0.000141985	NA	NA	NA	NA	NA	NA	NA	NA	NA	NA	NA	NA	NA	NA	NA	NA	NA	NA	NA	NA	NA	NA	NA	NA	NA	NA	NA	NA	NA	NA
cg08012275	NA	NA	NA	NA	NA	NA	NA	NA	NA	NA	NA	NA	NA	NA	NA	NA	NA	NA	NA	NA	NA	NA	NA	NA	4.35882	0.00241279	6.34038e-05	NA	NA	NA	NA	NA	NA
cg08014994	NA	NA	NA	NA	NA	NA	NA	NA	NA	NA	NA	NA	NA	NA	NA	NA	NA	NA	NA	NA	NA	NA	NA	NA	4.49986	0.0168911	4.19524e-05	NA	NA	NA	NA	NA	NA
cg08089301	4.16904	0.010659	0.000209761	NA	NA	NA	NA	NA	NA	NA	NA	NA	NA	NA	NA	NA	NA	NA	NA	NA	NA	NA	NA	NA	4.34071	0.043737	6.68456e-05	NA	NA	NA	NA	NA	NA
cg08130179	NA	NA	NA	NA	NA	NA	NA	NA	NA	NA	NA	NA	NA	NA	NA	NA	NA	NA	NA	NA	NA	NA	NA	NA	3.59091	0.0296891	0.000574549	NA	NA	NA	NA	NA	NA
cg08134053	NA	NA	NA	NA	NA	NA	NA	NA	NA	NA	NA	NA	NA	NA	NA	NA	NA	NA	NA	NA	NA	NA	NA	NA	4.00572	0.0492643	0.000176525	NA	NA	NA	NA	NA	NA
cg08148891	NA	NA	NA	NA	NA	NA	NA	NA	NA	NA	NA	NA	NA	NA	NA	NA	NA	NA	NA	NA	NA	NA	NA	NA	3.83059	0.0190153	0.000291515	NA	NA	NA	NA	NA	NA
cg08149193	NA	NA	NA	NA	NA	NA	NA	NA	NA	NA	NA	NA	NA	NA	NA	NA	NA	NA	NA	NA	NA	NA	NA	NA	4.26407	0.0409377	8.35762e-05	NA	NA	NA	NA	NA	NA
cg08153160	NA	NA	NA	NA	NA	NA	NA	NA	NA	NA	NA	NA	NA	NA	NA	NA	NA	NA	NA	NA	NA	NA	NA	NA	4.33177	0.0493524	6.86133e-05	NA	NA	NA	NA	NA	NA
cg08160253	NA	NA	NA	NA	NA	NA	NA	NA	NA	NA	NA	NA	NA	NA	NA	NA	NA	NA	NA	NA	NA	NA	NA	NA	3.67092	0.041106	0.000458608	NA	NA	NA	NA	NA	NA
cg08224920	4.0788	0.0305521	0.000270247	NA	NA	NA	NA	NA	NA	NA	NA	NA	NA	NA	NA	NA	NA	NA	NA	NA	NA	NA	NA	NA	NA	NA	NA	NA	NA	NA	NA	NA	NA
cg08248955	5.11224	0.0241739	1.39255e-05	NA	NA	NA	NA	NA	NA	NA	NA	NA	NA	NA	NA	NA	NA	NA	NA	NA	NA	NA	NA	NA	5.51834	0.0199406	2.02848e-06	NA	NA	NA	NA	NA	NA
cg08251901	5.0433	0.0111235	1.7032e-05	NA	NA	NA	NA	NA	NA	NA	NA	NA	NA	NA	NA	NA	NA	NA	NA	NA	NA	NA	NA	NA	4.91389	0.0145109	1.23499e-05	NA	NA	NA	NA	NA	NA
cg08259755	4.1547	0.0241018	0.000218401	NA	NA	NA	NA	NA	NA	NA	NA	NA	NA	NA	NA	NA	NA	NA	NA	NA	NA	NA	NA	NA	5.3286	0.030219	3.58388e-06	NA	NA	NA	NA	NA	NA
cg08270005	NA	NA	NA	NA	NA	NA	NA	NA	NA	NA	NA	NA	NA	NA	NA	NA	NA	NA	NA	NA	NA	NA	NA	NA	3.59551	0.0160228	0.000567178	NA	NA	NA	NA	NA	NA
cg08289692	NA	NA	NA	NA	NA	NA	NA	NA	NA	NA	NA	NA	NA	NA	NA	NA	NA	NA	NA	NA	NA	NA	NA	NA	4.69433	0.0285057	2.36637e-05	NA	NA	NA	NA	NA	NA
cg08331345	NA	NA	NA	NA	NA	NA	NA	NA	NA	NA	NA	NA	NA	NA	NA	NA	NA	NA	NA	NA	NA	NA	NA	NA	3.79397	0.0231606	0.000323556	NA	NA	NA	NA	NA	NA
cg08331842	NA	NA	NA	NA	NA	NA	NA	NA	NA	NA	NA	NA	NA	NA	NA	NA	NA	NA	NA	NA	NA	NA	NA	NA	4.30736	0.0491086	7.3676e-05	NA	NA	NA	NA	NA	NA
cg08347875	NA	NA	NA	NA	NA	NA	NA	NA	NA	NA	NA	NA	NA	NA	NA	NA	NA	NA	NA	NA	NA	NA	NA	NA	3.58889	0.00269705	0.000577821	NA	NA	NA	NA	NA	NA
cg08387014	4.92665	0.0283347	2.39251e-05	NA	NA	NA	NA	NA	NA	NA	NA	NA	NA	NA	NA	NA	NA	NA	NA	NA	NA	NA	NA	NA	6.60043	0.0291272	7.71277e-08	NA	NA	NA	NA	NA	NA
cg08387285	NA	NA	NA	NA	NA	NA	NA	NA	NA	NA	NA	NA	NA	NA	NA	NA	NA	NA	NA	NA	NA	NA	NA	NA	4.2234	0.029757	9.40687e-05	NA	NA	NA	NA	NA	NA
cg08461840	NA	NA	NA	NA	NA	NA	NA	NA	NA	NA	NA	NA	NA	NA	NA	NA	NA	NA	NA	NA	NA	NA	NA	NA	3.56733	0.0289068	0.000613877	NA	NA	NA	NA	NA	NA
cg08477594	NA	NA	NA	NA	NA	NA	NA	NA	NA	NA	NA	NA	NA	NA	NA	NA	NA	NA	NA	NA	NA	NA	NA	NA	4.03557	0.0426318	0.000161987	NA	NA	NA	NA	NA	NA
cg08482436	4.27008	0.0388841	0.000157713	NA	NA	NA	NA	NA	NA	NA	NA	NA	NA	NA	NA	NA	NA	NA	NA	NA	NA	NA	NA	NA	3.59711	0.00196067	0.000564631	NA	NA	NA	NA	NA	NA
cg08520743	NA	NA	NA	NA	NA	NA	NA	NA	NA	NA	NA	NA	NA	NA	NA	NA	NA	NA	NA	NA	NA	NA	NA	NA	5.55141	0.0145762	1.83663e-06	NA	NA	NA	NA	NA	NA
cg08530414	NA	NA	NA	NA	NA	NA	NA	NA	NA	NA	NA	NA	NA	NA	NA	NA	NA	NA	NA	NA	NA	NA	NA	NA	4.07318	0.0299662	0.000145336	NA	NA	NA	NA	NA	NA
cg08530859	NA	NA	NA	NA	NA	NA	NA	NA	NA	NA	NA	NA	NA	NA	NA	NA	NA	NA	NA	NA	NA	NA	NA	NA	3.94676	0.00967215	0.000209104	NA	NA	NA	NA	NA	NA
cg08542865	4.86704	0.017658	2.84491e-05	NA	NA	NA	NA	NA	NA	NA	NA	NA	NA	NA	NA	NA	NA	NA	NA	NA	NA	NA	NA	NA	4.35927	0.0430991	6.33199e-05	NA	NA	NA	NA	NA	NA
cg08543966	NA	NA	NA	NA	NA	NA	NA	NA	NA	NA	NA	NA	NA	NA	NA	NA	NA	NA	NA	NA	NA	NA	NA	NA	3.89375	0.0117459	0.0002434	NA	NA	NA	NA	NA	NA
cg08555612	4.43376	0.0227886	9.90462e-05	NA	NA	NA	NA	NA	NA	NA	NA	NA	NA	NA	NA	NA	NA	NA	NA	NA	NA	NA	NA	NA	NA	NA	NA	NA	NA	NA	NA	NA	NA
cg08601898	NA	NA	NA	NA	NA	NA	NA	NA	NA	NA	NA	NA	NA	NA	NA	NA	NA	NA	NA	NA	NA	NA	NA	NA	3.74129	0.0312293	0.000375793	NA	NA	NA	NA	NA	NA
cg08615596	4.70676	0.011713	4.52414e-05	NA	NA	NA	NA	NA	NA	NA	NA	NA	NA	NA	NA	NA	NA	NA	NA	NA	NA	NA	NA	NA	NA	NA	NA	NA	NA	NA	NA	NA	NA
cg08692104	NA	NA	NA	NA	NA	NA	NA	NA	NA	NA	NA	NA	NA	NA	NA	NA	NA	NA	NA	NA	NA	NA	NA	NA	3.88762	0.0480796	0.000247707	NA	NA	NA	NA	NA	NA
cg08712008	NA	NA	NA	NA	NA	NA	NA	NA	NA	NA	NA	NA	NA	NA	NA	NA	NA	NA	NA	NA	NA	NA	NA	NA	3.62604	0.0108952	0.000520498	NA	NA	NA	NA	NA	NA
cg08713212	NA	NA	NA	NA	NA	NA	NA	NA	NA	NA	NA	NA	NA	NA	NA	NA	NA	NA	NA	NA	NA	NA	NA	NA	4.17709	0.00730044	0.000107602	NA	NA	NA	NA	NA	NA
cg08725962	NA	NA	NA	NA	NA	NA	NA	NA	NA	NA	NA	NA	NA	NA	NA	NA	NA	NA	NA	NA	NA	NA	NA	NA	3.68414	0.0164174	0.000441797	NA	NA	NA	NA	NA	NA
cg08763705	NA	NA	NA	NA	NA	NA	NA	NA	NA	NA	NA	NA	NA	NA	NA	NA	NA	NA	NA	NA	NA	NA	NA	NA	NA	NA	NA	NA	NA	NA	-8.43557	0.0128293	3.17138e-06
cg08773462	4.24214	0.0314152	0.000170678	NA	NA	NA	NA	NA	NA	NA	NA	NA	NA	NA	NA	NA	NA	NA	NA	NA	NA	NA	NA	NA	NA	NA	NA	NA	NA	NA	NA	NA	NA
cg08781140	4.24679	0.0434388	0.000168451	NA	NA	NA	NA	NA	NA	NA	NA	NA	NA	NA	NA	NA	NA	NA	NA	NA	NA	NA	NA	NA	NA	NA	NA	NA	NA	NA	NA	NA	NA
cg08786026	NA	NA	NA	NA	NA	NA	NA	NA	NA	NA	NA	NA	NA	NA	NA	NA	NA	NA	NA	NA	NA	NA	NA	NA	5.02256	0.0448769	8.93973e-06	NA	NA	NA	NA	NA	NA
cg08814105	4.25823	0.0311016	0.000163089	NA	NA	NA	NA	NA	NA	NA	NA	NA	NA	NA	NA	NA	NA	NA	NA	NA	NA	NA	NA	NA	3.95486	0.0226288	0.000204305	NA	NA	NA	NA	NA	NA
cg08825929	NA	NA	NA	NA	NA	NA	NA	NA	NA	NA	NA	NA	NA	NA	NA	NA	NA	NA	NA	NA	NA	NA	NA	NA	3.81086	0.0147065	0.00030837	NA	NA	NA	NA	NA	NA
cg08827733	NA	NA	NA	NA	NA	NA	NA	NA	NA	NA	NA	NA	NA	NA	NA	NA	NA	NA	NA	NA	NA	NA	NA	NA	NA	NA	NA	6.02959	0.0159303	1.29013e-05	NA	NA	NA
cg08848774	NA	NA	NA	NA	NA	NA	NA	NA	NA	NA	NA	NA	NA	NA	NA	NA	NA	NA	NA	NA	NA	NA	NA	NA	3.85672	0.0428483	0.000270573	NA	NA	NA	NA	NA	NA
cg08857479	4.75586	0.0269557	3.92595e-05	NA	NA	NA	NA	NA	NA	NA	NA	NA	NA	NA	NA	NA	NA	NA	NA	NA	NA	NA	NA	NA	3.96204	0.0135601	0.000200136	NA	NA	NA	NA	NA	NA
cg08862890	NA	NA	NA	NA	NA	NA	NA	NA	NA	NA	NA	NA	NA	NA	NA	NA	NA	NA	NA	NA	NA	NA	NA	NA	4.66792	0.0422808	2.55823e-05	NA	NA	NA	NA	NA	NA
cg08881680	NA	NA	NA	NA	NA	NA	NA	NA	NA	NA	NA	NA	NA	NA	NA	NA	NA	NA	NA	NA	NA	NA	NA	NA	4.28207	0.0231473	7.93094e-05	NA	NA	NA	NA	NA	NA
cg08888625	NA	NA	NA	NA	NA	NA	-5.42486	0.0477573	8.50009e-06	NA	NA	NA	NA	NA	NA	NA	NA	NA	NA	NA	NA	NA	NA	NA	NA	NA	NA	NA	NA	NA	NA	NA	NA
cg08933939	NA	NA	NA	NA	NA	NA	NA	NA	NA	NA	NA	NA	NA	NA	NA	NA	NA	NA	NA	NA	NA	NA	NA	NA	4.45388	0.0453531	4.80082e-05	NA	NA	NA	NA	NA	NA
cg08952506	4.73543	0.0311364	4.16467e-05	NA	NA	NA	NA	NA	NA	NA	NA	NA	NA	NA	NA	NA	NA	NA	NA	NA	NA	NA	NA	NA	4.10858	0.0233855	0.00013121	NA	NA	NA	NA	NA	NA
cg08967106	NA	NA	NA	NA	NA	NA	NA	NA	NA	NA	NA	NA	NA	NA	NA	NA	NA	NA	NA	NA	NA	NA	NA	NA	3.6608	0.0326295	0.0004719	NA	NA	NA	NA	NA	NA
cg09010671	NA	NA	NA	NA	NA	NA	NA	NA	NA	NA	NA	NA	NA	NA	NA	NA	NA	NA	NA	NA	NA	NA	NA	NA	3.99924	0.0114803	0.000179846	NA	NA	NA	NA	NA	NA
cg09019936	NA	NA	NA	NA	NA	NA	NA	NA	NA	NA	NA	NA	NA	NA	NA	NA	NA	NA	NA	NA	NA	NA	NA	NA	3.91753	0.00674316	0.000227381	NA	NA	NA	NA	NA	NA
cg09025501	4.26783	0.00554166	0.000158718	NA	NA	NA	NA	NA	NA	NA	NA	NA	NA	NA	NA	NA	NA	NA	NA	NA	NA	NA	NA	NA	NA	NA	NA	NA	NA	NA	NA	NA	NA
cg09034601	NA	NA	NA	NA	NA	NA	NA	NA	NA	NA	NA	NA	NA	NA	NA	NA	NA	NA	NA	NA	NA	NA	NA	NA	3.81673	0.0089768	0.00030326	NA	NA	NA	NA	NA	NA
cg09066338	4.34193	0.0275834	0.000128642	NA	NA	NA	NA	NA	NA	NA	NA	NA	NA	NA	NA	NA	NA	NA	NA	NA	NA	NA	NA	NA	NA	NA	NA	NA	NA	NA	NA	NA	NA
cg09088508	NA	NA	NA	NA	NA	NA	NA	NA	NA	NA	NA	NA	NA	NA	NA	NA	NA	NA	NA	NA	NA	NA	NA	NA	3.84082	0.0331211	0.000283134	NA	NA	NA	NA	NA	NA
cg09092054	NA	NA	NA	NA	NA	NA	NA	NA	NA	NA	NA	NA	NA	NA	NA	NA	NA	NA	NA	NA	NA	NA	NA	NA	4.85059	0.0108282	1.49021e-05	NA	NA	NA	NA	NA	NA
cg09093150	NA	NA	NA	NA	NA	NA	NA	NA	NA	NA	NA	NA	NA	NA	NA	NA	NA	NA	NA	NA	NA	NA	NA	NA	4.2694	0.00956135	8.22908e-05	NA	NA	NA	NA	NA	NA
cg09101796	4.13515	0.0232041	0.000230738	NA	NA	NA	NA	NA	NA	NA	NA	NA	NA	NA	NA	NA	NA	NA	NA	NA	NA	NA	NA	NA	3.90236	0.0166863	0.000237474	NA	NA	NA	NA	NA	NA
cg09118312	NA	NA	NA	NA	NA	NA	NA	NA	NA	NA	NA	NA	NA	NA	NA	NA	NA	NA	NA	NA	NA	NA	NA	NA	3.89233	0.0208058	0.000244388	NA	NA	NA	NA	NA	NA
cg09155701	NA	NA	NA	NA	NA	NA	NA	NA	NA	NA	NA	NA	NA	NA	NA	NA	NA	NA	NA	NA	NA	NA	NA	NA	4.27998	0.0212764	7.97945e-05	NA	NA	NA	NA	NA	NA
cg09158314	4.29736	0.0447696	0.000145982	NA	NA	NA	NA	NA	NA	NA	NA	NA	NA	NA	NA	NA	NA	NA	NA	NA	NA	NA	NA	NA	NA	NA	NA	NA	NA	NA	NA	NA	NA
cg09162916	NA	NA	NA	NA	NA	NA	NA	NA	NA	NA	NA	NA	NA	NA	NA	NA	NA	NA	NA	NA	NA	NA	NA	NA	3.78362	0.00645805	0.000333228	NA	NA	NA	NA	NA	NA
cg09194159	6.36033	0.0184415	3.4572e-07	NA	NA	NA	NA	NA	NA	NA	NA	NA	NA	NA	NA	NA	NA	NA	NA	NA	NA	NA	NA	NA	6.52286	0.0347934	9.75918e-08	NA	NA	NA	NA	NA	NA
cg09205538	NA	NA	NA	NA	NA	NA	NA	NA	NA	NA	NA	NA	NA	NA	NA	NA	NA	NA	NA	NA	NA	NA	NA	NA	3.89766	0.0182657	0.000240692	NA	NA	NA	NA	NA	NA
cg09224689	NA	NA	NA	NA	NA	NA	5.7473	0.0126316	2.48528e-05	NA	NA	NA	NA	NA	NA	NA	NA	NA	NA	NA	NA	NA	NA	NA	NA	NA	NA	NA	NA	NA	NA	NA	NA
cg09238180	NA	NA	NA	NA	NA	NA	NA	NA	NA	NA	NA	NA	NA	NA	NA	NA	NA	NA	NA	NA	NA	NA	NA	NA	3.60419	0.0098408	0.000553497	NA	NA	NA	NA	NA	NA
cg09238957	NA	NA	NA	NA	NA	NA	NA	NA	NA	NA	NA	NA	NA	NA	NA	NA	NA	NA	NA	NA	NA	NA	NA	NA	3.72223	0.0314192	0.000396649	NA	NA	NA	NA	NA	NA
cg09248054	4.23741	0.0204817	0.000172975	NA	NA	NA	NA	NA	NA	NA	NA	NA	NA	NA	NA	NA	NA	NA	NA	NA	NA	NA	NA	NA	NA	NA	NA	NA	NA	NA	NA	NA	NA
cg09250072	-4.45087	0.0386777	9.4323e-05	NA	NA	NA	NA	NA	NA	NA	NA	NA	NA	NA	NA	NA	NA	NA	NA	NA	NA	NA	NA	NA	NA	NA	NA	NA	NA	NA	NA	NA	NA
cg09297463	NA	NA	NA	NA	NA	NA	NA	NA	NA	NA	NA	NA	NA	NA	NA	NA	NA	NA	NA	NA	NA	NA	NA	NA	3.68327	0.00439238	0.000442882	NA	NA	NA	NA	NA	NA
cg09323657	NA	NA	NA	NA	NA	NA	NA	NA	NA	NA	NA	NA	NA	NA	NA	NA	NA	NA	NA	NA	NA	NA	NA	NA	3.61246	0.0118969	0.000540782	NA	NA	NA	NA	NA	NA
cg09349604	4.73252	0.0288908	4.19989e-05	NA	NA	NA	NA	NA	NA	NA	NA	NA	NA	NA	NA	NA	NA	NA	NA	NA	NA	NA	NA	NA	4.5917	0.0205634	3.2026e-05	NA	NA	NA	NA	NA	NA
cg09386265	4.50843	0.0242803	8.00112e-05	NA	NA	NA	NA	NA	NA	NA	NA	NA	NA	NA	NA	NA	NA	NA	NA	NA	NA	NA	NA	NA	NA	NA	NA	NA	NA	NA	NA	NA	NA
cg09404551	NA	NA	NA	NA	NA	NA	NA	NA	NA	NA	NA	NA	NA	NA	NA	NA	NA	NA	NA	NA	NA	NA	NA	NA	3.77955	0.0123982	0.000337103	NA	NA	NA	NA	NA	NA
cg09410154	NA	NA	NA	NA	NA	NA	NA	NA	NA	NA	NA	NA	NA	NA	NA	NA	NA	NA	NA	NA	NA	NA	NA	NA	4.61978	0.0427206	2.94836e-05	NA	NA	NA	NA	NA	NA
cg09425247	4.92375	0.00624179	2.41278e-05	NA	NA	NA	NA	NA	NA	NA	NA	NA	NA	NA	NA	NA	NA	NA	NA	NA	NA	NA	NA	NA	5.27015	0.0368761	4.26918e-06	NA	NA	NA	NA	NA	NA
cg09432613	NA	NA	NA	NA	NA	NA	NA	NA	NA	NA	NA	NA	NA	NA	NA	NA	NA	NA	NA	NA	NA	NA	NA	NA	4.10301	0.0144173	0.000133339	NA	NA	NA	NA	NA	NA
cg09451960	NA	NA	NA	NA	NA	NA	NA	NA	NA	NA	NA	NA	NA	NA	NA	NA	NA	NA	NA	NA	NA	NA	NA	NA	3.76822	0.0104741	0.000348133	NA	NA	NA	NA	NA	NA
cg09516965	NA	NA	NA	NA	NA	NA	NA	NA	NA	NA	NA	NA	NA	NA	NA	NA	NA	NA	NA	NA	NA	NA	NA	NA	3.68973	0.0107757	0.000434873	NA	NA	NA	NA	NA	NA
cg09654997	NA	NA	NA	NA	NA	NA	NA	NA	NA	NA	NA	NA	NA	NA	NA	NA	NA	NA	NA	NA	NA	NA	NA	NA	4.22424	0.020649	9.38376e-05	NA	NA	NA	NA	NA	NA
cg09666006	NA	NA	NA	NA	NA	NA	NA	NA	NA	NA	NA	NA	NA	NA	NA	NA	NA	NA	NA	NA	NA	NA	NA	NA	3.98935	0.0426794	0.000185033	NA	NA	NA	NA	NA	NA
cg09671481	6.14168	0.0251819	6.63923e-07	NA	NA	NA	NA	NA	NA	NA	NA	NA	NA	NA	NA	NA	NA	NA	NA	NA	NA	NA	NA	NA	5.87735	0.0332099	6.88178e-07	NA	NA	NA	NA	NA	NA
cg09721739	NA	NA	NA	NA	NA	NA	NA	NA	NA	NA	NA	NA	NA	NA	NA	NA	NA	NA	NA	NA	NA	NA	NA	NA	3.66208	0.00699689	0.000470205	NA	NA	NA	NA	NA	NA
cg09745440	4.94196	0.0477521	2.28834e-05	NA	NA	NA	NA	NA	NA	NA	NA	NA	NA	NA	NA	NA	NA	NA	NA	NA	NA	NA	NA	NA	4.80812	0.00963505	1.69012e-05	NA	NA	NA	NA	NA	NA
cg09746279	NA	NA	NA	NA	NA	NA	NA	NA	NA	NA	NA	NA	NA	NA	NA	NA	NA	NA	NA	NA	NA	NA	NA	NA	4.00791	0.0186242	0.000175413	NA	NA	NA	NA	NA	NA
cg09763347	NA	NA	NA	NA	NA	NA	NA	NA	NA	NA	NA	NA	NA	NA	NA	NA	NA	NA	NA	NA	NA	NA	NA	NA	4.74556	0.00677017	2.03393e-05	NA	NA	NA	NA	NA	NA
cg09771183	NA	NA	NA	NA	NA	NA	NA	NA	NA	NA	NA	NA	NA	NA	NA	NA	NA	NA	NA	NA	NA	NA	NA	NA	4.54777	0.0359589	3.64438e-05	NA	NA	NA	NA	NA	NA
cg09780180	4.08046	0.00764402	0.000268999	NA	NA	NA	NA	NA	NA	NA	NA	NA	NA	NA	NA	NA	NA	NA	NA	NA	NA	NA	NA	NA	NA	NA	NA	NA	NA	NA	NA	NA	NA
cg09789590	4.21487	0.0295319	0.000184343	NA	NA	NA	NA	NA	NA	NA	NA	NA	NA	NA	NA	NA	NA	NA	NA	NA	NA	NA	NA	NA	3.66141	0.0471461	0.000471093	NA	NA	NA	NA	NA	NA
cg09798536	4.65962	0.0124635	5.18288e-05	NA	NA	NA	NA	NA	NA	NA	NA	NA	NA	NA	NA	NA	NA	NA	NA	NA	NA	NA	NA	NA	4.94561	0.012052	1.12393e-05	NA	NA	NA	NA	NA	NA
cg09889291	NA	NA	NA	NA	NA	NA	NA	NA	NA	NA	NA	NA	NA	NA	NA	NA	NA	NA	NA	NA	NA	NA	NA	NA	4.68864	0.03116	2.4064e-05	NA	NA	NA	NA	NA	NA
cg09900436	6.36198	0.0284005	3.44022e-07	NA	NA	NA	NA	NA	NA	NA	NA	NA	NA	NA	NA	NA	NA	NA	NA	NA	NA	NA	NA	NA	6.97488	0.0477043	2.47401e-08	NA	NA	NA	NA	NA	NA
cg09906488	NA	NA	NA	NA	NA	NA	NA	NA	NA	NA	NA	NA	NA	NA	NA	NA	NA	NA	NA	NA	NA	NA	NA	NA	3.83396	0.0434941	0.000288727	NA	NA	NA	NA	NA	NA
cg09908110	4.70566	0.0282359	4.5386e-05	NA	NA	NA	NA	NA	NA	NA	NA	NA	NA	NA	NA	NA	NA	NA	NA	NA	NA	NA	NA	NA	4.23444	0.0186533	9.1099e-05	NA	NA	NA	NA	NA	NA
cg09915444	NA	NA	NA	NA	NA	NA	NA	NA	NA	NA	NA	NA	NA	NA	NA	NA	NA	NA	NA	NA	NA	NA	NA	NA	3.89813	0.00571167	0.000240371	NA	NA	NA	NA	NA	NA
cg09937849	NA	NA	NA	NA	NA	NA	NA	NA	NA	NA	NA	NA	NA	NA	NA	NA	NA	NA	NA	NA	NA	NA	NA	NA	3.99549	0.00766253	0.000181793	NA	NA	NA	NA	NA	NA
cg09970120	4.71749	0.0470607	4.38617e-05	NA	NA	NA	NA	NA	NA	NA	NA	NA	NA	NA	NA	NA	NA	NA	NA	NA	NA	NA	NA	NA	NA	NA	NA	NA	NA	NA	NA	NA	NA
cg09974990	4.31083	0.0343584	0.000140514	NA	NA	NA	NA	NA	NA	NA	NA	NA	NA	NA	NA	NA	NA	NA	NA	NA	NA	NA	NA	NA	NA	NA	NA	NA	NA	NA	NA	NA	NA
cg09998033	NA	NA	NA	NA	NA	NA	NA	NA	NA	NA	NA	NA	NA	NA	NA	NA	NA	NA	NA	NA	NA	NA	NA	NA	3.56634	0.0298781	0.000615588	NA	NA	NA	NA	NA	NA
cg10023272	4.28241	0.0387363	0.000152299	NA	NA	NA	NA	NA	NA	NA	NA	NA	NA	NA	NA	NA	NA	NA	NA	NA	NA	NA	NA	NA	3.69686	0.0437632	0.000426192	NA	NA	NA	NA	NA	NA
cg10026473	NA	NA	NA	NA	NA	NA	NA	NA	NA	NA	NA	NA	NA	NA	NA	NA	NA	NA	NA	NA	NA	NA	NA	NA	5.0702	0.0334139	7.75675e-06	NA	NA	NA	NA	NA	NA
cg10050900	NA	NA	NA	NA	NA	NA	NA	NA	NA	NA	NA	NA	NA	NA	NA	NA	NA	NA	NA	NA	NA	NA	NA	NA	3.59213	0.0333589	0.000572588	NA	NA	NA	NA	NA	NA
cg10067304	NA	NA	NA	NA	NA	NA	NA	NA	NA	NA	NA	NA	NA	NA	NA	NA	NA	NA	NA	NA	NA	NA	NA	NA	3.57333	0.00799323	0.000603635	NA	NA	NA	NA	NA	NA
cg10078335	NA	NA	NA	NA	NA	NA	NA	NA	NA	NA	NA	NA	NA	NA	NA	NA	NA	NA	NA	NA	NA	NA	NA	NA	3.89312	0.0343629	0.000243837	NA	NA	NA	NA	NA	NA
cg10098888	NA	NA	NA	NA	NA	NA	NA	NA	NA	NA	NA	NA	NA	NA	NA	NA	NA	NA	NA	NA	NA	NA	NA	NA	3.907	0.0234432	0.000234345	NA	NA	NA	NA	NA	NA
cg10157208	4.75475	0.0411452	3.9386e-05	NA	NA	NA	NA	NA	NA	NA	NA	NA	NA	NA	NA	NA	NA	NA	NA	NA	NA	NA	NA	NA	4.59123	0.0212125	3.20696e-05	NA	NA	NA	NA	NA	NA
cg10167296	NA	NA	NA	NA	NA	NA	NA	NA	NA	NA	NA	NA	NA	NA	NA	NA	NA	NA	NA	NA	NA	NA	NA	NA	4.9883	0.0350617	9.8992e-06	NA	NA	NA	NA	NA	NA
cg10178263	NA	NA	NA	NA	NA	NA	NA	NA	NA	NA	NA	NA	NA	NA	NA	NA	NA	NA	NA	NA	NA	NA	NA	NA	4.40916	0.0430843	5.47262e-05	NA	NA	NA	NA	NA	NA
cg10215330	NA	NA	NA	NA	NA	NA	NA	NA	NA	NA	NA	NA	NA	NA	NA	NA	NA	NA	NA	NA	NA	NA	NA	NA	NA	NA	NA	6.18989	0.0324654	8.88379e-06	NA	NA	NA
cg10230533	4.51797	0.0391105	7.78535e-05	NA	NA	NA	NA	NA	NA	NA	NA	NA	NA	NA	NA	NA	NA	NA	NA	NA	NA	NA	NA	NA	NA	NA	NA	NA	NA	NA	NA	NA	NA
cg10279487	NA	NA	NA	NA	NA	NA	NA	NA	NA	NA	NA	NA	8.99693	0.00885164	1.49053e-06	NA	NA	NA	NA	NA	NA	NA	NA	NA	NA	NA	NA	NA	NA	NA	NA	NA	NA
cg10317283	NA	NA	NA	NA	NA	NA	NA	NA	NA	NA	NA	NA	NA	NA	NA	NA	NA	NA	NA	NA	NA	NA	NA	NA	4.34127	0.040969	6.67367e-05	NA	NA	NA	NA	NA	NA
cg10338338	4.14568	0.0252121	0.000224008	NA	NA	NA	NA	NA	NA	NA	NA	NA	NA	NA	NA	NA	NA	NA	NA	NA	NA	NA	NA	NA	NA	NA	NA	NA	NA	NA	NA	NA	NA
cg10375078	4.09411	0.0454955	0.000258901	NA	NA	NA	NA	NA	NA	NA	NA	NA	NA	NA	NA	NA	NA	NA	NA	NA	NA	NA	NA	NA	4.05348	0.0213833	0.000153838	NA	NA	NA	NA	NA	NA
cg10390536	4.58082	0.0203251	6.50126e-05	NA	NA	NA	NA	NA	NA	NA	NA	NA	NA	NA	NA	NA	NA	NA	NA	NA	NA	NA	NA	NA	4.32795	0.0367012	6.93813e-05	NA	NA	NA	NA	NA	NA
cg10416814	NA	NA	NA	NA	NA	NA	NA	NA	NA	NA	NA	NA	NA	NA	NA	4.7714	0.0229314	8.5337e-07	NA	NA	NA	NA	NA	NA	NA	NA	NA	NA	NA	NA	NA	NA	NA
cg10431481	4.59477	0.0233882	6.24591e-05	NA	NA	NA	NA	NA	NA	NA	NA	NA	NA	NA	NA	NA	NA	NA	NA	NA	NA	NA	NA	NA	4.01741	0.0218742	0.000170683	NA	NA	NA	NA	NA	NA
cg10434977	5.00073	0.0322824	1.92836e-05	NA	NA	NA	NA	NA	NA	NA	NA	NA	NA	NA	NA	NA	NA	NA	NA	NA	NA	NA	NA	NA	NA	NA	NA	NA	NA	NA	NA	NA	NA
cg10435849	NA	NA	NA	NA	NA	NA	NA	NA	NA	NA	NA	NA	NA	NA	NA	NA	NA	NA	NA	NA	NA	NA	NA	NA	4.24553	0.00549633	8.82076e-05	NA	NA	NA	NA	NA	NA
cg10445911	5.10316	0.0318469	1.43002e-05	NA	NA	NA	NA	NA	NA	NA	NA	NA	NA	NA	NA	NA	NA	NA	NA	NA	NA	NA	NA	NA	NA	NA	NA	NA	NA	NA	NA	NA	NA
cg10474350	NA	NA	NA	NA	NA	NA	NA	NA	NA	NA	NA	NA	NA	NA	NA	NA	NA	NA	NA	NA	NA	NA	NA	NA	4.11105	0.0325155	0.000130276	NA	NA	NA	NA	NA	NA
cg10480343	4.40908	0.0247365	0.000106265	NA	NA	NA	NA	NA	NA	NA	NA	NA	NA	NA	NA	NA	NA	NA	NA	NA	NA	NA	NA	NA	NA	NA	NA	NA	NA	NA	NA	NA	NA
cg10492434	NA	NA	NA	NA	NA	NA	NA	NA	NA	NA	NA	NA	NA	NA	NA	NA	NA	NA	NA	NA	NA	NA	NA	NA	3.69308	0.0195733	0.000430772	NA	NA	NA	NA	NA	NA
cg10522125	NA	NA	NA	NA	NA	NA	NA	NA	NA	NA	NA	NA	NA	NA	NA	NA	NA	NA	NA	NA	NA	NA	NA	NA	4.08028	0.0278714	0.000142388	NA	NA	NA	NA	NA	NA
cg10540364	NA	NA	NA	NA	NA	NA	NA	NA	NA	NA	NA	NA	NA	NA	NA	NA	NA	NA	NA	NA	NA	NA	NA	NA	NA	NA	NA	5.82462	0.0382137	2.07717e-05	NA	NA	NA
cg10540626	NA	NA	NA	NA	NA	NA	NA	NA	NA	NA	NA	NA	NA	NA	NA	NA	NA	NA	NA	NA	NA	NA	NA	NA	3.61484	0.0228387	0.000537161	NA	NA	NA	NA	NA	NA
cg10544251	NA	NA	NA	NA	NA	NA	NA	NA	NA	NA	NA	NA	NA	NA	NA	NA	NA	NA	NA	NA	NA	NA	NA	NA	3.83141	0.0356788	0.000290829	NA	NA	NA	NA	NA	NA
cg10556384	NA	NA	NA	NA	NA	NA	NA	NA	NA	NA	NA	NA	NA	NA	NA	NA	NA	NA	NA	NA	NA	NA	NA	NA	3.74695	0.0294839	0.00036981	NA	NA	NA	NA	NA	NA
cg10575986	NA	NA	NA	NA	NA	NA	NA	NA	NA	NA	NA	NA	NA	NA	NA	NA	NA	NA	NA	NA	NA	NA	NA	NA	4.57975	0.0163079	3.31726e-05	NA	NA	NA	NA	NA	NA
cg10578007	NA	NA	NA	NA	NA	NA	NA	NA	NA	NA	NA	NA	NA	NA	NA	NA	NA	NA	NA	NA	NA	NA	NA	NA	3.84503	0.0188878	0.000279752	NA	NA	NA	NA	NA	NA
cg10588784	NA	NA	NA	NA	NA	NA	NA	NA	NA	NA	NA	NA	NA	NA	NA	NA	NA	NA	NA	NA	NA	NA	NA	NA	4.85092	0.0483729	1.48874e-05	NA	NA	NA	NA	NA	NA
cg10591516	NA	NA	NA	NA	NA	NA	NA	NA	NA	NA	NA	NA	NA	NA	NA	NA	NA	NA	NA	NA	NA	NA	NA	NA	3.74579	0.0181733	0.000371024	NA	NA	NA	NA	NA	NA
cg10607455	NA	NA	NA	NA	NA	NA	NA	NA	NA	NA	NA	NA	NA	NA	NA	NA	NA	NA	NA	NA	NA	NA	NA	NA	3.9816	0.00496223	0.000189204	NA	NA	NA	NA	NA	NA
cg10623840	NA	NA	NA	NA	NA	NA	NA	NA	NA	NA	NA	NA	NA	NA	NA	NA	NA	NA	NA	NA	NA	NA	NA	NA	3.72437	0.0436477	0.000394256	NA	NA	NA	NA	NA	NA
cg10680264	4.22932	0.0351599	0.000176973	NA	NA	NA	NA	NA	NA	NA	NA	NA	NA	NA	NA	NA	NA	NA	NA	NA	NA	NA	NA	NA	NA	NA	NA	NA	NA	NA	NA	NA	NA
cg10725316	4.63263	0.0264907	5.60169e-05	NA	NA	NA	NA	NA	NA	NA	NA	NA	NA	NA	NA	NA	NA	NA	NA	NA	NA	NA	NA	NA	NA	NA	NA	NA	NA	NA	NA	NA	NA
cg10739556	NA	NA	NA	NA	NA	NA	NA	NA	NA	NA	NA	NA	NA	NA	NA	NA	NA	NA	NA	NA	NA	NA	NA	NA	3.58313	0.0362448	0.000587248	NA	NA	NA	NA	NA	NA
cg10759983	NA	NA	NA	NA	NA	NA	NA	NA	NA	NA	NA	NA	NA	NA	NA	NA	NA	NA	NA	NA	NA	NA	NA	NA	3.96519	0.0105022	0.000198335	NA	NA	NA	NA	NA	NA
cg10793244	NA	NA	NA	NA	NA	NA	NA	NA	NA	NA	NA	NA	NA	NA	NA	NA	NA	NA	NA	NA	NA	NA	NA	NA	3.65793	0.0059357	0.00047574	NA	NA	NA	NA	NA	NA
cg10810394	NA	NA	NA	NA	NA	NA	NA	NA	NA	NA	NA	NA	NA	NA	NA	NA	NA	NA	NA	NA	NA	NA	NA	NA	3.79869	0.0154125	0.000319241	NA	NA	NA	NA	NA	NA
cg10826197	NA	NA	NA	NA	NA	NA	NA	NA	NA	NA	NA	NA	NA	NA	NA	NA	NA	NA	NA	NA	NA	NA	NA	NA	3.81545	0.0295305	0.000304369	NA	NA	NA	NA	NA	NA
cg10833091	NA	NA	NA	NA	NA	NA	NA	NA	NA	NA	NA	NA	NA	NA	NA	NA	NA	NA	NA	NA	NA	NA	NA	NA	3.59495	0.0329006	0.000568077	NA	NA	NA	NA	NA	NA
cg10835584	4.71216	0.00623707	4.45425e-05	NA	NA	NA	NA	NA	NA	NA	NA	NA	NA	NA	NA	NA	NA	NA	NA	NA	NA	NA	NA	NA	4.11491	0.030894	0.000128829	NA	NA	NA	NA	NA	NA
cg10864680	4.93535	0.0284117	2.33276e-05	NA	NA	NA	NA	NA	NA	NA	NA	NA	NA	NA	NA	NA	NA	NA	NA	NA	NA	NA	NA	NA	4.07237	0.0106752	0.000145676	NA	NA	NA	NA	NA	NA
cg10868875	4.148	0.0269569	0.000222552	NA	NA	NA	NA	NA	NA	NA	NA	NA	NA	NA	NA	NA	NA	NA	NA	NA	NA	NA	NA	NA	4.66075	0.0161654	2.61288e-05	NA	NA	NA	NA	NA	NA
cg10888337	5.33877	0.0333617	7.16625e-06	NA	NA	NA	NA	NA	NA	NA	NA	NA	NA	NA	NA	NA	NA	NA	NA	NA	NA	NA	NA	NA	NA	NA	NA	NA	NA	NA	NA	NA	NA
cg10888644	4.30572	0.00991639	0.000142566	NA	NA	NA	NA	NA	NA	NA	NA	NA	NA	NA	NA	NA	NA	NA	NA	NA	NA	NA	NA	NA	4.58366	0.0207566	3.27932e-05	NA	NA	NA	NA	NA	NA
cg10900068	4.88582	0.0238667	2.69394e-05	NA	NA	NA	NA	NA	NA	NA	NA	NA	NA	NA	NA	NA	NA	NA	NA	NA	NA	NA	NA	NA	4.80945	0.0410594	1.68347e-05	NA	NA	NA	NA	NA	NA
cg10971559	4.707	0.0257391	4.5211e-05	NA	NA	NA	NA	NA	NA	NA	NA	NA	NA	NA	NA	NA	NA	NA	NA	NA	NA	NA	NA	NA	4.396	0.0442914	5.68738e-05	NA	NA	NA	NA	NA	NA
cg10979436	NA	NA	NA	NA	NA	NA	NA	NA	NA	NA	NA	NA	NA	NA	NA	NA	NA	NA	NA	NA	NA	NA	NA	NA	3.9719	0.0435723	0.00019455	NA	NA	NA	NA	NA	NA
cg10999670	NA	NA	NA	NA	NA	NA	NA	NA	NA	NA	NA	NA	NA	NA	NA	NA	NA	NA	NA	NA	NA	NA	NA	NA	5.34767	0.0210266	3.38496e-06	NA	NA	NA	NA	NA	NA
cg11018723	NA	NA	NA	NA	NA	NA	NA	NA	NA	NA	NA	NA	NA	NA	NA	NA	NA	NA	NA	NA	NA	NA	NA	NA	3.95246	0.0336189	0.000205712	NA	NA	NA	NA	NA	NA
cg11027570	NA	NA	NA	NA	NA	NA	NA	NA	NA	NA	NA	NA	NA	NA	NA	NA	NA	NA	NA	NA	NA	NA	NA	NA	5.11669	0.0301106	6.75275e-06	NA	NA	NA	NA	NA	NA
cg11061946	NA	NA	NA	NA	NA	NA	NA	NA	NA	NA	NA	NA	NA	NA	NA	NA	NA	NA	5.35834	0.0152601	1.00165e-05	NA	NA	NA	NA	NA	NA	NA	NA	NA	NA	NA	NA
cg11092416	NA	NA	NA	NA	NA	NA	NA	NA	NA	NA	NA	NA	NA	NA	NA	NA	NA	NA	NA	NA	NA	NA	NA	NA	4.09774	0.0201882	0.000135384	NA	NA	NA	NA	NA	NA
cg11133524	NA	NA	NA	NA	NA	NA	NA	NA	NA	NA	NA	NA	NA	NA	NA	NA	NA	NA	NA	NA	NA	NA	NA	NA	3.79058	0.0243229	0.000326691	NA	NA	NA	NA	NA	NA
cg11172693	5.66887	0.0357003	2.70537e-06	NA	NA	NA	NA	NA	NA	NA	NA	NA	NA	NA	NA	NA	NA	NA	NA	NA	NA	NA	NA	NA	5.12777	0.0433579	6.53314e-06	NA	NA	NA	NA	NA	NA
cg11186224	NA	NA	NA	NA	NA	NA	NA	NA	NA	NA	NA	NA	NA	NA	NA	NA	NA	NA	5.59391	0.0170343	5.32868e-06	NA	NA	NA	NA	NA	NA	NA	NA	NA	NA	NA	NA
cg11194118	NA	NA	NA	NA	NA	NA	NA	NA	NA	NA	NA	NA	NA	NA	NA	NA	NA	NA	NA	NA	NA	NA	NA	NA	4.51143	0.032148	4.0551e-05	NA	NA	NA	NA	NA	NA
cg11223622	NA	NA	NA	NA	NA	NA	NA	NA	NA	NA	NA	NA	NA	NA	NA	NA	NA	NA	NA	NA	NA	NA	NA	NA	3.68265	0.00672926	0.000443669	NA	NA	NA	NA	NA	NA
cg11232610	NA	NA	NA	NA	NA	NA	NA	NA	NA	NA	NA	NA	NA	NA	NA	NA	NA	NA	NA	NA	NA	NA	NA	NA	3.78436	0.0349639	0.000332523	NA	NA	NA	NA	NA	NA
cg11243251	4.19872	0.0217004	0.000192935	NA	NA	NA	NA	NA	NA	NA	NA	NA	NA	NA	NA	NA	NA	NA	NA	NA	NA	NA	NA	NA	4.36177	0.0374858	6.28596e-05	NA	NA	NA	NA	NA	NA
cg11253514	NA	NA	NA	NA	NA	NA	NA	NA	NA	NA	NA	NA	NA	NA	NA	NA	NA	NA	NA	NA	NA	NA	NA	NA	3.5869	0.0234208	0.000581073	NA	NA	NA	NA	NA	NA
cg11278506	NA	NA	NA	NA	NA	NA	NA	NA	NA	NA	NA	NA	NA	NA	NA	NA	NA	NA	NA	NA	NA	NA	NA	NA	3.69111	0.0290041	0.000433173	NA	NA	NA	NA	NA	NA
cg11341142	4.15333	0.0309714	0.000219245	NA	NA	NA	NA	NA	NA	NA	NA	NA	NA	NA	NA	NA	NA	NA	NA	NA	NA	NA	NA	NA	NA	NA	NA	NA	NA	NA	NA	NA	NA
cg11342941	NA	NA	NA	NA	NA	NA	NA	NA	NA	NA	NA	NA	NA	NA	NA	NA	NA	NA	NA	NA	NA	NA	NA	NA	4.12397	0.00892662	0.000125497	NA	NA	NA	NA	NA	NA
cg11414345	NA	NA	NA	NA	NA	NA	NA	NA	NA	NA	NA	NA	NA	NA	NA	NA	NA	NA	NA	NA	NA	NA	NA	NA	3.89653	0.0235127	0.000241473	NA	NA	NA	NA	NA	NA
cg11485595	NA	NA	NA	NA	NA	NA	NA	NA	NA	NA	NA	NA	NA	NA	NA	NA	NA	NA	NA	NA	NA	NA	NA	NA	4.27205	0.0050373	8.16584e-05	NA	NA	NA	NA	NA	NA
cg11487526	4.22323	0.0215733	0.000180043	NA	NA	NA	NA	NA	NA	NA	NA	NA	NA	NA	NA	NA	NA	NA	NA	NA	NA	NA	NA	NA	3.87728	0.0110321	0.000255138	NA	NA	NA	NA	NA	NA
cg11499970	NA	NA	NA	NA	NA	NA	NA	NA	NA	NA	NA	NA	NA	NA	NA	NA	NA	NA	NA	NA	NA	NA	NA	NA	3.97067	0.0169558	0.000195237	NA	NA	NA	NA	NA	NA
cg11500797	4.42213	0.0394386	0.000102384	NA	NA	NA	NA	NA	NA	NA	NA	NA	NA	NA	NA	NA	NA	NA	NA	NA	NA	NA	NA	NA	NA	NA	NA	NA	NA	NA	NA	NA	NA
cg11518359	NA	NA	NA	NA	NA	NA	NA	NA	NA	NA	NA	NA	NA	NA	NA	NA	NA	NA	NA	NA	NA	NA	NA	NA	3.56564	0.0389099	0.00061679	NA	NA	NA	NA	NA	NA
cg11518826	NA	NA	NA	NA	NA	NA	NA	NA	NA	NA	NA	NA	NA	NA	NA	NA	NA	NA	NA	NA	NA	NA	NA	NA	4.0643	0.0280509	0.000149108	NA	NA	NA	NA	NA	NA
cg11528328	NA	NA	NA	NA	NA	NA	NA	NA	NA	NA	NA	NA	NA	NA	NA	NA	NA	NA	NA	NA	NA	NA	NA	NA	4.08437	0.0298042	0.000140717	NA	NA	NA	NA	NA	NA
cg11538810	NA	NA	NA	NA	NA	NA	NA	NA	NA	NA	NA	NA	NA	NA	NA	NA	NA	NA	NA	NA	NA	NA	NA	NA	3.77602	0.0336245	0.000340501	NA	NA	NA	NA	NA	NA
cg11540932	4.17781	0.0294309	0.000204648	NA	NA	NA	NA	NA	NA	NA	NA	NA	NA	NA	NA	NA	NA	NA	NA	NA	NA	NA	NA	NA	NA	NA	NA	NA	NA	NA	NA	NA	NA
cg11595545	5.51169	0.00839308	4.30548e-06	NA	NA	NA	NA	NA	NA	NA	NA	NA	NA	NA	NA	NA	NA	NA	NA	NA	NA	NA	NA	NA	4.94571	0.0295554	1.12358e-05	NA	NA	NA	NA	NA	NA
cg11601252	4.5279	0.0139073	7.56719e-05	NA	NA	NA	NA	NA	NA	NA	NA	NA	NA	NA	NA	NA	NA	NA	NA	NA	NA	NA	NA	NA	3.99971	0.0162837	0.000179604	NA	NA	NA	NA	NA	NA
cg11606461	NA	NA	NA	NA	NA	NA	NA	NA	NA	NA	NA	NA	NA	NA	NA	NA	NA	NA	NA	NA	NA	NA	NA	NA	3.73293	0.0213722	0.000384806	NA	NA	NA	NA	NA	NA
cg11630242	NA	NA	NA	NA	NA	NA	NA	NA	NA	NA	NA	NA	NA	NA	NA	NA	NA	NA	NA	NA	NA	NA	NA	NA	4.68001	0.019951	2.46851e-05	NA	NA	NA	NA	NA	NA
cg11640756	4.19006	0.0310586	0.000197702	NA	NA	NA	NA	NA	NA	NA	NA	NA	NA	NA	NA	NA	NA	NA	NA	NA	NA	NA	NA	NA	4.16294	0.040181	0.000112107	NA	NA	NA	NA	NA	NA
cg11692070	NA	NA	NA	NA	NA	NA	NA	NA	NA	NA	NA	NA	NA	NA	NA	NA	NA	NA	NA	NA	NA	NA	NA	NA	3.76435	0.00603279	0.000351982	NA	NA	NA	NA	NA	NA
cg11700824	NA	NA	NA	NA	NA	NA	NA	NA	NA	NA	NA	NA	NA	NA	NA	NA	NA	NA	NA	NA	NA	NA	NA	NA	3.86247	0.0358066	0.000266165	NA	NA	NA	NA	NA	NA
cg11737334	NA	NA	NA	NA	NA	NA	NA	NA	NA	NA	NA	NA	NA	NA	NA	NA	NA	NA	NA	NA	NA	NA	NA	NA	3.65702	0.040166	0.000476973	NA	NA	NA	NA	NA	NA
cg11737742	NA	NA	NA	NA	NA	NA	NA	NA	NA	NA	NA	NA	NA	NA	NA	NA	NA	NA	NA	NA	NA	NA	NA	NA	3.99139	0.018421	0.000183952	NA	NA	NA	NA	NA	NA
cg11753239	NA	NA	NA	NA	NA	NA	NA	NA	NA	NA	NA	NA	NA	NA	NA	NA	NA	NA	NA	NA	NA	NA	NA	NA	4.6767	0.0290578	2.49277e-05	NA	NA	NA	NA	NA	NA
cg11755107	NA	NA	NA	NA	NA	NA	NA	NA	NA	NA	NA	NA	NA	NA	NA	NA	NA	NA	NA	NA	NA	NA	NA	NA	4.3349	0.0124788	6.79899e-05	NA	NA	NA	NA	NA	NA
cg11846466	NA	NA	NA	NA	NA	NA	NA	NA	NA	NA	NA	NA	NA	NA	NA	NA	NA	NA	NA	NA	NA	NA	NA	NA	NA	NA	NA	5.7508	0.0183025	2.46522e-05	NA	NA	NA
cg11891395	5.46113	0.0233796	4.99803e-06	NA	NA	NA	NA	NA	NA	NA	NA	NA	NA	NA	NA	NA	NA	NA	NA	NA	NA	NA	NA	NA	4.84854	0.0281489	1.49929e-05	NA	NA	NA	NA	NA	NA
cg11919577	NA	NA	NA	NA	NA	NA	NA	NA	NA	NA	NA	NA	NA	NA	NA	NA	NA	NA	NA	NA	NA	NA	NA	NA	4.04422	0.0243653	0.000158	NA	NA	NA	NA	NA	NA
cg11928275	NA	NA	NA	NA	NA	NA	NA	NA	NA	NA	NA	NA	NA	NA	NA	NA	NA	NA	NA	NA	NA	NA	NA	NA	3.66904	0.0352037	0.000461052	NA	NA	NA	NA	NA	NA
cg11940285	4.48027	0.0362417	8.67248e-05	NA	NA	NA	NA	NA	NA	NA	NA	NA	NA	NA	NA	NA	NA	NA	NA	NA	NA	NA	NA	NA	4.46488	0.0274477	4.64848e-05	NA	NA	NA	NA	NA	NA
cg11943056	NA	NA	NA	NA	NA	NA	NA	NA	NA	NA	NA	NA	NA	NA	NA	NA	NA	NA	NA	NA	NA	NA	NA	NA	NA	NA	NA	5.77777	0.0267949	2.31574e-05	NA	NA	NA
cg11953272	4.54203	0.0382628	7.26669e-05	NA	NA	NA	NA	NA	NA	NA	NA	NA	NA	NA	NA	NA	NA	NA	NA	NA	NA	NA	NA	NA	4.03411	0.0182166	0.000162669	NA	NA	NA	NA	NA	NA
cg11956825	NA	NA	NA	NA	NA	NA	NA	NA	NA	NA	NA	NA	NA	NA	NA	NA	NA	NA	NA	NA	NA	NA	NA	NA	4.46423	0.0067952	4.65736e-05	NA	NA	NA	NA	NA	NA
cg12002589	NA	NA	NA	NA	NA	NA	NA	NA	NA	NA	NA	NA	NA	NA	NA	NA	NA	NA	NA	NA	NA	NA	NA	NA	4.98259	0.0354019	1.00689e-05	NA	NA	NA	NA	NA	NA
cg12024828	NA	NA	NA	NA	NA	NA	NA	NA	NA	NA	NA	NA	NA	NA	NA	NA	NA	NA	NA	NA	NA	NA	NA	NA	3.94816	0.036715	0.00020827	NA	NA	NA	NA	NA	NA
cg12032713	NA	NA	NA	NA	NA	NA	NA	NA	NA	NA	NA	NA	NA	NA	NA	NA	NA	NA	NA	NA	NA	NA	NA	NA	4.07977	0.0163656	0.000142599	NA	NA	NA	NA	NA	NA
cg12074780	5.58747	0.0265341	3.442e-06	NA	NA	NA	NA	NA	NA	NA	NA	NA	NA	NA	NA	NA	NA	NA	NA	NA	NA	NA	NA	NA	5.20486	0.0096984	5.18967e-06	NA	NA	NA	NA	NA	NA
cg12091936	NA	NA	NA	NA	NA	NA	NA	NA	NA	NA	NA	NA	NA	NA	NA	NA	NA	NA	NA	NA	NA	NA	NA	NA	3.71111	0.0196757	0.00040935	NA	NA	NA	NA	NA	NA
cg12106728	6.09061	0.0430847	7.73041e-07	NA	NA	NA	NA	NA	NA	NA	NA	NA	NA	NA	NA	NA	NA	NA	NA	NA	NA	NA	NA	NA	5.77604	0.0077656	9.34074e-07	NA	NA	NA	NA	NA	NA
cg12117658	4.08679	0.0263936	0.000264267	NA	NA	NA	NA	NA	NA	NA	NA	NA	NA	NA	NA	NA	NA	NA	NA	NA	NA	NA	NA	NA	4.46287	0.0309774	4.67595e-05	NA	NA	NA	NA	NA	NA
cg12162530	NA	NA	NA	NA	NA	NA	NA	NA	NA	NA	NA	NA	NA	NA	NA	NA	NA	NA	NA	NA	NA	NA	NA	NA	3.78394	0.0174241	0.000332924	NA	NA	NA	NA	NA	NA
cg12177220	5.20041	0.0399096	1.07575e-05	NA	NA	NA	NA	NA	NA	NA	NA	NA	NA	NA	NA	NA	NA	NA	NA	NA	NA	NA	NA	NA	4.74433	0.0186476	2.04134e-05	NA	NA	NA	NA	NA	NA
cg12177793	5.00399	0.0131262	1.91015e-05	NA	NA	NA	NA	NA	NA	NA	NA	NA	NA	NA	NA	NA	NA	NA	NA	NA	NA	NA	NA	NA	4.79753	0.00809974	1.74398e-05	NA	NA	NA	NA	NA	NA
cg12182991	NA	NA	NA	NA	NA	NA	NA	NA	NA	NA	NA	NA	NA	NA	NA	NA	NA	NA	NA	NA	NA	NA	NA	NA	5.57431	0.0388763	1.71447e-06	NA	NA	NA	NA	NA	NA
cg12188560	4.11022	0.0231384	0.000247466	NA	NA	NA	NA	NA	NA	NA	NA	NA	NA	NA	NA	NA	NA	NA	NA	NA	NA	NA	NA	NA	3.65022	0.0459164	0.000486204	NA	NA	NA	NA	NA	NA
cg12191938	NA	NA	NA	NA	NA	NA	NA	NA	NA	NA	NA	NA	NA	NA	NA	NA	NA	NA	NA	NA	NA	NA	NA	NA	3.65537	0.0412406	0.000479191	NA	NA	NA	NA	NA	NA
cg12230728	4.08894	0.0452407	0.000262683	NA	NA	NA	NA	NA	NA	NA	NA	NA	NA	NA	NA	NA	NA	NA	NA	NA	NA	NA	NA	NA	3.70162	0.0017492	0.000420486	NA	NA	NA	NA	NA	NA
cg12253437	NA	NA	NA	NA	NA	NA	NA	NA	NA	NA	NA	NA	NA	NA	NA	NA	NA	NA	NA	NA	NA	NA	NA	NA	3.7231	0.0261477	0.000395676	NA	NA	NA	NA	NA	NA
cg12263469	NA	NA	NA	NA	NA	NA	NA	NA	NA	NA	NA	NA	NA	NA	NA	NA	NA	NA	NA	NA	NA	NA	NA	NA	3.89868	0.0448291	0.000239992	NA	NA	NA	NA	NA	NA
cg12291728	4.11372	0.0154872	0.000245046	NA	NA	NA	NA	NA	NA	NA	NA	NA	NA	NA	NA	NA	NA	NA	NA	NA	NA	NA	NA	NA	NA	NA	NA	NA	NA	NA	NA	NA	NA
cg12300382	NA	NA	NA	NA	NA	NA	NA	NA	NA	NA	NA	NA	NA	NA	NA	NA	NA	NA	NA	NA	NA	NA	NA	NA	3.99766	0.0240398	0.000180667	NA	NA	NA	NA	NA	NA
cg12333618	NA	NA	NA	NA	NA	NA	NA	NA	NA	NA	NA	NA	NA	NA	NA	NA	NA	NA	NA	NA	NA	NA	NA	NA	3.7296	0.0108979	0.000388457	NA	NA	NA	NA	NA	NA
cg12336540	5.32146	0.02986	7.54029e-06	NA	NA	NA	NA	NA	NA	NA	NA	NA	NA	NA	NA	NA	NA	NA	NA	NA	NA	NA	NA	NA	NA	NA	NA	NA	NA	NA	NA	NA	NA
cg12350325	NA	NA	NA	NA	NA	NA	NA	NA	NA	NA	NA	NA	NA	NA	NA	NA	NA	NA	NA	NA	NA	NA	NA	NA	3.92509	0.0135927	0.000222513	NA	NA	NA	NA	NA	NA
cg12384572	NA	NA	NA	NA	NA	NA	NA	NA	NA	NA	NA	NA	NA	NA	NA	NA	NA	NA	NA	NA	NA	NA	NA	NA	3.6439	0.0148792	0.000494944	NA	NA	NA	NA	NA	NA
cg12391048	4.38004	0.0240767	0.00011543	NA	NA	NA	NA	NA	NA	NA	NA	NA	NA	NA	NA	NA	NA	NA	NA	NA	NA	NA	NA	NA	NA	NA	NA	NA	NA	NA	NA	NA	NA
cg12457529	4.41712	0.00926584	0.000103858	NA	NA	NA	NA	NA	NA	NA	NA	NA	NA	NA	NA	NA	NA	NA	NA	NA	NA	NA	NA	NA	3.96723	0.0465523	0.000197178	NA	NA	NA	NA	NA	NA
cg12505146	4.30076	0.0359241	0.000144583	NA	NA	NA	NA	NA	NA	NA	NA	NA	NA	NA	NA	NA	NA	NA	NA	NA	NA	NA	NA	NA	NA	NA	NA	NA	NA	NA	NA	NA	NA
cg12536526	4.81848	0.0442695	3.27511e-05	NA	NA	NA	NA	NA	NA	NA	NA	NA	NA	NA	NA	NA	NA	NA	NA	NA	NA	NA	NA	NA	4.9971	0.0250204	9.64354e-06	NA	NA	NA	NA	NA	NA
cg12577850	NA	NA	NA	NA	NA	NA	NA	NA	NA	NA	NA	NA	NA	NA	NA	NA	NA	NA	NA	NA	NA	NA	NA	NA	4.95772	0.00762717	1.08417e-05	NA	NA	NA	NA	NA	NA
cg12593812	NA	NA	NA	NA	NA	NA	NA	NA	NA	NA	NA	NA	NA	NA	NA	NA	NA	NA	NA	NA	NA	NA	NA	NA	3.83454	0.0455804	0.00028825	NA	NA	NA	NA	NA	NA
cg12619165	4.27617	0.0333453	0.000155014	NA	NA	NA	NA	NA	NA	NA	NA	NA	NA	NA	NA	NA	NA	NA	NA	NA	NA	NA	NA	NA	4.35023	0.0497667	6.50134e-05	NA	NA	NA	NA	NA	NA
cg12646754	NA	NA	NA	NA	NA	NA	NA	NA	NA	NA	NA	NA	NA	NA	NA	NA	NA	NA	NA	NA	NA	NA	NA	NA	3.87066	0.00517124	0.000260009	NA	NA	NA	NA	NA	NA
cg12662193	NA	NA	NA	NA	NA	NA	NA	NA	NA	NA	NA	NA	NA	NA	NA	NA	NA	NA	NA	NA	NA	NA	NA	NA	4.34448	0.0117543	6.61142e-05	NA	NA	NA	NA	NA	NA
cg12675870	NA	NA	NA	NA	NA	NA	NA	NA	NA	NA	NA	NA	NA	NA	NA	NA	NA	NA	NA	NA	NA	NA	NA	NA	3.66351	0.0433431	0.000468311	NA	NA	NA	NA	NA	NA
cg12757890	NA	NA	NA	NA	NA	NA	NA	NA	NA	NA	NA	NA	NA	NA	NA	NA	NA	NA	NA	NA	NA	NA	NA	NA	3.7406	0.0394314	0.000376527	NA	NA	NA	NA	NA	NA
cg12775656	NA	NA	NA	NA	NA	NA	NA	NA	NA	NA	NA	NA	NA	NA	NA	NA	NA	NA	NA	NA	NA	NA	NA	NA	4.2228	0.034296	9.42309e-05	NA	NA	NA	NA	NA	NA
cg12791492	4.85893	0.0404655	2.91263e-05	NA	NA	NA	NA	NA	NA	NA	NA	NA	NA	NA	NA	NA	NA	NA	NA	NA	NA	NA	NA	NA	4.29529	0.0164519	7.63123e-05	NA	NA	NA	NA	NA	NA
cg12799885	NA	NA	NA	NA	NA	NA	NA	NA	NA	NA	NA	NA	NA	NA	NA	NA	NA	NA	NA	NA	NA	NA	NA	NA	4.10287	0.0376947	0.000133394	NA	NA	NA	NA	NA	NA
cg12808290	4.38537	0.0120014	0.00011369	NA	NA	NA	NA	NA	NA	NA	NA	NA	NA	NA	NA	NA	NA	NA	NA	NA	NA	NA	NA	NA	NA	NA	NA	NA	NA	NA	NA	NA	NA
cg12817389	NA	NA	NA	NA	NA	NA	NA	NA	NA	NA	NA	NA	NA	NA	NA	NA	NA	NA	NA	NA	NA	NA	NA	NA	3.87009	0.0107353	0.000260437	NA	NA	NA	NA	NA	NA
cg12833207	NA	NA	NA	NA	NA	NA	NA	NA	NA	NA	NA	NA	NA	NA	NA	NA	NA	NA	NA	NA	NA	5.05697	1.56891e-05	7.22736e-06	NA	NA	NA	NA	NA	NA	NA	NA	NA
cg12879143	NA	NA	NA	NA	NA	NA	NA	NA	NA	NA	NA	NA	NA	NA	NA	NA	NA	NA	NA	NA	NA	NA	NA	NA	NA	NA	NA	5.63059	0.0348827	3.25712e-05	NA	NA	NA
cg12924430	4.41368	0.0379695	0.000104882	NA	NA	NA	NA	NA	NA	NA	NA	NA	NA	NA	NA	NA	NA	NA	NA	NA	NA	NA	NA	NA	NA	NA	NA	NA	NA	NA	NA	NA	NA
cg12928379	NA	NA	NA	NA	NA	NA	NA	NA	NA	NA	NA	NA	NA	NA	NA	NA	NA	NA	NA	NA	NA	NA	NA	NA	3.57452	0.0365957	0.000601618	NA	NA	NA	NA	NA	NA
cg12933431	NA	NA	NA	NA	NA	NA	NA	NA	NA	NA	NA	NA	NA	NA	NA	NA	NA	NA	NA	NA	NA	NA	NA	NA	4.07135	0.0394453	0.000146109	NA	NA	NA	NA	NA	NA
cg12942328	5.64721	0.0178914	2.88446e-06	NA	NA	NA	NA	NA	NA	NA	NA	NA	NA	NA	NA	NA	NA	NA	NA	NA	NA	NA	NA	NA	5.62676	0.0121306	1.46425e-06	NA	NA	NA	NA	NA	NA
cg12965553	4.4829	0.031929	8.60729e-05	NA	NA	NA	NA	NA	NA	NA	NA	NA	NA	NA	NA	NA	NA	NA	NA	NA	NA	NA	NA	NA	3.71101	0.00824879	0.00040946	NA	NA	NA	NA	NA	NA
cg12974832	5.06765	0.0284997	1.58633e-05	NA	NA	NA	NA	NA	NA	NA	NA	NA	NA	NA	NA	NA	NA	NA	NA	NA	NA	NA	NA	NA	NA	NA	NA	NA	NA	NA	NA	NA	NA
cg12985929	4.98976	0.0417259	1.99101e-05	NA	NA	NA	NA	NA	NA	NA	NA	NA	NA	NA	NA	NA	NA	NA	NA	NA	NA	NA	NA	NA	NA	NA	NA	NA	NA	NA	NA	NA	NA
cg13031251	NA	NA	NA	NA	NA	NA	5.875	0.0281433	1.84785e-05	NA	NA	NA	NA	NA	NA	NA	NA	NA	NA	NA	NA	NA	NA	NA	NA	NA	NA	NA	NA	NA	NA	NA	NA
cg13033070	NA	NA	NA	NA	NA	NA	NA	NA	NA	NA	NA	NA	NA	NA	NA	NA	NA	NA	NA	NA	NA	NA	NA	NA	5.28948	0.0405393	4.02933e-06	NA	NA	NA	NA	NA	NA
cg13051263	NA	NA	NA	NA	NA	NA	NA	NA	NA	NA	NA	NA	NA	NA	NA	NA	NA	NA	NA	NA	NA	NA	NA	NA	3.74133	0.00650662	0.000375744	NA	NA	NA	NA	NA	NA
cg13066043	4.94576	0.0265776	2.26316e-05	NA	NA	NA	NA	NA	NA	NA	NA	NA	NA	NA	NA	NA	NA	NA	NA	NA	NA	NA	NA	NA	4.33573	0.0338245	6.78252e-05	NA	NA	NA	NA	NA	NA
cg13077262	4.36512	0.0256331	0.000120434	NA	NA	NA	NA	NA	NA	NA	NA	NA	NA	NA	NA	NA	NA	NA	NA	NA	NA	NA	NA	NA	4.40934	0.0118163	5.46973e-05	NA	NA	NA	NA	NA	NA
cg13137176	NA	NA	NA	NA	NA	NA	NA	NA	NA	NA	NA	NA	NA	NA	NA	NA	NA	NA	NA	NA	NA	NA	NA	NA	3.79352	0.0345214	0.000323978	NA	NA	NA	NA	NA	NA
cg13186228	4.95235	0.0177833	2.22015e-05	NA	NA	NA	NA	NA	NA	NA	NA	NA	NA	NA	NA	NA	NA	NA	NA	NA	NA	NA	NA	NA	4.3974	0.0306291	5.66418e-05	NA	NA	NA	NA	NA	NA
cg13208704	5.92405	0.032162	1.26899e-06	NA	NA	NA	NA	NA	NA	NA	NA	NA	NA	NA	NA	NA	NA	NA	NA	NA	NA	NA	NA	NA	5.34478	0.00869852	3.41438e-06	NA	NA	NA	NA	NA	NA
cg13211683	NA	NA	NA	NA	NA	NA	NA	NA	NA	NA	NA	NA	NA	NA	NA	NA	NA	NA	NA	NA	NA	NA	NA	NA	3.65802	0.00397985	0.000475619	NA	NA	NA	NA	NA	NA
cg13311805	NA	NA	NA	NA	NA	NA	NA	NA	NA	NA	NA	NA	NA	NA	NA	NA	NA	NA	NA	NA	NA	5.31765	0.0342275	3.3106e-06	NA	NA	NA	NA	NA	NA	NA	NA	NA
cg13345683	NA	NA	NA	NA	NA	NA	NA	NA	NA	NA	NA	NA	NA	NA	NA	NA	NA	NA	NA	NA	NA	NA	NA	NA	3.58068	0.0365819	0.000591307	NA	NA	NA	NA	NA	NA
cg13391116	NA	NA	NA	NA	NA	NA	NA	NA	NA	NA	NA	NA	NA	NA	NA	NA	NA	NA	NA	NA	NA	NA	NA	NA	5.37115	0.0168585	3.15492e-06	NA	NA	NA	NA	NA	NA
cg13400018	NA	NA	NA	NA	NA	NA	NA	NA	NA	NA	NA	NA	NA	NA	NA	NA	NA	NA	NA	NA	NA	NA	NA	NA	3.67852	0.0409785	0.000448878	NA	NA	NA	NA	NA	NA
cg13405293	NA	NA	NA	NA	NA	NA	NA	NA	NA	NA	NA	NA	NA	NA	NA	NA	NA	NA	NA	NA	NA	NA	NA	NA	3.71137	0.00975351	0.000409038	NA	NA	NA	NA	NA	NA
cg13415795	NA	NA	NA	NA	NA	NA	NA	NA	NA	NA	NA	NA	NA	NA	NA	NA	NA	NA	NA	NA	NA	NA	NA	NA	3.61253	0.0451722	0.000540665	NA	NA	NA	NA	NA	NA
cg13421439	4.60789	0.0100242	6.01481e-05	NA	NA	NA	NA	NA	NA	NA	NA	NA	NA	NA	NA	NA	NA	NA	NA	NA	NA	NA	NA	NA	NA	NA	NA	NA	NA	NA	NA	NA	NA
cg13432744	NA	NA	NA	NA	NA	NA	NA	NA	NA	NA	NA	NA	NA	NA	NA	NA	NA	NA	NA	NA	NA	NA	NA	NA	5.02634	0.0245951	8.83957e-06	NA	NA	NA	NA	NA	NA
cg13455410	NA	NA	NA	NA	NA	NA	NA	NA	NA	NA	NA	NA	NA	NA	NA	NA	NA	NA	NA	NA	NA	NA	NA	NA	3.91033	0.0115782	0.000232117	NA	NA	NA	NA	NA	NA
cg13458407	NA	NA	NA	NA	NA	NA	NA	NA	NA	NA	NA	NA	NA	NA	NA	NA	NA	NA	NA	NA	NA	NA	NA	NA	3.81101	0.0492732	0.000308243	NA	NA	NA	NA	NA	NA
cg13461390	NA	NA	NA	NA	NA	NA	NA	NA	NA	NA	NA	NA	NA	NA	NA	NA	NA	NA	NA	NA	NA	NA	NA	NA	3.82666	0.0269387	0.000294797	NA	NA	NA	NA	NA	NA
cg13496041	4.6972	0.0121967	4.65076e-05	NA	NA	NA	NA	NA	NA	NA	NA	NA	NA	NA	NA	NA	NA	NA	NA	NA	NA	NA	NA	NA	4.5404	0.0117694	3.72421e-05	NA	NA	NA	NA	NA	NA
cg13519595	NA	NA	NA	NA	NA	NA	NA	NA	NA	NA	NA	NA	NA	NA	NA	NA	NA	NA	NA	NA	NA	NA	NA	NA	3.58712	0.0495372	0.000580709	NA	NA	NA	NA	NA	NA
cg13538063	NA	NA	NA	NA	NA	NA	NA	NA	NA	NA	NA	NA	NA	NA	NA	NA	NA	NA	NA	NA	NA	NA	NA	NA	4.36521	0.0247803	6.22299e-05	NA	NA	NA	NA	NA	NA
cg13541456	NA	NA	NA	NA	NA	NA	NA	NA	NA	NA	NA	NA	NA	NA	NA	NA	NA	NA	NA	NA	NA	NA	NA	NA	4.12247	0.0415111	0.000126043	NA	NA	NA	NA	NA	NA
cg13634242	5.13233	0.0284207	1.31307e-05	NA	NA	NA	NA	NA	NA	NA	NA	NA	NA	NA	NA	NA	NA	NA	NA	NA	NA	NA	NA	NA	4.66008	0.0371572	2.61805e-05	NA	NA	NA	NA	NA	NA
cg13648318	NA	NA	NA	NA	NA	NA	NA	NA	NA	NA	NA	NA	NA	NA	NA	NA	NA	NA	NA	NA	NA	NA	NA	NA	3.83363	0.0145536	0.000288997	NA	NA	NA	NA	NA	NA
cg13689411	4.43974	0.00499188	9.73695e-05	NA	NA	NA	NA	NA	NA	NA	NA	NA	NA	NA	NA	NA	NA	NA	NA	NA	NA	NA	NA	NA	3.91064	0.0396991	0.000231914	NA	NA	NA	NA	NA	NA
cg13704531	4.47652	0.0304101	8.76577e-05	NA	NA	NA	NA	NA	NA	NA	NA	NA	NA	NA	NA	NA	NA	NA	NA	NA	NA	NA	NA	NA	NA	NA	NA	NA	NA	NA	NA	NA	NA
cg13706395	NA	NA	NA	NA	NA	NA	NA	NA	NA	NA	NA	NA	NA	NA	NA	NA	NA	NA	NA	NA	NA	NA	NA	NA	3.83022	0.0402146	0.000291823	NA	NA	NA	NA	NA	NA
cg13722431	NA	NA	NA	NA	NA	NA	NA	NA	NA	NA	NA	NA	NA	NA	NA	NA	NA	NA	NA	NA	NA	NA	NA	NA	3.72934	0.0186409	0.000388738	NA	NA	NA	NA	NA	NA
cg13786163	4.81934	0.0249267	3.26696e-05	NA	NA	NA	NA	NA	NA	NA	NA	NA	NA	NA	NA	NA	NA	NA	NA	NA	NA	NA	NA	NA	NA	NA	NA	NA	NA	NA	NA	NA	NA
cg13786863	5.57075	0.0393691	3.61638e-06	NA	NA	NA	NA	NA	NA	NA	NA	NA	NA	NA	NA	NA	NA	NA	NA	NA	NA	NA	NA	NA	NA	NA	NA	NA	NA	NA	NA	NA	NA
cg13828227	5.4954	0.0374323	4.51748e-06	NA	NA	NA	NA	NA	NA	NA	NA	NA	NA	NA	NA	NA	NA	NA	NA	NA	NA	NA	NA	NA	NA	NA	NA	NA	NA	NA	NA	NA	NA
cg13829680	4.49191	0.0286256	8.38842e-05	NA	NA	NA	NA	NA	NA	NA	NA	NA	NA	NA	NA	NA	NA	NA	NA	NA	NA	NA	NA	NA	NA	NA	NA	NA	NA	NA	NA	NA	NA
cg13834146	NA	NA	NA	NA	NA	NA	NA	NA	NA	NA	NA	NA	NA	NA	NA	NA	NA	NA	NA	NA	NA	NA	NA	NA	3.90115	0.00628994	0.000238302	NA	NA	NA	NA	NA	NA
cg13844899	NA	NA	NA	NA	NA	NA	NA	NA	NA	NA	NA	NA	NA	NA	NA	NA	NA	NA	NA	NA	NA	NA	NA	NA	3.74491	0.0319278	0.00037195	NA	NA	NA	NA	NA	NA
cg13845094	4.2134	0.0315438	0.000185112	NA	NA	NA	NA	NA	NA	NA	NA	NA	NA	NA	NA	NA	NA	NA	NA	NA	NA	NA	NA	NA	3.89607	0.00279186	0.000241789	NA	NA	NA	NA	NA	NA
cg13892928	4.12953	0.020905	0.000234413	NA	NA	NA	NA	NA	NA	NA	NA	NA	NA	NA	NA	NA	NA	NA	NA	NA	NA	NA	NA	NA	4.30894	0.0206444	7.33375e-05	NA	NA	NA	NA	NA	NA
cg13915179	NA	NA	NA	NA	NA	NA	NA	NA	NA	NA	NA	NA	NA	NA	NA	NA	NA	NA	NA	NA	NA	NA	NA	NA	3.75967	0.0353408	0.000356691	NA	NA	NA	NA	NA	NA
cg13923648	NA	NA	NA	NA	NA	NA	NA	NA	NA	NA	NA	NA	NA	NA	NA	NA	NA	NA	NA	NA	NA	NA	NA	NA	3.92261	0.00483753	0.0002241	NA	NA	NA	NA	NA	NA
cg13935741	NA	NA	NA	NA	NA	NA	NA	NA	NA	NA	NA	NA	NA	NA	NA	NA	NA	NA	NA	NA	NA	NA	NA	NA	4.02779	0.0355453	0.000165658	NA	NA	NA	NA	NA	NA
cg13954531	NA	NA	NA	NA	NA	NA	NA	NA	NA	NA	NA	NA	NA	NA	NA	NA	NA	NA	NA	NA	NA	NA	NA	NA	6.33488	0.0277546	1.72529e-07	NA	NA	NA	NA	NA	NA
cg13958426	4.6233	0.0203971	5.75414e-05	NA	NA	NA	NA	NA	NA	NA	NA	NA	NA	NA	NA	NA	NA	NA	NA	NA	NA	NA	NA	NA	4.28262	0.0101902	7.91824e-05	NA	NA	NA	NA	NA	NA
cg13990351	NA	NA	NA	NA	NA	NA	NA	NA	NA	NA	NA	NA	NA	NA	NA	NA	NA	NA	NA	NA	NA	NA	NA	NA	4.68131	0.0135187	2.45906e-05	NA	NA	NA	NA	NA	NA
cg14032025	4.93529	0.017848	2.33314e-05	NA	NA	NA	NA	NA	NA	NA	NA	NA	NA	NA	NA	NA	NA	NA	NA	NA	NA	NA	NA	NA	4.38443	0.00165848	5.88308e-05	NA	NA	NA	NA	NA	NA
cg14067873	4.18276	0.025714	0.000201813	NA	NA	NA	NA	NA	NA	NA	NA	NA	NA	NA	NA	NA	NA	NA	NA	NA	NA	NA	NA	NA	4.36552	0.00842554	6.21746e-05	NA	NA	NA	NA	NA	NA
cg14089474	NA	NA	NA	NA	NA	NA	NA	NA	NA	NA	NA	NA	NA	NA	NA	NA	NA	NA	NA	NA	NA	NA	NA	NA	4.02966	0.0317067	0.000164768	NA	NA	NA	NA	NA	NA
cg14163444	4.5686	0.0106983	6.73352e-05	NA	NA	NA	NA	NA	NA	NA	NA	NA	NA	NA	NA	NA	NA	NA	NA	NA	NA	NA	NA	NA	4.68872	0.0212987	2.40586e-05	NA	NA	NA	NA	NA	NA
cg14178748	NA	NA	NA	NA	NA	NA	NA	NA	NA	NA	NA	NA	NA	NA	NA	NA	NA	NA	NA	NA	NA	NA	NA	NA	4.19132	0.0214804	0.00010325	NA	NA	NA	NA	NA	NA
cg14181111	NA	NA	NA	NA	NA	NA	NA	NA	NA	NA	NA	NA	NA	NA	NA	NA	NA	NA	NA	NA	NA	NA	NA	NA	4.24205	0.0488641	8.91057e-05	NA	NA	NA	NA	NA	NA
cg14186641	NA	NA	NA	NA	NA	NA	NA	NA	NA	NA	NA	NA	NA	NA	NA	NA	NA	NA	NA	NA	NA	NA	NA	NA	3.63222	0.021216	0.000511517	NA	NA	NA	NA	NA	NA
cg14193007	4.16067	0.0487796	0.000214764	NA	NA	NA	NA	NA	NA	NA	NA	NA	NA	NA	NA	NA	NA	NA	NA	NA	NA	NA	NA	NA	NA	NA	NA	NA	NA	NA	NA	NA	NA
cg14196225	6.90141	0.0251794	6.84063e-08	NA	NA	NA	NA	NA	NA	NA	NA	NA	NA	NA	NA	NA	NA	NA	NA	NA	NA	NA	NA	NA	NA	NA	NA	NA	NA	NA	NA	NA	NA
cg14202338	4.84201	0.0494403	3.05918e-05	NA	NA	NA	NA	NA	NA	NA	NA	NA	NA	NA	NA	NA	NA	NA	NA	NA	NA	NA	NA	NA	4.04852	0.0282338	0.000156051	NA	NA	NA	NA	NA	NA
cg14202783	4.09741	0.0192305	0.000256521	NA	NA	NA	NA	NA	NA	NA	NA	NA	NA	NA	NA	NA	NA	NA	NA	NA	NA	NA	NA	NA	NA	NA	NA	NA	NA	NA	NA	NA	NA
cg14263942	4.96765	0.0306975	2.12344e-05	NA	NA	NA	NA	NA	NA	NA	NA	NA	NA	NA	NA	NA	NA	NA	NA	NA	NA	NA	NA	NA	NA	NA	NA	NA	NA	NA	NA	NA	NA
cg14270348	NA	NA	NA	NA	NA	NA	NA	NA	NA	NA	NA	NA	NA	NA	NA	NA	NA	NA	NA	NA	NA	NA	NA	NA	4.6954	0.0184596	2.35886e-05	NA	NA	NA	NA	NA	NA
cg14273822	NA	NA	NA	NA	NA	NA	NA	NA	NA	NA	NA	NA	NA	NA	NA	NA	NA	NA	NA	NA	NA	NA	NA	NA	3.84459	0.040713	0.000280099	NA	NA	NA	NA	NA	NA
cg14283380	NA	NA	NA	NA	NA	NA	NA	NA	NA	NA	NA	NA	NA	NA	NA	NA	NA	NA	NA	NA	NA	NA	NA	NA	4.18188	0.0429896	0.000106117	NA	NA	NA	NA	NA	NA
cg14283569	5.30722	0.0171891	7.86255e-06	NA	NA	NA	NA	NA	NA	NA	NA	NA	NA	NA	NA	NA	NA	NA	NA	NA	NA	NA	NA	NA	4.33484	0.000764864	6.8e-05	NA	NA	NA	NA	NA	NA
cg14303122	NA	NA	NA	NA	NA	NA	NA	NA	NA	NA	NA	NA	NA	NA	NA	NA	NA	NA	NA	NA	NA	NA	NA	NA	3.64708	0.0447583	0.000490533	NA	NA	NA	NA	NA	NA
cg14308479	4.66072	0.025598	5.16642e-05	NA	NA	NA	NA	NA	NA	NA	NA	NA	NA	NA	NA	NA	NA	NA	NA	NA	NA	NA	NA	NA	4.25997	0.040187	8.45785e-05	NA	NA	NA	NA	NA	NA
cg14311811	NA	NA	NA	NA	NA	NA	NA	NA	NA	NA	NA	NA	NA	NA	NA	NA	NA	NA	NA	NA	NA	NA	NA	NA	3.7169	0.00609805	0.000402689	NA	NA	NA	NA	NA	NA
cg14370628	NA	NA	NA	NA	NA	NA	NA	NA	NA	NA	NA	NA	NA	NA	NA	NA	NA	NA	NA	NA	NA	NA	NA	NA	3.81723	0.0304901	0.000302827	NA	NA	NA	NA	NA	NA
cg14392031	NA	NA	NA	NA	NA	NA	NA	NA	NA	NA	NA	NA	NA	NA	NA	NA	NA	NA	NA	NA	NA	NA	NA	NA	4.488	0.00785208	4.34371e-05	NA	NA	NA	NA	NA	NA
cg14399851	NA	NA	NA	NA	NA	NA	NA	NA	NA	NA	NA	NA	NA	NA	NA	NA	NA	NA	NA	NA	NA	NA	NA	NA	3.94444	0.00976895	0.0002105	NA	NA	NA	NA	NA	NA
cg14418802	4.51766	0.0106554	7.7923e-05	NA	NA	NA	NA	NA	NA	NA	NA	NA	NA	NA	NA	NA	NA	NA	NA	NA	NA	NA	NA	NA	NA	NA	NA	NA	NA	NA	NA	NA	NA
cg14470978	4.55649	0.0389945	6.97148e-05	NA	NA	NA	NA	NA	NA	NA	NA	NA	NA	NA	NA	NA	NA	NA	NA	NA	NA	NA	NA	NA	NA	NA	NA	NA	NA	NA	NA	NA	NA
cg14479889	4.17964	0.03067	0.000203596	NA	NA	NA	NA	NA	NA	NA	NA	NA	NA	NA	NA	NA	NA	NA	NA	NA	NA	NA	NA	NA	3.60207	0.0499687	0.000556817	NA	NA	NA	NA	NA	NA
cg14489594	NA	NA	NA	NA	NA	NA	NA	NA	NA	NA	NA	NA	NA	NA	NA	NA	NA	NA	NA	NA	NA	NA	NA	NA	4.68738	0.0102894	2.41538e-05	NA	NA	NA	NA	NA	NA
cg14551562	NA	NA	NA	NA	NA	NA	NA	NA	NA	NA	NA	NA	NA	NA	NA	NA	NA	NA	NA	NA	NA	NA	NA	NA	4.40165	0.0322825	5.5942e-05	NA	NA	NA	NA	NA	NA
cg14552947	4.09648	0.0155473	0.000257191	NA	NA	NA	NA	NA	NA	NA	NA	NA	NA	NA	NA	NA	NA	NA	NA	NA	NA	NA	NA	NA	4.26697	0.0225069	8.2873e-05	NA	NA	NA	NA	NA	NA
cg14553740	4.12281	0.0286079	0.000238877	NA	NA	NA	NA	NA	NA	NA	NA	NA	NA	NA	NA	NA	NA	NA	NA	NA	NA	NA	NA	NA	NA	NA	NA	NA	NA	NA	NA	NA	NA
cg14555045	NA	NA	NA	NA	NA	NA	NA	NA	NA	NA	NA	NA	NA	NA	NA	NA	NA	NA	NA	NA	NA	NA	NA	NA	3.5756	0.0330235	0.000599796	NA	NA	NA	NA	NA	NA
cg14574369	NA	NA	NA	NA	NA	NA	NA	NA	NA	NA	NA	NA	NA	NA	NA	NA	NA	NA	NA	NA	NA	NA	NA	NA	4.4532	0.00300051	4.81046e-05	NA	NA	NA	NA	NA	NA
cg14578894	4.22407	0.0387627	0.000179617	NA	NA	NA	NA	NA	NA	NA	NA	NA	NA	NA	NA	NA	NA	NA	NA	NA	NA	NA	NA	NA	3.6777	0.0478513	0.000449916	NA	NA	NA	NA	NA	NA
cg14592933	NA	NA	NA	NA	NA	NA	NA	NA	NA	NA	NA	NA	NA	NA	NA	NA	NA	NA	NA	NA	NA	NA	NA	NA	3.73089	0.0431221	0.000387037	NA	NA	NA	NA	NA	NA
cg14621217	NA	NA	NA	NA	NA	NA	NA	NA	NA	NA	NA	NA	NA	NA	NA	NA	NA	NA	NA	NA	NA	NA	NA	NA	3.67857	0.0298699	0.000448811	NA	NA	NA	NA	NA	NA
cg14652638	4.90506	0.0201046	2.54748e-05	NA	NA	NA	NA	NA	NA	NA	NA	NA	NA	NA	NA	NA	NA	NA	NA	NA	NA	NA	NA	NA	NA	NA	NA	NA	NA	NA	NA	NA	NA
cg14652773	NA	NA	NA	NA	NA	NA	NA	NA	NA	NA	NA	NA	NA	NA	NA	NA	NA	NA	NA	NA	NA	NA	NA	NA	3.7968	0.0402751	0.000320966	NA	NA	NA	NA	NA	NA
cg14657834	4.58082	0.0308138	6.50135e-05	NA	NA	NA	NA	NA	NA	NA	NA	NA	NA	NA	NA	NA	NA	NA	NA	NA	NA	NA	NA	NA	4.67574	0.0306356	2.4998e-05	NA	NA	NA	NA	NA	NA
cg14676825	NA	NA	NA	NA	NA	NA	NA	NA	NA	NA	NA	NA	NA	NA	NA	NA	NA	NA	NA	NA	NA	NA	NA	NA	3.62309	0.0416944	0.000524828	NA	NA	NA	NA	NA	NA
cg14739039	NA	NA	NA	NA	NA	NA	NA	NA	NA	NA	NA	NA	NA	NA	NA	NA	NA	NA	NA	NA	NA	NA	NA	NA	3.92595	0.0319322	0.000221965	NA	NA	NA	NA	NA	NA
cg14741474	NA	NA	NA	NA	NA	NA	NA	NA	NA	NA	NA	NA	NA	NA	NA	NA	NA	NA	NA	NA	NA	NA	NA	NA	4.03635	0.0262181	0.000161622	NA	NA	NA	NA	NA	NA
cg14768087	NA	NA	NA	NA	NA	NA	NA	NA	NA	NA	NA	NA	NA	NA	NA	NA	NA	NA	NA	NA	NA	NA	NA	NA	4.72598	0.0351145	2.15511e-05	NA	NA	NA	NA	NA	NA
cg14792081	NA	NA	NA	NA	NA	NA	NA	NA	NA	NA	NA	NA	NA	NA	NA	NA	NA	NA	NA	NA	NA	NA	NA	NA	4.67751	0.00345931	2.48682e-05	NA	NA	NA	NA	NA	NA
cg14796305	NA	NA	NA	NA	NA	NA	NA	NA	NA	NA	NA	NA	NA	NA	NA	NA	NA	NA	NA	NA	NA	NA	NA	NA	4.01646	0.0243894	0.000171151	NA	NA	NA	NA	NA	NA
cg14798653	NA	NA	NA	NA	NA	NA	NA	NA	NA	NA	NA	NA	NA	NA	NA	NA	NA	NA	NA	NA	NA	NA	NA	NA	4.7487	0.0309008	2.01512e-05	NA	NA	NA	NA	NA	NA
cg14801518	NA	NA	NA	NA	NA	NA	5.92681	0.0222453	1.63832e-05	NA	NA	NA	NA	NA	NA	NA	NA	NA	NA	NA	NA	NA	NA	NA	NA	NA	NA	NA	NA	NA	NA	NA	NA
cg14844588	4.11344	0.0307157	0.000245239	NA	NA	NA	NA	NA	NA	NA	NA	NA	NA	NA	NA	NA	NA	NA	NA	NA	NA	NA	NA	NA	NA	NA	NA	NA	NA	NA	NA	NA	NA
cg14881618	NA	NA	NA	NA	NA	NA	NA	NA	NA	NA	NA	NA	NA	NA	NA	NA	NA	NA	NA	NA	NA	NA	NA	NA	4.10547	0.0145699	0.000132395	NA	NA	NA	NA	NA	NA
cg14898623	4.32528	0.0393705	0.000134869	NA	NA	NA	NA	NA	NA	NA	NA	NA	NA	NA	NA	NA	NA	NA	NA	NA	NA	NA	NA	NA	3.68267	0.0318213	0.000443634	NA	NA	NA	NA	NA	NA
cg14914046	4.21904	0.0172418	0.000182185	NA	NA	NA	NA	NA	NA	NA	NA	NA	NA	NA	NA	NA	NA	NA	NA	NA	NA	NA	NA	NA	4.41218	0.0111999	5.4244e-05	NA	NA	NA	NA	NA	NA
cg14932016	NA	NA	NA	NA	NA	NA	NA	NA	NA	NA	NA	NA	NA	NA	NA	NA	NA	NA	NA	NA	NA	NA	NA	NA	3.60537	0.00859822	0.000551677	NA	NA	NA	NA	NA	NA
cg14947429	NA	NA	NA	NA	NA	NA	NA	NA	NA	NA	NA	NA	NA	NA	NA	NA	NA	NA	NA	NA	NA	NA	NA	NA	4.28228	0.00732148	7.92615e-05	NA	NA	NA	NA	NA	NA
cg14993712	NA	NA	NA	NA	NA	NA	NA	NA	NA	NA	NA	NA	NA	NA	NA	NA	NA	NA	NA	NA	NA	NA	NA	NA	4.72724	0.0465791	2.14712e-05	NA	NA	NA	NA	NA	NA
cg15026277	NA	NA	NA	NA	NA	NA	NA	NA	NA	NA	NA	NA	NA	NA	NA	NA	NA	NA	NA	NA	NA	NA	NA	NA	3.96973	0.0126323	0.000195764	NA	NA	NA	NA	NA	NA
cg15044248	NA	NA	NA	NA	NA	NA	NA	NA	NA	NA	NA	NA	NA	NA	NA	NA	NA	NA	NA	NA	NA	NA	NA	NA	3.75748	0.0429265	0.000358921	NA	NA	NA	NA	NA	NA
cg15071854	NA	NA	NA	NA	NA	NA	NA	NA	NA	NA	NA	NA	NA	NA	NA	NA	NA	NA	NA	NA	NA	NA	NA	NA	3.8111	0.0115641	0.000308161	NA	NA	NA	NA	NA	NA
cg15083233	NA	NA	NA	NA	NA	NA	NA	NA	NA	NA	NA	NA	NA	NA	NA	NA	NA	NA	NA	NA	NA	NA	NA	NA	3.84187	0.0288455	0.000282285	NA	NA	NA	NA	NA	NA
cg15097762	NA	NA	NA	NA	NA	NA	NA	NA	NA	NA	NA	NA	NA	NA	NA	NA	NA	NA	NA	NA	NA	NA	NA	NA	3.75781	0.0255133	0.000358578	NA	NA	NA	NA	NA	NA
cg15104644	4.14428	0.0160742	0.000224892	NA	NA	NA	NA	NA	NA	NA	NA	NA	NA	NA	NA	NA	NA	NA	NA	NA	NA	NA	NA	NA	3.57438	0.0325857	0.000601849	NA	NA	NA	NA	NA	NA
cg15120732	4.05931	0.0403632	0.000285401	NA	NA	NA	NA	NA	NA	NA	NA	NA	NA	NA	NA	NA	NA	NA	NA	NA	NA	NA	NA	NA	NA	NA	NA	NA	NA	NA	NA	NA	NA
cg15126544	4.40519	0.048346	0.000107451	NA	NA	NA	NA	NA	NA	NA	NA	NA	NA	NA	NA	NA	NA	NA	NA	NA	NA	NA	NA	NA	3.64281	0.00207375	0.000496478	NA	NA	NA	NA	NA	NA
cg15127227	4.31949	0.0443816	0.000137104	NA	NA	NA	NA	NA	NA	NA	NA	NA	NA	NA	NA	NA	NA	NA	NA	NA	NA	NA	NA	NA	NA	NA	NA	NA	NA	NA	NA	NA	NA
cg15147516	NA	NA	NA	NA	NA	NA	NA	NA	NA	NA	NA	NA	NA	NA	NA	NA	NA	NA	NA	NA	NA	NA	NA	NA	3.92011	0.0326635	0.000225706	NA	NA	NA	NA	NA	NA
cg15158924	NA	NA	NA	NA	NA	NA	NA	NA	NA	NA	NA	NA	NA	NA	NA	NA	NA	NA	NA	NA	NA	NA	NA	NA	3.57575	0.0200478	0.000599542	NA	NA	NA	NA	NA	NA
cg15187113	NA	NA	NA	NA	NA	NA	NA	NA	NA	NA	NA	NA	NA	NA	NA	NA	NA	NA	NA	NA	NA	NA	NA	NA	4.47341	0.0165572	4.53368e-05	NA	NA	NA	NA	NA	NA
cg15198000	NA	NA	NA	NA	NA	NA	NA	NA	NA	NA	NA	NA	NA	NA	NA	NA	NA	NA	NA	NA	NA	NA	NA	NA	4.30122	0.0283197	7.50057e-05	NA	NA	NA	NA	NA	NA
cg15221831	6.01019	0.0385324	9.82176e-07	NA	NA	NA	NA	NA	NA	NA	NA	NA	NA	NA	NA	NA	NA	NA	NA	NA	NA	NA	NA	NA	NA	NA	NA	NA	NA	NA	NA	NA	NA
cg15241633	NA	NA	NA	NA	NA	NA	NA	NA	NA	NA	NA	NA	NA	NA	NA	NA	NA	NA	NA	NA	NA	NA	NA	NA	3.62855	0.0272798	0.000516822	NA	NA	NA	NA	NA	NA
cg15247144	NA	NA	NA	NA	NA	NA	NA	NA	NA	NA	NA	NA	NA	NA	NA	NA	NA	NA	NA	NA	NA	NA	NA	NA	4.64152	0.025398	2.7654e-05	NA	NA	NA	NA	NA	NA
cg15273468	NA	NA	NA	NA	NA	NA	NA	NA	NA	NA	NA	NA	NA	NA	NA	NA	NA	NA	NA	NA	NA	NA	NA	NA	3.69253	0.0230939	0.000431442	NA	NA	NA	NA	NA	NA
cg15278262	NA	NA	NA	NA	NA	NA	NA	NA	NA	NA	NA	NA	NA	NA	NA	NA	NA	NA	NA	NA	NA	NA	NA	NA	3.62626	0.0493892	0.000520172	NA	NA	NA	NA	NA	NA
cg15279308	4.8229	0.0159378	3.23345e-05	NA	NA	NA	NA	NA	NA	NA	NA	NA	NA	NA	NA	NA	NA	NA	NA	NA	NA	NA	NA	NA	4.70667	0.011717	2.28163e-05	NA	NA	NA	NA	NA	NA
cg15313226	4.76286	0.0367505	3.84725e-05	NA	NA	NA	NA	NA	NA	NA	NA	NA	NA	NA	NA	NA	NA	NA	NA	NA	NA	NA	NA	NA	4.59659	0.0191239	3.15676e-05	NA	NA	NA	NA	NA	NA
cg15316660	5.30639	0.0265189	7.88195e-06	NA	NA	NA	NA	NA	NA	NA	NA	NA	NA	NA	NA	NA	NA	NA	NA	NA	NA	NA	NA	NA	4.36887	0.0211365	6.15686e-05	NA	NA	NA	NA	NA	NA
cg15375469	NA	NA	NA	NA	NA	NA	NA	NA	NA	NA	NA	NA	NA	NA	NA	NA	NA	NA	NA	NA	NA	NA	NA	NA	3.83074	0.0404241	0.000291389	NA	NA	NA	NA	NA	NA
cg15386964	NA	NA	NA	NA	NA	NA	NA	NA	NA	NA	NA	NA	NA	NA	NA	NA	NA	NA	NA	NA	NA	NA	NA	NA	NA	NA	NA	6.09036	0.0221657	1.12002e-05	NA	NA	NA
cg15414638	4.54151	0.0338782	7.27756e-05	NA	NA	NA	NA	NA	NA	NA	NA	NA	NA	NA	NA	NA	NA	NA	NA	NA	NA	NA	NA	NA	3.68561	0.0049724	0.00043997	NA	NA	NA	NA	NA	NA
cg15442728	4.7157	0.00939327	4.4089e-05	NA	NA	NA	NA	NA	NA	NA	NA	NA	NA	NA	NA	NA	NA	NA	NA	NA	NA	NA	NA	NA	NA	NA	NA	NA	NA	NA	NA	NA	NA
cg15446990	NA	NA	NA	NA	NA	NA	NA	NA	NA	NA	NA	NA	NA	NA	NA	NA	NA	NA	NA	NA	NA	NA	NA	NA	3.90145	0.00294632	0.000238093	NA	NA	NA	NA	NA	NA
cg15451729	NA	NA	NA	NA	NA	NA	NA	NA	NA	NA	NA	NA	NA	NA	NA	NA	NA	NA	NA	NA	NA	NA	NA	NA	4.27223	0.032446	8.16141e-05	NA	NA	NA	NA	NA	NA
cg15460348	NA	NA	NA	NA	NA	NA	NA	NA	NA	NA	NA	NA	NA	NA	NA	NA	NA	NA	NA	NA	NA	NA	NA	NA	3.94895	0.0367034	0.000207795	NA	NA	NA	NA	NA	NA
cg15463530	NA	NA	NA	NA	NA	NA	NA	NA	NA	NA	NA	NA	NA	NA	NA	NA	NA	NA	NA	NA	NA	NA	NA	NA	7.5121	0.0329935	4.82952e-09	NA	NA	NA	NA	NA	NA
cg15466952	-4.29991	0.0363593	0.000144931	NA	NA	NA	NA	NA	NA	NA	NA	NA	NA	NA	NA	NA	NA	NA	NA	NA	NA	NA	NA	NA	NA	NA	NA	NA	NA	NA	NA	NA	NA
cg15471812	NA	NA	NA	NA	NA	NA	NA	NA	NA	NA	NA	NA	NA	NA	NA	NA	NA	NA	NA	NA	NA	NA	NA	NA	3.94111	0.0188392	0.000212521	NA	NA	NA	NA	NA	NA
cg15487867	NA	NA	NA	NA	NA	NA	NA	NA	NA	NA	NA	NA	NA	NA	NA	NA	NA	NA	NA	NA	NA	NA	NA	NA	5.14243	0.0139627	6.25351e-06	NA	NA	NA	NA	NA	NA
cg15498409	NA	NA	NA	NA	NA	NA	NA	NA	NA	NA	NA	NA	NA	NA	NA	NA	NA	NA	NA	NA	NA	NA	NA	NA	4.48064	0.0415903	4.43852e-05	NA	NA	NA	NA	NA	NA
cg15501281	NA	NA	NA	NA	NA	NA	NA	NA	NA	-3.98009	0.0261461	2.38634e-06	NA	NA	NA	NA	NA	NA	NA	NA	NA	NA	NA	NA	NA	NA	NA	NA	NA	NA	NA	NA	NA
cg15539944	4.75873	0.00729011	3.89355e-05	NA	NA	NA	NA	NA	NA	NA	NA	NA	NA	NA	NA	NA	NA	NA	NA	NA	NA	NA	NA	NA	NA	NA	NA	NA	NA	NA	NA	NA	NA
cg15545035	4.06212	0.022265	0.000283165	NA	NA	NA	NA	NA	NA	NA	NA	NA	NA	NA	NA	NA	NA	NA	NA	NA	NA	NA	NA	NA	NA	NA	NA	NA	NA	NA	NA	NA	NA
cg15575982	4.08611	0.040747	0.000264772	NA	NA	NA	NA	NA	NA	NA	NA	NA	NA	NA	NA	NA	NA	NA	NA	NA	NA	NA	NA	NA	NA	NA	NA	NA	NA	NA	NA	NA	NA
cg15576900	NA	NA	NA	NA	NA	NA	NA	NA	NA	NA	NA	NA	NA	NA	NA	NA	NA	NA	NA	NA	NA	NA	NA	NA	4.30876	0.0322997	7.33755e-05	NA	NA	NA	NA	NA	NA
cg15582126	4.30918	0.0336751	0.000141171	NA	NA	NA	NA	NA	NA	NA	NA	NA	NA	NA	NA	NA	NA	NA	NA	NA	NA	NA	NA	NA	NA	NA	NA	NA	NA	NA	NA	NA	NA
cg15603424	NA	NA	NA	NA	NA	NA	NA	NA	NA	NA	NA	NA	NA	NA	NA	NA	NA	NA	NA	NA	NA	NA	NA	NA	3.7657	0.00153825	0.000350636	NA	NA	NA	NA	NA	NA
cg15604507	4.50684	0.0382973	8.03751e-05	NA	NA	NA	NA	NA	NA	NA	NA	NA	NA	NA	NA	NA	NA	NA	NA	NA	NA	NA	NA	NA	NA	NA	NA	NA	NA	NA	NA	NA	NA
cg15618108	5.37119	0.0236935	6.51422e-06	NA	NA	NA	NA	NA	NA	NA	NA	NA	NA	NA	NA	NA	NA	NA	NA	NA	NA	NA	NA	NA	4.91454	0.0444786	1.23263e-05	NA	NA	NA	NA	NA	NA
cg15622619	NA	NA	NA	NA	NA	NA	NA	NA	NA	NA	NA	NA	NA	NA	NA	NA	NA	NA	NA	NA	NA	NA	NA	NA	NA	NA	NA	5.65337	0.0437376	3.08974e-05	NA	NA	NA
cg15695852	NA	NA	NA	NA	NA	NA	NA	NA	NA	NA	NA	NA	NA	NA	NA	NA	NA	NA	NA	NA	NA	NA	NA	NA	3.99526	0.0416138	0.000181915	NA	NA	NA	NA	NA	NA
cg15697440	NA	NA	NA	NA	NA	NA	-5.22008	0.038532	1.53981e-05	NA	NA	NA	NA	NA	NA	NA	NA	NA	NA	NA	NA	NA	NA	NA	NA	NA	NA	NA	NA	NA	NA	NA	NA
cg15698795	NA	NA	NA	NA	NA	NA	NA	NA	NA	NA	NA	NA	NA	NA	NA	NA	NA	NA	NA	NA	NA	NA	NA	NA	4.14403	0.0489289	0.000118417	NA	NA	NA	NA	NA	NA
cg15728146	4.14608	0.0296552	0.00022376	NA	NA	NA	NA	NA	NA	NA	NA	NA	NA	NA	NA	NA	NA	NA	NA	NA	NA	NA	NA	NA	NA	NA	NA	NA	NA	NA	NA	NA	NA
cg15766408	4.21909	0.0456719	0.000182161	NA	NA	NA	NA	NA	NA	NA	NA	NA	NA	NA	NA	NA	NA	NA	NA	NA	NA	NA	NA	NA	4.4203	0.0470132	5.29705e-05	NA	NA	NA	NA	NA	NA
cg15774391	NA	NA	NA	NA	NA	NA	NA	NA	NA	NA	NA	NA	NA	NA	NA	NA	NA	NA	NA	NA	NA	NA	NA	NA	3.69175	0.0458501	0.00043239	NA	NA	NA	NA	NA	NA
cg15777964	NA	NA	NA	NA	NA	NA	NA	NA	NA	NA	NA	NA	NA	NA	NA	NA	NA	NA	NA	NA	NA	NA	NA	NA	4.6209	0.0228485	2.93868e-05	NA	NA	NA	NA	NA	NA
cg15790037	NA	NA	NA	NA	NA	NA	NA	NA	NA	NA	NA	NA	NA	NA	NA	NA	NA	NA	NA	NA	NA	NA	NA	NA	3.62335	0.0186534	0.000524456	NA	NA	NA	NA	NA	NA
cg15806313	NA	NA	NA	NA	NA	NA	NA	NA	NA	NA	NA	NA	NA	NA	NA	NA	NA	NA	NA	NA	NA	NA	NA	NA	NA	NA	NA	5.86037	0.0213005	1.91171e-05	NA	NA	NA
cg15830431	NA	NA	NA	NA	NA	NA	NA	NA	NA	NA	NA	NA	NA	NA	NA	NA	NA	NA	NA	NA	NA	NA	NA	NA	5.55034	0.0162201	1.84251e-06	NA	NA	NA	NA	NA	NA
cg15831296	NA	NA	NA	NA	NA	NA	NA	NA	NA	NA	NA	NA	NA	NA	NA	NA	NA	NA	NA	NA	NA	NA	NA	NA	NA	NA	NA	5.88446	0.00221355	1.80771e-05	NA	NA	NA
cg15833843	4.19687	0.018808	0.000193945	NA	NA	NA	NA	NA	NA	NA	NA	NA	NA	NA	NA	NA	NA	NA	NA	NA	NA	NA	NA	NA	4.05345	0.0115757	0.000153848	NA	NA	NA	NA	NA	NA
cg15835232	NA	NA	NA	NA	NA	NA	NA	NA	NA	NA	NA	NA	NA	NA	NA	NA	NA	NA	NA	NA	NA	NA	NA	NA	3.59217	0.0298368	0.000572524	NA	NA	NA	NA	NA	NA
cg15885016	NA	NA	NA	NA	NA	NA	NA	NA	NA	NA	NA	NA	NA	NA	NA	NA	NA	NA	NA	NA	NA	NA	NA	NA	4.67845	0.0221825	2.47991e-05	NA	NA	NA	NA	NA	NA
cg15907699	NA	NA	NA	NA	NA	NA	NA	NA	NA	NA	NA	NA	NA	NA	NA	NA	NA	NA	NA	NA	NA	NA	NA	NA	4.04036	0.00275405	0.000159766	NA	NA	NA	NA	NA	NA
cg15910502	NA	NA	NA	NA	NA	NA	NA	NA	NA	NA	NA	NA	NA	NA	NA	NA	NA	NA	NA	NA	NA	NA	NA	NA	3.96555	0.0052779	0.000198129	NA	NA	NA	NA	NA	NA
cg15932961	NA	NA	NA	NA	NA	NA	NA	NA	NA	NA	NA	NA	NA	NA	NA	NA	NA	NA	NA	NA	NA	NA	NA	NA	3.65304	0.0103116	0.000482348	NA	NA	NA	NA	NA	NA
cg15951557	5.41296	0.0157269	5.76054e-06	NA	NA	NA	NA	NA	NA	NA	NA	NA	NA	NA	NA	NA	NA	NA	NA	NA	NA	NA	NA	NA	5.38951	0.0101064	2.98601e-06	NA	NA	NA	NA	NA	NA
cg15991072	NA	NA	NA	NA	NA	NA	NA	NA	NA	NA	NA	NA	NA	NA	NA	NA	NA	NA	NA	NA	NA	NA	NA	NA	3.99942	0.0260143	0.000179753	NA	NA	NA	NA	NA	NA
cg15994026	NA	NA	NA	NA	NA	NA	NA	NA	NA	NA	NA	NA	NA	NA	NA	NA	NA	NA	NA	NA	NA	NA	NA	NA	3.84825	0.0287567	0.000277191	NA	NA	NA	NA	NA	NA
cg16002355	4.66124	0.0408733	5.15869e-05	NA	NA	NA	NA	NA	NA	NA	NA	NA	NA	NA	NA	NA	NA	NA	NA	NA	NA	NA	NA	NA	NA	NA	NA	NA	NA	NA	NA	NA	NA
cg16078649	NA	NA	NA	NA	NA	NA	NA	NA	NA	NA	NA	NA	NA	NA	NA	NA	NA	NA	5.66696	0.0110337	4.37991e-06	NA	NA	NA	NA	NA	NA	NA	NA	NA	NA	NA	NA
cg16097357	4.3585	0.0478362	0.000122724	NA	NA	NA	NA	NA	NA	NA	NA	NA	NA	NA	NA	NA	NA	NA	NA	NA	NA	NA	NA	NA	NA	NA	NA	NA	NA	NA	NA	NA	NA
cg16098608	NA	NA	NA	NA	NA	NA	NA	NA	NA	NA	NA	NA	NA	NA	NA	NA	NA	NA	NA	NA	NA	NA	NA	NA	3.81891	0.0117294	0.000301376	NA	NA	NA	NA	NA	NA
cg16101148	NA	NA	NA	NA	NA	NA	NA	NA	NA	NA	NA	NA	NA	NA	NA	NA	NA	NA	NA	NA	NA	NA	NA	NA	4.84423	0.0148761	1.5186e-05	NA	NA	NA	NA	NA	NA
cg16150677	4.22675	0.0372125	0.000178266	NA	NA	NA	NA	NA	NA	NA	NA	NA	NA	NA	NA	NA	NA	NA	NA	NA	NA	NA	NA	NA	3.64656	0.033545	0.000491248	NA	NA	NA	NA	NA	NA
cg16190211	NA	NA	NA	NA	NA	NA	NA	NA	NA	NA	NA	NA	NA	NA	NA	NA	NA	NA	NA	NA	NA	NA	NA	NA	3.76327	0.00983517	0.000353064	NA	NA	NA	NA	NA	NA
cg16201883	NA	NA	NA	NA	NA	NA	NA	NA	NA	NA	NA	NA	NA	NA	NA	NA	NA	NA	NA	NA	NA	NA	NA	NA	3.85187	0.0490087	0.000274343	NA	NA	NA	NA	NA	NA
cg16226627	NA	NA	NA	NA	NA	NA	6.17187	0.0268328	9.26463e-06	NA	NA	NA	NA	NA	NA	NA	NA	NA	NA	NA	NA	NA	NA	NA	NA	NA	NA	6.74618	0.0252543	2.42629e-06	NA	NA	NA
cg16238815	NA	NA	NA	NA	NA	NA	NA	NA	NA	NA	NA	NA	NA	NA	NA	NA	NA	NA	NA	NA	NA	NA	NA	NA	4.0632	0.0263593	0.000149584	NA	NA	NA	NA	NA	NA
cg16275903	4.22757	0.0125604	0.000177849	NA	NA	NA	NA	NA	NA	NA	NA	NA	NA	NA	NA	NA	NA	NA	NA	NA	NA	NA	NA	NA	3.84614	0.00228487	0.000278865	5.69936	0.0255816	2.77745e-05	NA	NA	NA
cg16306115	NA	NA	NA	NA	NA	NA	NA	NA	NA	NA	NA	NA	NA	NA	NA	NA	NA	NA	NA	NA	NA	NA	NA	NA	3.62362	0.0260627	0.000524058	NA	NA	NA	NA	NA	NA
cg16308148	NA	NA	NA	NA	NA	NA	NA	NA	NA	NA	NA	NA	NA	NA	NA	NA	NA	NA	NA	NA	NA	NA	NA	NA	3.706	0.0266457	0.000415305	NA	NA	NA	NA	NA	NA
cg16340030	4.25559	0.0112456	0.00016431	NA	NA	NA	NA	NA	NA	NA	NA	NA	NA	NA	NA	NA	NA	NA	NA	NA	NA	NA	NA	NA	4.02702	0.0155756	0.000166026	NA	NA	NA	NA	NA	NA
cg16353006	4.08682	0.030703	0.000264245	NA	NA	NA	NA	NA	NA	NA	NA	NA	NA	NA	NA	NA	NA	NA	NA	NA	NA	NA	NA	NA	3.60663	0.0051995	0.000549725	NA	NA	NA	NA	NA	NA
cg16354201	NA	NA	NA	NA	NA	NA	NA	NA	NA	NA	NA	NA	NA	NA	NA	NA	NA	NA	NA	NA	NA	NA	NA	NA	4.51122	0.0121837	4.05754e-05	NA	NA	NA	NA	NA	NA
cg16398329	NA	NA	NA	NA	NA	NA	NA	NA	NA	NA	NA	NA	NA	NA	NA	NA	NA	NA	NA	NA	NA	NA	NA	NA	4.69012	0.0142485	2.39594e-05	5.66445	0.0362854	3.01147e-05	NA	NA	NA
cg16429070	4.13083	0.0286782	0.000233558	NA	NA	NA	NA	NA	NA	NA	NA	NA	NA	NA	NA	NA	NA	NA	NA	NA	NA	NA	NA	NA	4.25745	0.0276855	8.52026e-05	NA	NA	NA	NA	NA	NA
cg16495265	NA	NA	NA	NA	NA	NA	NA	NA	NA	NA	NA	NA	NA	NA	NA	NA	NA	NA	NA	NA	NA	NA	NA	NA	3.9837	0.000671485	0.000188064	NA	NA	NA	NA	NA	NA
cg16497714	4.05089	0.0113885	0.000292201	NA	NA	NA	NA	NA	NA	NA	NA	NA	NA	NA	NA	NA	NA	NA	NA	NA	NA	NA	NA	NA	NA	NA	NA	NA	NA	NA	NA	NA	NA
cg16499607	4.91638	0.0454834	2.46508e-05	NA	NA	NA	NA	NA	NA	NA	NA	NA	NA	NA	NA	NA	NA	NA	NA	NA	NA	NA	NA	NA	NA	NA	NA	NA	NA	NA	NA	NA	NA
cg16562275	NA	NA	NA	NA	NA	NA	NA	NA	NA	NA	NA	NA	NA	NA	NA	NA	NA	NA	NA	NA	NA	NA	NA	NA	3.69355	0.0365774	0.000430203	NA	NA	NA	NA	NA	NA
cg16594139	4.58563	0.00801058	6.41222e-05	NA	NA	NA	NA	NA	NA	NA	NA	NA	NA	NA	NA	NA	NA	NA	NA	NA	NA	NA	NA	NA	4.40652	0.00831824	5.51502e-05	NA	NA	NA	NA	NA	NA
cg16600991	4.24153	0.0471684	0.000170975	NA	NA	NA	NA	NA	NA	NA	NA	NA	NA	NA	NA	NA	NA	NA	NA	NA	NA	NA	NA	NA	4.53311	0.0156034	3.80492e-05	NA	NA	NA	NA	NA	NA
cg16609181	4.78452	0.0442109	3.61363e-05	NA	NA	NA	NA	NA	NA	NA	NA	NA	NA	NA	NA	NA	NA	NA	NA	NA	NA	NA	NA	NA	4.69833	0.0413391	2.33853e-05	NA	NA	NA	NA	NA	NA
cg16652651	4.36342	0.0439086	0.000121017	NA	NA	NA	NA	NA	NA	NA	NA	NA	NA	NA	NA	NA	NA	NA	NA	NA	NA	NA	NA	NA	4.62649	0.025868	2.89066e-05	NA	NA	NA	NA	NA	NA
cg16670155	4.44174	0.0494689	9.68134e-05	NA	NA	NA	NA	NA	NA	NA	NA	NA	NA	NA	NA	NA	NA	NA	NA	NA	NA	NA	NA	NA	NA	NA	NA	NA	NA	NA	NA	NA	NA
cg16726667	4.16099	0.0132671	0.000214572	NA	NA	NA	NA	NA	NA	NA	NA	NA	NA	NA	NA	NA	NA	NA	NA	NA	NA	NA	NA	NA	3.87137	0.0313931	0.000259486	NA	NA	NA	NA	NA	NA
cg16773115	4.76762	0.0208798	3.79465e-05	NA	NA	NA	NA	NA	NA	NA	NA	NA	NA	NA	NA	NA	NA	NA	NA	NA	NA	NA	NA	NA	NA	NA	NA	NA	NA	NA	NA	NA	NA
cg16842053	NA	NA	NA	NA	NA	NA	NA	NA	NA	NA	NA	NA	NA	NA	NA	NA	NA	NA	NA	NA	NA	NA	NA	NA	4.47667	0.0058609	4.49058e-05	NA	NA	NA	NA	NA	NA
cg16857771	4.44003	0.0193825	9.72889e-05	NA	NA	NA	NA	NA	NA	NA	NA	NA	NA	NA	NA	NA	NA	NA	NA	NA	NA	NA	NA	NA	NA	NA	NA	NA	NA	NA	NA	NA	NA
cg16871449	NA	NA	NA	NA	NA	NA	NA	NA	NA	NA	NA	NA	NA	NA	NA	NA	NA	NA	NA	NA	NA	NA	NA	NA	3.60813	0.0314908	0.000547411	NA	NA	NA	NA	NA	NA
cg16927253	NA	NA	NA	NA	NA	NA	NA	NA	NA	NA	NA	NA	NA	NA	NA	NA	NA	NA	NA	NA	NA	NA	NA	NA	4.60144	0.0123473	3.11199e-05	NA	NA	NA	NA	NA	NA
cg16953283	NA	NA	NA	NA	NA	NA	NA	NA	NA	NA	NA	NA	NA	NA	NA	NA	NA	NA	NA	NA	NA	NA	NA	NA	-3.37866	0.0214694	9.68468e-05	NA	NA	NA	NA	NA	NA
cg16956501	NA	NA	NA	NA	NA	NA	NA	NA	NA	NA	NA	NA	NA	NA	NA	NA	NA	NA	NA	NA	NA	NA	NA	NA	3.75623	0.0300152	0.000360191	NA	NA	NA	NA	NA	NA
cg16970232	4.81003	0.0249233	3.35631e-05	NA	NA	NA	NA	NA	NA	NA	NA	NA	NA	NA	NA	NA	NA	NA	NA	NA	NA	NA	NA	NA	4.26659	0.023901	8.29644e-05	NA	NA	NA	NA	NA	NA
cg16991515	4.66919	0.0121286	5.04198e-05	NA	NA	NA	NA	NA	NA	NA	NA	NA	NA	NA	NA	NA	NA	NA	NA	NA	NA	NA	NA	NA	NA	NA	NA	NA	NA	NA	NA	NA	NA
cg17021218	4.28891	0.0413433	0.000149522	NA	NA	NA	NA	NA	NA	NA	NA	NA	NA	NA	NA	NA	NA	NA	NA	NA	NA	NA	NA	NA	4.42294	0.0238647	5.2563e-05	NA	NA	NA	NA	NA	NA
cg17023776	NA	NA	NA	NA	NA	NA	NA	NA	NA	NA	NA	NA	NA	NA	NA	NA	NA	NA	NA	NA	NA	NA	NA	NA	3.75174	0.0195629	0.000364812	NA	NA	NA	NA	NA	NA
cg17026879	NA	NA	NA	NA	NA	NA	NA	NA	NA	NA	NA	NA	NA	NA	NA	NA	NA	NA	NA	NA	NA	NA	NA	NA	3.87846	0.0360594	0.000254276	NA	NA	NA	NA	NA	NA
cg17035040	NA	NA	NA	NA	NA	NA	NA	NA	NA	NA	NA	NA	NA	NA	NA	NA	NA	NA	NA	NA	NA	NA	NA	NA	4.18035	0.0408152	0.000106588	NA	NA	NA	NA	NA	NA
cg17042098	NA	NA	NA	NA	NA	NA	NA	NA	NA	NA	NA	NA	NA	NA	NA	NA	NA	NA	NA	NA	NA	NA	NA	NA	4.01589	0.0256927	0.000171432	NA	NA	NA	NA	NA	NA
cg17054969	NA	NA	NA	NA	NA	NA	NA	NA	NA	NA	NA	NA	NA	NA	NA	NA	NA	NA	NA	NA	NA	NA	NA	NA	5.20405	0.00334427	5.2022e-06	NA	NA	NA	NA	NA	NA
cg17177816	4.88723	0.0180056	2.68294e-05	NA	NA	NA	NA	NA	NA	NA	NA	NA	NA	NA	NA	NA	NA	NA	NA	NA	NA	NA	NA	NA	NA	NA	NA	NA	NA	NA	NA	NA	NA
cg17185705	NA	NA	NA	NA	NA	NA	NA	NA	NA	NA	NA	NA	NA	NA	NA	NA	NA	NA	NA	NA	NA	NA	NA	NA	4.2883	0.0239515	7.78842e-05	NA	NA	NA	NA	NA	NA
cg17198308	4.14033	0.0106316	0.000227405	NA	NA	NA	NA	NA	NA	NA	NA	NA	NA	NA	NA	NA	NA	NA	NA	NA	NA	NA	NA	NA	NA	NA	NA	NA	NA	NA	NA	NA	NA
cg17265419	NA	NA	NA	NA	NA	NA	NA	NA	NA	NA	NA	NA	NA	NA	NA	NA	NA	NA	NA	NA	NA	NA	NA	NA	4.8013	0.0257148	1.72458e-05	NA	NA	NA	NA	NA	NA
cg17271428	4.56388	0.0262228	6.82525e-05	NA	NA	NA	NA	NA	NA	NA	NA	NA	NA	NA	NA	NA	NA	NA	NA	NA	NA	NA	NA	NA	3.97366	0.0189246	0.000193569	NA	NA	NA	NA	NA	NA
cg17292100	NA	NA	NA	NA	NA	NA	NA	NA	NA	NA	NA	NA	NA	NA	NA	NA	NA	NA	NA	NA	NA	NA	NA	NA	4.20495	0.0467765	9.92468e-05	NA	NA	NA	NA	NA	NA
cg17329249	NA	NA	NA	NA	NA	NA	NA	NA	NA	NA	NA	NA	NA	NA	NA	NA	NA	NA	NA	NA	NA	NA	NA	NA	3.70866	0.0399894	0.000412192	NA	NA	NA	NA	NA	NA
cg17362861	5.41724	0.0478559	5.68821e-06	NA	NA	NA	NA	NA	NA	NA	NA	NA	NA	NA	NA	NA	NA	NA	NA	NA	NA	NA	NA	NA	5.55885	0.013115	1.79598e-06	NA	NA	NA	NA	NA	NA
cg17382048	-4.06423	0.0358733	0.000281495	NA	NA	NA	NA	NA	NA	NA	NA	NA	NA	NA	NA	NA	NA	NA	NA	NA	NA	NA	NA	NA	NA	NA	NA	NA	NA	NA	NA	NA	NA
cg17423978	NA	NA	NA	NA	NA	NA	NA	NA	NA	NA	NA	NA	NA	NA	NA	NA	NA	NA	NA	NA	NA	NA	NA	NA	4.31536	0.0453143	7.19774e-05	NA	NA	NA	NA	NA	NA
cg17488500	4.05838	0.0189865	0.00028614	NA	NA	NA	NA	NA	NA	NA	NA	NA	NA	NA	NA	NA	NA	NA	NA	NA	NA	NA	NA	NA	NA	NA	NA	NA	NA	NA	NA	NA	NA
cg17490052	NA	NA	NA	NA	NA	NA	NA	NA	NA	NA	NA	NA	NA	NA	NA	NA	NA	NA	NA	NA	NA	NA	NA	NA	NA	NA	NA	5.81807	0.0467697	2.10898e-05	NA	NA	NA
cg17490921	NA	NA	NA	NA	NA	NA	NA	NA	NA	NA	NA	NA	NA	NA	NA	NA	NA	NA	NA	NA	NA	NA	NA	NA	5.17099	0.00391095	5.74239e-06	NA	NA	NA	NA	NA	NA
cg17503456	NA	NA	NA	NA	NA	NA	NA	NA	NA	NA	NA	NA	NA	NA	NA	NA	NA	NA	NA	NA	NA	NA	NA	NA	3.90312	0.00830797	0.000236961	NA	NA	NA	NA	NA	NA
cg17519949	NA	NA	NA	NA	NA	NA	NA	NA	NA	NA	NA	NA	NA	NA	NA	NA	NA	NA	NA	NA	NA	NA	NA	NA	4.05759	0.0176603	0.000152024	NA	NA	NA	NA	NA	NA
cg17527589	NA	NA	NA	NA	NA	NA	NA	NA	NA	NA	NA	NA	NA	NA	NA	NA	NA	NA	NA	NA	NA	5.24183	0.0205112	4.15613e-06	NA	NA	NA	NA	NA	NA	NA	NA	NA
cg17536071	NA	NA	NA	NA	NA	NA	NA	NA	NA	NA	NA	NA	NA	NA	NA	NA	NA	NA	NA	NA	NA	NA	NA	NA	3.71337	0.0435374	0.000406732	NA	NA	NA	NA	NA	NA
cg17545346	4.73129	0.0101183	4.21485e-05	NA	NA	NA	NA	NA	NA	NA	NA	NA	NA	NA	NA	NA	NA	NA	NA	NA	NA	NA	NA	NA	4.26972	0.015622	8.22129e-05	NA	NA	NA	NA	NA	NA
cg17558126	4.57404	0.0401031	6.62905e-05	NA	NA	NA	NA	NA	NA	NA	NA	NA	NA	NA	NA	NA	NA	NA	NA	NA	NA	NA	NA	NA	4.54782	0.0256435	3.64392e-05	NA	NA	NA	NA	NA	NA
cg17573720	4.67477	0.0336106	4.9615e-05	NA	NA	NA	NA	NA	NA	NA	NA	NA	NA	NA	NA	NA	NA	NA	NA	NA	NA	NA	NA	NA	4.38315	0.0353537	5.9052e-05	NA	NA	NA	NA	NA	NA
cg17583077	NA	NA	NA	NA	NA	NA	NA	NA	NA	NA	NA	NA	NA	NA	NA	NA	NA	NA	NA	NA	NA	NA	NA	NA	4.12176	0.0261652	0.000126304	NA	NA	NA	NA	NA	NA
cg17633020	NA	NA	NA	NA	NA	NA	NA	NA	NA	NA	NA	NA	NA	NA	NA	NA	NA	NA	NA	NA	NA	NA	NA	NA	3.63503	0.0179566	0.000507478	NA	NA	NA	NA	NA	NA
cg17646820	NA	NA	NA	NA	NA	NA	NA	NA	NA	NA	NA	NA	NA	NA	NA	NA	NA	NA	NA	NA	NA	NA	NA	NA	3.95639	0.0180054	0.00020341	NA	NA	NA	NA	NA	NA
cg17662034	NA	NA	NA	NA	NA	NA	NA	NA	NA	NA	NA	NA	NA	NA	NA	NA	NA	NA	NA	NA	NA	NA	NA	NA	3.66073	0.00839354	0.000471993	NA	NA	NA	NA	NA	NA
cg17666539	4.28554	0.0112639	0.000150954	NA	NA	NA	NA	NA	NA	NA	NA	NA	NA	NA	NA	NA	NA	NA	NA	NA	NA	NA	NA	NA	NA	NA	NA	NA	NA	NA	NA	NA	NA
cg17679104	NA	NA	NA	NA	NA	NA	NA	NA	NA	NA	NA	NA	NA	NA	NA	NA	NA	NA	NA	NA	NA	NA	NA	NA	3.7556	0.0173025	0.000360839	NA	NA	NA	NA	NA	NA
cg17698295	4.79934	0.0462639	3.46181e-05	NA	NA	NA	NA	NA	NA	NA	NA	NA	NA	NA	NA	NA	NA	NA	NA	NA	NA	NA	NA	NA	NA	NA	NA	NA	NA	NA	NA	NA	NA
cg17707057	NA	NA	NA	NA	NA	NA	NA	NA	NA	NA	NA	NA	NA	NA	NA	NA	NA	NA	NA	NA	NA	NA	NA	NA	3.78252	0.0300764	0.000334269	NA	NA	NA	NA	NA	NA
cg17725100	NA	NA	NA	NA	NA	NA	NA	NA	NA	NA	NA	NA	NA	NA	NA	NA	NA	NA	NA	NA	NA	NA	NA	NA	3.84797	0.0234545	0.000277415	NA	NA	NA	NA	NA	NA
cg17727989	5.56396	0.0377869	3.68966e-06	NA	NA	NA	NA	NA	NA	NA	NA	NA	NA	NA	NA	NA	NA	NA	NA	NA	NA	NA	NA	NA	NA	NA	NA	NA	NA	NA	NA	NA	NA
cg17738010	NA	NA	NA	NA	NA	NA	NA	NA	NA	NA	NA	NA	NA	NA	NA	NA	NA	NA	NA	NA	NA	NA	NA	NA	3.60118	0.0260116	0.000558204	NA	NA	NA	NA	NA	NA
cg17739038	NA	NA	NA	NA	NA	NA	NA	NA	NA	NA	NA	NA	NA	NA	NA	NA	NA	NA	NA	NA	NA	NA	NA	NA	4.00739	0.0227838	0.000175676	NA	NA	NA	NA	NA	NA
cg17802942	NA	NA	NA	NA	NA	NA	NA	NA	NA	NA	NA	NA	NA	NA	NA	NA	NA	NA	NA	NA	NA	NA	NA	NA	4.2875	0.0162144	7.80654e-05	NA	NA	NA	NA	NA	NA
cg17820365	NA	NA	NA	NA	NA	NA	NA	NA	NA	NA	NA	NA	NA	NA	NA	NA	NA	NA	NA	NA	NA	NA	NA	NA	3.69523	0.0287679	0.000428156	NA	NA	NA	NA	NA	NA
cg17820591	6.21052	0.0279079	5.40713e-07	NA	NA	NA	NA	NA	NA	NA	NA	NA	NA	NA	NA	NA	NA	NA	NA	NA	NA	NA	NA	NA	5.7798	0.0077579	9.23569e-07	NA	NA	NA	NA	NA	NA
cg17833066	4.41304	0.0206905	0.000105074	NA	NA	NA	NA	NA	NA	NA	NA	NA	NA	NA	NA	NA	NA	NA	NA	NA	NA	NA	NA	NA	NA	NA	NA	NA	NA	NA	NA	NA	NA
cg17848828	NA	NA	NA	NA	NA	NA	NA	NA	NA	NA	NA	NA	NA	NA	NA	NA	NA	NA	NA	NA	NA	NA	NA	NA	3.87679	0.0225465	0.000255497	NA	NA	NA	NA	NA	NA
cg17856830	NA	NA	NA	NA	NA	NA	NA	NA	NA	NA	NA	NA	NA	NA	NA	NA	NA	NA	NA	NA	NA	NA	NA	NA	4.08748	0.0162222	0.000139459	NA	NA	NA	NA	NA	NA
cg17930034	4.35294	0.0185522	0.000124678	NA	NA	NA	NA	NA	NA	NA	NA	NA	NA	NA	NA	NA	NA	NA	NA	NA	NA	NA	NA	NA	3.98788	0.00739533	0.000185817	NA	NA	NA	NA	NA	NA
cg17933722	4.2978	0.0131232	0.000145803	NA	NA	NA	NA	NA	NA	NA	NA	NA	NA	NA	NA	NA	NA	NA	NA	NA	NA	NA	NA	NA	4.19434	0.0252751	0.000102349	NA	NA	NA	NA	NA	NA
cg17935217	5.26853	0.0213683	8.80888e-06	NA	NA	NA	NA	NA	NA	NA	NA	NA	NA	NA	NA	NA	NA	NA	NA	NA	NA	NA	NA	NA	4.51514	0.00577459	4.01113e-05	NA	NA	NA	NA	NA	NA
cg17965019	4.0789	0.027447	0.000270177	NA	NA	NA	NA	NA	NA	NA	NA	NA	NA	NA	NA	NA	NA	NA	NA	NA	NA	NA	NA	NA	NA	NA	NA	NA	NA	NA	NA	NA	NA
cg17980625	NA	NA	NA	NA	NA	NA	NA	NA	NA	NA	NA	NA	NA	NA	NA	NA	NA	NA	NA	NA	NA	NA	NA	NA	5.11298	0.0312131	6.82779e-06	NA	NA	NA	NA	NA	NA
cg17984537	NA	NA	NA	NA	NA	NA	NA	NA	NA	NA	NA	NA	NA	NA	NA	NA	NA	NA	NA	NA	NA	NA	NA	NA	3.58942	0.00360816	0.000576961	NA	NA	NA	NA	NA	NA
cg18001180	NA	NA	NA	NA	NA	NA	NA	NA	NA	NA	NA	NA	NA	NA	NA	NA	NA	NA	NA	NA	NA	NA	NA	NA	3.86689	0.0193911	0.000262826	NA	NA	NA	NA	NA	NA
cg18016254	5.84372	0.0121104	1.611e-06	NA	NA	NA	NA	NA	NA	NA	NA	NA	NA	NA	NA	NA	NA	NA	NA	NA	NA	NA	NA	NA	5.68243	0.0156128	1.23837e-06	NA	NA	NA	NA	NA	NA
cg18023251	4.35239	0.0264591	0.000124874	NA	NA	NA	NA	NA	NA	NA	NA	NA	NA	NA	NA	NA	NA	NA	NA	NA	NA	NA	NA	NA	4.25886	0.0385347	8.48525e-05	NA	NA	NA	NA	NA	NA
cg18026955	4.32377	0.0286373	0.000135447	NA	NA	NA	NA	NA	NA	NA	NA	NA	NA	NA	NA	NA	NA	NA	NA	NA	NA	NA	NA	NA	4.24111	0.00516248	8.93477e-05	NA	NA	NA	NA	NA	NA
cg18027903	4.25023	0.038229	0.000166818	NA	NA	NA	NA	NA	NA	NA	NA	NA	NA	NA	NA	NA	NA	NA	NA	NA	NA	NA	NA	NA	3.91183	0.0045841	0.000231122	NA	NA	NA	NA	NA	NA
cg18070562	NA	NA	NA	NA	NA	NA	NA	NA	NA	NA	NA	NA	NA	NA	NA	NA	NA	NA	NA	NA	NA	NA	NA	NA	4.12801	0.041919	0.000124041	NA	NA	NA	NA	NA	NA
cg18096939	NA	NA	NA	NA	NA	NA	NA	NA	NA	NA	NA	NA	NA	NA	NA	NA	NA	NA	NA	NA	NA	NA	NA	NA	3.61777	0.0451363	0.000532755	NA	NA	NA	NA	NA	NA
cg18103859	4.34027	0.0157572	0.000129249	NA	NA	NA	NA	NA	NA	NA	NA	NA	NA	NA	NA	NA	NA	NA	NA	NA	NA	NA	NA	NA	3.9202	0.0463144	0.00022565	NA	NA	NA	NA	NA	NA
cg18107094	NA	NA	NA	NA	NA	NA	NA	NA	NA	NA	NA	NA	NA	NA	NA	NA	NA	NA	NA	NA	NA	NA	NA	NA	4.34988	0.0271531	6.50803e-05	NA	NA	NA	NA	NA	NA
cg18116154	NA	NA	NA	NA	NA	NA	NA	NA	NA	NA	NA	NA	NA	NA	NA	NA	NA	NA	NA	NA	NA	NA	NA	NA	4.21622	0.0175839	9.60501e-05	NA	NA	NA	NA	NA	NA
cg18139020	4.31708	0.00746061	0.000138042	NA	NA	NA	NA	NA	NA	NA	NA	NA	NA	NA	NA	NA	NA	NA	NA	NA	NA	NA	NA	NA	4.37262	0.0163887	6.08976e-05	NA	NA	NA	NA	NA	NA
cg18155840	4.36735	0.0232822	0.000119674	NA	NA	NA	NA	NA	NA	NA	NA	NA	NA	NA	NA	NA	NA	NA	NA	NA	NA	NA	NA	NA	4.61622	0.0163257	2.97945e-05	NA	NA	NA	NA	NA	NA
cg18196709	NA	NA	NA	NA	NA	NA	NA	NA	NA	NA	NA	NA	NA	NA	NA	NA	NA	NA	NA	NA	NA	NA	NA	NA	3.92723	0.00350252	0.000221149	5.75075	0.0261451	2.46551e-05	NA	NA	NA
cg18196829	4.16628	0.0144845	0.000211397	NA	NA	NA	NA	NA	NA	NA	NA	NA	NA	NA	NA	NA	NA	NA	NA	NA	NA	NA	NA	NA	4.41184	0.0424589	5.42985e-05	NA	NA	NA	NA	NA	NA
cg18219713	NA	NA	NA	NA	NA	NA	NA	NA	NA	NA	NA	NA	NA	NA	NA	NA	NA	NA	NA	NA	NA	NA	NA	NA	3.96244	0.0409365	0.000199907	NA	NA	NA	NA	NA	NA
cg18220380	NA	NA	NA	NA	NA	NA	NA	NA	NA	NA	NA	NA	NA	NA	NA	NA	NA	NA	NA	NA	NA	NA	NA	NA	3.67544	0.00624147	0.000452799	NA	NA	NA	NA	NA	NA
cg18220920	NA	NA	NA	NA	NA	NA	NA	NA	NA	NA	NA	NA	NA	NA	NA	NA	NA	NA	5.63383	0.0388002	4.78738e-06	NA	NA	NA	NA	NA	NA	NA	NA	NA	NA	NA	NA
cg18224445	NA	NA	NA	NA	NA	NA	NA	NA	NA	NA	NA	NA	NA	NA	NA	NA	NA	NA	NA	NA	NA	NA	NA	NA	5.81069	0.0233642	8.41441e-07	NA	NA	NA	NA	NA	NA
cg18375441	4.22885	0.0141092	0.000177209	NA	NA	NA	NA	NA	NA	NA	NA	NA	NA	NA	NA	NA	NA	NA	NA	NA	NA	NA	NA	NA	NA	NA	NA	NA	NA	NA	NA	NA	NA
cg18377512	NA	NA	NA	NA	NA	NA	6.05589	0.0477059	1.21356e-05	NA	NA	NA	NA	NA	NA	NA	NA	NA	NA	NA	NA	NA	NA	NA	NA	NA	NA	NA	NA	NA	NA	NA	NA
cg18396041	NA	NA	NA	NA	NA	NA	NA	NA	NA	NA	NA	NA	NA	NA	NA	NA	NA	NA	NA	NA	NA	NA	NA	NA	4.04631	0.0260562	0.000157049	NA	NA	NA	NA	NA	NA
cg18411108	NA	NA	NA	NA	NA	NA	NA	NA	NA	NA	NA	NA	NA	NA	NA	NA	NA	NA	NA	NA	NA	NA	NA	NA	3.81104	0.00997332	0.000308215	NA	NA	NA	NA	NA	NA
cg18416881	4.16056	0.0170171	0.000214829	NA	NA	NA	NA	NA	NA	NA	NA	NA	NA	NA	NA	NA	NA	NA	NA	NA	NA	NA	NA	NA	4.05815	0.0445737	0.000151777	NA	NA	NA	NA	NA	NA
cg18497508	4.74506	0.0388768	4.0504e-05	NA	NA	NA	NA	NA	NA	NA	NA	NA	NA	NA	NA	NA	NA	NA	NA	NA	NA	NA	NA	NA	3.98996	0.00899088	0.000184708	NA	NA	NA	NA	NA	NA
cg18514065	NA	NA	NA	NA	NA	NA	NA	NA	NA	NA	NA	NA	NA	NA	NA	NA	NA	NA	NA	NA	NA	NA	NA	NA	NA	NA	NA	5.92791	0.0463579	1.63413e-05	NA	NA	NA
cg18514922	4.15994	0.0455464	0.000215203	NA	NA	NA	NA	NA	NA	NA	NA	NA	NA	NA	NA	NA	NA	NA	NA	NA	NA	NA	NA	NA	NA	NA	NA	NA	NA	NA	NA	NA	NA
cg18538501	NA	NA	NA	NA	NA	NA	NA	NA	NA	NA	NA	NA	NA	NA	NA	NA	NA	NA	NA	NA	NA	NA	NA	NA	3.99152	0.0484113	0.000183883	NA	NA	NA	NA	NA	NA
cg18565132	NA	NA	NA	NA	NA	NA	NA	NA	NA	NA	NA	NA	NA	NA	NA	NA	NA	NA	NA	NA	NA	NA	NA	NA	4.62925	0.0171337	2.86726e-05	NA	NA	NA	NA	NA	NA
cg18601714	4.50596	0.0358252	8.05778e-05	NA	NA	NA	NA	NA	NA	NA	NA	NA	NA	NA	NA	NA	NA	NA	NA	NA	NA	NA	NA	NA	NA	NA	NA	NA	NA	NA	NA	NA	NA
cg18609044	4.12378	0.0436093	0.000238229	NA	NA	NA	NA	NA	NA	NA	NA	NA	NA	NA	NA	NA	NA	NA	NA	NA	NA	NA	NA	NA	NA	NA	NA	NA	NA	NA	NA	NA	NA
cg18610889	NA	NA	NA	NA	NA	NA	NA	NA	NA	NA	NA	NA	NA	NA	NA	NA	NA	NA	NA	NA	NA	NA	NA	NA	3.72255	0.0469867	0.000396295	NA	NA	NA	NA	NA	NA
cg18647237	NA	NA	NA	NA	NA	NA	NA	NA	NA	NA	NA	NA	NA	NA	NA	NA	NA	NA	NA	NA	NA	NA	NA	NA	4.47357	0.0489171	4.53156e-05	NA	NA	NA	NA	NA	NA
cg18670236	NA	NA	NA	NA	NA	NA	NA	NA	NA	NA	NA	NA	NA	NA	NA	NA	NA	NA	NA	NA	NA	NA	NA	NA	3.61675	0.0496897	0.000534293	NA	NA	NA	NA	NA	NA
cg18676237	4.32669	0.0457302	0.00013433	NA	NA	NA	NA	NA	NA	NA	NA	NA	NA	NA	NA	NA	NA	NA	NA	NA	NA	NA	NA	NA	4.38939	0.0414326	5.7985e-05	NA	NA	NA	NA	NA	NA
cg18702820	4.74609	0.0452503	4.03843e-05	NA	NA	NA	NA	NA	NA	NA	NA	NA	NA	NA	NA	NA	NA	NA	NA	NA	NA	NA	NA	NA	5.46916	0.0104122	2.35132e-06	NA	NA	NA	NA	NA	NA
cg18725573	4.68794	0.00433171	4.77661e-05	NA	NA	NA	NA	NA	NA	NA	NA	NA	NA	NA	NA	NA	NA	NA	NA	NA	NA	NA	NA	NA	4.65544	0.0375977	2.65413e-05	NA	NA	NA	NA	NA	NA
cg18735214	NA	NA	NA	NA	NA	NA	NA	NA	NA	NA	NA	NA	NA	NA	NA	NA	NA	NA	NA	NA	NA	NA	NA	NA	4.0707	0.0448931	0.000146382	NA	NA	NA	NA	NA	NA
cg18750756	NA	NA	NA	NA	NA	NA	NA	NA	NA	NA	NA	NA	NA	NA	NA	NA	NA	NA	NA	NA	NA	NA	NA	NA	4.16702	0.0277345	0.00011079	NA	NA	NA	NA	NA	NA
cg18866586	NA	NA	NA	NA	NA	NA	NA	NA	NA	NA	NA	NA	NA	NA	NA	NA	NA	NA	NA	NA	NA	NA	NA	NA	3.69841	0.0131201	0.000424328	NA	NA	NA	NA	NA	NA
cg18891712	4.58376	0.0412665	6.44665e-05	NA	NA	NA	NA	NA	NA	NA	NA	NA	NA	NA	NA	NA	NA	NA	NA	NA	NA	NA	NA	NA	5.05205	0.0491516	8.18785e-06	NA	NA	NA	NA	NA	NA
cg18905461	4.07052	0.0103538	0.000276591	NA	NA	NA	NA	NA	NA	NA	NA	NA	NA	NA	NA	NA	NA	NA	NA	NA	NA	NA	NA	NA	NA	NA	NA	NA	NA	NA	NA	NA	NA
cg18954719	NA	NA	NA	NA	NA	NA	NA	NA	NA	NA	NA	NA	NA	NA	NA	NA	NA	NA	NA	NA	NA	NA	NA	NA	3.61855	0.011761	0.000531581	NA	NA	NA	NA	NA	NA
cg18959554	NA	NA	NA	NA	NA	NA	NA	NA	NA	NA	NA	NA	NA	NA	NA	NA	NA	NA	NA	NA	NA	NA	NA	NA	3.60194	0.00411334	0.000557012	NA	NA	NA	NA	NA	NA
cg18975130	4.43427	0.0354019	9.89019e-05	NA	NA	NA	NA	NA	NA	NA	NA	NA	NA	NA	NA	NA	NA	NA	NA	NA	NA	NA	NA	NA	NA	NA	NA	NA	NA	NA	NA	NA	NA
cg18996910	NA	NA	NA	NA	NA	NA	NA	NA	NA	NA	NA	NA	NA	NA	NA	NA	NA	NA	NA	NA	NA	NA	NA	NA	3.56909	0.0234036	0.000610863	NA	NA	NA	NA	NA	NA
cg19006003	NA	NA	NA	NA	NA	NA	NA	NA	NA	NA	NA	NA	NA	NA	NA	NA	NA	NA	6.03058	0.0492855	1.64712e-06	NA	NA	NA	NA	NA	NA	NA	NA	NA	NA	NA	NA
cg19035966	5.19488	0.0141722	1.09332e-05	NA	NA	NA	NA	NA	NA	NA	NA	NA	NA	NA	NA	NA	NA	NA	NA	NA	NA	NA	NA	NA	5.25567	0.0117585	4.4582e-06	NA	NA	NA	NA	NA	NA
cg19058495	4.47986	0.040196	8.68257e-05	NA	NA	NA	NA	NA	NA	NA	NA	NA	NA	NA	NA	NA	NA	NA	NA	NA	NA	NA	NA	NA	5.05127	0.0077557	8.20685e-06	NA	NA	NA	NA	NA	NA
cg19111459	4.68576	0.00546442	4.80674e-05	NA	NA	NA	NA	NA	NA	NA	NA	NA	NA	NA	NA	NA	NA	NA	NA	NA	NA	NA	NA	NA	4.85896	0.0185319	1.45366e-05	NA	NA	NA	NA	NA	NA
cg19124509	4.65852	0.0319355	5.19935e-05	NA	NA	NA	NA	NA	NA	NA	NA	NA	NA	NA	NA	NA	NA	NA	NA	NA	NA	NA	NA	NA	4.1959	0.0168279	0.000101887	NA	NA	NA	NA	NA	NA
cg19131731	4.26571	0.0101658	0.000159673	NA	NA	NA	NA	NA	NA	NA	NA	NA	NA	NA	NA	NA	NA	NA	NA	NA	NA	NA	NA	NA	4.74546	0.0459115	2.03447e-05	NA	NA	NA	NA	NA	NA
cg19162075	NA	NA	NA	NA	NA	NA	NA	NA	NA	NA	NA	NA	NA	NA	NA	NA	NA	NA	NA	NA	NA	NA	NA	NA	3.66078	0.0164463	0.000471935	NA	NA	NA	NA	NA	NA
cg19200285	4.15291	0.00698593	0.000219501	NA	NA	NA	NA	NA	NA	NA	NA	NA	NA	NA	NA	NA	NA	NA	NA	NA	NA	NA	NA	NA	5.08689	0.0317383	7.38028e-06	NA	NA	NA	NA	NA	NA
cg19214408	5.10425	0.0416813	1.42546e-05	NA	NA	NA	NA	NA	NA	NA	NA	NA	NA	NA	NA	NA	NA	NA	NA	NA	NA	NA	NA	NA	4.91101	0.0022961	1.2456e-05	NA	NA	NA	NA	NA	NA
cg19235339	NA	NA	NA	NA	NA	NA	NA	NA	NA	NA	NA	NA	NA	NA	NA	NA	NA	NA	NA	NA	NA	NA	NA	NA	5.57786	0.0415371	1.69625e-06	NA	NA	NA	NA	NA	NA
cg19241689	4.66684	0.00440659	5.0761e-05	NA	NA	NA	NA	NA	NA	NA	NA	NA	NA	NA	NA	NA	NA	NA	NA	NA	NA	NA	NA	NA	4.28061	0.0270634	7.9648e-05	NA	NA	NA	NA	NA	NA
cg19267163	-4.06419	0.0455632	0.000281531	NA	NA	NA	NA	NA	NA	NA	NA	NA	NA	NA	NA	NA	NA	NA	NA	NA	NA	NA	NA	NA	NA	NA	NA	NA	NA	NA	NA	NA	NA
cg19270505	4.16712	0.0276514	0.000210896	NA	NA	NA	NA	NA	NA	NA	NA	NA	NA	NA	NA	NA	NA	NA	NA	NA	NA	NA	NA	NA	4.19718	0.0240012	0.000101509	NA	NA	NA	NA	NA	NA
cg19305111	NA	NA	NA	NA	NA	NA	NA	NA	NA	NA	NA	NA	NA	NA	NA	NA	NA	NA	NA	NA	NA	NA	NA	NA	3.6536	0.0401861	0.000481598	NA	NA	NA	NA	NA	NA
cg19306380	NA	NA	NA	NA	NA	NA	NA	NA	NA	NA	NA	NA	NA	NA	NA	NA	NA	NA	NA	NA	NA	NA	NA	NA	4.28742	0.0465684	7.80833e-05	NA	NA	NA	NA	NA	NA
cg19343631	4.3514	0.0249866	0.000125226	NA	NA	NA	NA	NA	NA	NA	NA	NA	NA	NA	NA	NA	NA	NA	NA	NA	NA	NA	NA	NA	NA	NA	NA	NA	NA	NA	NA	NA	NA
cg19349369	4.67486	0.0134419	4.96019e-05	NA	NA	NA	NA	NA	NA	NA	NA	NA	NA	NA	NA	NA	NA	NA	NA	NA	NA	NA	NA	NA	3.93494	0.00620759	0.000216319	NA	NA	NA	NA	NA	NA
cg19425431	NA	NA	NA	NA	NA	NA	NA	NA	NA	NA	NA	NA	NA	NA	NA	NA	NA	NA	NA	NA	NA	NA	NA	NA	4.3111	0.0349018	7.28764e-05	NA	NA	NA	NA	NA	NA
cg19448780	NA	NA	NA	NA	NA	NA	NA	NA	NA	NA	NA	NA	NA	NA	NA	NA	NA	NA	NA	NA	NA	NA	NA	NA	NA	NA	NA	5.57095	0.0237727	3.73931e-05	NA	NA	NA
cg19480724	NA	NA	NA	NA	NA	NA	NA	NA	NA	NA	NA	NA	NA	NA	NA	NA	NA	NA	NA	NA	NA	NA	NA	NA	4.00805	0.0190349	0.000175343	NA	NA	NA	NA	NA	NA
cg19548479	4.78701	0.0243877	3.58764e-05	NA	NA	NA	NA	NA	NA	NA	NA	NA	NA	NA	NA	NA	NA	NA	NA	NA	NA	NA	NA	NA	4.61286	0.0235536	3.00911e-05	NA	NA	NA	NA	NA	NA
cg19554255	NA	NA	NA	NA	NA	NA	NA	NA	NA	NA	NA	NA	NA	NA	NA	NA	NA	NA	NA	NA	NA	NA	NA	NA	4.13497	0.0383868	0.000121565	NA	NA	NA	NA	NA	NA
cg19609334	NA	NA	NA	NA	NA	NA	NA	NA	NA	NA	NA	NA	NA	NA	NA	NA	NA	NA	NA	NA	NA	NA	NA	NA	3.61029	0.0154887	0.000544083	NA	NA	NA	NA	NA	NA
cg19610905	NA	NA	NA	NA	NA	NA	NA	NA	NA	NA	NA	NA	NA	NA	NA	NA	NA	NA	NA	NA	NA	NA	NA	NA	4.43043	0.0200473	5.14224e-05	NA	NA	NA	NA	NA	NA
cg19643390	NA	NA	NA	NA	NA	NA	NA	NA	NA	NA	NA	NA	NA	NA	NA	NA	NA	NA	NA	NA	NA	NA	NA	NA	3.68581	0.0174746	0.000439715	NA	NA	NA	NA	NA	NA
cg19655032	NA	NA	NA	NA	NA	NA	NA	NA	NA	NA	NA	NA	NA	NA	NA	NA	NA	NA	NA	NA	NA	NA	NA	NA	3.59532	0.0269474	0.000567476	NA	NA	NA	NA	NA	NA
cg19675731	NA	NA	NA	NA	NA	NA	NA	NA	NA	NA	NA	NA	NA	NA	NA	NA	NA	NA	NA	NA	NA	NA	NA	NA	4.16839	0.0368007	0.000110351	NA	NA	NA	NA	NA	NA
cg19676835	NA	NA	NA	NA	NA	NA	NA	NA	NA	NA	NA	NA	NA	NA	NA	NA	NA	NA	NA	NA	NA	NA	NA	NA	3.57245	0.020953	0.000605121	NA	NA	NA	NA	NA	NA
cg19695521	NA	NA	NA	NA	NA	NA	NA	NA	NA	NA	NA	NA	NA	NA	NA	NA	NA	NA	NA	NA	NA	NA	NA	NA	4.41682	0.000250243	5.35128e-05	NA	NA	NA	NA	NA	NA
cg19703628	NA	NA	NA	NA	NA	NA	NA	NA	NA	NA	NA	NA	NA	NA	NA	NA	NA	NA	NA	NA	NA	NA	NA	NA	3.68579	0.0316537	0.000439743	NA	NA	NA	NA	NA	NA
cg19706516	NA	NA	NA	NA	NA	NA	NA	NA	NA	NA	NA	NA	NA	NA	NA	NA	NA	NA	NA	NA	NA	NA	NA	NA	4.38849	0.0149518	5.8137e-05	NA	NA	NA	NA	NA	NA
cg19721787	4.47717	0.0192996	8.74952e-05	NA	NA	NA	NA	NA	NA	NA	NA	NA	NA	NA	NA	NA	NA	NA	NA	NA	NA	NA	NA	NA	NA	NA	NA	NA	NA	NA	NA	NA	NA
cg19764345	NA	NA	NA	NA	NA	NA	NA	NA	NA	NA	NA	NA	NA	NA	NA	NA	NA	NA	NA	NA	NA	NA	NA	NA	3.73837	0.0109278	0.000378919	NA	NA	NA	NA	NA	NA
cg19798908	4.59536	0.0367858	6.2354e-05	NA	NA	NA	NA	NA	NA	NA	NA	NA	NA	NA	NA	NA	NA	NA	NA	NA	NA	NA	NA	NA	3.59328	0.000707178	0.000570739	NA	NA	NA	NA	NA	NA
cg19814116	NA	NA	NA	NA	NA	NA	NA	NA	NA	NA	NA	NA	NA	NA	NA	NA	NA	NA	NA	NA	NA	NA	NA	NA	3.75589	0.0499004	0.000360538	NA	NA	NA	NA	NA	NA
cg19851563	NA	NA	NA	NA	NA	NA	NA	NA	NA	NA	NA	NA	NA	NA	NA	NA	NA	NA	NA	NA	NA	NA	NA	NA	4.16616	0.0338342	0.000111065	NA	NA	NA	NA	NA	NA
cg19863210	NA	NA	NA	NA	NA	NA	NA	NA	NA	NA	NA	NA	NA	NA	NA	NA	NA	NA	NA	NA	NA	NA	NA	NA	4.22674	0.037586	9.31594e-05	NA	NA	NA	NA	NA	NA
cg19894975	4.22668	0.0495833	0.000178298	NA	NA	NA	NA	NA	NA	NA	NA	NA	NA	NA	NA	NA	NA	NA	NA	NA	NA	NA	NA	NA	4.09001	0.0481618	0.000138443	NA	NA	NA	NA	NA	NA
cg19907326	NA	NA	NA	NA	NA	NA	NA	NA	NA	NA	NA	NA	NA	NA	NA	NA	NA	NA	NA	NA	NA	NA	NA	NA	4.29762	0.0326576	7.5798e-05	NA	NA	NA	NA	NA	NA
cg19913934	NA	NA	NA	NA	NA	NA	NA	NA	NA	NA	NA	NA	NA	NA	NA	NA	NA	NA	NA	NA	NA	NA	NA	NA	3.81457	0.017194	0.000305126	NA	NA	NA	NA	NA	NA
cg19923650	4.36084	0.0326855	0.000121909	NA	NA	NA	NA	NA	NA	NA	NA	NA	NA	NA	NA	NA	NA	NA	NA	NA	NA	NA	NA	NA	4.94197	0.0156979	1.13616e-05	NA	NA	NA	NA	NA	NA
cg19933664	NA	NA	NA	NA	NA	NA	NA	NA	NA	NA	NA	NA	NA	NA	NA	NA	NA	NA	NA	NA	NA	NA	NA	NA	3.64086	0.0188619	0.000499211	NA	NA	NA	NA	NA	NA
cg19935909	NA	NA	NA	NA	NA	NA	NA	NA	NA	NA	NA	NA	NA	NA	NA	NA	NA	NA	NA	NA	NA	NA	NA	NA	3.93112	0.0449587	0.000218695	NA	NA	NA	NA	NA	NA
cg19936847	NA	NA	NA	NA	NA	NA	NA	NA	NA	NA	NA	NA	NA	NA	NA	NA	NA	NA	NA	NA	NA	NA	NA	NA	4.29791	0.00179768	7.57335e-05	NA	NA	NA	NA	NA	NA
cg19987611	NA	NA	NA	NA	NA	NA	NA	NA	NA	NA	NA	NA	NA	NA	NA	NA	NA	NA	NA	NA	NA	NA	NA	NA	3.75244	0.0203409	0.000364085	NA	NA	NA	NA	NA	NA
cg20000220	NA	NA	NA	NA	NA	NA	NA	NA	NA	NA	NA	NA	NA	NA	NA	NA	NA	NA	NA	NA	NA	NA	NA	NA	4.33227	0.048555	6.85118e-05	NA	NA	NA	NA	NA	NA
cg20038493	NA	NA	NA	NA	NA	NA	NA	NA	NA	NA	NA	NA	NA	NA	NA	NA	NA	NA	NA	NA	NA	NA	NA	NA	3.74914	0.00765766	0.000367516	NA	NA	NA	NA	NA	NA
cg20040488	4.33548	0.00889494	0.000131017	NA	NA	NA	NA	NA	NA	NA	NA	NA	NA	NA	NA	NA	NA	NA	NA	NA	NA	NA	NA	NA	NA	NA	NA	NA	NA	NA	NA	NA	NA
cg20096204	4.94562	0.0154687	2.2641e-05	NA	NA	NA	NA	NA	NA	NA	NA	NA	NA	NA	NA	NA	NA	NA	NA	NA	NA	NA	NA	NA	4.06238	0.0162725	0.000149937	NA	NA	NA	NA	NA	NA
cg20127102	4.24322	0.00700796	0.000170161	NA	NA	NA	NA	NA	NA	NA	NA	NA	NA	NA	NA	NA	NA	NA	NA	NA	NA	NA	NA	NA	4.4178	0.0249258	5.33596e-05	NA	NA	NA	NA	NA	NA
cg20134541	4.55303	0.00974839	7.04103e-05	NA	NA	NA	NA	NA	NA	NA	NA	NA	NA	NA	NA	NA	NA	NA	NA	NA	NA	NA	NA	NA	NA	NA	NA	NA	NA	NA	NA	NA	NA
cg20147595	4.79311	0.0324387	3.52487e-05	NA	NA	NA	NA	NA	NA	NA	NA	NA	NA	NA	NA	NA	NA	NA	NA	NA	NA	NA	NA	NA	4.16315	0.0330334	0.000112039	NA	NA	NA	NA	NA	NA
cg20162652	4.52783	0.0442971	7.56867e-05	NA	NA	NA	NA	NA	NA	NA	NA	NA	NA	NA	NA	NA	NA	NA	NA	NA	NA	NA	NA	NA	4.28832	0.0301342	7.78793e-05	NA	NA	NA	NA	NA	NA
cg20180843	5.48203	0.0365537	4.6993e-06	NA	NA	NA	NA	NA	NA	NA	NA	NA	NA	NA	NA	NA	NA	NA	NA	NA	NA	NA	NA	NA	5.51141	0.0100846	2.07115e-06	NA	NA	NA	NA	NA	NA
cg20189761	NA	NA	NA	NA	NA	NA	NA	NA	NA	NA	NA	NA	NA	NA	NA	NA	NA	NA	NA	NA	NA	NA	NA	NA	3.98487	0.00812947	0.000187432	NA	NA	NA	NA	NA	NA
cg20195812	NA	NA	NA	NA	NA	NA	NA	NA	NA	NA	NA	NA	NA	NA	NA	NA	NA	NA	NA	NA	NA	NA	NA	NA	3.69996	0.0383607	0.000422474	NA	NA	NA	NA	NA	NA
cg20242781	NA	NA	NA	NA	NA	NA	NA	NA	NA	NA	NA	NA	NA	NA	NA	NA	NA	NA	NA	NA	NA	NA	NA	NA	3.69648	0.0235504	0.00042665	NA	NA	NA	NA	NA	NA
cg20250080	4.24503	0.0263747	0.000169289	NA	NA	NA	NA	NA	NA	NA	NA	NA	NA	NA	NA	NA	NA	NA	NA	NA	NA	NA	NA	NA	4.26646	0.0454173	8.29969e-05	NA	NA	NA	NA	NA	NA
cg20255775	NA	NA	NA	NA	NA	NA	NA	NA	NA	NA	NA	NA	NA	NA	NA	NA	NA	NA	NA	NA	NA	NA	NA	NA	4.69021	0.0038991	2.39529e-05	NA	NA	NA	NA	NA	NA
cg20261366	NA	NA	NA	NA	NA	NA	NA	NA	NA	NA	NA	NA	NA	NA	NA	NA	NA	NA	NA	NA	NA	NA	NA	NA	3.65972	0.0273101	0.000473342	NA	NA	NA	NA	NA	NA
cg20267521	NA	NA	NA	NA	NA	NA	NA	NA	NA	NA	NA	NA	NA	NA	NA	NA	NA	NA	NA	NA	NA	NA	NA	NA	3.97573	0.0191066	0.000192418	NA	NA	NA	NA	NA	NA
cg20272979	4.20086	0.0126409	0.000191778	NA	NA	NA	NA	NA	NA	NA	NA	NA	NA	NA	NA	NA	NA	NA	NA	NA	NA	NA	NA	NA	NA	NA	NA	NA	NA	NA	NA	NA	NA
cg20288000	4.20186	0.0301801	0.000191236	NA	NA	NA	NA	NA	NA	NA	NA	NA	NA	NA	NA	NA	NA	NA	NA	NA	NA	NA	NA	NA	4.7218	0.0444054	2.18193e-05	NA	NA	NA	NA	NA	NA
cg20291855	NA	NA	NA	NA	NA	NA	NA	NA	NA	NA	NA	NA	NA	NA	NA	NA	NA	NA	NA	NA	NA	NA	NA	NA	3.95414	0.0359881	0.000204726	NA	NA	NA	NA	NA	NA
cg20295442	NA	NA	NA	NA	NA	NA	NA	NA	NA	NA	NA	NA	NA	NA	NA	NA	NA	NA	5.55231	0.0419004	5.9577e-06	NA	NA	NA	NA	NA	NA	NA	NA	NA	NA	NA	NA
cg20303075	4.50093	0.018029	8.17456e-05	NA	NA	NA	NA	NA	NA	NA	NA	NA	NA	NA	NA	NA	NA	NA	NA	NA	NA	NA	NA	NA	4.16686	0.0203706	0.00011084	NA	NA	NA	NA	NA	NA
cg20309703	NA	NA	NA	NA	NA	NA	NA	NA	NA	NA	NA	NA	NA	NA	NA	NA	NA	NA	NA	NA	NA	NA	NA	NA	4.36649	0.01138	6.19976e-05	NA	NA	NA	NA	NA	NA
cg20334849	NA	NA	NA	NA	NA	NA	NA	NA	NA	NA	NA	NA	NA	NA	NA	NA	NA	NA	NA	NA	NA	NA	NA	NA	3.63523	0.00619335	0.000507186	NA	NA	NA	NA	NA	NA
cg20384898	4.81242	0.0406834	3.33311e-05	NA	NA	NA	NA	NA	NA	NA	NA	NA	NA	NA	NA	NA	NA	NA	NA	NA	NA	NA	NA	NA	NA	NA	NA	NA	NA	NA	NA	NA	NA
cg20387272	NA	NA	NA	NA	NA	NA	NA	NA	NA	NA	NA	NA	NA	NA	NA	NA	NA	NA	NA	NA	NA	NA	NA	NA	4.8677	0.0267957	1.4165e-05	NA	NA	NA	NA	NA	NA
cg20396510	4.99831	0.0168874	1.94203e-05	NA	NA	NA	NA	NA	NA	NA	NA	NA	NA	NA	NA	NA	NA	NA	NA	NA	NA	NA	NA	NA	4.70985	0.00819385	2.26031e-05	NA	NA	NA	NA	NA	NA
cg20399616	4.67643	0.0277343	4.93784e-05	NA	NA	NA	NA	NA	NA	NA	NA	NA	NA	NA	NA	NA	NA	NA	NA	NA	NA	NA	NA	NA	4.1393	0.00340456	0.000120053	NA	NA	NA	NA	NA	NA
cg20410381	NA	NA	NA	NA	NA	NA	NA	NA	NA	NA	NA	NA	NA	NA	NA	NA	NA	NA	NA	NA	NA	NA	NA	NA	4.07889	0.0120393	0.000142962	NA	NA	NA	NA	NA	NA
cg20415809	NA	NA	NA	NA	NA	NA	NA	NA	NA	NA	NA	NA	NA	NA	NA	NA	NA	NA	NA	NA	NA	NA	NA	NA	4.30915	0.0409776	7.32918e-05	NA	NA	NA	NA	NA	NA
cg20490031	4.99202	0.0123943	1.97792e-05	NA	NA	NA	NA	NA	NA	NA	NA	NA	NA	NA	NA	NA	NA	NA	NA	NA	NA	NA	NA	NA	3.76241	0.00420749	0.00035393	NA	NA	NA	NA	NA	NA
cg20516472	NA	NA	NA	NA	NA	NA	NA	NA	NA	NA	NA	NA	NA	NA	NA	NA	NA	NA	NA	NA	NA	NA	NA	NA	4.06134	0.0123885	0.000150389	NA	NA	NA	NA	NA	NA
cg20544372	5.20295	0.0227638	1.06775e-05	NA	NA	NA	NA	NA	NA	NA	NA	NA	NA	NA	NA	NA	NA	NA	NA	NA	NA	NA	NA	NA	4.85541	0.0412531	1.46905e-05	NA	NA	NA	NA	NA	NA
cg20559403	NA	NA	NA	NA	NA	NA	NA	NA	NA	NA	NA	NA	NA	NA	NA	NA	NA	NA	NA	NA	NA	NA	NA	NA	4.71751	0.0357859	2.20976e-05	NA	NA	NA	NA	NA	NA
cg20598921	NA	NA	NA	NA	NA	NA	NA	NA	NA	NA	NA	NA	NA	NA	NA	NA	NA	NA	NA	NA	NA	NA	NA	NA	3.59286	0.020121	0.00057142	NA	NA	NA	NA	NA	NA
cg20643952	NA	NA	NA	NA	NA	NA	NA	NA	NA	NA	NA	NA	NA	NA	NA	NA	NA	NA	NA	NA	NA	NA	NA	NA	3.56837	0.0385969	0.000612082	NA	NA	NA	NA	NA	NA
cg20747449	NA	NA	NA	NA	NA	NA	NA	NA	NA	NA	NA	NA	NA	NA	NA	NA	NA	NA	NA	NA	NA	NA	NA	NA	5.3158	0.00802182	3.72394e-06	NA	NA	NA	NA	NA	NA
cg20772300	NA	NA	NA	NA	NA	NA	NA	NA	NA	NA	NA	NA	NA	NA	NA	NA	NA	NA	NA	NA	NA	NA	NA	NA	3.89561	0.0379871	0.00024211	NA	NA	NA	NA	NA	NA
cg20776543	4.69919	0.0414683	4.62414e-05	NA	NA	NA	NA	NA	NA	NA	NA	NA	NA	NA	NA	NA	NA	NA	NA	NA	NA	NA	NA	NA	3.84145	0.00879097	0.000282626	NA	NA	NA	NA	NA	NA
cg20789483	NA	NA	NA	NA	NA	NA	NA	NA	NA	NA	NA	NA	NA	NA	NA	NA	NA	NA	NA	NA	NA	NA	NA	NA	4.31299	0.029264	7.24765e-05	NA	NA	NA	NA	NA	NA
cg20801007	NA	NA	NA	NA	NA	NA	NA	NA	NA	NA	NA	NA	NA	NA	NA	NA	NA	NA	NA	NA	NA	NA	NA	NA	3.77724	0.0266602	0.00033932	NA	NA	NA	NA	NA	NA
cg20812973	5.19808	0.0470325	1.08311e-05	NA	NA	NA	NA	NA	NA	NA	NA	NA	NA	NA	NA	NA	NA	NA	NA	NA	NA	NA	NA	NA	NA	NA	NA	NA	NA	NA	NA	NA	NA
cg20817363	4.527	0.0473227	7.58664e-05	NA	NA	NA	NA	NA	NA	NA	NA	NA	NA	NA	NA	NA	NA	NA	NA	NA	NA	NA	NA	NA	4.0716	0.010508	0.000146001	NA	NA	NA	NA	NA	NA
cg20820767	NA	NA	NA	NA	NA	NA	NA	NA	NA	NA	NA	NA	NA	NA	NA	NA	NA	NA	NA	NA	NA	NA	NA	NA	3.5941	0.04468	0.000569436	NA	NA	NA	NA	NA	NA
cg20826671	NA	NA	NA	NA	NA	NA	NA	NA	NA	NA	NA	NA	NA	NA	NA	NA	NA	NA	NA	NA	NA	NA	NA	NA	3.70996	0.0207109	0.000410679	NA	NA	NA	NA	NA	NA
cg20841906	NA	NA	NA	NA	NA	NA	NA	NA	NA	NA	NA	NA	NA	NA	NA	NA	NA	NA	NA	NA	NA	NA	NA	NA	3.92818	0.0313499	0.00022055	NA	NA	NA	NA	NA	NA
cg20896113	NA	NA	NA	NA	NA	NA	NA	NA	NA	NA	NA	NA	NA	NA	NA	NA	NA	NA	NA	NA	NA	NA	NA	NA	3.71375	0.0129404	0.0004063	NA	NA	NA	NA	NA	NA
cg20932721	4.16541	0.0133912	0.000211918	NA	NA	NA	NA	NA	NA	NA	NA	NA	NA	NA	NA	NA	NA	NA	NA	NA	NA	NA	NA	NA	NA	NA	NA	NA	NA	NA	NA	NA	NA
cg20933109	4.16531	0.0128434	0.000211979	NA	NA	NA	NA	NA	NA	NA	NA	NA	NA	NA	NA	NA	NA	NA	NA	NA	NA	NA	NA	NA	NA	NA	NA	NA	NA	NA	NA	NA	NA
cg20935483	NA	NA	NA	NA	NA	NA	NA	NA	NA	NA	NA	NA	NA	NA	NA	NA	NA	NA	NA	NA	NA	NA	NA	NA	4.99012	0.0199373	9.84572e-06	NA	NA	NA	NA	NA	NA
cg20939723	NA	NA	NA	NA	NA	NA	NA	NA	NA	NA	NA	NA	NA	NA	NA	NA	NA	NA	NA	NA	NA	NA	NA	NA	3.60626	0.0265755	0.000550288	NA	NA	NA	NA	NA	NA
cg20962500	NA	NA	NA	NA	NA	NA	NA	NA	NA	NA	NA	NA	NA	NA	NA	NA	NA	NA	NA	NA	NA	NA	NA	NA	3.59179	0.0489544	0.000573139	NA	NA	NA	NA	NA	NA
cg20972199	4.34661	0.0144179	0.000126942	NA	NA	NA	NA	NA	NA	NA	NA	NA	NA	NA	NA	NA	NA	NA	NA	NA	NA	NA	NA	NA	4.32289	0.0365808	7.04142e-05	NA	NA	NA	NA	NA	NA
cg20982412	NA	NA	NA	NA	NA	NA	NA	NA	NA	NA	NA	NA	NA	NA	NA	NA	NA	NA	NA	NA	NA	NA	NA	NA	3.61464	0.0305081	0.000537466	NA	NA	NA	NA	NA	NA
cg21001198	NA	NA	NA	NA	NA	NA	NA	NA	NA	NA	NA	NA	9.1112	0.0208819	1.23248e-06	NA	NA	NA	NA	NA	NA	NA	NA	NA	4.06181	0.0197012	0.000150184	NA	NA	NA	NA	NA	NA
cg21047823	NA	NA	NA	NA	NA	NA	NA	NA	NA	NA	NA	NA	NA	NA	NA	NA	NA	NA	NA	NA	NA	NA	NA	NA	3.65094	0.0325436	0.000485221	NA	NA	NA	NA	NA	NA
cg21108220	NA	NA	NA	NA	NA	NA	NA	NA	NA	NA	NA	NA	NA	NA	NA	NA	NA	NA	NA	NA	NA	NA	NA	NA	3.59831	0.0390747	0.000562729	NA	NA	NA	NA	NA	NA
cg21116457	-4.16035	0.046443	0.000214955	NA	NA	NA	NA	NA	NA	NA	NA	NA	NA	NA	NA	NA	NA	NA	NA	NA	NA	NA	NA	NA	NA	NA	NA	NA	NA	NA	NA	NA	NA
cg21118367	4.26092	0.0178385	0.000161851	NA	NA	NA	NA	NA	NA	NA	NA	NA	NA	NA	NA	NA	NA	NA	NA	NA	NA	NA	NA	NA	NA	NA	NA	NA	NA	NA	NA	NA	NA
cg21163960	4.83563	0.0193983	3.11633e-05	NA	NA	NA	NA	NA	NA	NA	NA	NA	NA	NA	NA	NA	NA	NA	NA	NA	NA	NA	NA	NA	NA	NA	NA	NA	NA	NA	NA	NA	NA
cg21176629	NA	NA	NA	NA	NA	NA	NA	NA	NA	NA	NA	NA	NA	NA	NA	NA	NA	NA	NA	NA	NA	NA	NA	NA	4.43344	0.023651	5.09717e-05	NA	NA	NA	NA	NA	NA
cg21176643	4.07944	0.0285213	0.000269763	NA	NA	NA	NA	NA	NA	NA	NA	NA	NA	NA	NA	NA	NA	NA	NA	NA	NA	NA	NA	NA	NA	NA	NA	NA	NA	NA	NA	NA	NA
cg21181391	NA	NA	NA	NA	NA	NA	NA	NA	NA	NA	NA	NA	NA	NA	NA	NA	NA	NA	NA	NA	NA	NA	NA	NA	4.68767	0.0165211	2.41336e-05	NA	NA	NA	NA	NA	NA
cg21184629	4.44609	0.0449447	9.56187e-05	NA	NA	NA	NA	NA	NA	NA	NA	NA	NA	NA	NA	NA	NA	NA	NA	NA	NA	NA	NA	NA	NA	NA	NA	NA	NA	NA	NA	NA	NA
cg21189727	4.30103	0.0256236	0.000144472	NA	NA	NA	NA	NA	NA	NA	NA	NA	NA	NA	NA	NA	NA	NA	NA	NA	NA	NA	NA	NA	4.73637	0.0158791	2.08992e-05	NA	NA	NA	NA	NA	NA
cg21194776	4.13427	0.0429196	0.000231307	NA	NA	NA	NA	NA	NA	NA	NA	NA	NA	NA	NA	NA	NA	NA	NA	NA	NA	NA	NA	NA	NA	NA	NA	NA	NA	NA	NA	NA	NA
cg21214521	NA	NA	NA	NA	NA	NA	NA	NA	NA	NA	NA	NA	NA	NA	NA	NA	NA	NA	NA	NA	NA	NA	NA	NA	4.5066	0.033073	4.11301e-05	NA	NA	NA	NA	NA	NA
cg21244880	NA	NA	NA	NA	NA	NA	NA	NA	NA	NA	NA	NA	NA	NA	NA	NA	NA	NA	NA	NA	NA	NA	NA	NA	4.0878	0.0124072	0.000139331	NA	NA	NA	NA	NA	NA
cg21250978	4.46632	0.0202265	9.02509e-05	NA	NA	NA	NA	NA	NA	NA	NA	NA	NA	NA	NA	NA	NA	NA	NA	NA	NA	NA	NA	NA	NA	NA	NA	NA	NA	NA	NA	NA	NA
cg21269330	NA	NA	NA	NA	NA	NA	NA	NA	NA	NA	NA	NA	NA	NA	NA	NA	NA	NA	NA	NA	NA	5.09596	0.0340862	6.43244e-06	NA	NA	NA	NA	NA	NA	NA	NA	NA
cg21269897	4.49387	0.00649096	8.34152e-05	NA	NA	NA	NA	NA	NA	NA	NA	NA	NA	NA	NA	NA	NA	NA	NA	NA	NA	NA	NA	NA	4.30492	0.00372725	7.42022e-05	NA	NA	NA	NA	NA	NA
cg21347053	4.18251	0.0167146	0.000201955	NA	NA	NA	NA	NA	NA	NA	NA	NA	NA	NA	NA	NA	NA	NA	NA	NA	NA	NA	NA	NA	3.71365	0.0457889	0.000406408	NA	NA	NA	NA	NA	NA
cg21383810	NA	NA	NA	NA	NA	NA	NA	NA	NA	NA	NA	NA	NA	NA	NA	NA	NA	NA	NA	NA	NA	NA	NA	NA	3.67151	0.0349343	0.000457844	NA	NA	NA	NA	NA	NA
cg21425842	5.19591	0.0090618	1.09003e-05	NA	NA	NA	NA	NA	NA	NA	NA	NA	NA	NA	NA	NA	NA	NA	NA	NA	NA	NA	NA	NA	4.9861	0.00354033	9.96422e-06	NA	NA	NA	NA	NA	NA
cg21450723	4.2158	0.0139442	0.00018386	NA	NA	NA	NA	NA	NA	NA	NA	NA	NA	NA	NA	NA	NA	NA	NA	NA	NA	NA	NA	NA	NA	NA	NA	NA	NA	NA	NA	NA	NA
cg21502255	-4.2719	0.00768343	0.000156898	NA	NA	NA	NA	NA	NA	NA	NA	NA	NA	NA	NA	NA	NA	NA	NA	NA	NA	NA	NA	NA	NA	NA	NA	NA	NA	NA	NA	NA	NA
cg21502786	NA	NA	NA	NA	NA	NA	NA	NA	NA	NA	NA	NA	NA	NA	NA	NA	NA	NA	NA	NA	NA	NA	NA	NA	3.60446	0.04074	0.000553086	NA	NA	NA	NA	NA	NA
cg21517436	NA	NA	NA	NA	NA	NA	NA	NA	NA	NA	NA	NA	NA	NA	NA	NA	NA	NA	NA	NA	NA	NA	NA	NA	3.81407	0.0203444	0.000305568	NA	NA	NA	NA	NA	NA
cg21573047	5.19078	0.0147092	1.10653e-05	NA	NA	NA	NA	NA	NA	NA	NA	NA	NA	NA	NA	NA	NA	NA	NA	NA	NA	NA	NA	NA	4.56545	0.0276829	3.45977e-05	NA	NA	NA	NA	NA	NA
cg21575198	NA	NA	NA	NA	NA	NA	NA	NA	NA	NA	NA	NA	NA	NA	NA	NA	NA	NA	NA	NA	NA	NA	NA	NA	-3.41951	0.0266448	8.10675e-05	NA	NA	NA	NA	NA	NA
cg21575509	5.17381	0.0338165	1.16292e-05	NA	NA	NA	NA	NA	NA	NA	NA	NA	NA	NA	NA	NA	NA	NA	NA	NA	NA	NA	NA	NA	4.62489	0.0460068	2.90434e-05	NA	NA	NA	NA	NA	NA
cg21577049	4.60145	0.0345438	6.12719e-05	NA	NA	NA	NA	NA	NA	NA	NA	NA	NA	NA	NA	NA	NA	NA	NA	NA	NA	NA	NA	NA	4.22194	0.0146195	9.44685e-05	NA	NA	NA	NA	NA	NA
cg21582831	4.61804	0.0237585	5.84176e-05	NA	NA	NA	NA	NA	NA	NA	NA	NA	NA	NA	NA	NA	NA	NA	NA	NA	NA	NA	NA	NA	NA	NA	NA	NA	NA	NA	NA	NA	NA
cg21591486	NA	NA	NA	NA	NA	NA	NA	NA	NA	NA	NA	NA	NA	NA	NA	NA	NA	NA	NA	NA	NA	NA	NA	NA	4.53915	0.000991329	3.73796e-05	NA	NA	NA	NA	NA	NA
cg21635917	NA	NA	NA	NA	NA	NA	NA	NA	NA	NA	NA	NA	NA	NA	NA	NA	NA	NA	NA	NA	NA	NA	NA	NA	4.14313	0.00854296	0.000118728	NA	NA	NA	NA	NA	NA
cg21685266	NA	NA	NA	NA	NA	NA	NA	NA	NA	NA	NA	NA	NA	NA	NA	NA	NA	NA	NA	NA	NA	NA	NA	NA	5.11159	0.0104474	6.85633e-06	NA	NA	NA	NA	NA	NA
cg21701379	NA	NA	NA	NA	NA	NA	NA	NA	NA	NA	NA	NA	NA	NA	NA	NA	NA	NA	NA	NA	NA	NA	NA	NA	3.61152	0.0175592	0.000542215	NA	NA	NA	NA	NA	NA
cg21772509	NA	NA	NA	NA	NA	NA	NA	NA	NA	NA	NA	NA	NA	NA	NA	NA	NA	NA	NA	NA	NA	NA	NA	NA	3.86756	0.00535238	0.00026232	NA	NA	NA	NA	NA	NA
cg21781600	NA	NA	NA	NA	NA	NA	NA	NA	NA	NA	NA	NA	NA	NA	NA	NA	NA	NA	NA	NA	NA	NA	NA	NA	3.70524	0.04701	0.000416201	NA	NA	NA	NA	NA	NA
cg21813377	NA	NA	NA	NA	NA	NA	NA	NA	NA	NA	NA	NA	NA	NA	NA	NA	NA	NA	NA	NA	NA	NA	NA	NA	3.96359	0.0463807	0.000199248	NA	NA	NA	NA	NA	NA
cg21858255	6.1793	0.0186386	5.93478e-07	NA	NA	NA	NA	NA	NA	NA	NA	NA	NA	NA	NA	NA	NA	NA	NA	NA	NA	NA	NA	NA	5.51732	0.00637445	2.03473e-06	NA	NA	NA	NA	NA	NA
cg21868134	NA	NA	NA	NA	NA	NA	NA	NA	NA	NA	NA	NA	NA	NA	NA	NA	NA	NA	NA	NA	NA	NA	NA	NA	3.95827	0.0241855	0.000202313	NA	NA	NA	NA	NA	NA
cg21885251	NA	NA	NA	NA	NA	NA	NA	NA	NA	NA	NA	NA	NA	NA	NA	NA	NA	NA	NA	NA	NA	NA	NA	NA	3.60778	0.0212611	0.000547949	NA	NA	NA	NA	NA	NA
cg21886425	NA	NA	NA	NA	NA	NA	NA	NA	NA	NA	NA	NA	NA	NA	NA	NA	NA	NA	NA	NA	NA	NA	NA	NA	3.80965	0.048517	0.000309435	NA	NA	NA	NA	NA	NA
cg21889472	NA	NA	NA	NA	NA	NA	NA	NA	NA	NA	NA	NA	NA	NA	NA	NA	NA	NA	NA	NA	NA	NA	NA	NA	4.15947	0.0129136	0.00011324	NA	NA	NA	NA	NA	NA
cg21899596	4.47311	0.0110968	8.85176e-05	NA	NA	NA	NA	NA	NA	NA	NA	NA	NA	NA	NA	NA	NA	NA	NA	NA	NA	NA	NA	NA	4.14185	0.0258272	0.000119168	NA	NA	NA	NA	NA	NA
cg21901946	NA	NA	NA	NA	NA	NA	NA	NA	NA	NA	NA	NA	NA	NA	NA	NA	NA	NA	NA	NA	NA	NA	NA	NA	3.73886	0.00819495	0.000378387	NA	NA	NA	NA	NA	NA
cg21921384	4.99513	0.00910689	1.96011e-05	NA	NA	NA	NA	NA	NA	NA	NA	NA	NA	NA	NA	NA	NA	NA	NA	NA	NA	NA	NA	NA	4.95172	0.0201541	1.10369e-05	NA	NA	NA	NA	NA	NA
cg21951457	NA	NA	NA	NA	NA	NA	NA	NA	NA	NA	NA	NA	NA	NA	NA	NA	NA	NA	NA	NA	NA	NA	NA	NA	3.59194	0.00946839	0.000572894	NA	NA	NA	NA	NA	NA
cg21968580	NA	NA	NA	NA	NA	NA	NA	NA	NA	NA	NA	NA	NA	NA	NA	NA	NA	NA	NA	NA	NA	NA	NA	NA	4.60722	0.0485521	3.05949e-05	NA	NA	NA	NA	NA	NA
cg21984645	4.50332	0.0171191	8.11889e-05	NA	NA	NA	NA	NA	NA	NA	NA	NA	NA	NA	NA	NA	NA	NA	NA	NA	NA	NA	NA	NA	NA	NA	NA	NA	NA	NA	NA	NA	NA
cg21988119	5.67626	0.0183686	2.64685e-06	NA	NA	NA	NA	NA	NA	NA	NA	NA	NA	NA	NA	NA	NA	NA	NA	NA	NA	NA	NA	NA	5.60035	0.0382245	1.58531e-06	NA	NA	NA	NA	NA	NA
cg22030457	NA	NA	NA	NA	NA	NA	NA	NA	NA	NA	NA	NA	NA	NA	NA	NA	NA	NA	NA	NA	NA	NA	NA	NA	3.82193	0.00424205	0.000298798	NA	NA	NA	NA	NA	NA
cg22054191	NA	NA	NA	NA	NA	NA	NA	NA	NA	NA	NA	NA	NA	NA	NA	NA	NA	NA	NA	NA	NA	NA	NA	NA	3.82511	0.0253064	0.000296102	NA	NA	NA	NA	NA	NA
cg22060611	4.73674	0.0246959	4.14894e-05	NA	NA	NA	NA	NA	NA	NA	NA	NA	NA	NA	NA	NA	NA	NA	NA	NA	NA	NA	NA	NA	NA	NA	NA	NA	NA	NA	NA	NA	NA
cg22074858	5.09552	0.0367379	1.46229e-05	NA	NA	NA	5.99287	0.0457651	1.40513e-05	NA	NA	NA	NA	NA	NA	NA	NA	NA	NA	NA	NA	NA	NA	NA	NA	NA	NA	NA	NA	NA	NA	NA	NA
cg22135105	NA	NA	NA	NA	NA	NA	NA	NA	NA	NA	NA	NA	NA	NA	NA	NA	NA	NA	NA	NA	NA	NA	NA	NA	3.61244	0.0155432	0.000540808	NA	NA	NA	NA	NA	NA
cg22191981	NA	NA	NA	NA	NA	NA	NA	NA	NA	NA	NA	NA	NA	NA	NA	NA	NA	NA	NA	NA	NA	NA	NA	NA	3.87882	0.0247983	0.000254014	NA	NA	NA	NA	NA	NA
cg22196952	4.83482	0.0379557	3.12364e-05	NA	NA	NA	NA	NA	NA	NA	NA	NA	NA	NA	NA	NA	NA	NA	NA	NA	NA	NA	NA	NA	4.5102	0.0116856	4.06978e-05	NA	NA	NA	NA	NA	NA
cg22250498	4.10292	0.0165847	0.000252586	NA	NA	NA	NA	NA	NA	NA	NA	NA	NA	NA	NA	NA	NA	NA	NA	NA	NA	NA	NA	NA	NA	NA	NA	NA	NA	NA	NA	NA	NA
cg22280238	4.19204	0.0164927	0.000196603	NA	NA	NA	NA	NA	NA	NA	NA	NA	NA	NA	NA	NA	NA	NA	NA	NA	NA	NA	NA	NA	NA	NA	NA	NA	NA	NA	NA	NA	NA
cg22287064	NA	NA	NA	NA	NA	NA	NA	NA	NA	NA	NA	NA	NA	NA	NA	NA	NA	NA	NA	NA	NA	NA	NA	NA	3.65343	0.0274031	0.00048182	NA	NA	NA	NA	NA	NA
cg22336806	4.48996	0.0319397	8.43533e-05	NA	NA	NA	NA	NA	NA	NA	NA	NA	NA	NA	NA	NA	NA	NA	NA	NA	NA	NA	NA	NA	NA	NA	NA	NA	NA	NA	NA	NA	NA
cg22351924	NA	NA	NA	NA	NA	NA	NA	NA	NA	NA	NA	NA	NA	NA	NA	NA	NA	NA	NA	NA	NA	NA	NA	NA	3.62085	0.0254585	0.000528153	NA	NA	NA	NA	NA	NA
cg22358102	NA	NA	NA	NA	NA	NA	NA	NA	NA	NA	NA	NA	NA	NA	NA	NA	NA	NA	NA	NA	NA	NA	NA	NA	4.68561	0.0404502	2.42805e-05	NA	NA	NA	NA	NA	NA
cg22361413	5.96703	0.028154	1.11675e-06	NA	NA	NA	NA	NA	NA	NA	NA	NA	NA	NA	NA	NA	NA	NA	NA	NA	NA	NA	NA	NA	NA	NA	NA	NA	NA	NA	NA	NA	NA
cg22370379	4.11287	0.00932278	0.000245631	NA	NA	NA	NA	NA	NA	NA	NA	NA	NA	NA	NA	NA	NA	NA	NA	NA	NA	NA	NA	NA	4.46	0.0279903	4.71554e-05	NA	NA	NA	NA	NA	NA
cg22399133	NA	NA	NA	NA	NA	NA	NA	NA	NA	NA	NA	NA	NA	NA	NA	NA	NA	NA	NA	NA	NA	NA	NA	NA	4.25864	0.0103534	8.49078e-05	NA	NA	NA	NA	NA	NA
cg22469020	NA	NA	NA	NA	NA	NA	NA	NA	NA	NA	NA	NA	NA	NA	NA	NA	NA	NA	NA	NA	NA	NA	NA	NA	3.87767	0.0259287	0.000254853	NA	NA	NA	NA	NA	NA
cg22488158	NA	NA	NA	NA	NA	NA	NA	NA	NA	NA	NA	NA	NA	NA	NA	NA	NA	NA	NA	NA	NA	NA	NA	NA	4.00048	0.0394762	0.000179205	NA	NA	NA	NA	NA	NA
cg22504175	NA	NA	NA	NA	NA	NA	NA	NA	NA	NA	NA	NA	NA	NA	NA	NA	NA	NA	NA	NA	NA	NA	NA	NA	4.02825	0.0255401	0.000165439	NA	NA	NA	NA	NA	NA
cg22535307	5.06584	0.0438793	1.59474e-05	NA	NA	NA	NA	NA	NA	NA	NA	NA	NA	NA	NA	NA	NA	NA	NA	NA	NA	NA	NA	NA	4.57152	0.0427129	3.39856e-05	NA	NA	NA	NA	NA	NA
cg22538871	NA	NA	NA	NA	NA	NA	NA	NA	NA	NA	NA	NA	NA	NA	NA	NA	NA	NA	NA	NA	NA	NA	NA	NA	4.64505	0.0229872	2.7367e-05	NA	NA	NA	NA	NA	NA
cg22577136	NA	NA	NA	NA	NA	NA	NA	NA	NA	NA	NA	NA	NA	NA	NA	NA	NA	NA	NA	NA	NA	NA	NA	NA	3.76468	0.0250086	0.000351651	NA	NA	NA	NA	NA	NA
cg22603247	NA	NA	NA	NA	NA	NA	NA	NA	NA	NA	NA	NA	NA	NA	NA	NA	NA	NA	NA	NA	NA	NA	NA	NA	3.73792	0.0224811	0.000379396	NA	NA	NA	NA	NA	NA
cg22614142	NA	NA	NA	NA	NA	NA	NA	NA	NA	NA	NA	NA	NA	NA	NA	NA	NA	NA	NA	NA	NA	NA	NA	NA	3.72936	0.0327661	0.000388715	NA	NA	NA	NA	NA	NA
cg22621272	NA	NA	NA	NA	NA	NA	NA	NA	NA	NA	NA	NA	NA	NA	NA	NA	NA	NA	NA	NA	NA	NA	NA	NA	3.63435	0.0313379	0.000508449	NA	NA	NA	NA	NA	NA
cg22630939	NA	NA	NA	NA	NA	NA	NA	NA	NA	NA	NA	NA	NA	NA	NA	NA	NA	NA	NA	NA	NA	NA	NA	NA	7.84162	0.0237853	1.77162e-09	NA	NA	NA	NA	NA	NA
cg22658758	4.27864	0.0426108	0.000153936	NA	NA	NA	NA	NA	NA	NA	NA	NA	NA	NA	NA	NA	NA	NA	NA	NA	NA	NA	NA	NA	NA	NA	NA	NA	NA	NA	NA	NA	NA
cg22677858	NA	NA	NA	NA	NA	NA	NA	NA	NA	NA	NA	NA	NA	NA	NA	NA	NA	NA	NA	NA	NA	NA	NA	NA	3.7327	0.000936154	0.000385062	NA	NA	NA	NA	NA	NA
cg22685975	NA	NA	NA	NA	NA	NA	NA	NA	NA	NA	NA	NA	NA	NA	NA	NA	NA	NA	NA	NA	NA	NA	NA	NA	4.2974	0.00174405	7.58448e-05	NA	NA	NA	NA	NA	NA
cg22737001	4.73461	0.0149093	4.17463e-05	NA	NA	NA	NA	NA	NA	NA	NA	NA	NA	NA	NA	NA	NA	NA	NA	NA	NA	NA	NA	NA	5.55375	0.0154248	1.82377e-06	NA	NA	NA	NA	NA	NA
cg22771603	5.94061	0.0207236	1.20802e-06	NA	NA	NA	NA	NA	NA	NA	NA	NA	NA	NA	NA	NA	NA	NA	NA	NA	NA	NA	NA	NA	NA	NA	NA	NA	NA	NA	NA	NA	NA
cg22801799	NA	NA	NA	NA	NA	NA	NA	NA	NA	NA	NA	NA	NA	NA	NA	NA	NA	NA	NA	NA	NA	NA	NA	NA	3.84616	0.0477687	0.000278849	NA	NA	NA	NA	NA	NA
cg22808478	NA	NA	NA	NA	NA	NA	NA	NA	NA	NA	NA	NA	NA	NA	NA	NA	NA	NA	NA	NA	NA	NA	NA	NA	NA	NA	NA	5.88882	0.0240592	1.7895e-05	NA	NA	NA
cg22880957	NA	NA	NA	NA	NA	NA	NA	NA	NA	NA	NA	NA	NA	NA	NA	NA	NA	NA	NA	NA	NA	NA	NA	NA	3.70158	0.0431315	0.000420538	NA	NA	NA	NA	NA	NA
cg22889755	NA	NA	NA	NA	NA	NA	NA	NA	NA	NA	NA	NA	NA	NA	NA	NA	NA	NA	NA	NA	NA	NA	NA	NA	3.78163	0.0256655	0.000335119	NA	NA	NA	NA	NA	NA
cg22903773	NA	NA	NA	NA	NA	NA	NA	NA	NA	NA	NA	NA	NA	NA	NA	NA	NA	NA	NA	NA	NA	NA	NA	NA	3.72344	0.00628785	0.000395302	NA	NA	NA	NA	NA	NA
cg22932313	4.31666	0.0386169	0.000138209	NA	NA	NA	NA	NA	NA	NA	NA	NA	NA	NA	NA	NA	NA	NA	NA	NA	NA	NA	NA	NA	3.85871	0.0106716	0.000269034	NA	NA	NA	NA	NA	NA
cg22991959	5.2312	0.0425799	9.82889e-06	NA	NA	NA	NA	NA	NA	NA	NA	NA	NA	NA	NA	NA	NA	NA	NA	NA	NA	NA	NA	NA	NA	NA	NA	NA	NA	NA	NA	NA	NA
cg23037265	NA	NA	NA	NA	NA	NA	NA	NA	NA	NA	NA	NA	NA	NA	NA	NA	NA	NA	NA	NA	NA	NA	NA	NA	NA	NA	NA	6.3144	0.0310371	6.64671e-06	NA	NA	NA
cg23037321	NA	NA	NA	NA	NA	NA	NA	NA	NA	NA	NA	NA	NA	NA	NA	NA	NA	NA	NA	NA	NA	NA	NA	NA	3.7851	0.0256744	0.000331826	NA	NA	NA	NA	NA	NA
cg23069297	4.61238	0.0461426	5.93765e-05	NA	NA	NA	NA	NA	NA	NA	NA	NA	NA	NA	NA	NA	NA	NA	NA	NA	NA	NA	NA	NA	4.16335	0.0213885	0.000111974	NA	NA	NA	NA	NA	NA
cg23071808	4.25744	0.0472167	0.000163453	NA	NA	NA	NA	NA	NA	NA	NA	NA	NA	NA	NA	NA	NA	NA	NA	NA	NA	NA	NA	NA	NA	NA	NA	NA	NA	NA	NA	NA	NA
cg23117583	NA	NA	NA	NA	NA	NA	NA	NA	NA	NA	NA	NA	NA	NA	NA	NA	NA	NA	NA	NA	NA	NA	NA	NA	3.63853	0.0198117	0.000502503	NA	NA	NA	NA	NA	NA
cg23144681	4.14266	0.0220839	0.000225917	NA	NA	NA	NA	NA	NA	NA	NA	NA	NA	NA	NA	NA	NA	NA	NA	NA	NA	NA	NA	NA	4.54517	0.00387171	3.67234e-05	NA	NA	NA	NA	NA	NA
cg23145794	NA	NA	NA	NA	NA	NA	NA	NA	NA	NA	NA	NA	NA	NA	NA	NA	NA	NA	NA	NA	NA	NA	NA	NA	3.72219	0.0316248	0.000396697	NA	NA	NA	NA	NA	NA
cg23203918	NA	NA	NA	5.25632	0.0354415	1.62563e-09	NA	NA	NA	NA	NA	NA	NA	NA	NA	NA	NA	NA	NA	NA	NA	NA	NA	NA	NA	NA	NA	NA	NA	NA	NA	NA	NA
cg23206888	6.32452	0.0422317	3.8475e-07	NA	NA	NA	NA	NA	NA	NA	NA	NA	NA	NA	NA	NA	NA	NA	NA	NA	NA	NA	NA	NA	NA	NA	NA	NA	NA	NA	NA	NA	NA
cg23217622	4.45184	0.0360538	9.40634e-05	NA	NA	NA	NA	NA	NA	NA	NA	NA	NA	NA	NA	NA	NA	NA	NA	NA	NA	NA	NA	NA	3.63355	0.00215986	0.000509601	NA	NA	NA	NA	NA	NA
cg23222446	NA	NA	NA	NA	NA	NA	NA	NA	NA	NA	NA	NA	NA	NA	NA	NA	NA	NA	NA	NA	NA	NA	NA	NA	3.77871	0.0313106	0.000337909	NA	NA	NA	NA	NA	NA
cg23261919	4.2623	0.0261349	0.000161223	NA	NA	NA	NA	NA	NA	NA	NA	NA	NA	NA	NA	NA	NA	NA	NA	NA	NA	NA	NA	NA	4.16281	0.0299805	0.000112147	NA	NA	NA	NA	NA	NA
cg23324048	NA	NA	NA	NA	NA	NA	NA	NA	NA	NA	NA	NA	NA	NA	NA	NA	NA	NA	NA	NA	NA	NA	NA	NA	4.24752	0.0105832	8.76974e-05	NA	NA	NA	NA	NA	NA
cg23338503	4.15488	0.00351079	0.000218287	NA	NA	NA	NA	NA	NA	NA	NA	NA	NA	NA	NA	NA	NA	NA	NA	NA	NA	NA	NA	NA	4.09423	0.0249901	0.000136767	NA	NA	NA	NA	NA	NA
cg23350106	NA	NA	NA	NA	NA	NA	NA	NA	NA	NA	NA	NA	NA	NA	NA	NA	NA	NA	NA	NA	NA	NA	NA	NA	4.87193	0.0164634	1.39882e-05	NA	NA	NA	NA	NA	NA
cg23369234	NA	NA	NA	NA	NA	NA	NA	NA	NA	NA	NA	NA	NA	NA	NA	NA	NA	NA	NA	NA	NA	NA	NA	NA	3.80916	0.0469464	0.000309869	NA	NA	NA	NA	NA	NA
cg23373978	NA	NA	NA	NA	NA	NA	NA	NA	NA	NA	NA	NA	NA	NA	NA	NA	NA	NA	NA	NA	NA	NA	NA	NA	NA	NA	NA	5.77553	0.00575282	2.32777e-05	NA	NA	NA
cg23409591	NA	NA	NA	NA	NA	NA	NA	NA	NA	NA	NA	NA	NA	NA	NA	NA	NA	NA	NA	NA	NA	NA	NA	NA	3.63064	0.0328749	0.000513793	NA	NA	NA	NA	NA	NA
cg23439966	NA	NA	NA	NA	NA	NA	NA	NA	NA	NA	NA	NA	NA	NA	NA	NA	NA	NA	NA	NA	NA	NA	NA	NA	-3.1939	0.0369947	0.000213523	NA	NA	NA	NA	NA	NA
cg23456689	NA	NA	NA	NA	NA	NA	NA	NA	NA	NA	NA	NA	NA	NA	NA	NA	NA	NA	NA	NA	NA	NA	NA	NA	4.87464	0.0133234	1.38763e-05	5.57389	0.00879903	3.71396e-05	NA	NA	NA
cg23460145	NA	NA	NA	NA	NA	NA	NA	NA	NA	NA	NA	NA	NA	NA	NA	NA	NA	NA	NA	NA	NA	NA	NA	NA	NA	NA	NA	5.69705	0.00519403	2.79234e-05	NA	NA	NA
cg23477967	5.58029	0.0455711	3.51578e-06	NA	NA	NA	NA	NA	NA	NA	NA	NA	NA	NA	NA	NA	NA	NA	NA	NA	NA	NA	NA	NA	NA	NA	NA	NA	NA	NA	NA	NA	NA
cg23554497	4.78339	0.0470636	3.62547e-05	NA	NA	NA	NA	NA	NA	NA	NA	NA	NA	NA	NA	NA	NA	NA	NA	NA	NA	NA	NA	NA	NA	NA	NA	NA	NA	NA	NA	NA	NA
cg23558337	4.686	0.0214843	4.80341e-05	NA	NA	NA	NA	NA	NA	NA	NA	NA	NA	NA	NA	NA	NA	NA	NA	NA	NA	NA	NA	NA	NA	NA	NA	NA	NA	NA	NA	NA	NA
cg23601397	4.37527	0.0226363	0.000117008	NA	NA	NA	NA	NA	NA	NA	NA	NA	NA	NA	NA	NA	NA	NA	NA	NA	NA	NA	NA	NA	4.49174	0.00856318	4.29636e-05	NA	NA	NA	NA	NA	NA
cg23614791	NA	NA	NA	NA	NA	NA	NA	NA	NA	NA	NA	NA	NA	NA	NA	NA	NA	NA	NA	NA	NA	NA	NA	NA	3.81332	0.0138338	0.000306217	NA	NA	NA	NA	NA	NA
cg23618344	4.47426	0.0087102	8.82256e-05	NA	NA	NA	NA	NA	NA	NA	NA	NA	NA	NA	NA	NA	NA	NA	NA	NA	NA	NA	NA	NA	4.12206	0.0170775	0.000126194	NA	NA	NA	NA	NA	NA
cg23632791	NA	NA	NA	NA	NA	NA	NA	NA	NA	NA	NA	NA	NA	NA	NA	NA	NA	NA	NA	NA	NA	NA	NA	NA	3.66596	0.0337956	0.000465086	NA	NA	NA	NA	NA	NA
cg23633010	NA	NA	NA	NA	NA	NA	NA	NA	NA	NA	NA	NA	NA	NA	NA	NA	NA	NA	NA	NA	NA	NA	NA	NA	3.83867	0.0224677	0.000284875	NA	NA	NA	NA	NA	NA
cg23633059	4.96658	0.0213169	2.13007e-05	NA	NA	NA	NA	NA	NA	NA	NA	NA	NA	NA	NA	NA	NA	NA	NA	NA	NA	NA	NA	NA	5.07501	0.0373298	7.64632e-06	NA	NA	NA	NA	NA	NA
cg23636941	NA	NA	NA	NA	NA	NA	NA	NA	NA	NA	NA	NA	NA	NA	NA	NA	NA	NA	NA	NA	NA	NA	NA	NA	4.05276	0.00100608	0.000154155	NA	NA	NA	NA	NA	NA
cg23732725	5.14924	0.0204729	1.24967e-05	NA	NA	NA	NA	NA	NA	NA	NA	NA	NA	NA	NA	NA	NA	NA	NA	NA	NA	NA	NA	NA	5.20127	0.0253094	5.24568e-06	NA	NA	NA	NA	NA	NA
cg23738624	NA	NA	NA	NA	NA	NA	NA	NA	NA	NA	NA	NA	NA	NA	NA	NA	NA	NA	NA	NA	NA	NA	NA	NA	3.58377	0.00631578	0.000586191	NA	NA	NA	NA	NA	NA
cg23791611	NA	NA	NA	NA	NA	NA	NA	NA	NA	NA	NA	NA	NA	NA	NA	NA	NA	NA	NA	NA	NA	NA	NA	NA	4.72181	0.0431956	2.18181e-05	NA	NA	NA	NA	NA	NA
cg23861668	NA	NA	NA	NA	NA	NA	NA	NA	NA	NA	NA	NA	NA	NA	NA	NA	NA	NA	NA	NA	NA	NA	NA	NA	4.63918	0.00337876	2.78448e-05	NA	NA	NA	NA	NA	NA
cg23861803	NA	NA	NA	NA	NA	NA	NA	NA	NA	NA	NA	NA	NA	NA	NA	NA	NA	NA	NA	NA	NA	NA	NA	NA	4.1103	0.0424005	0.00013056	NA	NA	NA	NA	NA	NA
cg23881926	4.26354	0.0136968	0.000160657	NA	NA	NA	NA	NA	NA	NA	NA	NA	NA	NA	NA	NA	NA	NA	NA	NA	NA	NA	NA	NA	4.11416	0.0272394	0.000129108	NA	NA	NA	NA	NA	NA
cg23882658	NA	NA	NA	NA	NA	NA	NA	NA	NA	NA	NA	NA	NA	NA	NA	NA	NA	NA	NA	NA	NA	NA	NA	NA	3.60055	0.0451815	0.000559199	NA	NA	NA	NA	NA	NA
cg23904247	NA	NA	NA	NA	NA	NA	NA	NA	NA	NA	NA	NA	NA	NA	NA	NA	NA	NA	NA	NA	NA	NA	NA	NA	4.07507	0.0163977	0.000144544	NA	NA	NA	NA	NA	NA
cg23930313	5.02831	0.0455454	1.77934e-05	NA	NA	NA	NA	NA	NA	NA	NA	NA	NA	NA	NA	NA	NA	NA	NA	NA	NA	NA	NA	NA	NA	NA	NA	NA	NA	NA	NA	NA	NA
cg23965931	NA	NA	NA	NA	NA	NA	NA	NA	NA	NA	NA	NA	NA	NA	NA	NA	NA	NA	NA	NA	NA	NA	NA	NA	3.92259	0.0282491	0.000224113	NA	NA	NA	NA	NA	NA
cg23967742	4.99693	0.0200185	1.94985e-05	NA	NA	NA	NA	NA	NA	NA	NA	NA	NA	NA	NA	NA	NA	NA	NA	NA	NA	NA	NA	NA	4.64264	0.00796639	2.75628e-05	NA	NA	NA	NA	NA	NA
cg24025538	4.23245	0.0182531	0.000175418	NA	NA	NA	NA	NA	NA	NA	NA	NA	NA	NA	NA	NA	NA	NA	NA	NA	NA	NA	NA	NA	4.35404	0.0246014	6.4294e-05	NA	NA	NA	NA	NA	NA
cg24028202	NA	NA	NA	NA	NA	NA	NA	NA	NA	NA	NA	NA	NA	NA	NA	NA	NA	NA	NA	NA	NA	NA	NA	NA	4.291	0.00803406	7.72742e-05	NA	NA	NA	NA	NA	NA
cg24028634	4.13542	0.0160981	0.000230564	NA	NA	NA	NA	NA	NA	NA	NA	NA	NA	NA	NA	NA	NA	NA	NA	NA	NA	NA	NA	NA	NA	NA	NA	NA	NA	NA	NA	NA	NA
cg24031355	NA	NA	NA	NA	NA	NA	NA	NA	NA	NA	NA	NA	NA	NA	NA	NA	NA	NA	NA	NA	NA	NA	NA	NA	3.78463	0.013022	0.000332272	NA	NA	NA	NA	NA	NA
cg24044052	4.13518	0.0288605	0.000230717	NA	NA	NA	NA	NA	NA	NA	NA	NA	NA	NA	NA	NA	NA	NA	NA	NA	NA	NA	NA	NA	NA	NA	NA	NA	NA	NA	NA	NA	NA
cg24059115	5.09253	0.0294861	1.47511e-05	NA	NA	NA	NA	NA	NA	NA	NA	NA	NA	NA	NA	NA	NA	NA	NA	NA	NA	NA	NA	NA	NA	NA	NA	NA	NA	NA	NA	NA	NA
cg24064055	NA	NA	NA	NA	NA	NA	NA	NA	NA	NA	NA	NA	NA	NA	NA	NA	NA	NA	NA	NA	NA	NA	NA	NA	3.68396	0.016359	0.000442024	NA	NA	NA	NA	NA	NA
cg24068372	NA	NA	NA	NA	NA	NA	NA	NA	NA	NA	NA	NA	NA	NA	NA	NA	NA	NA	NA	NA	NA	NA	NA	NA	5.50581	0.00811965	2.10631e-06	NA	NA	NA	NA	NA	NA
cg24074177	NA	NA	NA	NA	NA	NA	NA	NA	NA	NA	NA	NA	NA	NA	NA	NA	NA	NA	NA	NA	NA	NA	NA	NA	3.64702	0.02648	0.000490608	NA	NA	NA	NA	NA	NA
cg24242823	NA	NA	NA	NA	NA	NA	NA	NA	NA	NA	NA	NA	NA	NA	NA	NA	NA	NA	NA	NA	NA	NA	NA	NA	3.69041	0.0219195	0.000434031	NA	NA	NA	NA	NA	NA
cg24285543	4.16129	0.00470508	0.00021439	NA	NA	NA	NA	NA	NA	NA	NA	NA	NA	NA	NA	NA	NA	NA	NA	NA	NA	NA	NA	NA	4.67601	0.0322799	2.49788e-05	NA	NA	NA	NA	NA	NA
cg24311272	NA	NA	NA	NA	NA	NA	NA	NA	NA	NA	NA	NA	NA	NA	NA	NA	NA	NA	NA	NA	NA	NA	NA	NA	4.43376	0.022023	5.09239e-05	NA	NA	NA	NA	NA	NA
cg24338491	4.2209	0.0142332	0.000181233	NA	NA	NA	NA	NA	NA	NA	NA	NA	NA	NA	NA	NA	NA	NA	NA	NA	NA	NA	NA	NA	NA	NA	NA	NA	NA	NA	NA	NA	NA
cg24344981	4.18461	0.0196807	0.000200765	NA	NA	NA	NA	NA	NA	NA	NA	NA	NA	NA	NA	NA	NA	NA	NA	NA	NA	NA	NA	NA	4.47977	0.0124822	4.44987e-05	NA	NA	NA	NA	NA	NA
cg24366211	NA	NA	NA	NA	NA	NA	NA	NA	NA	NA	NA	NA	NA	NA	NA	NA	NA	NA	NA	NA	NA	NA	NA	NA	3.78974	0.0400238	0.000327477	NA	NA	NA	NA	NA	NA
cg24382527	5.11642	0.0278966	1.37563e-05	NA	NA	NA	NA	NA	NA	NA	NA	NA	NA	NA	NA	NA	NA	NA	NA	NA	NA	NA	NA	NA	4.47206	0.024729	4.55164e-05	NA	NA	NA	NA	NA	NA
cg24387129	NA	NA	NA	NA	NA	NA	5.83404	0.031772	2.03226e-05	NA	NA	NA	NA	NA	NA	NA	NA	NA	NA	NA	NA	NA	NA	NA	NA	NA	NA	NA	NA	NA	NA	NA	NA
cg24388251	4.57121	0.0313189	6.68322e-05	NA	NA	NA	NA	NA	NA	NA	NA	NA	NA	NA	NA	NA	NA	NA	NA	NA	NA	NA	NA	NA	NA	NA	NA	NA	NA	NA	NA	NA	NA
cg24395386	NA	NA	NA	NA	NA	NA	NA	NA	NA	NA	NA	NA	NA	NA	NA	NA	NA	NA	NA	NA	NA	NA	NA	NA	NA	NA	NA	6.43014	0.0154869	5.07441e-06	NA	NA	NA
cg24405179	4.95708	0.0468261	2.18982e-05	NA	NA	NA	NA	NA	NA	NA	NA	NA	NA	NA	NA	NA	NA	NA	NA	NA	NA	NA	NA	NA	4.95434	0.0278217	1.09512e-05	NA	NA	NA	NA	NA	NA
cg24407308	NA	NA	NA	NA	NA	NA	NA	NA	NA	NA	NA	NA	NA	NA	NA	NA	NA	NA	NA	NA	NA	NA	NA	NA	4.18797	0.0384114	0.000104258	NA	NA	NA	NA	NA	NA
cg24426208	NA	NA	NA	NA	NA	NA	NA	NA	NA	NA	NA	NA	NA	NA	NA	NA	NA	NA	NA	NA	NA	NA	NA	NA	4.77255	0.0483565	1.87781e-05	NA	NA	NA	NA	NA	NA
cg24429974	NA	NA	NA	NA	NA	NA	NA	NA	NA	NA	NA	NA	NA	NA	NA	NA	NA	NA	NA	NA	NA	NA	NA	NA	4.35524	0.020907	6.40687e-05	NA	NA	NA	NA	NA	NA
cg24448259	NA	NA	NA	NA	NA	NA	NA	NA	NA	NA	NA	NA	NA	NA	NA	NA	NA	NA	NA	NA	NA	NA	NA	NA	4.56512	0.0475265	3.46314e-05	NA	NA	NA	NA	NA	NA
cg24496841	4.13857	0.046078	0.000228535	NA	NA	NA	NA	NA	NA	NA	NA	NA	NA	NA	NA	NA	NA	NA	NA	NA	NA	NA	NA	NA	NA	NA	NA	NA	NA	NA	NA	NA	NA
cg24577420	NA	NA	NA	NA	NA	NA	NA	NA	NA	NA	NA	NA	NA	NA	NA	NA	NA	NA	NA	NA	NA	NA	NA	NA	4.19506	0.0178564	0.000102136	NA	NA	NA	NA	NA	NA
cg24599017	NA	NA	NA	NA	NA	NA	5.94663	0.0413598	1.56459e-05	NA	NA	NA	NA	NA	NA	NA	NA	NA	NA	NA	NA	NA	NA	NA	NA	NA	NA	NA	NA	NA	NA	NA	NA
cg24630516	4.09374	0.0310808	0.000259173	NA	NA	NA	NA	NA	NA	NA	NA	NA	NA	NA	NA	NA	NA	NA	NA	NA	NA	NA	NA	NA	NA	NA	NA	NA	NA	NA	NA	NA	NA
cg24631482	5.33936	0.0165582	7.15369e-06	NA	NA	NA	NA	NA	NA	NA	NA	NA	NA	NA	NA	NA	NA	NA	NA	NA	NA	NA	NA	NA	4.60451	0.0131727	3.08404e-05	NA	NA	NA	NA	NA	NA
cg24653772	4.09282	0.0309137	0.000259843	NA	NA	NA	NA	NA	NA	NA	NA	NA	NA	NA	NA	NA	NA	NA	NA	NA	NA	NA	NA	NA	NA	NA	NA	NA	NA	NA	NA	NA	NA
cg24669786	NA	NA	NA	NA	NA	NA	NA	NA	NA	NA	NA	NA	NA	NA	NA	NA	NA	NA	NA	NA	NA	NA	NA	NA	3.79769	0.0159002	0.000320156	NA	NA	NA	NA	NA	NA
cg24685006	4.44297	0.0374083	9.64752e-05	NA	NA	NA	NA	NA	NA	NA	NA	NA	NA	NA	NA	NA	NA	NA	NA	NA	NA	NA	NA	NA	NA	NA	NA	NA	NA	NA	NA	NA	NA
cg24696728	NA	NA	NA	NA	NA	NA	NA	NA	NA	NA	NA	NA	NA	NA	NA	NA	NA	NA	NA	NA	NA	NA	NA	NA	3.6871	0.0436199	0.000438123	NA	NA	NA	NA	NA	NA
cg24739382	NA	NA	NA	NA	NA	NA	NA	NA	NA	NA	NA	NA	NA	NA	NA	NA	NA	NA	NA	NA	NA	NA	NA	NA	4.12515	0.0200699	0.00012507	NA	NA	NA	NA	NA	NA
cg24746100	NA	NA	NA	NA	NA	NA	NA	NA	NA	NA	NA	NA	NA	NA	NA	NA	NA	NA	NA	NA	NA	NA	NA	NA	NA	NA	NA	5.68678	0.00646406	2.85961e-05	NA	NA	NA
cg24789348	NA	NA	NA	NA	NA	NA	NA	NA	NA	NA	NA	NA	NA	NA	NA	NA	NA	NA	NA	NA	NA	NA	NA	NA	3.6836	0.0209632	0.000442473	NA	NA	NA	NA	NA	NA
cg24804517	NA	NA	NA	NA	NA	NA	NA	NA	NA	NA	NA	NA	NA	NA	NA	NA	NA	NA	NA	NA	NA	NA	NA	NA	4.19098	0.0332144	0.000103351	NA	NA	NA	NA	NA	NA
cg24805875	NA	NA	NA	NA	NA	NA	NA	NA	NA	NA	NA	NA	NA	NA	NA	NA	NA	NA	NA	NA	NA	NA	NA	NA	3.57565	0.00510989	0.000599715	NA	NA	NA	NA	NA	NA
cg24844534	5.92659	0.0296063	1.25946e-06	NA	NA	NA	NA	NA	NA	NA	NA	NA	NA	NA	NA	NA	NA	NA	NA	NA	NA	NA	NA	NA	5.64876	0.0231497	1.37046e-06	NA	NA	NA	NA	NA	NA
cg24852548	4.71266	0.0308586	4.44777e-05	NA	NA	NA	NA	NA	NA	NA	NA	NA	NA	NA	NA	NA	NA	NA	NA	NA	NA	NA	NA	NA	NA	NA	NA	NA	NA	NA	NA	NA	NA
cg24866784	NA	NA	NA	NA	NA	NA	NA	NA	NA	NA	NA	NA	NA	NA	NA	NA	NA	NA	NA	NA	NA	NA	NA	NA	4.93953	0.0391004	1.14442e-05	NA	NA	NA	NA	NA	NA
cg24893844	NA	NA	NA	NA	NA	NA	NA	NA	NA	NA	NA	NA	NA	NA	NA	NA	NA	NA	NA	NA	NA	NA	NA	NA	4.19441	0.0264541	0.000102329	NA	NA	NA	NA	NA	NA
cg24938632	NA	NA	NA	NA	NA	NA	NA	NA	NA	NA	NA	NA	NA	NA	NA	NA	NA	NA	NA	NA	NA	NA	NA	NA	3.65017	0.033335	0.000486273	NA	NA	NA	NA	NA	NA
cg24971349	NA	NA	NA	NA	NA	NA	NA	NA	NA	NA	NA	NA	NA	NA	NA	NA	NA	NA	NA	NA	NA	NA	NA	NA	3.59183	0.0171545	0.000573079	NA	NA	NA	NA	NA	NA
cg24995014	NA	NA	NA	NA	NA	NA	NA	NA	NA	NA	NA	NA	NA	NA	NA	NA	NA	NA	NA	NA	NA	NA	NA	NA	3.98595	0.0222184	0.000186852	NA	NA	NA	NA	NA	NA
cg24998754	NA	NA	NA	NA	NA	NA	NA	NA	NA	NA	NA	NA	NA	NA	NA	NA	NA	NA	NA	NA	NA	NA	NA	NA	4.00135	0.0192112	0.000178758	NA	NA	NA	NA	NA	NA
cg25026248	4.61554	0.029213	5.88406e-05	NA	NA	NA	NA	NA	NA	NA	NA	NA	NA	NA	NA	NA	NA	NA	NA	NA	NA	NA	NA	NA	NA	NA	NA	NA	NA	NA	NA	NA	NA
cg25046651	NA	NA	NA	NA	NA	NA	NA	NA	NA	NA	NA	NA	NA	NA	NA	NA	NA	NA	NA	NA	NA	NA	NA	NA	4.02832	0.020335	0.000165405	NA	NA	NA	NA	NA	NA
cg25106645	NA	NA	NA	NA	NA	NA	NA	NA	NA	NA	NA	NA	NA	NA	NA	NA	NA	NA	NA	NA	NA	NA	NA	NA	3.64383	0.0142315	0.000495049	NA	NA	NA	NA	NA	NA
cg25208969	5.23463	0.0478631	9.73026e-06	NA	NA	NA	NA	NA	NA	NA	NA	NA	NA	NA	NA	NA	NA	NA	NA	NA	NA	NA	NA	NA	NA	NA	NA	NA	NA	NA	NA	NA	NA
cg25226247	NA	NA	NA	NA	NA	NA	NA	NA	NA	NA	NA	NA	NA	NA	NA	NA	NA	NA	NA	NA	NA	NA	NA	NA	3.67579	0.0426975	0.000452343	NA	NA	NA	NA	NA	NA
cg25232660	NA	NA	NA	NA	NA	NA	NA	NA	NA	NA	NA	NA	NA	NA	NA	NA	NA	NA	NA	NA	NA	NA	NA	NA	4.36544	0.0496936	6.21883e-05	NA	NA	NA	NA	NA	NA
cg25255602	NA	NA	NA	NA	NA	NA	NA	NA	NA	NA	NA	NA	NA	NA	NA	NA	NA	NA	NA	NA	NA	NA	NA	NA	4.18003	0.0235266	0.000106687	NA	NA	NA	NA	NA	NA
cg25264268	NA	NA	NA	NA	NA	NA	NA	NA	NA	NA	NA	NA	NA	NA	NA	NA	NA	NA	NA	NA	NA	NA	NA	NA	3.70597	0.0118674	0.000415339	NA	NA	NA	NA	NA	NA
cg25274503	5.18137	0.0295257	1.13747e-05	NA	NA	NA	NA	NA	NA	NA	NA	NA	NA	NA	NA	NA	NA	NA	NA	NA	NA	NA	NA	NA	NA	NA	NA	NA	NA	NA	NA	NA	NA
cg25307318	4.36453	0.031777	0.000120636	NA	NA	NA	NA	NA	NA	NA	NA	NA	NA	NA	NA	NA	NA	NA	NA	NA	NA	NA	NA	NA	3.59796	0.046695	0.000563278	NA	NA	NA	NA	NA	NA
cg25308354	5.29735	0.0117462	8.09411e-06	NA	NA	NA	NA	NA	NA	NA	NA	NA	NA	NA	NA	NA	NA	NA	NA	NA	NA	NA	NA	NA	5.39198	0.0479796	2.96396e-06	NA	NA	NA	NA	NA	NA
cg25333460	4.28577	0.0209388	0.000150857	NA	NA	NA	NA	NA	NA	NA	NA	NA	NA	NA	NA	NA	NA	NA	NA	NA	NA	NA	NA	NA	NA	NA	NA	NA	NA	NA	NA	NA	NA
cg25335258	4.60858	0.0473067	6.00286e-05	NA	NA	NA	NA	NA	NA	NA	NA	NA	NA	NA	NA	NA	NA	NA	NA	NA	NA	NA	NA	NA	NA	NA	NA	NA	NA	NA	NA	NA	NA
cg25339408	NA	NA	NA	NA	NA	NA	NA	NA	NA	NA	NA	NA	NA	NA	NA	NA	NA	NA	NA	NA	NA	NA	NA	NA	4.53392	0.0264267	3.79579e-05	NA	NA	NA	NA	NA	NA
cg25345360	NA	NA	NA	NA	NA	NA	NA	NA	NA	NA	NA	NA	NA	NA	NA	NA	NA	NA	NA	NA	NA	NA	NA	NA	-3.54778	0.0177912	4.60717e-05	NA	NA	NA	NA	NA	NA
cg25358039	NA	NA	NA	NA	NA	NA	NA	NA	NA	NA	NA	NA	NA	NA	NA	NA	NA	NA	NA	NA	NA	NA	NA	NA	3.74091	0.0285644	0.000376197	NA	NA	NA	NA	NA	NA
cg25380021	4.22381	0.0118123	0.00017975	NA	NA	NA	NA	NA	NA	NA	NA	NA	NA	NA	NA	NA	NA	NA	NA	NA	NA	NA	NA	NA	4.74152	0.011006	2.05833e-05	NA	NA	NA	NA	NA	NA
cg25384897	NA	NA	NA	NA	NA	NA	NA	NA	NA	NA	NA	NA	NA	NA	NA	NA	NA	NA	NA	NA	NA	NA	NA	NA	3.84152	0.0313052	0.000282565	NA	NA	NA	NA	NA	NA
cg25389863	NA	NA	NA	NA	NA	NA	NA	NA	NA	NA	NA	NA	NA	NA	NA	NA	NA	NA	NA	NA	NA	NA	NA	NA	3.5696	0.0141956	0.000609987	NA	NA	NA	NA	NA	NA
cg25402480	NA	NA	NA	NA	NA	NA	NA	NA	NA	NA	NA	NA	NA	NA	NA	NA	NA	NA	NA	NA	NA	NA	NA	NA	3.76056	0.0267286	0.000355792	NA	NA	NA	NA	NA	NA
cg25426815	NA	NA	NA	NA	NA	NA	NA	NA	NA	NA	NA	NA	NA	NA	NA	NA	NA	NA	NA	NA	NA	NA	NA	NA	3.84462	0.0162445	0.00028008	NA	NA	NA	NA	NA	NA
cg25427967	-4.3257	0.0473349	0.000134709	NA	NA	NA	NA	NA	NA	NA	NA	NA	NA	NA	NA	NA	NA	NA	NA	NA	NA	NA	NA	NA	NA	NA	NA	NA	NA	NA	NA	NA	NA
cg25451958	NA	NA	NA	NA	NA	NA	NA	NA	NA	NA	NA	NA	NA	NA	NA	NA	NA	NA	NA	NA	NA	NA	NA	NA	5.01161	0.0366613	9.23576e-06	NA	NA	NA	NA	NA	NA
cg25503903	4.41125	0.0286182	0.000105613	NA	NA	NA	NA	NA	NA	NA	NA	NA	NA	NA	NA	NA	NA	NA	NA	NA	NA	NA	NA	NA	3.9958	0.0422452	0.000181632	NA	NA	NA	NA	NA	NA
cg25508679	5.80278	0.0319313	1.81915e-06	NA	NA	NA	NA	NA	NA	NA	NA	NA	NA	NA	NA	NA	NA	NA	NA	NA	NA	NA	NA	NA	4.96551	0.00967752	1.05937e-05	NA	NA	NA	NA	NA	NA
cg25518868	NA	NA	NA	NA	NA	NA	6.96495	0.0248614	1.45502e-06	NA	NA	NA	NA	NA	NA	NA	NA	NA	NA	NA	NA	NA	NA	NA	NA	NA	NA	NA	NA	NA	NA	NA	NA
cg25538627	NA	NA	NA	NA	NA	NA	NA	NA	NA	NA	NA	NA	NA	NA	NA	NA	NA	NA	NA	NA	NA	NA	NA	NA	NA	NA	NA	5.8204	0.0152841	2.0976e-05	NA	NA	NA
cg25602490	NA	NA	NA	NA	NA	NA	NA	NA	NA	NA	NA	NA	NA	NA	NA	NA	NA	NA	NA	NA	NA	NA	NA	NA	4.34962	0.0358401	6.51298e-05	NA	NA	NA	NA	NA	NA
cg25608973	4.16141	0.0369297	0.000214313	NA	NA	NA	NA	NA	NA	NA	NA	NA	NA	NA	NA	NA	NA	NA	NA	NA	NA	NA	NA	NA	4.17005	0.0443232	0.000109821	NA	NA	NA	NA	NA	NA
cg25639866	NA	NA	NA	NA	NA	NA	NA	NA	NA	NA	NA	NA	NA	NA	NA	NA	NA	NA	NA	NA	NA	NA	NA	NA	4.0101	0.0333221	0.000174312	NA	NA	NA	NA	NA	NA
cg25682097	4.5166	0.0448184	7.81608e-05	NA	NA	NA	NA	NA	NA	NA	NA	NA	NA	NA	NA	NA	NA	NA	NA	NA	NA	NA	NA	NA	NA	NA	NA	NA	NA	NA	NA	NA	NA
cg25686087	4.56581	0.0277095	6.78754e-05	NA	NA	NA	NA	NA	NA	NA	NA	NA	NA	NA	NA	NA	NA	NA	NA	NA	NA	NA	NA	NA	NA	NA	NA	NA	NA	NA	NA	NA	NA
cg25705526	NA	NA	NA	NA	NA	NA	NA	NA	NA	NA	NA	NA	NA	NA	NA	NA	NA	NA	NA	NA	NA	NA	NA	NA	3.81888	0.0292224	0.000301403	NA	NA	NA	NA	NA	NA
cg25721132	4.23371	0.031704	0.000174793	NA	NA	NA	NA	NA	NA	NA	NA	NA	NA	NA	NA	NA	NA	NA	NA	NA	NA	NA	NA	NA	5.14268	0.0395901	6.24875e-06	NA	NA	NA	NA	NA	NA
cg25741646	NA	NA	NA	NA	NA	NA	NA	NA	NA	NA	NA	NA	NA	NA	NA	NA	NA	NA	NA	NA	NA	NA	NA	NA	4.66305	0.0145358	2.59525e-05	NA	NA	NA	NA	NA	NA
cg25756470	NA	NA	NA	NA	NA	NA	NA	NA	NA	NA	NA	NA	NA	NA	NA	NA	NA	NA	NA	NA	NA	NA	NA	NA	3.69368	0.0457577	0.000430037	NA	NA	NA	NA	NA	NA
cg25792714	NA	NA	NA	NA	NA	NA	NA	NA	NA	NA	NA	NA	NA	NA	NA	NA	NA	NA	NA	NA	NA	NA	NA	NA	4.19673	0.0497801	0.000101643	NA	NA	NA	NA	NA	NA
cg25821963	NA	NA	NA	NA	NA	NA	NA	NA	NA	NA	NA	NA	NA	NA	NA	NA	NA	NA	NA	NA	NA	NA	NA	NA	4.08675	0.0277455	0.000139754	NA	NA	NA	NA	NA	NA
cg25832771	4.56206	0.028826	6.86103e-05	NA	NA	NA	NA	NA	NA	NA	NA	NA	NA	NA	NA	NA	NA	NA	NA	NA	NA	NA	NA	NA	NA	NA	NA	NA	NA	NA	NA	NA	NA
cg25893679	4.5446	0.0408281	7.21345e-05	NA	NA	NA	NA	NA	NA	NA	NA	NA	NA	NA	NA	NA	NA	NA	NA	NA	NA	NA	NA	NA	NA	NA	NA	NA	NA	NA	NA	NA	NA
cg25908973	NA	NA	NA	NA	NA	NA	6.09461	0.0306306	1.10901e-05	NA	NA	NA	NA	NA	NA	NA	NA	NA	NA	NA	NA	NA	NA	NA	NA	NA	NA	NA	NA	NA	NA	NA	NA
cg25913520	NA	NA	NA	NA	NA	NA	NA	NA	NA	NA	NA	NA	NA	NA	NA	NA	NA	NA	NA	NA	NA	NA	NA	NA	4.23008	0.0160895	9.22585e-05	NA	NA	NA	NA	NA	NA
cg25918351	NA	NA	NA	NA	NA	NA	NA	NA	NA	NA	NA	NA	NA	NA	NA	NA	NA	NA	NA	NA	NA	NA	NA	NA	3.69966	0.0150826	0.00042283	NA	NA	NA	NA	NA	NA
cg25923345	4.5664	0.0145391	6.77606e-05	NA	NA	NA	NA	NA	NA	NA	NA	NA	NA	NA	NA	NA	NA	NA	NA	NA	NA	NA	NA	NA	4.1166	0.0466972	0.000128203	NA	NA	NA	NA	NA	NA
cg25947489	NA	NA	NA	NA	NA	NA	NA	NA	NA	NA	NA	NA	NA	NA	NA	NA	NA	NA	NA	NA	NA	NA	NA	NA	8.35567	0.0434216	3.70499e-10	NA	NA	NA	NA	NA	NA
cg25968571	NA	NA	NA	NA	NA	NA	NA	NA	NA	NA	NA	NA	NA	NA	NA	NA	NA	NA	NA	NA	NA	NA	NA	NA	3.56626	0.00344312	0.000615722	NA	NA	NA	NA	NA	NA
cg25980689	NA	NA	NA	NA	NA	NA	NA	NA	NA	NA	NA	NA	NA	NA	NA	4.06742	0.0210753	1.30164e-05	NA	NA	NA	NA	NA	NA	NA	NA	NA	NA	NA	NA	NA	NA	NA
cg26065488	5.15152	0.0389687	1.24136e-05	NA	NA	NA	NA	NA	NA	NA	NA	NA	NA	NA	NA	NA	NA	NA	NA	NA	NA	NA	NA	NA	4.57844	0.0265155	3.33007e-05	NA	NA	NA	NA	NA	NA
cg26075830	NA	NA	NA	NA	NA	NA	NA	NA	NA	NA	NA	NA	NA	NA	NA	NA	NA	NA	NA	NA	NA	NA	NA	NA	4.29708	0.032835	7.59162e-05	NA	NA	NA	NA	NA	NA
cg26111761	4.44499	0.0355047	9.59216e-05	NA	NA	NA	NA	NA	NA	NA	NA	NA	NA	NA	NA	NA	NA	NA	NA	NA	NA	NA	NA	NA	4.82642	0.0462419	1.60089e-05	NA	NA	NA	NA	NA	NA
cg26112797	NA	NA	NA	NA	NA	NA	NA	NA	NA	NA	NA	NA	NA	NA	NA	NA	NA	NA	NA	NA	NA	NA	NA	NA	4.59503	0.0198312	3.17131e-05	NA	NA	NA	NA	NA	NA
cg26158950	4.25723	0.0488139	0.000163551	NA	NA	NA	NA	NA	NA	NA	NA	NA	NA	NA	NA	NA	NA	NA	NA	NA	NA	NA	NA	NA	NA	NA	NA	NA	NA	NA	NA	NA	NA
cg26165269	NA	NA	NA	NA	NA	NA	NA	NA	NA	NA	NA	NA	NA	NA	NA	NA	NA	NA	NA	NA	NA	NA	NA	NA	3.82524	0.0271594	0.000295994	NA	NA	NA	NA	NA	NA
cg26170133	NA	NA	NA	NA	NA	NA	NA	NA	NA	NA	NA	NA	NA	NA	NA	NA	NA	NA	NA	NA	NA	NA	NA	NA	3.70446	0.0451766	0.000417122	NA	NA	NA	NA	NA	NA
cg26201811	NA	NA	NA	NA	NA	NA	NA	NA	NA	NA	NA	NA	NA	NA	NA	NA	NA	NA	NA	NA	NA	NA	NA	NA	4.10563	0.0325868	0.000132334	NA	NA	NA	NA	NA	NA
cg26202195	NA	NA	NA	NA	NA	NA	NA	NA	NA	NA	NA	NA	NA	NA	NA	NA	NA	NA	NA	NA	NA	NA	NA	NA	3.9779	0.0380493	0.000191222	NA	NA	NA	NA	NA	NA
cg26205771	4.36535	0.0215744	0.000120354	NA	NA	NA	NA	NA	NA	NA	NA	NA	NA	NA	NA	NA	NA	NA	NA	NA	NA	NA	NA	NA	3.92681	0.0298274	0.000221416	NA	NA	NA	NA	NA	NA
cg26246928	NA	NA	NA	NA	NA	NA	NA	NA	NA	NA	NA	NA	NA	NA	NA	NA	NA	NA	NA	NA	NA	NA	NA	NA	6.12807	0.048324	3.22653e-07	NA	NA	NA	NA	NA	NA
cg26267310	NA	NA	NA	NA	NA	NA	NA	NA	NA	NA	NA	NA	NA	NA	NA	NA	NA	NA	NA	NA	NA	NA	NA	NA	3.94047	0.00560947	0.000212915	NA	NA	NA	NA	NA	NA
cg26279550	4.22013	0.0397922	0.000181626	NA	NA	NA	NA	NA	NA	NA	NA	NA	NA	NA	NA	NA	NA	NA	NA	NA	NA	NA	NA	NA	NA	NA	NA	NA	NA	NA	NA	NA	NA
cg26312542	NA	NA	NA	NA	NA	NA	NA	NA	NA	5.43433	0.00278372	2.33161e-06	NA	NA	NA	NA	NA	NA	NA	NA	NA	NA	NA	NA	NA	NA	NA	-5.896	0.0194864	2.1429e-06	NA	NA	NA
cg26338453	NA	NA	NA	NA	NA	NA	NA	NA	NA	NA	NA	NA	NA	NA	NA	NA	NA	NA	NA	NA	NA	NA	NA	NA	3.59818	0.00601899	0.000562942	NA	NA	NA	NA	NA	NA
cg26351776	5.90626	0.0315498	1.3379e-06	NA	NA	NA	NA	NA	NA	NA	NA	NA	NA	NA	NA	NA	NA	NA	NA	NA	NA	NA	NA	NA	5.91258	0.00585826	6.18754e-07	NA	NA	NA	NA	NA	NA
cg26363196	NA	NA	NA	NA	NA	NA	NA	NA	NA	NA	NA	NA	NA	NA	NA	NA	NA	NA	NA	NA	NA	NA	NA	NA	4.28537	0.0493713	7.85517e-05	NA	NA	NA	NA	NA	NA
cg26371771	NA	NA	NA	NA	NA	NA	NA	NA	NA	NA	NA	NA	NA	NA	NA	NA	NA	NA	NA	NA	NA	NA	NA	NA	3.96691	0.0334493	0.000197358	NA	NA	NA	NA	NA	NA
cg26377000	4.36517	0.0338537	0.000120418	NA	NA	NA	NA	NA	NA	NA	NA	NA	NA	NA	NA	NA	NA	NA	NA	NA	NA	NA	NA	NA	NA	NA	NA	NA	NA	NA	NA	NA	NA
cg26394244	NA	NA	NA	NA	NA	NA	NA	NA	NA	NA	NA	NA	NA	NA	NA	NA	NA	NA	NA	NA	NA	NA	NA	NA	3.95629	0.0040824	0.000203464	NA	NA	NA	NA	NA	NA
cg26401673	4.28987	0.00175799	0.000149116	NA	NA	NA	NA	NA	NA	NA	NA	NA	NA	NA	NA	NA	NA	NA	NA	NA	NA	NA	NA	NA	4.78124	0.00979377	1.83011e-05	NA	NA	NA	NA	NA	NA
cg26415547	NA	NA	NA	NA	NA	NA	NA	NA	NA	NA	NA	NA	NA	NA	NA	NA	NA	NA	NA	NA	NA	NA	NA	NA	4.14971	0.0082098	0.000116486	NA	NA	NA	NA	NA	NA
cg26421310	4.73408	0.0115086	4.18101e-05	NA	NA	NA	NA	NA	NA	NA	NA	NA	NA	NA	NA	NA	NA	NA	NA	NA	NA	NA	NA	NA	4.33677	0.00373706	6.7619e-05	NA	NA	NA	NA	NA	NA
cg26429856	NA	NA	NA	NA	NA	NA	NA	NA	NA	NA	NA	NA	NA	NA	NA	NA	NA	NA	NA	NA	NA	NA	NA	NA	4.56234	0.00728705	3.49159e-05	NA	NA	NA	NA	NA	NA
cg26437825	NA	NA	NA	NA	NA	NA	NA	NA	NA	NA	NA	NA	NA	NA	NA	NA	NA	NA	NA	NA	NA	NA	NA	NA	NA	NA	NA	6.14424	0.0246732	9.88024e-06	NA	NA	NA
cg26459700	NA	NA	NA	NA	NA	NA	NA	NA	NA	NA	NA	NA	NA	NA	NA	NA	NA	NA	NA	NA	NA	NA	NA	NA	4.90921	0.027376	1.25228e-05	NA	NA	NA	NA	NA	NA
cg26487259	NA	NA	NA	NA	NA	NA	6.70498	0.0135827	2.67144e-06	NA	NA	NA	NA	NA	NA	NA	NA	NA	NA	NA	NA	NA	NA	NA	NA	NA	NA	NA	NA	NA	NA	NA	NA
cg26503653	NA	NA	NA	NA	NA	NA	NA	NA	NA	NA	NA	NA	NA	NA	NA	NA	NA	NA	NA	NA	NA	NA	NA	NA	3.86413	0.0329757	0.000264904	NA	NA	NA	NA	NA	NA
cg26518861	4.83996	0.0238902	3.07746e-05	NA	NA	NA	NA	NA	NA	NA	NA	NA	NA	NA	NA	NA	NA	NA	NA	NA	NA	NA	NA	NA	NA	NA	NA	NA	NA	NA	NA	NA	NA
cg26527782	NA	NA	NA	NA	NA	NA	NA	NA	NA	NA	NA	NA	NA	NA	NA	NA	NA	NA	NA	NA	NA	NA	NA	NA	3.95598	0.0209327	0.000203648	NA	NA	NA	NA	NA	NA
cg26570179	4.3997	0.0471831	0.000109144	NA	NA	NA	NA	NA	NA	NA	NA	NA	NA	NA	NA	NA	NA	NA	NA	NA	NA	NA	NA	NA	NA	NA	NA	NA	NA	NA	NA	NA	NA
cg26575738	5.38424	0.00193086	6.26876e-06	NA	NA	NA	NA	NA	NA	NA	NA	NA	NA	NA	NA	NA	NA	NA	NA	NA	NA	NA	NA	NA	5.40048	0.00266598	2.88937e-06	NA	NA	NA	NA	NA	NA
cg26596964	4.15273	0.0405464	0.000219611	NA	NA	NA	NA	NA	NA	NA	NA	NA	NA	NA	NA	NA	NA	NA	NA	NA	NA	NA	NA	NA	NA	NA	NA	NA	NA	NA	NA	NA	NA
cg26597500	NA	NA	NA	NA	NA	NA	NA	NA	NA	NA	NA	NA	NA	NA	NA	NA	NA	NA	NA	NA	NA	NA	NA	NA	3.97015	0.0252961	0.000195527	NA	NA	NA	NA	NA	NA
cg26618965	4.44113	0.040683	9.69824e-05	NA	NA	NA	NA	NA	NA	NA	NA	NA	NA	NA	NA	NA	NA	NA	NA	NA	NA	NA	NA	NA	4.06514	0.0103753	0.00014875	NA	NA	NA	NA	NA	NA
cg26673436	NA	NA	NA	NA	NA	NA	NA	NA	NA	NA	NA	NA	NA	NA	NA	NA	NA	NA	NA	NA	NA	NA	NA	NA	4.26705	0.0164637	8.28537e-05	NA	NA	NA	NA	NA	NA
cg26676091	NA	NA	NA	NA	NA	NA	NA	NA	NA	NA	NA	NA	NA	NA	NA	NA	NA	NA	NA	NA	NA	NA	NA	NA	3.95495	0.00135595	0.00020425	NA	NA	NA	NA	NA	NA
cg26676559	NA	NA	NA	NA	NA	NA	NA	NA	NA	NA	NA	NA	NA	NA	NA	NA	NA	NA	NA	NA	NA	NA	NA	NA	4.40221	0.0286505	5.58509e-05	NA	NA	NA	NA	NA	NA
cg26711732	NA	NA	NA	NA	NA	NA	NA	NA	NA	NA	NA	NA	NA	NA	NA	NA	NA	NA	NA	NA	NA	NA	NA	NA	5.05686	0.0453266	8.07128e-06	NA	NA	NA	NA	NA	NA
cg26735598	NA	NA	NA	NA	NA	NA	NA	NA	NA	NA	NA	NA	NA	NA	NA	NA	NA	NA	NA	NA	NA	NA	NA	NA	4.26259	0.0481655	8.39379e-05	NA	NA	NA	NA	NA	NA
cg26749833	4.12299	0.0491156	0.000238756	NA	NA	NA	NA	NA	NA	NA	NA	NA	NA	NA	NA	NA	NA	NA	NA	NA	NA	NA	NA	NA	4.25323	0.0138973	8.62533e-05	NA	NA	NA	NA	NA	NA
cg26756625	4.52698	0.0345724	7.58703e-05	NA	NA	NA	NA	NA	NA	NA	NA	NA	NA	NA	NA	NA	NA	NA	NA	NA	NA	NA	NA	NA	4.10799	0.0400576	0.000131432	NA	NA	NA	NA	NA	NA
cg26781150	NA	NA	NA	NA	NA	NA	NA	NA	NA	NA	NA	NA	NA	NA	NA	NA	NA	NA	NA	NA	NA	NA	NA	NA	3.94511	0.0485998	0.000210097	NA	NA	NA	NA	NA	NA
cg26783079	NA	NA	NA	NA	NA	NA	NA	NA	NA	NA	NA	NA	NA	NA	NA	NA	NA	NA	NA	NA	NA	NA	NA	NA	3.98655	0.0286418	0.000186528	NA	NA	NA	NA	NA	NA
cg26789038	4.56838	0.0259168	6.73783e-05	NA	NA	NA	NA	NA	NA	NA	NA	NA	NA	NA	NA	NA	NA	NA	NA	NA	NA	NA	NA	NA	4.16061	0.0202072	0.000112867	NA	NA	NA	NA	NA	NA
cg26855812	NA	NA	NA	NA	NA	NA	NA	NA	NA	NA	NA	NA	NA	NA	NA	NA	NA	NA	NA	NA	NA	NA	NA	NA	3.7338	0.0475047	0.000383862	NA	NA	NA	NA	NA	NA
cg26893451	-4.4572	0.0349836	9.26337e-05	NA	NA	NA	NA	NA	NA	NA	NA	NA	NA	NA	NA	NA	NA	NA	NA	NA	NA	NA	NA	NA	NA	NA	NA	NA	NA	NA	NA	NA	NA
cg26911220	NA	NA	NA	NA	NA	NA	NA	NA	NA	NA	NA	NA	NA	NA	NA	NA	NA	NA	NA	NA	NA	NA	NA	NA	3.68323	0.032376	0.000442932	NA	NA	NA	NA	NA	NA
cg26913563	-4.15443	0.0397382	0.000218563	NA	NA	NA	NA	NA	NA	NA	NA	NA	NA	NA	NA	NA	NA	NA	NA	NA	NA	NA	NA	NA	NA	NA	NA	NA	NA	NA	NA	NA	NA
cg26915774	NA	NA	NA	NA	NA	NA	NA	NA	NA	NA	NA	NA	NA	NA	NA	NA	NA	NA	NA	NA	NA	NA	NA	NA	4.18132	0.0128065	0.000106291	NA	NA	NA	NA	NA	NA
cg27026045	4.45714	0.0311019	9.26495e-05	NA	NA	NA	NA	NA	NA	NA	NA	NA	NA	NA	NA	NA	NA	NA	NA	NA	NA	NA	NA	NA	3.87008	0.0434871	0.000260441	5.5703	0.0378594	3.74495e-05	NA	NA	NA
cg27056119	4.32315	0.0164226	0.000135684	NA	NA	NA	NA	NA	NA	NA	NA	NA	NA	NA	NA	NA	NA	NA	NA	NA	NA	NA	NA	NA	3.88088	0.0175956	0.000252525	NA	NA	NA	NA	NA	NA
cg27092594	4.08017	0.0360105	0.000269217	NA	NA	NA	NA	NA	NA	NA	NA	NA	NA	NA	NA	NA	NA	NA	NA	NA	NA	NA	NA	NA	NA	NA	NA	NA	NA	NA	NA	NA	NA
cg27093944	4.05591	0.0098163	0.000288127	NA	NA	NA	NA	NA	NA	NA	NA	NA	NA	NA	NA	NA	NA	NA	NA	NA	NA	NA	NA	NA	4.09623	0.0439585	0.000135977	NA	NA	NA	NA	NA	NA
cg27101125	4.9099	0.0430762	2.51193e-05	NA	NA	NA	NA	NA	NA	NA	NA	NA	NA	NA	NA	NA	NA	NA	NA	NA	NA	NA	NA	NA	4.9399	0.0283703	1.14315e-05	NA	NA	NA	NA	NA	NA
cg27123665	4.37335	0.0299266	0.000117647	NA	NA	NA	NA	NA	NA	NA	NA	NA	NA	NA	NA	NA	NA	NA	NA	NA	NA	NA	NA	NA	4.98889	0.0216467	9.882e-06	NA	NA	NA	NA	NA	NA
cg27128734	4.3474	0.0278359	0.000126656	NA	NA	NA	NA	NA	NA	NA	NA	NA	NA	NA	NA	NA	NA	NA	NA	NA	NA	NA	NA	NA	NA	NA	NA	NA	NA	NA	NA	NA	NA
cg27159719	NA	NA	NA	NA	NA	NA	NA	NA	NA	NA	NA	NA	NA	NA	NA	NA	NA	NA	NA	NA	NA	NA	NA	NA	3.75708	0.00183319	0.000359326	NA	NA	NA	NA	NA	NA
cg27193691	NA	NA	NA	NA	NA	NA	NA	NA	NA	NA	NA	NA	NA	NA	NA	NA	NA	NA	NA	NA	NA	NA	NA	NA	4.62339	0.0219753	2.91719e-05	NA	NA	NA	NA	NA	NA
cg27264484	NA	NA	NA	NA	NA	NA	NA	NA	NA	NA	NA	NA	NA	NA	NA	NA	NA	NA	6.31039	0.0264977	7.74623e-07	NA	NA	NA	NA	NA	NA	NA	NA	NA	NA	NA	NA
cg27277463	NA	NA	NA	NA	NA	NA	NA	NA	NA	NA	NA	NA	NA	NA	NA	NA	NA	NA	NA	NA	NA	NA	NA	NA	3.88305	0.0166192	0.000250961	NA	NA	NA	NA	NA	NA
cg27292588	4.11015	0.0281828	0.000247515	NA	NA	NA	NA	NA	NA	NA	NA	NA	NA	NA	NA	NA	NA	NA	NA	NA	NA	NA	NA	NA	NA	NA	NA	NA	NA	NA	NA	NA	NA
cg27303223	4.54397	0.0336792	7.2264e-05	NA	NA	NA	NA	NA	NA	NA	NA	NA	NA	NA	NA	NA	NA	NA	NA	NA	NA	NA	NA	NA	4.0377	0.0247757	0.000160996	NA	NA	NA	NA	NA	NA
cg27305383	4.31552	0.0274903	0.000138658	NA	NA	NA	NA	NA	NA	NA	NA	NA	NA	NA	NA	NA	NA	NA	NA	NA	NA	NA	NA	NA	NA	NA	NA	NA	NA	NA	NA	NA	NA
cg27337397	NA	NA	NA	NA	NA	NA	NA	NA	NA	NA	NA	NA	NA	NA	NA	NA	NA	NA	NA	NA	NA	NA	NA	NA	3.61033	0.00358735	0.000544032	NA	NA	NA	NA	NA	NA
cg27346528	4.05085	0.0369268	0.000292231	NA	NA	NA	NA	NA	NA	NA	NA	NA	NA	NA	NA	NA	NA	NA	NA	NA	NA	NA	NA	NA	NA	NA	NA	NA	NA	NA	NA	NA	NA
cg27395939	NA	NA	NA	NA	NA	NA	NA	NA	NA	NA	NA	NA	NA	NA	NA	NA	NA	NA	NA	NA	NA	NA	NA	NA	4.36703	0.0259521	6.19012e-05	NA	NA	NA	NA	NA	NA
cg27411712	4.70443	0.0277349	4.55474e-05	NA	NA	NA	NA	NA	NA	NA	NA	NA	NA	NA	NA	NA	NA	NA	NA	NA	NA	NA	NA	NA	3.75513	0.0217157	0.000361321	NA	NA	NA	NA	NA	NA
cg27428744	4.16093	0.0298134	0.000214604	NA	NA	NA	NA	NA	NA	NA	NA	NA	NA	NA	NA	NA	NA	NA	NA	NA	NA	NA	NA	NA	NA	NA	NA	NA	NA	NA	NA	NA	NA
cg27448110	NA	NA	NA	NA	NA	NA	NA	NA	NA	NA	NA	NA	NA	NA	NA	NA	NA	NA	NA	NA	NA	NA	NA	NA	4.4431	0.0185055	4.95493e-05	NA	NA	NA	NA	NA	NA
cg27452341	NA	NA	NA	NA	NA	NA	NA	NA	NA	NA	NA	NA	NA	NA	NA	NA	NA	NA	NA	NA	NA	NA	NA	NA	4.05327	0.00795095	0.00015393	NA	NA	NA	NA	NA	NA
cg27455331	NA	NA	NA	NA	NA	NA	NA	NA	NA	NA	NA	NA	NA	NA	NA	NA	NA	NA	NA	NA	NA	NA	NA	NA	3.67979	0.0131705	0.000447269	NA	NA	NA	NA	NA	NA
cg27541454	NA	NA	NA	NA	NA	NA	NA	NA	NA	NA	NA	NA	NA	NA	NA	NA	NA	NA	NA	NA	NA	NA	NA	NA	3.57354	0.00640041	0.000603278	NA	NA	NA	NA	NA	NA
cg27599015	NA	NA	NA	NA	NA	NA	NA	NA	NA	NA	NA	NA	NA	NA	NA	NA	NA	NA	NA	NA	NA	NA	NA	NA	4.61669	0.00933444	2.97534e-05	NA	NA	NA	NA	NA	NA
cg27600813	NA	NA	NA	NA	NA	NA	NA	NA	NA	NA	NA	NA	NA	NA	NA	NA	NA	NA	NA	NA	NA	NA	NA	NA	4.60234	0.016016	3.10383e-05	NA	NA	NA	NA	NA	NA
cg27625456	NA	NA	NA	NA	NA	NA	NA	NA	NA	NA	NA	NA	NA	NA	NA	NA	NA	NA	NA	NA	NA	NA	NA	NA	4.06065	0.0188908	0.000150688	NA	NA	NA	NA	NA	NA
cg27637521	4.37149	0.0396438	0.00011827	NA	NA	NA	NA	NA	NA	NA	NA	NA	NA	NA	NA	NA	NA	NA	NA	NA	NA	NA	NA	NA	3.78385	0.0287103	0.00033301	NA	NA	NA	NA	NA	NA
cg27644733	NA	NA	NA	NA	NA	NA	NA	NA	NA	NA	NA	NA	NA	NA	NA	NA	NA	NA	NA	NA	NA	NA	NA	NA	4.98046	0.0275764	1.01328e-05	NA	NA	NA	NA	NA	NA
cg27657131	NA	NA	NA	NA	NA	NA	NA	NA	NA	NA	NA	NA	NA	NA	NA	NA	NA	NA	NA	NA	NA	NA	NA	NA	3.83657	0.00837362	0.000286588	NA	NA	NA	NA	NA	NA
ch.1.30340112R	-4.67363	0.0411886	4.97779e-05	NA	NA	NA	NA	NA	NA	NA	NA	NA	NA	NA	NA	NA	NA	NA	NA	NA	NA	NA	NA	NA	NA	NA	NA	NA	NA	NA	NA	NA	NA
